# Supplementary material for: A Comprehensive and Universal Method for Assessing the Performance of Differential Gene Expression Analyses
Source: PLoS One. 2010 Sep 9;5(9):e12657. doi: 10.1371/journal.pone.0012657 (PMC2936572; doi:10.1371/journal.pone.0012657)
Supplement: Table S1 — Raw data (before normalization) without introduced changes. In this research we used the group of arrays created from 20 samples from Epstein-Barr Virus (EBV)-transformed B cells collected from normal healthy donors (Illumina Whole Genome, Human Ref-8 V2.0 arrays containing over 20,000 genes). This presumably homogenous group was split into two equal subgroups. One of the subgroups (columns Q-Z) was used as a control, whereas the artificial changes in gene expressions were introduced in another subgroup (experimental - G-P columns). All data were sorted by the average expression in experimental group. (6.30 MB XLSX) [file pone.0012657.s003.xlsx]

## Sheet: Table S1
Table S1. Raw data (before normalization) without introduced changes. In this research we used the group of arrays created from 20 samples from Epstein-Barr Virus (EBV)-transformed B cells collected from normal healthy donors (Illumina Whole Genome, Human Ref-8 V2.0 arrays containing over 20,000 genes). This presumably homogenous group was split into two equal subgroups. One of the subgroups (col…
	TargetID	Accession	Symbol	Definition	Ontology	Array1	Array2	Array3	Array4	Array5	Array6	Array7	Array8	Array9	Array10	Array11	Array12	Array13	Array14	Array15	Array16	Array17	Array18	Array19	Array20
1	GI_14043068-S	NM_000517.3	HBA2	Homo sapiens hemoglobin, alpha 2 (HBA2), mRNA.	go_component: hemoglobin complex [goid 0005833] [evidence P]	75958.1	7881.5	10451.5	70215.2	76735.2	74623.9	70765.3	77058.3	74415.6	74171.1	75171	67828.1	15306.2	13321.2	70987.8	13677.1	13553.6	70056.2	71312.8	62760.9
2	GI_14456711-S	NM_000558.3	HBA1	Homo sapiens hemoglobin, alpha 1 (HBA1), mRNA.	go_component: hemoglobin complex [goid 0005833] [evidence TAS] [pmid 7555018]; go_function: protein binding [goid 0005515] [evidence TAS]; go_function: oxygen transporter activity [goid 0005344] [evidence IEA]; go_process: oxygen transport [goid 0015671] [evidence TAS]; go_process: transport [goid 0006810] [evidence IEA]	74917.6	8811.6	10209.3	67950	76063.2	73526.7	68364.9	73372.9	75564.4	73464.3	77619.5	66679	14196.4	14023.7	72707.4	13202.9	12528.9	71058.4	70182.8	62216.8
3	GI_28302128-S	NM_000518.4	HBB	Homo sapiens hemoglobin, beta (HBB), mRNA.	go_component: hemoglobin complex [goid 0005833] [evidence P]	68990.2	8936.4	10354.2	64603.3	64254.9	69844.7	54557.3	71763.4	73381.7	61396.1	65198.2	57349.1	14393.2	13311.1	74063.7	13406.5	13025.7	70634.3	71297.2	51340.5
4	GI_6633803-S	NM_000519.2	HBD	Homo sapiens hemoglobin, delta (HBD), mRNA.	go_component: hemoglobin complex [goid 0005833] [evidence TAS] [pmid 7555018]; go_function: globin [goid 0001524] [evidence IEA]; go_function: oxygen transporter activity [goid 0005344] [evidence IEA]; go_process: oxygen transport [goid 0015671] [evidence IEA]; go_process: transport [goid 0006810] [evidence IEA]	47463.1	9838.8	11475.4	51841.1	58528.2	53970	30721	56992.4	67808.9	51162.5	55180.2	46058.6	10578.1	7119.4	75082.4	7928.8	6004.3	70216.6	69953.8	40377.3
5	GI_27734702-S	NM_173611.1	FLJ38426	Homo sapiens hypothetical protein FLJ38426 (FLJ38426), mRNA.		41535	5638.8	6838.7	31167	39906.4	18964.8	23867.2	51933.6	48829.3	45505	46708.7	41633.2	7633	6610.5	77220.4	4740.2	4708.8	68227.1	62610.5	20728.2
6	GI_4508040-S	NM_003430.1	ZNF91	Homo sapiens zinc finger protein 91 (HPF7, HTF10) (ZNF91), mRNA.	go_component: nucleus [goid 0005634] [evidence NAS]; go_function: zinc ion binding [goid 0008270] [evidence NAS] [pmid 8467795]; go_function: transcription factor activity [goid 0003700] [evidence NAS] [pmid 2023909]; go_process: regulation of transcription, DNA-dependent [goid 0006355] [evidence NAS]	40466.1	6688.1	8504.6	25252.4	31492.8	14752.9	31152.9	42130.8	36012.8	43381	41611.5	32796.4	9580.4	8652.7	76502.3	5292.6	5162.5	65255.5	61906.3	12906.6
7	GI_40255066-S	NM_144682.2	FLJ31952	Homo sapiens hypothetical protein FLJ31952 (FLJ31952), mRNA.		33404	4603.2	5517	21937.6	29147	13817.7	23506.4	44357.6	33197.7	40662.6	36836.6	31238.7	5955.9	5013.3	71325.6	3383.8	3149.9	56854	51782.8	13475.2
8	GI_38195085-S	NM_022098.2	LOC63929	Homo sapiens hypothetical protein LOC63929 (LOC63929), mRNA.		34634.3	4201.7	5319.9	21980.8	28862.5	11072.7	24396.8	43175.3	35170.8	41111.9	36072.2	31635.5	6029.2	5745.8	75466.7	3199.3	2890.8	52660.3	49479.8	12638.9
9	GI_34577082-A	NM_152724.2	RSU1	Homo sapiens Ras suppressor protein 1 (RSU1), transcript variant 2, mRNA.	go_process: oncogenesis [goid 0007048] [evidence TAS] [pmid 1508180]; go_process: signal transduction [goid 0007165] [evidence TAS] [pmid 1508180]	28749.1	6209.8	6686.3	28401.6	29017	16801.3	22032.6	37954.2	26728.8	35248.2	31092.3	26542.4	6169.1	5287.8	74019.3	3281.7	3218.9	53190	56203.8	11196.5
10	GI_34486089-S	NM_004152.2	OAZ1	Homo sapiens ornithine decarboxylase antizyme 1 (OAZ1), mRNA.	go_function: ornithine decarboxylase inhibitor activity [goid 0008073] [evidence TAS] [pmid 7813017]; go_process: polyamine biosynthesis [goid 0006596] [evidence TAS] [pmid 7813017]	27847.5	6988	8400.1	21307.7	25898.1	20681.7	24960.6	22985.1	37053.9	22769.5	26156	17270.8	10400.4	9657.6	54922	7005.7	7801.6	63038.5	57456.3	13082.8
11	GI_39930576-S	NM_198150.1	DKFZp313G1735	Homo sapiens hypothetical protein DKFZp313G1735 (DKFZp313G1735), mRNA.	go_function: sulfuric ester hydrolase activity [goid 0008484] [evidence IEA]; go_process: metabolism [goid 0008152] [evidence IEA]	25391	4531	5153.1	22443.9	24269.6	14694.4	17836.5	33666.7	26448.6	27252.1	26376.6	23677.2	4777.8	2294	72372.5	2433.4	2291.6	43617	47678	10871.6
12	GI_18141306-S	NM_014331.2	SLC7A11	Homo sapiens solute carrier family 7, (cationic amino acid transporter, y+ system) member 11 (SLC7A11), mRNA.	go_component: integral to membrane [goid 0016021] [evidence TAS] [pmid 10206947]; go_function: cystine:glutamate antiporter activity [goid 0015327] [evidence TAS] [pmid 10206947]; go_function: amino acid permease activity [goid 0015359] [evidence IEA]; go_process: protein complex assembly [goid 0006461] [evidence NR]; go_process: amino acid transport [goid 0006865] [evidence IEA]; go_process: tra…	25840.3	3584.8	4218.4	18219.4	22187.7	12549.4	17563.7	34792.5	24094.3	27710.5	22907.2	24946.1	3667.7	2932.1	74085.7	1831.6	1730.1	47640	44673.9	9442.3
13	GI_22538474-S	NM_018955.2	UBB	Homo sapiens ubiquitin B (UBB), mRNA.	go_function: ubiquitin [goid 0005551] [evidence E]; go_process: protein modification [goid 0006464] [evidence E]	15506	11464.4	13624	26484.9	19755.1	26276.4	14786.8	12087.6	26429.6	15228.9	16472.2	14812.6	11472.4	11701.8	46280.9	7973.6	7642.7	68682.6	28482	25846.4
14	GI_45333882-S	NM_152903.3	KBTBD6	Homo sapiens kelch repeat and BTB (POZ) domain containing 6 (KBTBD6), mRNA.	go_function: protein binding [goid 0005515] [evidence IEA]	23627.5	3837.4	4879.2	16135.4	22415.8	9792.1	16120.3	29511.3	26365.5	29104.4	30048.1	22878.8	4756.5	4848.2	71343.5	2919.2	2779.4	45090.5	42812	10005.2
15	GI_24850112-S	NM_024745.2	SHCBP1	Homo sapiens likely ortholog of mouse Shc SH2-domain binding protein 1 (SHCBP1), mRNA.		22785.7	4235.8	4687.7	23797.9	22627	15087.8	16181.1	34598.5	20856.1	26421	25186.5	22067.6	4328	3338.6	73119.5	1980.4	1793.1	43226.2	43143.7	8754.6
16	GI_37552539-S	XM_211460.2	LOC284434	Homo sapiens hypothetical protein LOC284434 (LOC284434), mRNA.		25474.6	3331.7	3665.8	16291.6	23814.2	9129.4	16074.8	31711.8	26686.1	31618.3	27922.7	25844.1	4506.8	4275.3	67315.1	2390.1	2280.7	46351.9	36027.2	11641.9
17	GI_34304116-S	NM_021009.2	UBC	Homo sapiens ubiquitin C (UBC), mRNA.	go_function: ubiquitin [goid 0005551] [evidence E] [pmid 9644242]; go_function: polyubiquitin [goid 0005552] [evidence E] [pmid 9644242]	21499.8	5289.8	6342.3	18889.2	23177.2	12183.8	16365.2	30109.5	24608.8	24351.1	26099.3	20562.7	5424.2	5131	39850.5	3373.6	3012.2	45463.7	39086	10185.3
18	GI_21396485-I	NM_018607.4	PRO1853	Homo sapiens hypothetical protein PRO1853 (PRO1853), transcript variant 2, mRNA.		18196.1	3742.9	4432.3	12821.9	17599.2	6792.1	13110	24013.7	23534.7	23857.1	23180	19945.4	4697.6	4645.7	63624	3096.3	2949.5	51529	45932	9388.2
19	GI_33859792-S	NM_173494.1	MGC35261	Homo sapiens hypothetical protein MGC35261 (MGC35261), mRNA.		22792.7	2608.7	2861.8	12677.6	20150.1	6419.4	17416.3	27802.3	20330.8	29421.5	24604.1	21945.6	4411.9	3437.9	67777.1	2149.9	1894.5	36080.1	34243.1	8235.7
20	GI_5016088-S	NM_001101.2	ACTB	Homo sapiens actin, beta (ACTB), mRNA.	go_component: actin filament [goid 0005884] [evidence IEA]; go_function: structural constituent of cytoskeleton [goid 0005200] [evidence TAS] [pmid 6202424]; go_function: motor activity [goid 0003774] [evidence IEA]; go_process: cell motility [goid 0006928] [evidence TAS] [pmid 6202424]	21852.6	4605.2	5480.5	16473.3	22631.3	12276.2	17429.7	32601.1	19002.2	23153.2	26986.6	17344.8	6689.6	6300.8	41268.1	3615.5	3689	36693.5	33578.7	7959.1
21	GI_7706305-S	NM_016016.1	CGI-69	Homo sapiens CGI-69 protein (CGI-69), mRNA.	go_component: mitochondrion [goid 0005739] [evidence IEA]; go_component: integral to membrane [goid 0016021] [evidence IEA]; go_component: mitochondrial inner membrane [goid 0005743] [evidence IEA]; go_component: inner membrane [goid 0019866] [evidence IEA]; go_function: binding [goid 0005488] [evidence IEA]; go_process: transport [goid 0006810] [evidence IEA]	19326.6	5072.5	6425.8	16205.7	14739	11648.3	14515.5	6522.8	18358.7	10972.3	13962.9	10286.6	7467.5	6856.1	50002.6	6675.7	6580.9	48261.7	40924.1	14945.7
22	GI_4557290-I	NM_000383.1	AIRE	Homo sapiens autoimmune regulator (autoimmune polyendocrinopathy candidiasis ectodermal dystrophy) (AIRE), transcript variant AIRE-1, mRNA.	go_component: cytoplasm [goid 0005737] [evidence IEA]; go_component: nucleus [goid 0005634] [evidence NAS] [pmid 9398840]; go_function: transcription factor activity [goid 0003700] [evidence TAS] [pmid 9398839]; go_function: molecular_function unknown [goid 0005554] [evidence ND]; go_function: translation regulator activity [goid 0045182] [evidence IEA]; go_process: immune response [goid 0006955]…	18219.1	2750.9	3427.5	16965.1	17649.4	11482.4	12030.6	25622.5	16411.9	20203.8	17158.6	16926.3	3074.3	2153.2	62528.7	1519.5	1180.7	29716.1	28836	6521.7
23	GI_42660142-S	XM_370714.2	LOC387908	Homo sapiens similar to Ferritin heavy chain (Ferritin H subunit) (LOC387908), mRNA.		19507.8	5192.6	6413.3	13935.4	21274.2	10059.8	17044.7	21950.3	21769.8	16179.5	23318.1	14611.9	5214.1	5088	28908.8	2383.2	2402.3	30633.1	32836.8	13116.2
24	GI_42794272-S	NM_203373.1	LOC283807	Homo sapiens hypothetical protein LOC283807 (LOC283807), mRNA.		15327.9	2538.5	3086.9	10994.4	15693.6	4770.8	10955.1	20592	17268.9	16718.6	18007.1	15182	3811	2679.2	64876.6	1901.4	1463.6	39312.2	37167.4	5346.7
25	GI_33589825-S	NM_031482.3	APG10L	Homo sapiens APG10 autophagy 10-like (S. cerevisiae) (APG10L), mRNA.		16134.7	2554.7	3058	14182.7	15523.2	7786.3	11793.1	24453.8	13541.2	19388.7	16465.5	14918.5	2577.3	1803.7	65609.1	1271	1035.5	27920.2	29988.4	6224.9
26	GI_42658782-S	XM_376800.1	LOC401483	Homo sapiens similar to Hypothetical zinc finger protein KIAA0628 (LOC401483), mRNA.		15757.1	2070.1	2457.4	12060.9	14074.6	6348.2	10005.7	24398.1	14265.3	18672.7	15067.5	15824	2515.1	1210.4	61334.8	1098.3	758.5	26558.6	27201.5	6065
27	GI_19924114-I	NM_133509.1	RAD51L1	Homo sapiens RAD51-like 1 (S. cerevisiae) (RAD51L1), transcript variant 3, mRNA.	go_component: nucleus [goid 0005634] [evidence TAS] [pmid 9512535]; go_function: adenosinetriphosphatase activity [goid 0004002] [evidence P] [pmid 9512535]; go_function: DNA binding [goid 0003677] [evidence P] [pmid 9512535]; go_function: DNA dependent ATPase activity [goid 0008094] [evidence IEA]; go_function: damaged DNA binding [goid 0003684] [evidence IEA]; go_function: nucleotide binding [g…	14464.9	2809.7	3256.4	11440.3	14787.3	6222.9	10891.3	20476.3	14909.2	18582.6	17559.6	16345.2	3106	2631.1	54991.4	1635.4	1494.9	28099.5	24095.2	6213.9
28	GI_28302130-S	NM_000559.2	HBG1	Homo sapiens hemoglobin, gamma A (HBG1), mRNA.	go_component: hemoglobin complex [goid 0005833] [evidence TAS] [pmid 8566966]; go_function: oxygen transporter activity [goid 0005344] [evidence IEA]; go_process: oxygen transport [goid 0015671] [evidence IEA]; go_process: transport [goid 0006810] [evidence IEA]	29203.3	10979.6	11323.4	3399	30577.2	17782.2	23306.1	8111.6	7807.5	12921.2	8970.5	7439.1	1219.8	1245.3	10702.1	3282.3	2985.6	71507.7	7895.1	3027.1
29	GI_28302132-S	NM_000184.2	HBG2	Homo sapiens hemoglobin, gamma G (HBG2), mRNA.	go_component: hemoglobin complex [goid 0005833] [evidence P]	26825	9595.7	12018.3	3150	32793	16292	21556	7146.3	8760.7	12594.4	9054.9	6463.1	1321.1	1310.3	10254.3	3033	2865.8	71909.2	7639	2963.2
30	GI_37540076-S	XM_086186.3	FLJ13815	Homo sapiens hypothetical protein FLJ13815 (FLJ13815), mRNA.		13830.7	2451.3	2907.3	12756.3	14454.9	8121.9	10262.9	20787.8	13642.7	15703.3	14341.5	14190.6	2830.5	1416	56667.5	1356.1	949.9	25917.2	26887.5	5334.6
31	GI_24308268-S	NM_021218.1	C9orf80	Homo sapiens chromosome 9 open reading frame 80 (C9orf80), mRNA.		15347.7	2559.7	3044.6	11204.5	12858.2	7558.6	10300.6	22717.1	12373.6	15979	13264	14676.2	2751.3	2259.4	48666	1432.4	1240.8	27672.7	26473.9	5757.3
32	GI_34328943-S	NM_021109.2	TMSB4X	Homo sapiens thymosin, beta 4, X-linked (TMSB4X), mRNA.	go_component: cytoskeleton [goid 0005856] [evidence IEA]; go_function: actin modulating activity [goid 0003790] [evidence TAS] [pmid 8617195]; go_process: development [goid 0007275] [evidence TAS] [pmid 3500230]; go_process: cell shape and cell size control [goid 0007148] [evidence NR]; go_process: immune response [goid 0006955] [evidence TAS] [pmid 3500230]; go_process: protein complex assembly …	13683.8	2228	2571.7	12593.1	18351.3	11273.4	9091	17616	18837.2	15922.5	18443.5	13685	3648	1103.8	32969.6	1845.8	1184.9	28473.6	22064	5434.2
33	GI_20149497-S	NM_000146.2	FTL	Homo sapiens ferritin, light polypeptide (FTL), mRNA.	go_component: ferritin complex [goid 0008043] [evidence E] [pmid 7492760]; go_function: iron ion binding [goid 0005506] [evidence E]; go_process: iron ion homeostasis [goid 0006879] [evidence E] [pmid 7492760]	11740.2	4687.8	5241.7	7930.5	12365.7	6427.9	9692.1	11870.5	12574.5	12323.9	12077.1	10708.8	4966.9	4686.2	47038.5	3660.4	3585.5	26136.3	35637	4570.1
34	GI_34013529-S	NM_183049.1	TMSL3	Homo sapiens thymosin-like 3 (TMSL3), mRNA.		10037.8	5561.4	6457.3	9434.5	13085.8	11103.3	8397.2	9872.3	13947.9	12306.3	12373.6	8643.8	8033.4	7533.4	29722.6	4776.1	4452.6	29765.9	34606.9	3776.2
35	GI_8922201-I	NM_017979.1	SMAP-1	Homo sapiens smooth muscle cell associated protein-1 (SMAP-1), mRNA.		13647.7	2608.6	3173.4	11179.6	12007.3	6230	9800.6	21097.7	12974.4	17299.9	12996.3	14651.1	2488.3	2067.6	45937	1210.4	1146.8	24036.4	23621.3	5176
36	GI_19913436-S	NM_001694.2	ATP6V0C	Homo sapiens ATPase, H+ transporting, lysosomal 16kDa, V0 subunit c (ATP6V0C), mRNA.	go_component: vacuolar hydrogen-transporting ATPase [goid 0000219] [evidence TAS] [pmid 1709739]; go_component: integral to membrane [goid 0016021] [evidence TAS] [pmid 1709739]; go_function: hydrogen ion transporter activity [goid 0015078] [evidence IEA]; go_function: hydrogen-transporting two-sector ATPase activity [goid 0003936] [evidence TAS]; go_function: hydrolase activity [goid 0016787] [e…	15071.3	2834.7	3346.9	8743.2	13162.7	7466.1	11557.8	9020.2	16333.6	14173.7	15589.5	9631.5	4946.4	4079.1	47361.8	3054.6	3015.1	21752.5	21010	10691
37	GI_4557298-S	NM_000032.1	ALAS2	Homo sapiens aminolevulinate, delta-, synthase 2 (sideroblastic/hypochromic anemia) (ALAS2), nuclear gene encoding mitochondrial protein, mRNA.	go_process: heme biosynthesis [goid 0006783] [evidence P] [pmid 2347585]	11227.6	9519.7	11130.9	6260.4	10594	10963.1	9080.8	2178	7641.2	3860.8	5496.5	4242.8	8442.1	7749.4	37510.2	3385.6	3109.5	42710.7	18837.4	22626
38	GI_22907036-S	NM_145699.2	APOBEC3A	Homo sapiens apolipoprotein B mRNA editing enzyme, catalytic polypeptide-like 3A (APOBEC3A), mRNA.	go_component: cellular_component unknown [goid 0008372] [evidence ND]; go_function: zinc ion binding [goid 0008270] [evidence IEA]; go_function: molecular_function unknown [goid 0005554] [evidence ND] [pmid 10469298]; go_function: hydrolase activity [goid 0016787] [evidence IEA]; go_process: mRNA processing [goid 0006397] [evidence IEA]; go_process: biological_process unknown [goid 0000004] [evid…	12310.5	2396.1	2811.3	10409.9	12454.9	6023.3	7439.3	21834.8	11087.2	15411.8	11601	13931.8	2262.4	1921.1	55332	950.8	996	21057.2	22013.1	3958
39	GI_11995467-S	NM_021034.1	IFITM3	Homo sapiens interferon induced transmembrane protein 3 (1-8U) (IFITM3), mRNA.	go_component: integral to membrane [goid 0016021] [evidence IEA]; go_process: immune response [goid 0006955] [evidence TAS] [pmid 1906403]	11309.6	4306.7	4720.5	6742.3	15022.1	6275.5	9289.9	13526.2	9552.3	10127.7	12559.3	12254.9	5790.8	5652.1	46530.7	3139.3	2892.9	17717.3	30827.6	3644.6
40	GI_15055538-S	NM_002952.2	RPS2	Homo sapiens ribosomal protein S2 (RPS2), mRNA.	go_component: cytosolic small ribosomal subunit (sensu Eukarya) [goid 0005843] [evidence P] [pmid 2308862]; go_function: structural protein of ribosome [goid 0003735] [evidence P] [pmid 2308862]; go_function: RNA binding [goid 0003723] [evidence P] [pmid 2308862]; go_process: protein biosynthesis [goid 0006412] [evidence P] [pmid 2308862]	11209.9	5146.5	5750	9952.2	10913.4	5778.8	9605.1	11854.6	14650.3	10371	15569.9	8841.5	5078.8	4529.9	30826.8	3144.4	3001	32696.7	28464	2264.9
41	GI_27886649-I	NM_030779.2	KCNH6	Homo sapiens potassium voltage-gated channel, subfamily H (eag-related), member 6 (KCNH6), transcript variant 1, mRNA.	go_component: integral to membrane [goid 0016021] [evidence IEA]; go_function: voltage-gated potassium channel activity [goid 0005249] [evidence IEA]; go_process: cation transport [goid 0006812] [evidence IEA]; go_process: potassium ion transport [goid 0006813] [evidence IEA]; go_process: regulation of transcription, DNA-dependent [goid 0006355] [evidence IEA]; go_process: signal transduction [go…	9967.1	2409.3	2799.1	7580.4	11848.8	3991.6	7368.9	14782.4	13319	13217	11990.3	11720.9	3283.1	2729.2	44799.5	1654.1	1548.7	30470.6	28825.6	4034.9
42	GI_5016091-S	NM_001621.2	AHR	Homo sapiens aryl hydrocarbon receptor (AHR), mRNA.	go_component: nucleus [goid 0005634] [evidence IDA] [pmid 10395741]; go_function: ligand-dependent nuclear receptor activity [goid 0004879] [evidence IDA] [pmid 10395741]; go_function: DNA binding [goid 0003677] [evidence E] [pmid 8246913]; go_function: transcription factor activity [goid 0003700] [evidence NR] [pmid 9170146]; go_process: cell cycle [goid 0007049] [evidence TAS] [pmid 12213388]; …	11789.5	2267.5	2399	9741.9	10067.1	4655.1	8424.9	23012.5	10331.3	15614.3	11045.3	12515.9	1698.5	1240.8	57634.4	693.3	697.4	18551.9	19011	4571.3
43	GI_14916472-S	NM_033128.1	SCIN	Homo sapiens scinderin (SCIN), mRNA.		11117.8	1434.7	1558.5	9425.8	11099.5	5410.5	7499.3	19642.3	10811.4	14219	10481.6	12950.2	1397.6	1106.2	55211.2	598.8	633.8	19056.8	20568.5	4470
44	GI_20336255-I	NM_138687.1	PIP5K2B	Homo sapiens phosphatidylinositol-4-phosphate 5-kinase, type II, beta (PIP5K2B), transcript variant 2, mRNA.	go_component: cytoplasm [goid 0005737] [evidence NR]; go_function: 1-phosphatidylinositol-4-phosphate kinase [goid 0004431] [evidence E]; go_function: receptor signaling protein activity [goid 0005057] [evidence TAS] [pmid 9038203]; go_function: kinase activity [goid 0016301] [evidence IEA]; go_function: 1-phosphatidylinositol-4-phosphate 5-kinase activity [goid 0016308] [evidence IEA]; go_functi…	12092.3	2229.7	2679.6	9765.1	11249.3	5322.3	8378.1	19544.1	9289.4	15773.4	10948.4	11870.6	1974.4	1726.7	46946.7	932.8	944.5	19880.1	21604.6	4175.5
45	GI_13376659-S	NM_025097.1	FLJ21106	Homo sapiens hypothetical protein FLJ21106 (FLJ21106), mRNA.		10494.8	2279.7	2418.1	8388.2	10977.7	3676.6	7311.8	15329.4	13342.8	14703.8	14644.4	11634.7	3016.3	2879	39491.3	1565.4	1532.7	23727.7	24500.3	4589.3
46	GI_10835001-S	NM_001175.1	ARHGDIB	Homo sapiens Rho GDP dissociation inhibitor (GDI) beta (ARHGDIB), mRNA.	go_component: cytoplasmic vesicle [goid 0016023] [evidence TAS] [pmid 9113980]; go_function: Rho GDP-dissociation inhibitor activity [goid 0005094] [evidence TAS] [pmid 8262133]; go_function: GTPase activator activity [goid 0005096] [evidence IEA]; go_process: negative regulation of cell adhesion [goid 0007162] [evidence TAS] [pmid 9113980]; go_process: Rho protein signal transduction [goid 00072…	11796.7	3456.9	3545.7	13064.3	14265	9902.3	11424.5	15484	10144.4	12648.9	14166.6	9350.3	4248.7	4233.2	28425.3	2052.5	2116.2	18921.1	20581	4028
47	GI_13376528-S	NM_025009.1	FLJ13621	Homo sapiens hypothetical protein FLJ13621 (FLJ13621), mRNA.		10645	3221.3	3792.9	9122.3	9594.5	5967.4	7982.1	17553.1	10561.4	13399.2	12827.9	10460.8	2617.6	2286.4	38118.6	1311	1169.7	23761.1	22977.6	4704.6
48	GI_39812410-S	NM_001007.3	RPS4X	Homo sapiens ribosomal protein S4, X-linked (RPS4X), mRNA.	go_component: cytosolic small ribosomal subunit (sensu Eukarya) [goid 0005843] [evidence TAS] [pmid 8358435]; go_component: ribosome [goid 0005840] [evidence IEA]; go_component: intracellular [goid 0005622] [evidence IEA]; go_function: structural protein of ribosome [goid 0003735] [evidence P]; go_function: RNA binding [goid 0003723] [evidence TAS] [pmid 8358435]; go_function: structural constitu…	11507.4	4664	5667.1	9713.3	11762.7	8559.7	9801.3	5564.7	7977.8	10928.6	12272.8	7257.1	5887	5170.5	34399.1	3650.6	3750.6	30208.3	18670.6	2583
49	GI_4503794-S	NM_002032.1	FTH1	Homo sapiens ferritin, heavy polypeptide 1 (FTH1), mRNA.	go_component: ferritin complex [goid 0008043] [evidence TAS] [pmid 6589621]; go_function: iron ion binding [goid 0005506] [evidence P] [pmid 3020541]; go_function: binding [goid 0005488] [evidence IEA]; go_function: ferric iron binding [goid 0008199] [evidence IEA]; go_process: intracellular iron ion storage [goid 0006880] [evidence TAS] [pmid 9924025]; go_process: iron ion homeostasis [goid 0006…	11919.6	2675.9	3193.3	6898.3	10529.7	4830.2	7419.9	13821.1	10491	12206.3	12361.8	10532.5	3381	2054.5	37186.7	1750	1332.3	22055.6	26573.4	6188.5
50	GI_15431299-S	NM_000980.2	RPL18A	Homo sapiens ribosomal protein L18a (RPL18A), mRNA.	go_component: cytosolic large ribosomal subunit (sensu Eukarya) [goid 0005842] [evidence TAS] [pmid 9582194]; go_component: ribosome [goid 0005840] [evidence IEA]; go_component: intracellular [goid 0005622] [evidence IEA]; go_function: structural protein of ribosome [goid 0003735] [evidence P] [pmid 9582194]; go_function: RNA binding [goid 0003723] [evidence TAS] [pmid 9582194]; go_function: stru…	10998.6	3342	3824	11276.2	12765.3	9899.6	9591.5	13673	12830.9	13702	16077.9	9842.4	2220	2112.7	25645	1632.4	1602.4	23820.1	16797.5	2683.2
51	GI_14141191-S	NM_005617.2	RPS14	Homo sapiens ribosomal protein S14 (RPS14), mRNA.	go_component: cytosolic small ribosomal subunit (sensu Eukarya) [goid 0005843] [evidence P] [pmid 3529092]; go_function: structural protein of ribosome [goid 0003735] [evidence P] [pmid 3529092]; go_function: RNA binding [goid 0003723] [evidence P] [pmid 3785212]; go_process: protein biosynthesis [goid 0006412] [evidence P] [pmid 3785212]	8756.6	4791.9	5606.8	10550.2	10429.4	10732.2	8030.4	12305	11451.5	11159.1	9707.1	6093.4	4681.3	3981.5	30051.9	2666.5	2500	28976.6	18688.2	2760.1
52	GI_38158004-A	NM_198125.1	TYROBP	Homo sapiens TYRO protein tyrosine kinase binding protein (TYROBP), transcript variant 2, mRNA.	go_component: integral to plasma membrane [goid 0005887] [evidence TAS] [pmid 9490415]; go_function: receptor signaling protein activity [goid 0005057] [evidence TAS] [pmid 9490415]; go_process: cellular defense response [goid 0006968] [evidence TAS] [pmid 9490415]; go_process: signal transduction [goid 0007165] [evidence E] [pmid 9490415]; go_process: intracellular signaling cascade [goid 000724…	14233.8	2131.8	2485.1	10081.7	12085.7	7989.1	12172.9	17366.3	12506.4	13632.3	17920.8	12536.8	4359.8	3767.7	21477.1	1746.8	1713.9	10501.3	19588.5	3543.6
53	GI_37620215-S	NM_198080.1	LOC253827	Homo sapiens hypothetical protein LOC253827 (LOC253827), mRNA.		9989.4	1708.1	2110.2	9029	9930.7	4842.7	7570.8	16846.3	9417.3	12226.5	10311.6	10551.9	1934.9	1235.9	46416.1	819.6	765.7	20351.2	20823.2	3746.9
54	GI_33386700-S	NM_182794.1	TMSL4	Homo sapiens thymosin-like 4 (TMSL4), mRNA.		10076	3660.2	4361.4	8233.4	11866.1	9089.1	7753.6	8384.7	13402.5	11702.6	13466.3	9141.3	5738.9	4480.6	24892.1	3108.9	2636.5	18396.7	21559	3579.7
55	GI_39725699-S	NM_014285.4	RRP4	Homo sapiens homolog of Yeast RRP4 (ribosomal RNA processing 4), 3'-5'-exoribonuclease (RRP4), mRNA.	go_component: exosome (RNase complex) [goid 0000178] [evidence IEA]; go_component: cytoplasm [goid 0005737] [evidence TAS] [pmid 8600032]; go_component: nucleus [goid 0005634] [evidence TAS] [pmid 8600032]; go_function: 7S RNA binding [goid 0008312] [evidence TAS] [pmid 8600032]; go_function: 3'-5' exoribonuclease activity [goid 0000175] [evidence TAS] [pmid 8600032]; go_function: exonuclease act…	10721.6	2247.1	2414.7	9068	9358.2	5047.5	7146.7	16838.4	8602.1	13952.1	9561.6	10055.5	1644.2	1664.2	42901.5	853.9	866.3	18086.1	17559.9	3286.4
56	GI_21389426-S	NM_144618.1	MGC29891	Homo sapiens hypothetical protein MGC29891 (MGC29891), mRNA.		9279.8	1883.7	1960	7664	9304.7	4285.8	7984.8	15990.1	9173.2	11725.8	10126	9779.3	2322.3	1388.3	45445.2	1025.2	822.6	17774.5	18030.3	3621.4
57	GI_37704380-S	NM_004048.2	B2M	Homo sapiens beta-2-microglobulin (B2M), mRNA.	go_function: amyloid protein [goid 0005208] [evidence TAS] [pmid 2413854]; go_function: MHC class I receptor activity [goid 0030106] [evidence IEA]; go_process: antigen presentation, endogenous antigen [goid 0019883] [evidence IEA]; go_process: antigen processing, endogenous antigen via MHC class I [goid 0019885] [evidence IEA]	8109.8	6160	6990.7	9184.5	9454	7239.3	7031.4	20528.5	10908	12050.1	9964.1	4970.8	6521.4	5576.9	14848.5	3655.7	3563.9	19610.9	19015.4	2459.5
58	GI_28274681-S	NM_006974.1	ZNF33A	Homo sapiens zinc finger protein 33a (KOX 31) (ZNF33A), mRNA.		9512.3	1234.6	1567.6	8284.3	9198.5	4067.2	6649.5	16427	8713.6	11902.2	10343.7	10053.3	1563.7	822.4	47198.4	637.8	496.2	17884.3	17731.5	3481.6
59	GI_30089938-S	NM_004486.3	GOLGA2	Homo sapiens golgi autoantigen, golgin subfamily a, 2 (GOLGA2), mRNA.	go_component: Golgi apparatus [goid 0005794] [evidence TAS] [pmid 8315394]; go_component: membrane [goid 0016020] [evidence IEA]	9193.3	2247	2559.4	5904.5	8113.8	3662.9	6188.6	15897.2	9409.1	13084.5	9644.8	10156.8	1484.1	771.7	45945.5	830.8	796.1	20769.5	15759.3	4603.6
60	GI_24233529-S	NM_153697.1	LOC91526	Homo sapiens hypothetical protein DKFZp434D2328 (LOC91526), mRNA.		9431	1388.8	1739.1	8095.1	9190.2	4007.4	5991.7	14771.6	9112.2	11408.5	9053.4	10013.4	1484.3	1090.2	46288.6	665.7	649.5	17900.3	17799.9	3431.2
61	GI_7662439-S	NM_014960.1	KIAA1001	Homo sapiens Arylsulfatase G (KIAA1001), mRNA.	go_function: sulfuric ester hydrolase activity [goid 0008484] [evidence IEA]; go_process: metabolism [goid 0008152] [evidence IEA]	8161.2	2505.9	2845.9	5924.9	8558.8	3577.8	6094.4	10767.6	10177.4	10770.5	11011.7	8833	3347.2	3000.2	34947.9	1719.4	1617	23545.5	21555.4	3491.1
62	GI_16306562-S	NM_000999.2	RPL38	Homo sapiens ribosomal protein L38 (RPL38), mRNA.	go_component: cytosolic large ribosomal subunit (sensu Eukarya) [goid 0005842] [evidence TAS] [pmid 9375793]; go_component: ribosome [goid 0005840] [evidence IEA]; go_component: intracellular [goid 0005622] [evidence IEA]; go_function: structural protein of ribosome [goid 0003735] [evidence P] [pmid 9375793]; go_function: RNA binding [goid 0003723] [evidence TAS] [pmid 9375793]; go_function: stru…	10142.3	2558.8	2923.6	7638.3	10826.3	9531.3	8299	9879.4	11401.9	10764.2	16342.6	9161.7	2949.4	2566.4	25941.6	1613.4	1763.9	19789.2	14690.9	3270.8
63	GI_27754195-S	NM_173710.1	MTND3	Homo sapiens NADH dehydrogenase 3 (MTND3), mRNA.	go_component: mitochondrial inner membrane [goid 0005743] [evidence P] [pmid 9878551]; go_component: respiratory chain complex I (sensu Eukarya) [goid 0005747] [evidence NAS]; go_component: mitochondrion [goid 0005739] [evidence IEA]; go_function: NADH dehydrogenase (ubiquinone) activity [goid 0008137] [evidence NAS] [pmid 9878551]; go_function: oxidoreductase activity [goid 0016491] [evidence IE…	10134.5	3184.8	3956.2	7699.9	10190.4	4708.9	8086.6	11816.3	6319.1	10309.5	13617.3	8861.8	2838.5	2512.1	35592.8	2128.9	2121	16281.8	16172	2614.3
64	GI_20149601-S	NM_012229.2	NT5C2	Homo sapiens 5'-nucleotidase, cytosolic II (NT5C2), mRNA.	go_component: cytosol [goid 0005829] [evidence NR]; go_function: 5'-nucleotidase activity [goid 0008253] [evidence TAS] [pmid 7999131]; go_function: hydrolase activity [goid 0016787] [evidence IEA]; go_function: IMP-GMP specific 5'-nucleotidase activity [goid 0017175] [evidence IEA]	9645.2	1239.8	1479.7	5450.4	8767	2610.5	6115.9	13041.1	11082	12445.3	11483.4	12175.2	2390.3	1578.9	35485.4	910.7	923.6	18504	19695.5	4021.7
65	GI_7662213-S	NM_014789.1	KIAA0628	Homo sapiens KIAA0628 gene product (KIAA0628), mRNA.		9821.2	1096.7	1248.2	8310.5	9445.8	4390.6	6695.3	14585.9	9144.2	11546.4	9582.2	11475.2	1332.2	788.3	39471.9	585.7	418.1	17526	17639.3	3925.8
66	GI_14249467-I	NM_032794.1	C6orf29	Homo sapiens chromosome 6 open reading frame 29 (C6orf29), mRNA.		8961.2	1502.6	1720.3	7938.3	9225.8	5076.8	6647.8	13894.7	7181.4	10153.9	9471.6	8808.5	1673.5	1500.8	42187	819.4	699.8	16879.8	18234.3	3338.2
67	GI_37539711-S	XM_351591.1	LOC375406	Homo sapiens similar to ENSANGP00000025329 (LOC375406), mRNA.		8822.5	2964.1	3651.5	9289.8	8010.4	6566.6	7567.4	11124.3	9077.1	10100.3	10421.9	7725.7	3523.9	2634.2	24678.4	2125.1	1928.8	22998.2	18948.5	2238.3
68	GI_19557676-S	NM_002117.3	HLA-C	Homo sapiens major histocompatibility complex, class I, C (HLA-C), mRNA.	go_component: integral to membrane [goid 0016021] [evidence IEA]; go_function: class I major histocompatibility complex antigen [goid 0003820] [evidence NR]; go_function: MHC class II receptor activity [goid 0045012] [evidence NAS]; go_process: immune response [goid 0006955] [evidence NAS]	10673.3	1386.7	1721.6	7267.4	11007	3442.6	8911.5	19539.4	10029.7	12303.2	11896.4	12496.3	3878.9	3047.9	27249.8	1077.8	980.9	8155.9	16288.2	2463.5
69	GI_13376851-S	NM_025240.1	B7H3	Homo sapiens B7 homolog 3 (B7H3), mRNA.	go_component: cellular_component unknown [goid 0008372] [evidence ND]; go_function: molecular_function unknown [goid 0005554] [evidence ND]; go_process: immune response [goid 0006955] [evidence NAS] [pmid 11224528]; go_process: cell proliferation [goid 0008283] [evidence NAS] [pmid 11224528]	7833.5	637	768.6	4967.4	15910.4	2943.9	6771.5	2529.6	13766.4	5884.7	17740.1	7864	1339.6	1035	37199.1	1328.5	1145.8	16502.9	21046.3	6365.4
70	GI_34147611-S	NM_024670.3	SUV39H2	Homo sapiens suppressor of variegation 3-9 homolog 2 (Drosophila) (SUV39H2), mRNA.	go_component: chromatin [goid 0005717] [evidence IEA]; go_component: nucleus [goid 0005634] [evidence IEA]; go_component: chromatin [goid 0000785] [evidence IEA]; go_function: methyltransferase activity [goid 0008168] [evidence IEA]; go_function: chromatin binding [goid 0003682] [evidence IEA]; go_function: transferase activity [goid 0016740] [evidence IEA]; go_function: histone-lysine N-methyltr…	8359.4	1948.8	2150.9	6791.6	7912.4	3096	5733.8	12641.5	8287.3	11277.8	9877	9113.2	2075.2	1572.7	38321.6	964.6	813	20544.8	18172.8	3649.8
71	GI_10864030-S	NM_021220.1	ZNF339	Homo sapiens zinc finger protein 339 (ZNF339), mRNA.	go_component: nucleus [goid 0005634] [evidence IEA]; go_function: DNA binding [goid 0003677] [evidence IEA]; go_process: regulation of transcription, DNA-dependent [goid 0006355] [evidence IEA]	8135.3	1404.6	1764.3	6877	7345.3	3118.2	5111.1	14399.7	9137	11586.5	8234.5	8574.5	1402.8	979.5	42969.5	528.1	523.3	17848.5	20363.6	2995.8
72	GI_36951011-S	NM_005279.2	GPR1	Homo sapiens G protein-coupled receptor 1 (GPR1), mRNA.	go_component: integral to plasma membrane [goid 0005887] [evidence TAS] [pmid 7851889]; go_function: G-protein coupled receptor activity [goid 0004930] [evidence P] [pmid 7851889]; go_function: G-protein coupled receptor activity, unknown ligand [goid 0016526] [evidence IEA]; go_function: rhodopsin-like receptor activity [goid 0001584] [evidence IEA]; go_process: G-protein coupled receptor protei…	9128.2	1749.7	2105.1	7229.4	7705.1	4369	6518	15049.9	6824.8	11558	8385	9373.8	1392.3	1111.5	44197.5	632.4	556.2	14038.4	15109.1	2614.6
73	GI_16753213-S	NM_005022.2	PFN1	Homo sapiens profilin 1 (PFN1), mRNA.	go_component: actin cytoskeleton [goid 0015629] [evidence IEA]; go_function: actin monomer binding [goid 0003785] [evidence NR]; go_process: cytoskeleton organization and biogenesis [goid 0007010] [evidence IEA]; go_process: actin cytoskeleton organization and biogenesis [goid 0030036] [evidence IEA]	12173.3	1636.6	1958.7	6894.8	10216.8	3448.3	9693.7	15602.2	8555	12753.6	9753.3	10109.5	2836.9	2723.7	26881.8	1334.5	1338.1	13778.5	14659.7	2833.5
74	GI_21327676-S	NM_005514.4	HLA-B	Homo sapiens major histocompatibility complex, class I, B (HLA-B), mRNA.	go_component: integral to plasma membrane [goid 0005887] [evidence NAS] [pmid 518865]; go_function: MHC class I receptor activity [goid 0030106] [evidence NAS] [pmid 518865]; go_process: immune response [goid 0006955] [evidence NAS] [pmid 518865]; go_process: antigen presentation, endogenous antigen [goid 0019883] [evidence IEA]; go_process: antigen processing, endogenous antigen via MHC class I …	8519.5	2614.8	2944.9	8285.7	12368.6	4028.3	7549.4	16712.9	5947.6	8439.4	10984.2	7478.6	4550.7	4160.6	21377	2787.9	2562.1	19717	15574	2402.8
75	GI_22042087-S	XM_087062.2	LOC150978	Homo sapiens similar to 60S acidic ribosomal protein P1 (LOC150978), mRNA.		8812	3136	3682.9	6495.7	8735.6	6753	7093.5	10113.8	8762.3	8558.7	9261.8	6812.5	3245.6	3045	21601.3	2239.6	2023.3	21950	20041.7	2274
76	GI_38454193-S	NM_014444.2	76P	Homo sapiens gamma tubulin ring complex protein (76p gene) (76P), mRNA.	go_component: centrosome [goid 0005813] [evidence TAS] [pmid 10562286]; go_component: microtubule cytoskeleton [goid 0015630] [evidence TAS] [pmid 10562286]; go_component: gamma-tubulin ring complex [goid 0008274] [evidence NAS] [pmid 10562286]; go_function: structural constituent of cytoskeleton [goid 0005200] [evidence NAS] [pmid 10562286]; go_process: microtubule nucleation [goid 0007020] [evi…	8663.6	1003	1167.7	6859.1	7482.2	3346.5	6019.2	15385.5	7171.3	11292.7	8741	10615.7	1235.2	541.5	39463.2	524	405.6	14449.6	15379.3	2819.8
77	GI_34222376-S	NM_182607.2	MGC44287	Homo sapiens hypothetical protein MGC44287 (MGC44287), mRNA.	go_component: membrane [goid 0016020] [evidence IEA]	7796	1048.1	1311.1	6474.3	9066.8	3695.7	6342	13720.4	7153.3	10218	8422.3	8799.5	1433.3	994.1	39045.3	605	596.3	15026	15173.2	2807.8
78	GI_4557784-S	NM_000265.1	NCF1	Homo sapiens neutrophil cytosolic factor 1 (47kDa, chronic granulomatous disease, autosomal 1) (NCF1), mRNA.	go_component: cytosol [goid 0005829] [evidence TAS] [pmid 2848318]; go_component: soluble fraction [goid 0005625] [evidence TAS] [pmid 2848318]; go_function: GTPase activity [goid 0003924] [evidence TAS] [pmid 2547247]; go_function: GTP binding [goid 0005525] [evidence TAS] [pmid 2848318]; go_function: protein binding [goid 0005515] [evidence TAS] [pmid 2848318]; go_function: electron transporter…	13405.2	1363.4	1580.3	8304.7	14113.8	5545.7	11882.1	13317.3	7612.9	10035.8	10657.4	7473.2	1935.1	1804.3	26094.7	1063.1	1071.3	5616.8	14255.6	1887.3
79	GI_21614516-A	NM_016815.2	GYPC	Homo sapiens glycophorin C (Gerbich blood group) (GYPC), transcript variant 2, mRNA.	go_component: integral to plasma membrane [goid 0005887] [evidence TAS] [pmid 2416746]; go_component: plasma membrane [goid 0005886] [evidence NR]; go_function: blood group antigen [goid 0005555] [evidence NR]; go_process: N-linked glycosylation [goid 0006487] [evidence TAS] [pmid 2416746]; go_process: regulation of cell shape [goid 0008360] [evidence P]; go_process: O-linked glycosylation [goid …	7105.4	2468	2850.7	5400.8	8164.6	4758.3	5413.1	4169.5	10674.4	5802.3	6920.4	5531.9	3390.1	3317.1	26843	3307.9	3404.7	25160.5	17878.1	6263.4
80	GI_27754203-S	NM_173704.1	MTCO1	Homo sapiens cytochrome c oxidase I (MTCO1), mRNA.	go_component: mitochondrial electron transport chain [goid 0005746] [evidence IEA]; go_component: integral to membrane [goid 0016021] [evidence IEA]; go_component: inner membrane [goid 0019866] [evidence IEA]; go_component: mitochondrion [goid 0005739] [evidence IEA]; go_function: aa3-type cytochrome c oxidase [goid 0009481] [evidence IEA]; go_function: cytochrome-c oxidase activity [goid 0004129…	8207.8	3445.2	3910.8	5878	5805	3513.4	7457.5	7652.9	5476	7219.1	10499.9	6616.7	4248.3	3272.4	25602.2	2579	2349.7	19338.6	21324.6	1929.9
81	GI_25453469-S	NM_001402.4	EEF1A1	Homo sapiens eukaryotic translation elongation factor 1 alpha 1 (EEF1A1), mRNA.	go_component: eukaryotic translation elongation factor 1 complex [goid 0005853] [evidence P] [pmid 2564392]; go_component: cytoplasm [goid 0005737] [evidence P] [pmid 3512269]; go_function: GTP binding [goid 0005525] [evidence P] [pmid 3512269]; go_process: translational elongation [goid 0006414] [evidence P] [pmid 8812466]; go_process: regulation of cell shape [goid 0008360] [evidence P]; go_pro…	5683.8	4088.3	4730.8	7054.2	7997.8	4026.3	5067.9	11149.9	10495	7952.9	10042.8	4196.3	4444.9	3824.2	10585.2	2517.1	2336.2	28022.8	16265.6	1807.1
82	GI_42476331-S	NM_031286.2	SH3BGRL3	Homo sapiens SH3 domain binding glutamic acid-rich protein like 3 (SH3BGRL3), mRNA.	go_component: nucleus [goid 0005634] [evidence IEA]	8171.6	2560.6	2838.4	4561.3	7998.4	3020.9	7577.4	9163.9	7213.2	10567.3	8957.3	8007.4	3291.9	2984.6	31327.2	1701.2	1740.2	11757	15247.6	3072
83	GI_15451941-S	NM_003333.2	UBA52	Homo sapiens ubiquitin A-52 residue ribosomal protein fusion product 1 (UBA52), mRNA.	go_component: cytoplasm [goid 0005737] [evidence NR]; go_component: nucleus [goid 0005634] [evidence NR]; go_component: ribosome [goid 0005840] [evidence IEA]; go_function: ubiquitin [goid 0005551] [evidence TAS] [pmid 2581967]; go_function: structural constituent of ribosome [goid 0003735] [evidence IEA]; go_process: protein modification [goid 0006464] [evidence TAS] [pmid 2581967]; go_process: …	4710.5	1572.3	1865.5	4349.7	16646.1	7298.8	3611.9	11266.4	13720.2	10055	5910	9970.1	4327.3	4163.7	21006.3	1855.3	1936.7	10780.8	11584.5	4724.5
84	GI_41107699-S	XM_372773.1	LOC391023	Homo sapiens similar to ribosomal protein L18a; 60S ribosomal protein L18a (LOC391023), mRNA.		6871.5	2788.2	3231.1	6662.3	6608.7	5941.6	5080.1	9801.4	8611.2	7964.6	7379.7	6012.9	2355.8	2276.9	26090.3	1679.2	1754.4	19487.2	18862.5	1542.1
85	GI_20149305-S	NM_021009.1	UBC	Homo sapiens ubiquitin C (UBC), mRNA.	DNA	9184.8	1916.5	2123.2	6819.5	9470.1	3771.8	6180.2	14526.8	9551.9	10343.4	11002.1	9198	1929.2	1250.9	15920.3	1145.8	864.6	15998.4	15100.6	3207.2
86	GI_17158042-S	NM_000981.2	RPL19	Homo sapiens ribosomal protein L19 (RPL19), mRNA.	go_component: cytosolic large ribosomal subunit (sensu Eukarya) [goid 0005842] [evidence TAS] [pmid 1577483]; go_component: ribosome [goid 0005840] [evidence IEA]; go_component: intracellular [goid 0005622] [evidence IEA]; go_function: structural protein of ribosome [goid 0003735] [evidence P] [pmid 1577483]; go_function: RNA binding [goid 0003723] [evidence TAS] [pmid 1577483]; go_function: stru…	6887.5	2854.7	3532.7	5565.4	7057.9	3719.7	5910.7	6879.1	7336.1	6817.8	12097	5588.9	4884.3	3765.9	21699.8	3060.1	2297.3	19104	15176	1505.7
87	GI_16905512-S	NM_001004.2	RPLP2	Homo sapiens ribosomal protein, large P2 (RPLP2), mRNA.	go_component: cytosolic large ribosomal subunit (sensu Eukarya) [goid 0005842] [evidence TAS] [pmid 3323886]; go_component: ribosome [goid 0005840] [evidence IEA]; go_component: intracellular [goid 0005622] [evidence IEA]; go_function: structural protein of ribosome [goid 0003735] [evidence E] [pmid 3323886]; go_function: RNA binding [goid 0003723] [evidence TAS] [pmid 3323886]; go_function: stru…	6371.4	2538.8	2976.6	5483.9	6476.7	4176.1	5340.1	6285.1	8331.1	6284.3	10331.9	7520.4	3266.4	3189.1	23029.8	1990	1970.1	21380.8	15654.6	1981.9
88	GI_15812220-S	NM_000994.2	RPL32	Homo sapiens ribosomal protein L32 (RPL32), mRNA.	go_component: cytosolic large ribosomal subunit (sensu Eukarya) [goid 0005842] [evidence NR]; go_component: ribosome [goid 0005840] [evidence IEA]; go_component: intracellular [goid 0005622] [evidence IEA]; go_function: structural protein of ribosome [goid 0003735] [evidence NR]; go_function: RNA binding [goid 0003723] [evidence NR]; go_function: structural constituent of ribosome [goid 0003735] …	6500	2840.3	2811.3	6714.1	8097.8	5242.9	5475.4	10513.3	8789.3	9563.3	7048.6	5810.1	2900.9	2164.9	23987.4	1703.6	1367.9	17833.5	12173.2	1946.9
89	GI_16905511-S	NM_001003.2	RPLP1	Homo sapiens ribosomal protein, large, P1 (RPLP1), mRNA.	go_component: cytosolic large ribosomal subunit (sensu Eukarya) [goid 0005842] [evidence TAS] [pmid 3323886]; go_component: ribosome [goid 0005840] [evidence IEA]; go_component: intracellular [goid 0005622] [evidence IEA]; go_function: structural protein of ribosome [goid 0003735] [evidence E] [pmid 3323886]; go_function: RNA binding [goid 0003723] [evidence TAS] [pmid 3323886]; go_function: stru…	7700.6	2534.2	2897.8	5587.7	8610.8	5428.6	6388.1	10752	8833.6	8750.5	9898.2	6509.7	2370.4	2352	19130.3	1377.8	1446.8	15836.9	14875.1	2122.2
90	GI_10863874-S	NM_021104.1	RPL41	Homo sapiens ribosomal protein L41 (RPL41), mRNA.	go_component: cytosolic large ribosomal subunit (sensu Eukarya) [goid 0005842] [evidence TAS] [pmid 1326959]; go_function: structural protein of ribosome [goid 0003735] [evidence P] [pmid 1326959]; go_function: RNA binding [goid 0003723] [evidence TAS] [pmid 1326959]; go_function: structural constituent of ribosome [goid 0003735] [evidence TAS] [pmid 1326959]; go_process: protein biosynthesis [go…	4017.4	3102	3902.9	6239.2	7230.7	4872	3562.8	15460.9	10241.9	8634.6	5981.3	2412.5	3257.1	3025.5	13516.9	1829.3	1775.5	23886.8	15346.5	2949.1
91	GI_21359905-S	NM_015710.2	GLTSCR2	Homo sapiens glioma tumor suppressor candidate region gene 2 (GLTSCR2), mRNA.	go_function: tumor suppressor [goid 0008181] [evidence P] [pmid 10708517]	7795.8	2244.1	2672.9	7737.3	8601	4065.1	6935	8460.1	8264.7	8916.8	7166	5907.2	2547.9	2400.2	23656.7	1524.3	1470.5	15730	11275	1666.3
92	GI_33469925-A	NM_032485.4	MCM8	Homo sapiens MCM8 minichromosome maintenance deficient 8 (S. cerevisiae) (MCM8), transcript variant 1, mRNA.	go_function: DNA dependent ATPase activity [goid 0008094] [evidence IEA]; go_function: nucleotide binding [goid 0000166] [evidence IEA]; go_function: ATP binding [goid 0005524] [evidence IEA]; go_function: DNA binding [goid 0003677] [evidence IEA]; go_process: cell cycle [goid 0007049] [evidence IEA]; go_process: DNA replication [goid 0006260] [evidence IEA]; go_process: DNA replication initiatio…	6006.6	1282.4	1493.3	5298.2	5838.3	2501.2	4769.7	11312.3	6154.9	8059.9	6411.4	6287.6	1319.8	916.6	36323	499.9	496.2	15279.8	15231.9	2097
93	GI_37559950-S	XM_032997.4	MICAL3	Homo sapiens flavoprotein oxidoreductase MICAL3 (MICAL3), mRNA.		6149.2	1150.7	1401	5676	6493.6	2758	4420	12340.9	6070.8	8009.3	7044.3	7304.2	1252.2	728.1	35874.9	503.5	400.9	12316.3	12433.3	2622.4
94	GI_4505248-S	NM_002439.1	MSH3	Homo sapiens mutS homolog 3 (E. coli) (MSH3), mRNA.	go_function: damaged DNA binding [goid 0003684] [evidence IEA]; go_function: ATP binding [goid 0005524] [evidence IEA]; go_process: mismatch repair [goid 0006298] [evidence TAS] [pmid 8782829]; go_process: DNA repair [goid 0006281] [evidence NR]; go_process: oncogenesis [goid 0007048] [evidence TAS] [pmid 8782829]	6024.1	1116.5	1329.3	4522.6	5962.7	2223.9	4050	8980.9	7664.3	8860.2	8022.8	6940.7	1690.9	1364.1	29793	790.9	722.6	16189.8	13014.3	3012.2
95	GI_15011937-S	NM_001030.2	RPS27	Homo sapiens ribosomal protein S27 (metallopanstimulin 1) (RPS27), mRNA.	go_component: ribosome [goid 0005840] [evidence IEA]; go_component: intracellular [goid 0005622] [evidence IEA]; go_component: cytosolic small ribosomal subunit (sensu Eukarya) [goid 0005843] [evidence TAS] [pmid 8908372]; go_function: structural protein of ribosome [goid 0003735] [evidence P] [pmid 8908372]; go_function: RNA binding [goid 0003723] [evidence TAS] [pmid 8908372]; go_function: zinc…	5258.6	2037.3	2448.5	7189.8	7923.6	5635.9	4504	19680	10941.6	10453.4	8850.1	2361.8	2473.2	1963.2	11120.2	1036.3	940.9	16164.1	8591.4	2364.9
96	GI_5803186-S	NM_006755.1	TALDO1	Homo sapiens transaldolase 1 (TALDO1), mRNA.	go_component: cytoplasm [goid 0005737] [evidence IEA]; go_function: transaldolase activity [goid 0004801] [evidence TAS] [pmid 9524206]; go_function: transferase activity [goid 0016740] [evidence IEA]; go_function: aldolase activity [goid 0016228] [evidence IEA]; go_process: carbohydrate metabolism [goid 0005975] [evidence TAS] [pmid 9524206]; go_process: pentose-phosphate shunt [goid 0006098] [e…	8452.4	2157	2453.8	5437.7	7768.7	3831.8	7640.4	9288.1	6170	5818.2	8577.7	5108.8	3350.6	3210	18028.6	1507.7	1451.4	13693.8	14597.4	3235.1
97	GI_41203790-S	XM_370772.1	LOC388007	Homo sapiens similar to protease inhibitor (LOC388007), mRNA.		5342.2	849.5	1059.6	5196.1	10736.9	3324.6	4093.2	2383.1	9280.2	3910.1	5796.2	4633.7	1526	811.3	22887	1206	1135	21998.3	19633	3977.4
98	GI_4507868-S	NM_003370.1	VASP	Homo sapiens vasodilator-stimulated phosphoprotein (VASP), mRNA.	go_component: focal adhesion [goid 0008357] [evidence E] [pmid 7828592]; go_component: actin cytoskeleton [goid 0015629] [evidence TAS] [pmid 7828592]; go_function: actin binding [goid 0003779] [evidence IEA]; go_process: cell motility [goid 0006928] [evidence NR]; go_process: cell shape and cell size control [goid 0007148] [evidence NR]	9189.8	1582.8	1784.4	5838.2	8924.3	3253	6850.5	13171	5361.1	7917.8	6745.6	6376.9	2323.5	2211.9	18442.7	777.4	787.1	11216.3	14639.8	2367.9
99	GI_34147705-S	NM_145042.2	MGC16703	Homo sapiens alpha tubulin-like (MGC16703), mRNA.	go_component: microtubule [goid 0005874] [evidence IEA]; go_function: GTP binding [goid 0005525] [evidence IEA]; go_function: structural molecule activity [goid 0005198] [evidence IEA]; go_process: microtubule-based movement [goid 0007018] [evidence IEA]	6194.7	950.4	1057.5	3543.2	5502.4	1888.7	4158.4	10277.1	7001.7	9971.2	8298.3	7194.9	1262.4	1071.7	33741.6	525.5	548.2	12212.8	11429.1	2376.8
100	GI_18765737-A	NM_014006.2	SMG1	Homo sapiens PI-3-kinase-related kinase SMG-1 (SMG1), transcript variant 2, mRNA.	go_function: inositol/phosphatidylinositol kinase activity [goid 0004428] [evidence IEA]	6408.9	1311	1422.3	3870.3	5843.1	2325.5	3759.6	10067.2	7940.8	8138.9	8426.3	7060.2	1407.3	1399.4	27455.1	770.9	720	13913.3	13506	3027.7
101	GI_31543813-S	NM_021103.2	TMSB10	Homo sapiens thymosin, beta 10 (TMSB10), mRNA.	go_component: cytoskeleton [goid 0005856] [evidence IEA]; go_function: actin modulating activity [goid 0003790] [evidence TAS] [pmid 1744129]; go_process: spermatid development [goid 0007286] [evidence TAS] [pmid 1744129]; go_process: cytoskeleton organization and biogenesis [goid 0007010] [evidence IEA]	6283	2018.6	2570.9	6217.2	7056.5	5186.6	5520.1	8021.1	7782.7	8170.5	6673.7	4500.9	3607.6	3228.1	19457.5	2088.4	1908	14861.7	11809.3	1615
102	GI_27437044-A	NM_172313.1	CSF3R	Homo sapiens colony stimulating factor 3 receptor (granulocyte) (CSF3R), transcript variant 4, mRNA.	go_component: integral to plasma membrane [goid 0005887] [evidence TAS] [pmid 7542747]; go_function: receptor activity [goid 0004872] [evidence TAS] [pmid 7542747]; go_function: hematopoietin/interferon-class (D200-domain) cytokine receptor activity [goid 0004896] [evidence IEA]; go_function: cell adhesion molecule activity [goid 0005194] [evidence IEA]; go_process: defense response [goid 0006952…	7072.7	2487	2824.1	5181.9	7840.8	3212.4	5958.8	10855.1	5115.1	5907.5	6878	6143.2	3406.5	2671.8	17446.6	1682.2	1730.8	10968.5	17113.4	1962.1
103	GI_37541551-S	XM_352178.1	LOC376348	Homo sapiens similar to 60S ribosomal protein L10 (QM protein homolog) (LOC376348), mRNA.		6713.1	2267.3	2759.3	5060.9	6247.3	3650.6	5016.7	10441.9	6454.1	8374.4	7034.6	6828.1	2320.4	2137.8	20920.7	1267.9	1287.6	13375.4	11986.3	1709.6
104	GI_9845501-S	NM_002295.2	LAMR1	Homo sapiens laminin receptor 1 (ribosomal protein SA, 67kDa) (LAMR1), mRNA.	go_component: laminin receptor protein [goid 0005613] [evidence NR]; go_component: intracellular [goid 0005622] [evidence IEA]; go_component: cytosolic small ribosomal subunit (sensu Eukarya) [goid 0005843] [evidence NR]; go_component: integral to plasma membrane [goid 0005887] [evidence NR]; go_component: integrin complex [goid 0008305] [evidence NR]; go_function: laminin receptor activity [goid…	6043	2349.3	2842.8	5603.7	6143.4	4052.8	4954	8917.1	8498	9099.5	7464.7	4177.7	2637.6	2497.5	16239.1	1673.3	1477.2	16825.9	12841.1	1481.7
105	GI_22748992-S	NM_152475.1	MGC34079	Homo sapiens hypothetical protein MGC34079 (MGC34079), mRNA.	go_component: intracellular [goid 0005622] [evidence IEA]; go_function: nucleic acid binding [goid 0003676] [evidence IEA]; go_process: regulation of transcription, DNA-dependent [goid 0006355] [evidence IEA]	7887.5	779.3	921.7	4165.9	6006	1799.7	4552.7	12392.3	6153.1	10866.6	7395.3	8261.8	1051.6	927.4	27039.7	460.5	484.1	11959.8	10299.8	2247.2
106	GI_41584203-S	NM_198066.2	GNPNAT1	Homo sapiens glucosamine-phosphate N-acetyltransferase 1 (GNPNAT1), mRNA.	go_function: N-acetyltransferase activity [goid 0008080] [evidence IEA]; go_function: transferase activity [goid 0016740] [evidence IEA]	5303.5	1705.8	1933.5	4042.5	5975	2143.2	3751	7761	6622.7	7258.4	6968.4	6436.7	2114.9	1764.3	27650.1	1103.4	1010.9	15893.9	13591.2	2509.1
107	GI_8923014-S	NM_017618.1	FLJ20006	Homo sapiens hypothetical protein FLJ20006 (FLJ20006), mRNA.		5639.4	939.3	1292.4	5481	6815.7	3125.5	3346.1	11012.8	5778.4	8414.7	6077.9	6919.5	1042.9	589.2	31328.6	377.9	397.7	11327.7	11461.3	2165
108	GI_27734690-S	NM_173669.1	FLJ34047	Homo sapiens hypothetical protein FLJ34047 (FLJ34047), mRNA.		6029.6	667.8	882.3	4083.8	5058	1993	3709.1	11455.3	5479.4	8918.6	5806	7218.7	779.8	394.3	33536.2	345.3	291.5	11353.9	10607.9	2567.3
109	GI_24475893-S	NM_006098.2	GNB2L1	Homo sapiens guanine nucleotide binding protein (G protein), beta polypeptide 2-like 1 (GNB2L1), mRNA.	go_component: peripheral plasma membrane protein [goid 0000157] [evidence P] [pmid 2499885]; go_function: protein kinase C binding [goid 0005080] [evidence TAS] [pmid 8302854]; go_function: heterotrimeric G-protein [goid 0005065] [evidence TAS] [pmid 2499885]; go_process: protein kinase C activation [goid 0007205] [evidence TAS] [pmid 8302854]; go_process: signal transduction [goid 0007165] [evid…	6519.6	2567.8	2929.6	4597.6	7313	3214.4	5096.6	6364.7	7743.7	6088.2	9513.6	4977.8	2741.5	2410.5	15583.4	1514.2	1420.8	15276	12984.1	1547.2
110	GI_25453471-A	NM_001960.2	EEF1D	Homo sapiens eukaryotic translation elongation factor 1 delta (guanine nucleotide exchange protein) (EEF1D), transcript variant 2, mRNA.	go_component: eukaryotic translation elongation factor 1 complex [goid 0005853] [evidence P] [pmid 8334168]; go_function: translation factor activity, nucleic acid binding [goid 0008135] [evidence P] [pmid 8334168]; go_function: guanyl-nucleotide exchange factor activity [goid 0005085] [evidence NR]	7188.1	1834.8	2166.3	6886.5	6377.5	4321.1	5999.7	8759.7	6286.3	8183.9	6091.1	5128.6	2025.6	2050.2	21940.9	1143.7	1090.2	11613.1	9173.9	1885.1
111	GI_27754205-S	NM_173705.1	MTCO2	Homo sapiens cytochrome c oxidase II (MTCO2), mRNA.	go_component: mitochondrial electron transport chain [goid 0005746] [evidence IEA]; go_component: integral to membrane [goid 0016021] [evidence IEA]; go_component: inner membrane [goid 0019866] [evidence IEA]; go_component: mitochondrion [goid 0005739] [evidence IEA]; go_function: aa3-type cytochrome c oxidase [goid 0009481] [evidence IEA]; go_function: cytochrome-c oxidase activity [goid 0004129…	6032	2380.4	2760.6	4087	5926.8	2401.5	5582.7	6541.6	4688.3	6532	7725.8	4906.1	2543.8	1705.8	24707.7	1762.5	1533.7	13300.3	13268.8	1415.6
112	GI_42661184-S	XM_375471.1	KIAA0924	Homo sapiens KIAA0924 protein (KIAA0924), mRNA.		5929.4	1274.6	1475.5	5158	5772.9	2692.6	4221.9	10399.3	4706.6	7855.5	5678.5	5999.5	918.7	857.9	32526.5	428.4	412.3	10286.5	9907.5	1929
113	GI_27502389-S	NM_001562.2	IL18	Homo sapiens interleukin 18 (interferon-gamma-inducing factor) (IL18), mRNA.	go_component: extracellular [goid 0005576] [evidence TAS] [pmid 11598150]; go_function: cytokine activity [goid 0005125] [evidence P] [pmid 8666798]; go_function: signal transducer activity [goid 0004871] [evidence TAS] [pmid 8999896]; go_function: interleukin-1 receptor binding [goid 0005149] [evidence IEA]; go_function: apoptosis activator activity [goid 0016506] [evidence ISS] [pmid 11714750];…	5658.5	831.4	1019.3	3965.1	5734.5	1554.2	4131.2	11054.5	5594.2	8513.6	5533.1	7103.7	829.9	388.7	34222	384.4	341.2	9287.3	8795.5	2278.9
114	GI_37538660-S	XM_291241.3	IPLA2(GAMMA)	Homo sapiens intracellular membrane-associated calcium-independent phospholipase A2 gamma (IPLA2(GAMMA)), mRNA.		6547.4	854.8	959.3	5526.5	5968.8	2827.8	4440.3	10020.5	4952.8	7750.1	6182.3	6668	908.6	674.4	29496.8	407.6	323	9859.9	10104.8	2296.6
115	GI_21359983-S	NM_003651.3	CSDA	Homo sapiens cold shock domain protein A (CSDA), mRNA.	go_component: perinuclear space [goid 0005653] [evidence E] [pmid 7628487]; go_component: cytoplasm [goid 0005737] [evidence E] [pmid 7628487]; go_function: double-stranded DNA binding [goid 0003690] [evidence E] [pmid 2977358]; go_function: transcription co-repressor activity [goid 0003714] [evidence E] [pmid 8710501]; go_function: RNA polymerase II transcription factor activity [goid 0003702] […	5186	3619.1	4316.6	3889.1	5811.4	3935.3	4351.2	3927.4	4700.4	3965.3	4237.4	3178.7	2500.8	2233.5	11213.1	1837.1	1686.4	19048.6	18987	6171.5
116	GI_37552572-S	XM_047550.3	KIAA1473	Homo sapiens KIAA1473 protein (KIAA1473), mRNA.		6354.6	934.4	1118	5165.3	5549.3	2851.1	4024.4	10826.8	5051.2	7676.5	5586.7	6539.4	952.7	711.5	27546.4	423.8	335.4	10372	10619.8	2037.2
117	GI_16117795-A	NM_033643.1	RPL36	Homo sapiens ribosomal protein L36 (RPL36), transcript variant 1, mRNA.	go_component: cytosolic large ribosomal subunit (sensu Eukarya) [goid 0005842] [evidence NAS]; go_component: ribosome [goid 0005840] [evidence IEA]; go_component: intracellular [goid 0005622] [evidence IEA]; go_function: structural constituent of ribosome [goid 0003735] [evidence NAS]; go_process: protein biosynthesis [goid 0006412] [evidence NAS]	5908.2	1413.9	1691.9	3967.2	4777.9	2846.5	4525.2	7499.6	5728.7	7659.7	6786.9	6509.8	1980.7	1758.1	24031.5	1066.8	1038.8	12517.4	10997.5	1350.1
118	GI_16306561-S	NM_000998.2	RPL37A	Homo sapiens ribosomal protein L37a (RPL37A), mRNA.	go_component: cytosolic large ribosomal subunit (sensu Eukarya) [goid 0005842] [evidence NR]; go_component: ribosome [goid 0005840] [evidence IEA]; go_component: intracellular [goid 0005622] [evidence IEA]; go_function: structural protein of ribosome [goid 0003735] [evidence NR]; go_function: RNA binding [goid 0003723] [evidence NR]; go_function: structural constituent of ribosome [goid 0003735] …	7189.9	1651.3	1808.5	5184.1	6012	4573.5	5993.3	6282	4824	5014.8	8330.2	5109.9	1818.2	1579.3	19350.6	969	960.7	13033.2	9101.2	1347.6
119	GI_19923854-S	NM_032796.2	SYAP1	Homo sapiens synapse associated protein 1, SAP47 homolog (Drosophila) (SYAP1), mRNA.		5155.3	1126.4	1505	3931.7	5696.4	2069.1	3959.8	8547.8	4474.4	7052.8	6338.4	5826.5	1130	906.7	27327.4	624.5	570.1	10806.6	9920.4	2157.5
120	GI_41202045-S	XM_370684.1	LOC387845	Homo sapiens similar to Elongation factor 1-alpha 1 (EF-1-alpha-1) (Elongation factor 1 A-1) (eEF1A-1) (Elongation factor Tu) (EF-Tu) (LOC387845), mRNA.		4370.1	2244.7	2245.2	5725.2	5481.5	2812.7	4170.3	10180.4	7301.1	7004.9	7808.6	3806	2396.9	1241.9	9961.7	1273.6	731.6	17541.8	10987.8	1504.5
121	GI_24475700-S	NM_030898.2	FLJ21673	Homo sapiens hypothetical protein FLJ21673 (FLJ21673), mRNA.		5543.7	729.2	956	5203.3	5630	3374.3	3751.4	9763.9	5053.8	6699.5	5496	6260.5	732.3	606.2	26174.1	347.7	301	9735.5	9244.5	2180.9
122	GI_33386698-S	NM_182792.1	TMSL1	Homo sapiens thymosin-like 1 (TMSL1), mRNA.		5166.4	1115.6	1408.6	4158.2	6078.3	4252	3665.7	5789.7	8401	7792.2	8453.7	6584.5	2230.1	852.6	21048.5	999.2	853	5101	10625.2	1916.3
123	GI_13904869-S	NM_001009.2	RPS5	Homo sapiens ribosomal protein S5 (RPS5), mRNA.	go_component: cytosolic small ribosomal subunit (sensu Eukarya) [goid 0005843] [evidence TAS] [pmid 7772601]; go_component: intracellular [goid 0005622] [evidence IEA]; go_function: structural protein of ribosome [goid 0003735] [evidence P] [pmid 7772601]; go_function: RNA binding [goid 0003723] [evidence TAS] [pmid 7772601]; go_function: structural constituent of ribosome [goid 0003735] [evidenc…	5924.9	1515.7	1790.6	5567	5827.9	3807	5003.7	7657.9	5424.5	7124.9	5802.6	4539.1	1437.8	1271.4	18829	790.8	800.9	12008.7	8762.2	1196.8
124	GI_7706149-A	NM_016612.1	MSCP	Homo sapiens mitochondrial solute carrier protein (MSCP), mRNA.		4644.1	2728.5	3339.8	3248	4531.8	3194.1	4314.8	2885.5	4624	3537.7	5039.1	2669.2	3732.2	3513.1	16025.8	3084.9	2865.8	14110.2	11717.1	4985.3
125	GI_25453475-S	NM_001404.3	EEF1G	Homo sapiens eukaryotic translation elongation factor 1 gamma (EEF1G), mRNA.		5032.1	2805.8	3136.8	5780.1	4850.3	3734.2	3942.3	6495.1	5486.8	5781.4	4988	3897.7	1760.8	1884.3	18672.1	1291.1	1213.9	11941.3	9980.3	1098.1
126	GI_7705420-S	NM_016371.1	HSD17B7	Homo sapiens hydroxysteroid (17-beta) dehydrogenase 7 (HSD17B7), mRNA.	go_function: estradiol 17-beta-dehydrogenase activity [goid 0004303] [evidence P] [pmid 10544267]; go_function: tumor suppressor [goid 0008181] [evidence P] [pmid 10544267]	5954.1	647.2	774.9	3228.6	5043.5	1577	3584.4	9120.7	5126.7	7466.7	6674.6	6361.1	945.5	654	24797.9	426.3	384.9	9246.8	9173.4	2126.8
127	GI_17454506-S	XM_063202.1	LOC122585	Homo sapiens similar to 60S ribosomal protein L23a (LOC122585), mRNA.		5192.8	1781.4	2021.8	4029.3	4498.7	2812.5	3694.2	3868.7	5745.8	5905.2	6114.2	5435	1976.8	1792.6	19080.4	1472.7	1299.2	14571.4	10069.5	1211
128	GI_9845514-I	NM_002961.2	S100A4	Homo sapiens S100 calcium binding protein A4 (calcium protein, calvasculin, metastasin, murine placental homolog) (S100A4), transcript variant 1, mRNA.	go_function: calcium ion binding [goid 0005509] [evidence TAS] [pmid 8204608]; go_process: invasive growth [goid 0007125] [evidence NR]	7883.9	1209.6	1390.1	4134.1	6288.6	2775.3	6570.5	8469.4	6465.8	6901.2	6453.8	5807.4	1279.7	1159.2	10826.8	529.4	492.4	9226.3	12091.7	1750
129	GI_15011938-S	NM_001031.2	RPS28	Homo sapiens ribosomal protein S28 (RPS28), mRNA.	go_component: cytosolic small ribosomal subunit (sensu Eukarya) [goid 0005843] [evidence TAS] [pmid 1679328]; go_component: ribosome [goid 0005840] [evidence IEA]; go_component: intracellular [goid 0005622] [evidence IEA]; go_function: structural protein of ribosome [goid 0003735] [evidence P] [pmid 1679328]; go_function: RNA binding [goid 0003723] [evidence TAS] [pmid 1679328]; go_function: stru…	5393.3	1548.1	1742.4	4463.8	4828.8	3931.2	4228.9	4609	5149.1	5393	7402.8	4601.3	2452.7	2381.5	18655.6	1439.2	1447.8	11266.1	8982.1	1213.6
130	GI_42659631-S	XM_378321.1	LOC399972	Homo sapiens hypothetical gene supported by AK096370 (LOC399972), mRNA.		5090.8	869.5	974	4088.7	4617.5	1894.5	3625.4	9685.4	4692.7	7231.2	4870.5	5993.9	684.4	542.9	23511.4	313.6	323.6	8778.6	7996.3	1984.9
131	GI_31088849-S	NM_181428.1	TMSL6	Homo sapiens thymosin-like 6 (TMSL6), mRNA.	go_component: cytoplasm [goid 0005737] [evidence IEA]; go_function: actin binding [goid 0003779] [evidence IEA]; go_process: cytoskeleton organization and biogenesis [goid 0007010] [evidence IEA]	3156.8	564.7	759	5239.2	6742.8	4203.6	1863.5	8447.3	7857.9	5991.3	6922.3	6186.7	956.3	190.9	11563.7	520.1	341.8	13337.8	10092.3	2556.9
132	GI_8923629-S	NM_017932.1	FLJ20700	Homo sapiens hypothetical protein FLJ20700 (FLJ20700), mRNA.		5099.5	505.8	595.4	2965.7	4486.9	1163.4	3564	9499.7	4710.5	7690.6	6170.8	7203.2	699.5	618.9	25611	295.9	310.4	6966.7	7153.8	1780.7
133	GI_6005763-S	NM_007278.1	GABARAP	Homo sapiens GABA(A) receptor-associated protein (GABARAP), mRNA.	go_component: plasma membrane [goid 0005886] [evidence TAS] [pmid 9892355]; go_function: tubulin binding [goid 0015631] [evidence TAS] [pmid 9892355]; go_function: receptor activity [goid 0004872] [evidence IEA]; go_process: protein targeting [goid 0006605] [evidence TAS] [pmid 9892355]; go_process: synaptic transmission [goid 0007268] [evidence TAS] [pmid 9892355]; go_process: cell shape and cel…	4439.1	1758.7	2008.9	3342.4	4688	2365.1	3964.6	6224.5	4472.9	4558.5	6023.5	3954.5	2602.7	2517.8	14402.7	1253.9	1181.8	11156.1	13626.3	2303.1
134	GI_34147557-S	NM_005583.3	LYL1	Homo sapiens lymphoblastic leukemia derived sequence 1 (LYL1), mRNA.	go_component: nucleus [goid 0005634] [evidence IEA]; go_function: DNA binding [goid 0003677] [evidence TAS] [pmid 2752424]; go_process: oncogenesis [goid 0007048] [evidence TAS] [pmid 2067848]; go_process: cell growth and/or maintenance [goid 0008151] [evidence IEA]; go_process: regulation of transcription, DNA-dependent [goid 0006355] [evidence IEA]	5834.5	1415.9	1516.9	6305.7	5022	6176.1	5122.5	2766.3	4170.6	4387.8	2853.9	4658.8	1825.9	1707.3	13971.7	1680.9	1658.6	11624.1	10044.3	3389.4
135	GI_34147566-S	NM_000858.3	GUK1	Homo sapiens guanylate kinase 1 (GUK1), mRNA.	go_function: guanylate kinase activity [goid 0004385] [evidence TAS] [pmid 8663313]; go_function: drug binding [goid 0008144] [evidence NR]; go_function: membrane-associated guanylate kinase [goid 0004384] [evidence IEA]; go_function: ATP binding [goid 0005524] [evidence IEA]; go_function: kinase activity [goid 0016301] [evidence IEA]; go_function: transferase activity [goid 0016740] [evidence IE…	4749.1	1458.6	1664.2	3342.3	4341.6	3330.5	3837.4	2183.7	6864.8	3943	3889.5	2426.3	2132.7	2198	14027.8	2039.2	1987.5	15269.7	13195.7	2756.7
136	GI_7669488-S	NM_001953.2	ECGF1	Homo sapiens endothelial cell growth factor 1 (platelet-derived) (ECGF1), mRNA.	go_component: soluble fraction [goid 0005625] [evidence NR]; go_component: extracellular space [goid 0005615] [evidence NR]; go_function: thymidine phosphorylase activity [goid 0009032] [evidence TAS] [pmid 9924029]; go_function: platelet-derived growth factor receptor binding [goid 0005161] [evidence TAS] [pmid 2005900]; go_function: growth factor activity [goid 0008083] [evidence IEA]; go_funct…	6817.5	829	981.2	5407.4	6868.3	2517	5290.6	6857.5	4520.4	7421.3	7018.6	6671.4	1865.4	1596.3	12796.7	779.7	690.2	4686.9	9546.1	1245.9
137	GI_4557504-S	NM_000101.1	CYBA	Homo sapiens cytochrome b-245, alpha polypeptide (CYBA), mRNA.	go_component: membrane [goid 0016020] [evidence NR]; go_component: mitochondrion [goid 0005739] [evidence NR]; go_function: cytochrome b [goid 0009460] [evidence TAS] [pmid 2243141]; go_function: oxidoreductase activity [goid 0016491] [evidence IEA]; go_function: electron transporter activity [goid 0005489] [evidence TAS]; go_process: superoxide metabolism [goid 0006801] [evidence NR]; go_process…	6248.4	1073.5	1195.2	4577.5	4880.4	2109.5	5411.2	8018.3	4724.6	6973.7	8946.5	5008.5	526.4	498.3	14358	227.5	208.1	7818.9	9452.9	1346.7
138	GI_23510452-S	NM_021149.2	COTL1	Homo sapiens coactosin-like 1 (Dictyostelium) (COTL1), mRNA.	go_component: cytoskeleton [goid 0005856] [evidence IEA]; go_component: intracellular [goid 0005622] [evidence IEA]; go_component: cellular_component unknown [goid 0008372] [evidence ND]; go_component: actin cytoskeleton [goid 0015629] [evidence P] [pmid 10051563]; go_function: protein binding [goid 0005515] [evidence E] [pmid 10051563]; go_function: actin binding [goid 0003779] [evidence IDA] [p…	5795.5	1451.7	1760.2	2781.8	5409.7	1696.1	4962.3	7074.6	4320.7	5290.1	6058.4	4610.6	2462.2	2320.2	13358.7	961.3	900.8	8682.3	11838	1206.1
139	GI_28376644-S	NM_031477.2	MGC10500	Homo sapiens hypothetical protein MGC10500 (MGC10500), mRNA.		5104.2	1294.9	1572.9	2390.4	4470.4	2316.2	4390.6	4070	4900	3780.4	5008.8	3847.3	1977.1	1983.4	14481.8	1244.7	1319	12583.7	12246.2	3802.8
140	GI_16117792-S	NM_007209.2	RPL35	Homo sapiens ribosomal protein L35 (RPL35), mRNA.	go_component: cytosolic large ribosomal subunit (sensu Eukarya) [goid 0005842] [evidence TAS] [pmid 2891103]; go_component: nucleolus [goid 0005730] [evidence TAS] [pmid 2891103]; go_component: ribosome [goid 0005840] [evidence IEA]; go_component: intracellular [goid 0005622] [evidence IEA]; go_function: structural protein of ribosome [goid 0003735] [evidence E] [pmid 2891103]; go_function: mRNA …	3904.1	1744	1855.2	5002	4091.3	4359.3	3332.3	9649.1	5112.8	6058.9	4197.8	2747.7	1897.8	1693.6	14193.4	863.7	819.8	11138.9	8903.5	1079.9
141	GI_40254449-S	NM_003641.2	IFITM1	Homo sapiens interferon induced transmembrane protein 1 (9-27) (IFITM1), mRNA.	go_component: integral to membrane [goid 0016021] [evidence IEA]; go_component: plasma membrane [goid 0005886] [evidence TAS] [pmid 7559564]; go_function: receptor signaling protein activity [goid 0005057] [evidence TAS] [pmid 7559564]; go_process: negative regulation of cell proliferation [goid 0008285] [evidence TAS] [pmid 7559564]; go_process: cell surface receptor linked signal transduction […	3601.1	1578.1	1894.2	3687.5	6865	3293.1	3069.3	6697.4	3433	5197.6	5487.8	5432.9	2289.8	2045.6	14219.5	1146.5	1168.8	8161.7	11482	1370.9
142	GI_9845520-S	NM_002965.2	S100A9	Homo sapiens S100 calcium binding protein A9 (calgranulin B) (S100A9), mRNA.	go_component: extracellular space [goid 0005615] [evidence NR]; go_function: calcium ion binding [goid 0005509] [evidence TAS] [pmid 2149559]; go_function: signal transducer activity [goid 0004871] [evidence TAS] [pmid 3313057]; go_process: cell-cell signaling [goid 0007267] [evidence TAS] [pmid 3313057]; go_process: inflammatory response [goid 0006954] [evidence TAS] [pmid 3313057]	4435.6	1657.7	1758.6	3312.7	4948.3	3468	4016	11950.3	4829.7	5295.6	6146.1	4014.2	1899.5	1634.1	12325	617.8	580.7	6189.8	11013.6	1589.5
143	GI_21361518-S	NM_015999.2	ADIPOR1	Homo sapiens adiponectin receptor 1 (ADIPOR1), mRNA.	go_component: integral to membrane [goid 0016021] [evidence IEA]; go_function: receptor activity [goid 0004872] [evidence IEA]; go_process: fatty acid metabolism [goid 0006631] [evidence IEA]	3862.8	3954.8	4692.8	2642.3	4289.3	3068.8	3724.5	3099.2	2721.3	2316.6	4420.2	2317.8	3776.1	3412.3	11207.8	2934.3	2657.5	12252.2	10430	3864.5
144	GI_33386702-S	NM_182793.1	TMSL2	Homo sapiens thymosin-like 2 (TMSL2), mRNA.		2359.7	602.3	734.7	4772.9	7147.9	4026.3	1680.7	7553.5	7335.5	5680.1	6955.6	5382.9	842.9	401.6	11445.2	423.8	377.1	11509.3	8284.3	2015.4
145	GI_27886525-I	NM_173215.1	NFAT5	Homo sapiens nuclear factor of activated T-cells 5, tonicity-responsive (NFAT5), transcript variant 5, mRNA.	go_component: nucleus [goid 0005634] [evidence TAS] [pmid 10051678]; go_function: RNA polymerase II transcription factor activity [goid 0003702] [evidence TAS] [pmid 10377394]; go_function: transcription factor activity [goid 0003700] [evidence TAS] [pmid 10051678]; go_function: translation regulator activity [goid 0045182] [evidence IEA]; go_process: excretion [goid 0007588] [evidence TAS] [pmid…	4054.5	1258.8	1574.5	2580.7	3532	1325.1	2559.4	5370.7	4762.9	5182.6	5706.2	4509	1550.2	1520.3	16010.8	777.5	739.8	12369.8	11672.3	2114.4
146	GI_41146530-S	XM_371658.1	LOC389141	Homo sapiens similar to laminin receptor 1 (ribosomal protein SA); P40-3, functional; P40-8, functional; laminin receptor 1 (67kD, ribosomal protein SA) (LOC389141), mRNA.		4226	1383.8	1499.5	4113.6	4491.3	2988.4	3245.9	8011	6245.8	6910.2	4645.7	3837.9	1354.7	944.3	11366.5	753.4	628.5	11169.4	8694.4	1146.6
147	GI_37549531-S	XM_351234.1	LOC374954	Homo sapiens similar to 40S ribosomal protein S16 (LOC374954), mRNA.		4333.9	1550.3	1932.9	3958.1	3731.5	2967.9	3403.5	5897.6	5247.8	5000.9	5084.4	3567.7	1703.1	1382.4	12471	1153.4	941.9	12890.4	9043.3	935.4
148	GI_14249309-S	NM_032710.1	MGC13053	Homo sapiens hypothetical protein MGC13053 (MGC13053), mRNA.		4952.5	786.3	924.2	2911.9	3864.5	1462.5	3510	7538.8	4182.2	6024.7	5530	5392.6	1028.7	953.1	17828.5	518.6	498.8	7729.8	8440.4	1635
149	GI_38524611-S	NM_198853.1	TRIM50C	Homo sapiens tripartite motif-containing 50C (TRIM50C), mRNA.	go_component: intracellular [goid 0005622] [evidence IEA]; go_function: zinc ion binding [goid 0008270] [evidence IEA]	3305.4	688.4	791	2421.6	3984.6	1107.6	2838.6	5731.1	3674.8	4895.7	4798.1	4176.4	893.2	643.8	24429.5	338.6	342.7	9265.4	8937.2	1441.1
150	GI_13376746-S	NM_025152.1	C14orf127	Homo sapiens chromosome 14 open reading frame 127 (C14orf127), mRNA.	go_function: ATP binding [goid 0005524] [evidence IEA]; go_function: molecular_function unknown [goid 0005554] [evidence IEA]	4083.4	682.8	816.3	3364.5	4115.8	1548.6	2810	7206.1	3388.4	5234.3	4270.2	4384.1	651.9	495.7	23590.2	279	216.6	7604	8504.5	1441.6
151	GI_21536443-A	NM_007311.2	BZRP	Homo sapiens benzodiazapine receptor (peripheral) (BZRP), transcript variant PBR-S, mRNA.	go_component: mitochondrial outer membrane [goid 0005741] [evidence NR]; go_function: benzodiazepine receptor activity [goid 0008503] [evidence E] [pmid 1326278]; go_process: mitochondrial translocation [goid 0006628] [evidence E] [pmid 1326278]	4434.8	1651	2105.7	3916.9	4063.7	3188	3869.7	5128.5	3807.8	5089.3	4784.7	3625.4	1649.4	1600.4	13916.9	659.9	594.2	8840.5	10247.4	1282.1
152	GI_4503744-S	NM_001456.1	FLNA	Homo sapiens filamin A, alpha (actin binding protein 280) (FLNA), mRNA.	go_component: actin cytoskeleton [goid 0015629] [evidence TAS] [pmid 2391361]; go_function: actin cross-linking activity [goid 0003780] [evidence TAS] [pmid 9883725]; go_process: actin cytoskeleton reorganization [goid 0007012] [evidence TAS] [pmid 2391361]; go_process: cell surface receptor linked signal transduction [goid 0007166] [evidence NR]; go_process: cell motility [goid 0006928] [evidenc…	5565.9	1102	1236.1	4722.6	6344.3	2350.6	4505.2	5053.4	4121.5	6442.8	4204.5	4273.3	1628.7	1521.5	10593.2	845.3	789.7	9529.2	7654.4	1892.6
153	GI_30581139-A	NM_006263.2	PSME1	Homo sapiens proteasome (prosome, macropain) activator subunit 1 (PA28 alpha) (PSME1), transcript variant 1, mRNA.	go_component: 26S proteasome [goid 0005837] [evidence TAS] [pmid 8811196]; go_component: proteasome activator complex [goid 0008537] [evidence IEA]; go_function: proteasome activator activity [goid 0008538] [evidence NR]; go_process: immune response [goid 0006955] [evidence IEA]	3903.5	1739.9	1927.5	4036	4864.7	3127.3	3447.5	6466.9	3688.7	4904.3	4269.1	3767.5	2097.5	1816.1	14571	888.8	829.8	7505.6	9110.5	1260.6
154	GI_16579884-S	NM_000968.2	RPL4	Homo sapiens ribosomal protein L4 (RPL4), mRNA.	go_component: cytosolic large ribosomal subunit (sensu Eukarya) [goid 0005842] [evidence TAS] [pmid 8268230]; go_component: ribosome [goid 0005840] [evidence IEA]; go_component: intracellular [goid 0005622] [evidence IEA]; go_function: structural protein of ribosome [goid 0003735] [evidence P] [pmid 8268230]; go_function: RNA binding [goid 0003723] [evidence TAS] [pmid 8268230]; go_function: stru…	3665.8	1790.6	2029.4	3416.8	4815.9	2142.7	3445.4	6366.9	5138	4555.4	5887.1	2550.4	2075.2	1965.7	9451.1	1408	1323.3	12830.1	8231.2	969.1
155	GI_33589826-S	NM_000745.2	CHRNA5	Homo sapiens cholinergic receptor, nicotinic, alpha polypeptide 5 (CHRNA5), mRNA.	go_component: nicotinic acetylcholine-gated receptor-channel complex [goid 0005892] [evidence NR]; go_component: integral to membrane [goid 0016021] [evidence IEA]; go_function: nicotinic acetylcholine-activated cation-selective channel activity [goid 0004889] [evidence NR]; go_function: acetylcholine receptor activity [goid 0015464] [evidence NR]; go_function: extracellular ligand-gated ion chan…	4283.4	518.8	596.9	2724.7	4217.6	1378.8	2795	8188.2	3788.2	6617.2	4833.6	5363.7	736.1	488.7	19331	313	296.5	7491.8	6546.5	1777.7
156	GI_7706179-S	NM_016633.1	ERAF	Homo sapiens erythroid associated factor (ERAF), mRNA.	go_component: hemoglobin complex [goid 0005833] [evidence NAS] [pmid 12066189]; go_function: chaperone activity [goid 0003754] [evidence NAS] [pmid 12066189]; go_function: hemoglobin binding [goid 0030492] [evidence NAS] [pmid 12066189]; go_process: hemopoiesis [goid 0030097] [evidence NAS] [pmid 12066189]; go_process: hemoglobin metabolism [goid 0020027] [evidence NAS] [pmid 12066189]	2717.5	2576.1	2927.6	2915.5	2672.4	3212.6	2001.9	1233.2	3480.6	1538.5	2290.4	1644.9	4045.9	3555.2	10206.4	1527.4	1635.9	21028	4778.3	5776
157	GI_11386146-S	NM_002778.1	PSAP	Homo sapiens prosaposin (variant Gaucher disease and variant metachromatic leukodystrophy) (PSAP), mRNA.	go_component: lysosome [goid 0005764] [evidence IEA]; go_component: integral to membrane [goid 0016021] [evidence TAS] [pmid 1454804]; go_component: extracellular space [goid 0005615] [evidence TAS] [pmid 1454804]; go_function: lipid binding [goid 0008289] [evidence TAS] [pmid 1454804]; go_function: enzyme activator activity [goid 0008047] [evidence TAS] [pmid 2717620]; go_process: glycosphingoli…	5197.1	1016.5	1174	3653.8	5563.6	1898.2	3896.1	4865.1	5633.8	4706.6	6683.8	3440.8	1812.4	1642.6	10119.2	949.7	862.5	8541	8833.2	1156.9
158	GI_40353772-S	NM_015431.2	BIA2	Homo sapiens BIA2 (BIA2), mRNA.		3476.8	1152	1280.2	2369.7	3585.8	1509.1	2250.6	5109.3	4265.3	4591.9	4273.7	4230.4	1200.4	1004.1	16234.4	682.6	659.9	10575	10494.3	2020.5
159	GI_4505226-S	NM_002432.1	MNDA	Homo sapiens myeloid cell nuclear differentiation antigen (MNDA), mRNA.	go_component: nucleus [goid 0005634] [evidence NR]; go_function: DNA binding [goid 0003677] [evidence IEA]; go_function: translation regulator activity [goid 0045182] [evidence IEA]; go_process: cellular defense response [goid 0006968] [evidence TAS] [pmid 1644857]; go_process: regulation of transcription, DNA-dependent [goid 0006355] [evidence IEA]	5318.9	1262.3	1508.3	2902.6	4823.9	2340.6	4111	7699	5328.5	5707.5	5787.4	4344.6	1954.5	1504.7	8851.9	657.4	596.5	7695.2	7147.3	1236.1
160	GI_15451934-I	NM_003671.2	CDC14B	Homo sapiens CDC14 cell division cycle 14 homolog B (S. cerevisiae) (CDC14B), transcript variant 1, mRNA.		3251.6	2100	2608.5	1805	5006.7	1534.3	2535	1865.7	3498.5	1561.9	1836.8	2103.4	27.9	26.7	39661.5	23.3	23.1	4653.1	3498.3	2896.7
161	GI_6996015-A	NM_009588.1	LTB	Homo sapiens lymphotoxin beta (TNF superfamily, member 3) (LTB), transcript variant 2, mRNA.	go_component: integral to membrane [goid 0016021] [evidence IEA]; go_component: cellular_component unknown [goid 0008372] [evidence ND] [pmid 9299492]; go_function: receptor binding [goid 0005102] [evidence P] [pmid 7916655]; go_function: tumor necrosis factor receptor binding [goid 0005164] [evidence IEA]; go_function: toxin activity [goid 0015070] [evidence NAS] [pmid 9299492]; go_process: sign…	4834.5	1010.6	1066.4	3029.2	4711.8	2305.2	3351.1	6111.1	4710.4	4113.1	5053.9	4717.3	1286.6	1192.6	15818.2	760.7	737.9	7235.8	6738	1107
162	GI_15431291-S	NM_000976.2	RPL12	Homo sapiens ribosomal protein L12 (RPL12), mRNA.	go_component: cytosolic large ribosomal subunit (sensu Eukarya) [goid 0005842] [evidence NR]; go_component: ribosome [goid 0005840] [evidence IEA]; go_component: intracellular [goid 0005622] [evidence IEA]; go_function: structural protein of ribosome [goid 0003735] [evidence NR]; go_function: RNA binding [goid 0003723] [evidence NR]; go_function: structural constituent of ribosome [goid 0003735] …	4083.8	1258.2	1450.9	3891.5	6072.7	3403	3700.9	5236.8	5103.1	4242.3	4976.1	3032.9	1291.4	1181.6	10630.8	863.2	780.9	10288.5	7212.8	1140.8
163	GI_15011935-S	NM_001029.2	RPS26	Homo sapiens ribosomal protein S26 (RPS26), mRNA.	go_component: cytosolic small ribosomal subunit (sensu Eukarya) [goid 0005843] [evidence TAS] [pmid 9602156]; go_component: ribosome [goid 0005840] [evidence IEA]; go_component: intracellular [goid 0005622] [evidence IEA]; go_component: nucleus [goid 0005634] [evidence IEA]; go_function: structural protein of ribosome [goid 0003735] [evidence P] [pmid 9602156]; go_function: RNA binding [goid 0003…	4511.7	1304.3	1686.3	2777.4	2416.6	1568.2	3458.2	6125.8	2688.5	3160.8	8549.8	4512.6	2332.9	1891.9	14008.8	1268	1226	11074.3	4950.5	258
164	GI_38683865-S	NM_003730.3	RNASET2	Homo sapiens ribonuclease T2 (RNASET2), mRNA.	go_component: extracellular [goid 0005576] [evidence P] [pmid 9192857]; go_function: ribonuclease activity [goid 0004540] [evidence P] [pmid 9192857]; go_process: RNA catabolism [goid 0006401] [evidence P] [pmid 9192857]	4995.3	1796.3	1956.2	4155.5	3855.3	3005.7	4489	7151.2	3157.3	3837.6	3853.6	3473	1986.1	1769	11433.9	928.5	835.8	7230	8286	949.7
165	GI_38045951-S	NM_021030.2	ZNF14	Homo sapiens zinc finger protein 14 (KOX 6) (ZNF14), mRNA.	go_component: nucleus [goid 0005634] [evidence IEA]; go_function: DNA binding [goid 0003677] [evidence IEA]; go_process: regulation of transcription, DNA-dependent [goid 0006355] [evidence IEA]	3668.9	547.9	648.8	2624	3916.2	1426.2	2560.4	8082.5	4168.5	5879	4547.2	4744.9	491.5	348.7	19009.5	249.2	246.3	7236.8	6422.8	1811.7
166	GI_34147371-S	NM_024299.2	C20orf149	Homo sapiens chromosome 20 open reading frame 149 (C20orf149), mRNA.	go_component: nucleus [goid 0005634] [evidence IEA]; go_function: DNA binding [goid 0003677] [evidence IEA]; go_process: regulation of transcription, DNA-dependent [goid 0006355] [evidence IEA]	5528.4	645.7	701.7	2402.5	5961.3	1269.1	4722.4	2679.2	4173.3	4663.3	7470.1	2894.6	1580.2	1465.7	10475	1597.4	1485.6	5889.3	11359.7	1572.6
167	GI_42518079-S	NM_003202.2	TCF7	Homo sapiens transcription factor 7 (T-cell specific, HMG-box) (TCF7), transcript variant 1, mRNA.	go_component: nucleus [goid 0005634] [evidence IEA]; go_function: RNA polymerase II transcription factor activity [goid 0003702] [evidence TAS] [pmid 1569101]; go_function: DNA binding [goid 0003677] [evidence IEA]; go_function: translation regulator activity [goid 0045182] [evidence IEA]; go_process: regulation of transcription from Pol II promoter [goid 0006357] [evidence TAS] [pmid 1569101]; g…	3762.7	1097.9	1279.3	3895.1	5522.5	2022.8	3040.3	4318.3	3947.6	3654.2	5147.8	3453.4	1394.9	1203	18080.9	969.1	837.4	6753.8	6925.8	1005.7
168	GI_14670385-S	NM_001024.2	RPS21	Homo sapiens ribosomal protein S21 (RPS21), mRNA.	go_component: cytosolic small ribosomal subunit (sensu Eukarya) [goid 0005843] [evidence TAS] [pmid 8332502]; go_component: ribosome [goid 0005840] [evidence IEA]; go_component: intracellular [goid 0005622] [evidence IEA]; go_function: structural protein of ribosome [goid 0003735] [evidence P] [pmid 8332502]; go_function: RNA binding [goid 0003723] [evidence TAS] [pmid 8332502]; go_function: stru…	2910.9	1629.8	2006	3724.5	3196.4	3529.7	2684.1	7476	4210.2	4472.3	4356.9	2186.4	1846.1	1763.4	10228.3	998.8	920.2	11400.5	7498.6	953.1
169	GI_14277699-S	NM_001016.2	RPS12	Homo sapiens ribosomal protein S12 (RPS12), mRNA.	go_component: cytosolic small ribosomal subunit (sensu Eukarya) [goid 0005843] [evidence TAS] [pmid 1861993]; go_component: ribosome [goid 0005840] [evidence IEA]; go_component: intracellular [goid 0005622] [evidence IEA]; go_function: structural protein of ribosome [goid 0003735] [evidence P] [pmid 1861993]; go_function: RNA binding [goid 0003723] [evidence TAS] [pmid 1861993]; go_function: stru…	3704.6	2353.8	2562.2	3231.7	4572.9	4211.5	3347.3	3922.1	5036	3669.6	3795.4	2620.4	1649.4	1577.9	13383.2	1096.2	1075.2	9206.2	4960.8	1561.3
170	GI_31742491-S	NM_018177.2	N4BP2	Homo sapiens Nedd4 binding protein 2 (N4BP2), mRNA.	go_function: damaged DNA binding [goid 0003684] [evidence IEA]; go_function: ATP binding [goid 0005524] [evidence IEA]; go_process: mismatch repair [goid 0006298] [evidence IEA]	3741.7	744.1	860.1	3173.9	3666.7	1715.2	2852.6	8043.1	2952.6	5558.9	3661.1	4431.6	674.5	538.4	18764.7	281.7	269.2	7083.5	6845.2	1315.5
171	GI_31543210-S	NM_006471.2	MRCL3	Homo sapiens myosin regulatory light chain MRCL3 (MRCL3), mRNA.	go_component: muscle myosin [goid 0005859] [evidence NR]; go_component: myosin [goid 0016459] [evidence IEA]; go_function: calcium ion binding [goid 0005509] [evidence IEA]; go_process: regulation of smooth muscle contraction [goid 0006940] [evidence NR]; go_process: muscle development [goid 0007517] [evidence IEA]	3681.8	1964.3	2177.9	3380.3	4128.1	2721.6	2999.1	3779.4	3033.3	4136.6	3916.4	3129	2112.4	1641.8	9496.5	973.7	855.1	11650.5	10245.7	951.7
172	GI_24429585-S	NM_000569.4	FCGR3A	Homo sapiens Fc fragment of IgG, low affinity IIIa, receptor for (CD16) (FCGR3A), mRNA.	go_component: integral to membrane [goid 0016021] [evidence IEA]; go_component: plasma membrane [goid 0005886] [evidence TAS] [pmid 2138330]; go_function: receptor activity [goid 0004872] [evidence IEA]; go_function: IgG binding [goid 0019864] [evidence IEA]; go_process: immune response [goid 0006955] [evidence TAS] [pmid 2138330]	4396.7	1656	1886.3	3555.2	5267.7	5013.1	3646	8904.7	1709.3	2301.1	6049.7	2209.3	3390.5	2871.9	6131.8	1318.5	1299.9	4810	8408.4	1222.1
173	GI_4505574-S	NM_002568.1	PABPC1	Homo sapiens poly(A) binding protein, cytoplasmic 1 (PABPC1), mRNA.	go_component: cytoplasm [goid 0005737] [evidence TAS] [pmid 9582337]; go_function: poly(A) binding [goid 0008143] [evidence TAS] [pmid 2885805]; go_function: RNA binding [goid 0003723] [evidence IEA]; go_process: mRNA polyadenylation [goid 0006378] [evidence TAS] [pmid 2885805]	4312.4	1808.8	1923.3	2387.7	4789.6	1394.5	3899.4	4507.6	4276.9	4027.5	4272.7	3137.3	1792.5	1512.8	10072.4	1036.8	941.7	9687.3	8440.3	1405
174	GI_9845515-A	NM_019554.1	S100A4	Homo sapiens S100 calcium binding protein A4 (calcium protein, calvasculin, metastasin, murine placental homolog) (S100A4), transcript variant 2, mRNA.	go_function: calcium ion binding [goid 0005509] [evidence TAS] [pmid 8204608]; go_process: invasive growth [goid 0007125] [evidence NR]	5127.9	814.4	971.5	3381.5	3500.1	2027.1	4107.6	6566.5	4458.6	5815.6	4533.6	4452.2	1323.2	1208.9	8660.5	449.8	444.5	6674.4	9548.5	1191.4
175	GI_5453713-S	NM_006457.1	LIM	Homo sapiens LIM protein (similar to rat protein kinase C-binding enigma) (LIM), mRNA.	go_function: protein kinase C binding [goid 0005080] [evidence P] [pmid 10429367]; go_process: signal transduction [goid 0007165] [evidence P] [pmid 10429367]	3060.3	971.2	1035.2	2250.7	3489.8	1027.6	2237.5	4669.2	3833.4	5079.2	4726.6	3810.6	1246.6	1077.2	15706.3	666.7	565.2	9367.8	8412.2	1627.2
176	GI_14591905-S	NM_012423.2	RPL13A	Homo sapiens ribosomal protein L13a (RPL13A), mRNA.	go_component: large ribosomal subunit [goid 0015934] [evidence TAS] [pmid 10580157]; go_component: intracellular [goid 0005622] [evidence IEA]; go_function: structural protein of ribosome [goid 0003735] [evidence E] [pmid 10580157]; go_function: structural constituent of ribosome [goid 0003735] [evidence TAS] [pmid 10580157]; go_process: protein biosynthesis [goid 0006412] [evidence IEA]	3138.6	1679	1962.7	3681.6	3275.6	2366.6	3015.5	5618.5	3815	4466.6	3874.5	2458.6	1512.7	1433.9	10461.3	1074.4	985	11161.1	7757.6	868.7
177	GI_4507894-S	NM_003380.1	VIM	Homo sapiens vimentin (VIM), mRNA.		4670.1	1264.3	1456.5	2314.5	4173.9	1265.8	4437	3861.5	3913.7	3886.9	6060.1	2817.2	2092.3	1719.3	7643	979.6	859.1	10003.1	9781.7	1104.2
178	GI_36951095-S	NM_002029.3	FPR1	Homo sapiens formyl peptide receptor 1 (FPR1), mRNA.	go_component: endosome [goid 0005768] [evidence TAS] [pmid 10823817]; go_component: integral to membrane [goid 0016021] [evidence TAS] [pmid 2161213]; go_component: plasma membrane [goid 0005886] [evidence TAS] [pmid 10882119]; go_function: N-formyl peptide receptor activity [goid 0004982] [evidence TAS] [pmid 10820279]; go_function: receptor activity [goid 0004872] [evidence TAS] [pmid 10857861]…	5071.3	1147.7	1307.2	2575	3929.5	2694.6	3923.3	7974.3	3023	3883.2	2795.4	4306.6	1191.1	1261.1	11187.9	340	329.7	6087	10099.7	1086.5
179	GI_13904867-S	NM_001014.2	RPS10	Homo sapiens ribosomal protein S10 (RPS10), mRNA.	go_component: cytosolic small ribosomal subunit (sensu Eukarya) [goid 0005843] [evidence TAS] [pmid 7772601]; go_component: nucleus [goid 0005634] [evidence IEA]; go_function: structural protein of ribosome [goid 0003735] [evidence P] [pmid 7772601]; go_function: RNA binding [goid 0003723] [evidence TAS] [pmid 7772601]; go_function: structural constituent of ribosome [goid 0003735] [evidence TAS]…	2755.5	2054.1	2295.8	3263.3	2993.9	3375.2	2358.8	5293.7	4668.8	3586.8	2863.8	1643.1	2341.4	2088.8	9205.4	1259.3	1082.7	12005.6	8086.2	859.7
180	GI_24797073-S	NM_033554.2	HLA-DPA1	Homo sapiens major histocompatibility complex, class II, DP alpha 1 (HLA-DPA1), mRNA.	go_component: integral to plasma membrane [goid 0005887] [evidence NAS] [pmid 2461352]; go_function: MHC class II receptor activity [goid 0045012] [evidence NAS] [pmid 2461352]; go_process: immune response [goid 0006955] [evidence NAS] [pmid 2461352]; go_process: antigen presentation, exogenous antigen [goid 0019884] [evidence IEA]; go_process: antigen processing, exogenous antigen via MHC class …	3597.8	1251	1578.6	3058.2	3022.8	1266.5	3067.5	5936.6	3132.5	4199.8	3216.4	3156.3	1358.9	1325.7	12364.8	842.3	853.9	9551.3	9546.2	787.7
181	GI_17981709-S	NM_001997.2	FAU	Homo sapiens Finkel-Biskis-Reilly murine sarcoma virus (FBR-MuSV) ubiquitously expressed (fox derived); ribosomal protein S30 (FAU), mRNA.	go_component: ribosome [goid 0005840] [evidence P] [pmid 8395683]; go_component: cytoplasm [goid 0005737] [evidence P] [pmid 8395683]; go_function: ubiquitin [goid 0005551] [evidence P] [pmid 8395683]; go_function: structural protein of ribosome [goid 0003735] [evidence P] [pmid 8395683]; go_function: RNA binding [goid 0003723] [evidence P] [pmid 8395683]; go_process: protein biosynthesis [goid 0…	3164.4	1716	1921.3	3014.8	3073	2726.9	2909.2	5747.5	3847.2	4483.5	4335.8	2154	2154.6	2111.1	10545.3	1004.7	944.8	9090	7158	966.5
182	GI_22538813-S	NM_002985.2	CCL5	Homo sapiens chemokine (C-C motif) ligand 5 (CCL5), mRNA.	go_component: extracellular [goid 0005576] [evidence IEA]; go_function: chemokine activity [goid 0008009] [evidence TAS] [pmid 10770925]; go_function: antiviral response protein activity [goid 0003800] [evidence TAS] [pmid 10583963]; go_function: receptor binding [goid 0005102] [evidence E]; go_function: signal transducer activity [goid 0004871] [evidence E]; go_process: response to virus [goid 0…	2778.7	1550.5	1775.9	4684.2	3541.3	1731.2	2579.1	4375.9	2602	6114.8	2890.3	3247.3	1821.3	1746.7	10030.5	656.3	650.8	12078.9	6658.2	1396.4
183	GI_4505696-S	NM_000441.1	SLC26A4	Homo sapiens solute carrier family 26, member 4 (SLC26A4), mRNA.	go_component: integral to membrane [goid 0016021] [evidence TAS] [pmid 10192399]; go_function: iodide transporter activity [goid 0015111] [evidence TAS] [pmid 10192399]; go_function: sulfate transporter activity [goid 0015116] [evidence P] [pmid 9398842]; go_function: chloride transporter activity [goid 0015108] [evidence TAS] [pmid 10192399]; go_function: sulfate porter activity [goid 0008271] […	3358	756.7	902.8	1833	2900.4	936.2	2224.4	5516.5	3554	5258.4	3648.6	4001.9	1062.9	870	15938.2	485	435.5	8600.2	8347.9	1025.9
184	GI_21359891-S	NM_013446.2	MKRN1	Homo sapiens makorin, ring finger protein, 1 (MKRN1), mRNA.	go_component: cellular_component unknown [goid 0008372] [evidence ND]; go_function: nucleic acid binding [goid 0003676] [evidence IEA]; go_function: molecular_function unknown [goid 0005554] [evidence ND]; go_process: biological_process unknown [goid 0000004] [evidence ND]	3287	1908.7	2133.6	2448.3	3237.1	3481.4	2701.3	3270.1	2748.1	2595.1	2371.6	1521.2	2825.1	2672.7	8330.2	1372.5	1431.5	12820.5	5284.2	4527.8
185	GI_19923589-S	NM_022483.2	FLJ21657	Homo sapiens hypothetical protein FLJ21657 (FLJ21657), mRNA.		3875.3	493.4	580.8	2282	3421.2	1114.2	2653.1	7311.3	3120.1	5348.7	3695.5	4710.8	570.2	310.2	17684	235	187.8	5912.7	6059.8	1373.4
186	GI_4557893-S	NM_000239.1	LYZ	Homo sapiens lysozyme (renal amyloidosis) (LYZ), mRNA.	go_component: extracellular space [goid 0005615] [evidence TAS] [pmid 2829884]; go_function: lysozyme activity [goid 0003796] [evidence TAS] [pmid 2829884]; go_function: amyloid protein [goid 0005208] [evidence TAS] [pmid 8464497]; go_function: lysin activity [goid 0015465] [evidence NR]; go_function: structural molecule activity [goid 0005198] [evidence IEA]; go_function: bacteriolytic toxin act…	6723.5	1652.8	1766.7	1926.8	1369	2310.8	5406.5	6654	4926.1	4401.6	5577	2725.4	490.4	429	3345.3	566	548.6	9111.5	9715.7	1185.1
187	GI_37550793-S	XM_350801.1	LOC374351	Homo sapiens similar to ribosomal protein L13a; 60S ribosomal protein L13a; 23 kD highly basic protein (LOC374351), mRNA.		3166.6	1476.8	1510.1	3961.3	3820.6	3195.5	2571	5255.1	4304.4	4553.5	4149.9	2344	1140.7	1074.3	10875.7	632.4	569.1	9837.4	5483.3	813.2
188	GI_7382490-S	NM_002298.2	LCP1	Homo sapiens lymphocyte cytosolic protein 1 (L-plastin) (LCP1), mRNA.	go_component: cytosol [goid 0005829] [evidence IDA] [pmid 2111166]; go_function: actin binding [goid 0003779] [evidence NAS] [pmid 2252891]; go_function: calcium ion binding [goid 0005509] [evidence NAS] [pmid 2378651]; go_process: biological_process unknown [goid 0000004] [evidence ND]	3929.7	1386.1	1489.1	3443.9	4759.6	2411.4	3045.4	5913.7	2990.9	3613.8	4848.1	2862.5	1861.7	1617.3	10824.8	841.5	803.3	6414.2	6092	1486.5
189	GI_34098945-S	NM_004559.2	NSEP1	Homo sapiens nuclease sensitive element binding protein 1 (NSEP1), mRNA.	go_component: nucleus [goid 0005634] [evidence P] [pmid 3174636]; go_function: double-stranded DNA binding [goid 0003690] [evidence E]; go_function: single-stranded DNA binding [goid 0003697] [evidence E]; go_function: DNA binding [goid 0003677] [evidence E] [pmid 2977358]; go_function: transcription factor activity [goid 0003700] [evidence E] [pmid 3174636]; go_process: response to pest/pathogen…	3053.5	2086.1	2348.9	2227.1	4072.7	1399.1	2736.7	2463.4	3374.9	2232.2	3867.6	1424.8	2731.7	1950.7	7526.4	1801.7	1278.6	13142.2	9103.1	1594.9
190	GI_17017969-S	NM_000986.2	RPL24	Homo sapiens ribosomal protein L24 (RPL24), mRNA.	go_component: cytosolic large ribosomal subunit (sensu Eukarya) [goid 0005842] [evidence TAS] [pmid 9582194]; go_component: ribosome [goid 0005840] [evidence IEA]; go_component: intracellular [goid 0005622] [evidence IEA]; go_function: structural protein of ribosome [goid 0003735] [evidence P] [pmid 9582194]; go_function: RNA binding [goid 0003723] [evidence TAS] [pmid 9582194]; go_function: stru…	3067.2	1521.7	1707.7	3324.6	3466.5	2712.9	2677.9	5027.9	3485.2	3798.1	3745.1	2137.1	1707	1461.6	10079.1	942	953.7	10359.5	6638.1	1028.2
191	GI_45439350-S	NM_016332.2	SEPX1	Homo sapiens selenoprotein X, 1 (SEPX1), mRNA.	go_component: cellular_component unknown [goid 0008372] [evidence ND]; go_function: molecular_function unknown [goid 0005554] [evidence ND]; go_function: selenium binding [goid 0008430] [evidence IEA]; go_function: oxidoreductase activity [goid 0016491] [evidence IEA]; go_process: biological_process unknown [goid 0000004] [evidence ND]	4436.2	1006.4	1137.5	2775.9	4497.6	2254.7	3637.6	5870.9	3668.4	4411.5	4599.5	4474.3	1667.3	1509.7	8582.5	806.6	790.4	4534.8	7564.9	1208.7
192	GI_11641260-S	NM_022350.1	LRAP	Homo sapiens leukocyte-derived arginine aminopeptidase (LRAP), mRNA.		2772.4	1146.4	1320.2	1972.4	2776.8	1158.1	1971.9	4244.5	3628.1	4054.1	4140.5	3444.4	1245.3	1326.6	12087.3	731.3	706.4	9796.8	9038.4	1178.3
193	GI_35250772-S	NM_018457.2	DKFZP564J157	Homo sapiens DKFZp564J157 protein (DKFZP564J157), mRNA.		3629.3	1302.8	1518.3	3797.1	3991.3	2637.8	3085.3	6392.6	2798.2	3196	3046.5	2746	1584	1375	9561.7	673.5	661.8	6929.4	8017.6	909.3
194	GI_7706334-S	NM_016056.1	CGI-119	Homo sapiens CGI-119 protein (CGI-119), mRNA.		2660.2	835.3	787.2	2173.5	2958.2	1063.4	2045.6	4659.5	3313.9	4118.9	4186.1	3655.4	834.8	876	15373.6	435.7	413.1	8488.4	7552.5	1334.9
195	GI_38327629-A	NM_198394.1	C9orf85	Homo sapiens chromosome 9 open reading frame 85 (C9orf85), transcript variant 2, mRNA.	go_component: nucleus [goid 0005634] [evidence IEA]; go_function: DNA binding [goid 0003677] [evidence IEA]; go_process: regulation of transcription, DNA-dependent [goid 0006355] [evidence IEA]	2960.6	825.4	984.7	2146.4	3241.1	1115.8	1991.4	4836.4	2906.3	4139.7	3801.5	3313.3	952	833	15417.1	460.1	453.5	8184.5	7729.8	1251.1
196	GI_9945387-S	NM_000407.3	GP1BB	Homo sapiens glycoprotein Ib (platelet), beta polypeptide (GP1BB), mRNA.	go_component: integral to plasma membrane [goid 0005887] [evidence TAS] [pmid 3353370]; go_component: plasma membrane [goid 0005886] [evidence E]; go_function: thrombin receptor activity [goid 0015057] [evidence NR]; go_function: transmembrane receptor activity [goid 0004888] [evidence TAS] [pmid 3353370]; go_function: cell adhesion molecule activity [goid 0005194] [evidence IEA]; go_process: blo…	2492.4	1237.7	1479.8	1036.8	4098.5	1486	1952.3	1780.7	3768.6	2842.4	4650	3945.6	2072.3	1915.7	13666.7	1287	1215.7	3913	10778.8	1418.7
197	GI_37546926-S	XM_351437.1	LOC375207	Homo sapiens similar to 40S ribosomal protein SA (P40) (34/67 kDa laminin receptor) (Colon carcinoma laminin-binding protein) (NEM/1CHD4) (Multidrug resistance-associated protein MGr1-Ag) (LOC375207), mRNA.		2849.4	1141.7	1409.8	3061.6	2893.5	2076.7	2077.3	5711.8	4633.5	4547.3	3508.8	2549.3	1298.6	992.6	9320.2	766.7	695.7	9531.5	6660.6	896
198	GI_21614543-S	NM_002964.3	S100A8	Homo sapiens S100 calcium binding protein A8 (calgranulin A) (S100A8), mRNA.	go_component: extracellular space [goid 0005615] [evidence NR]; go_function: calcium ion binding [goid 0005509] [evidence TAS] [pmid 2149559]; go_process: inflammatory response [goid 0006954] [evidence TAS] [pmid 3313057]	1854.2	1221.6	1469.2	2537.7	4692.2	2176.3	1836.5	16632.3	3887.1	3567.6	3613.1	920.6	1819	1539.2	4975.3	356.6	321.6	5096	7318.2	763.7
199	GI_10938013-S	NM_005354.2	JUND	Homo sapiens jun D proto-oncogene (JUND), mRNA.	go_component: chromatin [goid 0005717] [evidence TAS] [pmid 1903194]; go_component: nucleus [goid 0005634] [evidence IEA]; go_component: chromatin [goid 0000785] [evidence TAS]; go_function: RNA polymerase II transcription factor activity [goid 0003702] [evidence TAS] [pmid 1903194]; go_function: translation regulator activity [goid 0045182] [evidence IEA]; go_function: transcription factor activ…	3655.9	1051.6	1259	1764.6	3059.3	1264	2778.5	3165.8	2455.1	3440.8	5728.2	2795.3	1774.8	1859.6	11867.3	1088.8	1121.4	7475.8	6682.6	2116
200	GI_14790142-S	NM_001025.2	RPS23	Homo sapiens ribosomal protein S23 (RPS23), mRNA.	go_component: cytosolic small ribosomal subunit (sensu Eukarya) [goid 0005843] [evidence TAS] [pmid 8415000]; go_component: intracellular [goid 0005622] [evidence IEA]; go_function: structural protein of ribosome [goid 0003735] [evidence P] [pmid 8415000]; go_function: RNA binding [goid 0003723] [evidence TAS] [pmid 8415000]; go_function: structural constituent of ribosome [goid 0003735] [evidenc…	3532.2	1512.1	1734.4	2551.3	4913.4	2241	2983.2	2753.8	4267	4332.5	3705	1803	1858.4	1650.6	10535.5	1266.2	1271	10294.6	2241.2	938.6
201	GI_18104947-S	NM_000982.2	RPL21	Homo sapiens ribosomal protein L21 (RPL21), mRNA.	go_component: cytosolic large ribosomal subunit (sensu Eukarya) [goid 0005842] [evidence TAS] [pmid 7772601]; go_component: ribosome [goid 0005840] [evidence IEA]; go_component: intracellular [goid 0005622] [evidence IEA]; go_function: structural protein of ribosome [goid 0003735] [evidence P] [pmid 7772601]; go_function: RNA binding [goid 0003723] [evidence TAS] [pmid 7772601]; go_function: stru…	2603.3	1507.6	1533.1	3191.5	4415.8	2259.7	2308	7119.6	6319.1	4736.4	2674.2	1316.5	1447.5	763.1	6799	901.3	529.3	8592.1	5472.8	1851.1
202	GI_34304319-S	NM_024026.3	MRP63	Homo sapiens mitochondrial ribosomal protein 63 (MRP63), nuclear gene encoding mitochondrial protein, mRNA.	go_function: structural constituent of ribosome [goid 0003735] [evidence IEA]	2667.6	1264.5	1392.5	1993.2	2903	1181.5	1849.4	3975.4	3287.4	3785.9	4267.9	2957.8	1210.8	1194.3	11052.1	660.4	656.6	9745.3	8506.3	1354.3
203	GI_23238218-S	NM_007068.2	DMC1	Homo sapiens DMC1 dosage suppressor of mck1 homolog, meiosis-specific homologous recombination (yeast) (DMC1), mRNA.	go_component: meiotic chromosome [goid 0005711] [evidence TAS] [pmid 8602360]; go_component: nucleus [goid 0005634] [evidence IEA]; go_component: condensed nuclear chromosome [goid 0000794] [evidence TAS]; go_function: ATP binding [goid 0005524] [evidence TAS] [pmid 8602360]; go_function: DNA binding [goid 0003677] [evidence P] [pmid 8602360]; go_function: DNA dependent ATPase activity [goid 0008…	3415.5	297.3	367.6	2049.1	2963.5	814.3	2330.5	6969.2	3143.1	5097.4	3892	4489.5	550.8	270.1	16395.1	228.3	165.7	5774.6	5145	1380.1
204	GI_5454161-S	NM_006472.1	TXNIP	Homo sapiens thioredoxin interacting protein (TXNIP), mRNA.	go_component: cellular_component unknown [goid 0008372] [evidence ND]; go_function: molecular_function unknown [goid 0005554] [evidence ND]; go_process: sensory perception [goid 0007600] [evidence IEA]; go_process: signal transduction [goid 0007165] [evidence IEA]; go_process: biological_process unknown [goid 0000004] [evidence ND]	4271.3	1310.8	1615.3	2575.4	3304.3	1487.3	3283.9	6290.7	2272.3	3748.5	3847.7	2148.4	1642	1553	8330.7	826.9	756.4	7441	7847.4	918.7
205	GI_4758393-S	NM_004475.1	FLOT2	Homo sapiens flotillin 2 (FLOT2), mRNA.	go_component: plasma membrane [goid 0005886] [evidence NR]; go_component: integral to membrane [goid 0016021] [evidence IEA]; go_component: flotillin complex [goid 0016600] [evidence IEA]; go_function: cell adhesion molecule activity [goid 0005194] [evidence IEA]; go_process: epidermal differentiation [goid 0008544] [evidence TAS] [pmid 8051082]; go_process: cell adhesion [goid 0007155] [evidence…	3680.7	968.8	1093.1	2343	5556.9	1623.3	2936.7	4165.9	2644.3	3680.6	4070	3217.3	1658	1605.2	10444.8	613.1	581.8	6366.1	6951.6	1225.7
206	GI_4506742-S	NM_001012.1	RPS8	Homo sapiens ribosomal protein S8 (RPS8), mRNA.	go_component: cytosolic small ribosomal subunit (sensu Eukarya) [goid 0005843] [evidence TAS] [pmid 8432552]; go_component: ribosome [goid 0005840] [evidence IEA]; go_component: intracellular [goid 0005622] [evidence IEA]; go_function: structural protein of ribosome [goid 0003735] [evidence P] [pmid 8432552]; go_function: RNA binding [goid 0003723] [evidence TAS] [pmid 8432552]; go_function: stru…	2968.1	1753	1894.5	3057	2746.8	2179.2	2451	4805.3	3714.1	4143.6	3369.2	2742.9	1590.9	1476.2	7299.6	1008.8	1082.7	8383.7	6987.4	834.9
207	GI_23199977-A	NM_152240.1	WIG1	Homo sapiens p53 target zinc finger protein (WIG1), transcript variant 2, mRNA.		2572.8	1151.9	1314.7	1906.5	2554.5	1042.6	1834.9	3941.1	3020.9	4036	3817.8	3376.6	1180.4	1314.5	10407.2	748.8	732.1	9127.1	9150.3	1108.6
208	GI_27754201-S	NM_173709.1	MTND2	Homo sapiens NADH dehydrogenase 2 (MTND2), mRNA.	go_component: respiratory chain complex I (sensu Eukarya) [goid 0005747] [evidence NAS] [pmid 9475751]; go_component: NADH dehydrogenase complex (ubiquinone) (sensu Eukarya) [goid 0005748] [evidence IEA]; go_component: mitochondrion [goid 0005739] [evidence IEA]; go_component: integral to membrane [goid 0016021] [evidence IEA]; go_function: NADH dehydrogenase (ubiquinone) activity [goid 0008137] …	3095.8	1006.6	1356.3	1757.5	3548.3	1071.3	2507.8	2606.3	1989.7	2993.4	5459.5	3352.4	887.3	752.5	17537.5	638.4	661.3	6204.3	6023.9	763.3
209	GI_10835237-S	NM_006435.1	IFITM2	Homo sapiens interferon induced transmembrane protein 2 (1-8D) (IFITM2), mRNA.	go_component: integral to membrane [goid 0016021] [evidence IEA]; go_process: immune response [goid 0006955] [evidence TAS] [pmid 1906403]	3735.2	655.8	784.1	2495	5364.3	2551.2	3108.8	5695.8	3138.7	3465.5	5264.2	4427.5	791.3	695.5	11139.6	396.1	399.2	3716.1	4763.6	1425
210	GI_4504040-S	NM_002070.1	GNAI2	Homo sapiens guanine nucleotide binding protein (G protein), alpha inhibiting activity polypeptide 2 (GNAI2), mRNA.	go_component: peripheral plasma membrane protein [goid 0000157] [evidence E]; go_function: heterotrimeric G-protein GTPase, alpha-subunit [goid 0000263] [evidence TAS] [pmid 9637720]; go_function: GTP binding [goid 0005525] [evidence IEA]; go_function: signal transducer activity [goid 0004871] [evidence IEA]; go_function: heterotrimeric G-protein GTPase activity [goid 0003927] [evidence TAS]; go_…	3556.7	742	886.2	2126.9	2897.7	1313.5	3058.3	6348.5	3027.5	5752.1	3542.3	3804.1	1096	906.3	11644.1	450.1	471.8	5008.8	5778.1	1213.9
211	GI_15718674-S	NM_001629.2	ALOX5AP	Homo sapiens arachidonate 5-lipoxygenase-activating protein (ALOX5AP), mRNA.	go_component: integral to membrane [goid 0016021] [evidence IEA]; go_component: membrane fraction [goid 0005624] [evidence NR]; go_function: enzyme activator activity [goid 0008047] [evidence TAS] [pmid 2300173]; go_function: binding [goid 0005488] [evidence TAS] [pmid 2300173]; go_process: leukotriene metabolism [goid 0006691] [evidence NR]; go_process: leukotriene biosynthesis [goid 0019370] [e…	2874	1146.6	1339.7	3017.7	4087.2	2880.1	2522.2	5804.7	2582.9	3260.9	5045.9	2546.1	965	950.5	10285.4	700.4	663.8	4345.3	7437.9	780.4
212	GI_12621915-S	NM_004084.2	DEFA1	Homo sapiens defensin, alpha 1, myeloid-related sequence (DEFA1), mRNA.	go_component: extracellular [goid 0005576] [evidence IEA]; go_function: antimicrobial peptide activity [goid 0003795] [evidence NR]; go_function: antifungal peptide activity [goid 0003799] [evidence IEA]; go_process: chemotaxis [goid 0006935] [evidence E]; go_process: immune response [goid 0006955] [evidence E]; go_process: xenobiotic metabolism [goid 0006805] [evidence IEA]; go_process: defense …	2727.2	3026.9	3333.5	2244.7	3246	5579.4	2128	11132.7	11405.6	2053.3	2318.9	675.4	886.3	646.2	3668.8	131.2	127.1	5021	411.7	2376
213	GI_21614527-S	NM_030662.2	MAP2K2	Homo sapiens mitogen-activated protein kinase kinase 2 (MAP2K2), mRNA.	go_component: extracellular [goid 0005576] [evidence NAS] [pmid 8388392]; go_function: protein-tyrosine kinase activity [goid 0004713] [evidence IEA]; go_function: ATP binding [goid 0005524] [evidence NAS]; go_function: protein serine/threonine kinase activity [goid 0004674] [evidence NAS]; go_function: transferase activity [goid 0016740] [evidence IEA]; go_process: protein amino acid phosphoryla…	4447.8	1175.1	1281.3	2418.3	3851.5	2061.9	3382.2	3774.5	3116.9	3365.6	3836.7	3410.1	1037.8	1006.1	10601.6	751.9	725.1	5540.9	4751.6	2063
214	GI_27754197-S	NM_173711.1	MTND4	Homo sapiens NADH dehydrogenase 4 (MTND4), mRNA.	go_component: mitochondrial electron transport chain [goid 0005746] [evidence E]; go_component: NADH dehydrogenase complex (ubiquinone) (sensu Eukarya) [goid 0005748] [evidence IEA]; go_component: mitochondrion [goid 0005739] [evidence IEA]; go_component: respiratory chain complex I (sensu Eukarya) [goid 0005747] [evidence NAS] [pmid 3921850]; go_function: electron transporter activity [goid 0005…	3913	628.3	733.2	1147.9	2924.7	800	3339.7	4155	2287.1	3170.2	9979	3087.8	939.4	646.1	12120	1073.6	951.7	4159.3	5600	685.6
215	GI_21071024-S	NM_003542.3	HIST1H4C	Homo sapiens histone 1, H4c (HIST1H4C), mRNA.		3067.5	1116.4	1280.5	2065.3	3160.4	3112	2648.3	8091.7	3835.3	4513.3	1254.2	2576.3	59.7	56	9766.5	31.7	34.6	10330.5	3977.4	1249.3
216	GI_31377537-S	NM_145280.3	LOC151194	Homo sapiens similar to hepatocellular carcinoma-associated antigen HCA557b (LOC151194), mRNA.		2486.6	558.8	626.6	1869.2	3124.2	1011.8	1593.6	4463.8	3211.6	3721.7	3886.8	3404.2	838.3	619.6	14813.2	460.6	416.2	7519.8	6289.2	1184.6
217	GI_4502218-S	NM_001665.1	ARHG	Homo sapiens ras homolog gene family, member G (rho G) (ARHG), mRNA.	go_function: Rho small monomeric GTPase activity [goid 0003931] [evidence TAS] [pmid 1620121]; go_function: GTP binding [goid 0005525] [evidence IEA]; go_process: Rho protein signal transduction [goid 0007266] [evidence TAS] [pmid 1620121]; go_process: positive regulation of cell proliferation [goid 0008284] [evidence TAS] [pmid 1620121]; go_process: regulation of cell cycle [goid 0000074] [evide…	3499.2	796.6	953.3	1912.8	3445.3	1056.5	2999.5	2914.1	2616.9	2749.9	4937.5	2974.3	1712.5	1543.4	11278.9	838.8	758.3	5582.4	8387.5	984.3
218	GI_8051583-S	NM_002003.2	FCN1	Homo sapiens ficolin (collagen/fibrinogen domain containing) 1 (FCN1), mRNA.	go_function: lectin [goid 0005530] [evidence E] [pmid 8576206]; go_function: opsonin activity [goid 0008229] [evidence E] [pmid 8576206]; go_function: plasma protein [goid 0005209] [evidence P] [pmid 8947836]; go_function: calcium ion binding [goid 0005509] [evidence P] [pmid 8576206]; go_process: opsinization [goid 0008228] [evidence P] [pmid 8576206]; go_process: antimicrobial humoral response …	4225.8	1148.9	1267.7	2790.2	2837.7	1048.3	3535.2	3322.7	1991.7	3471.1	3619.9	1957.4	1291.8	1252	15626.1	587	550.4	3476.6	6723.7	760.2
219	GI_23238209-A	NM_005731.2	ARPC2	Homo sapiens actin related protein 2/3 complex, subunit 2, 34kDa (ARPC2), transcript variant 2, mRNA.	go_component: Arp2/3 protein complex [goid 0005885] [evidence P] [pmid 9230079]; go_component: actin cytoskeleton [goid 0015629] [evidence P] [pmid 9230079]; go_function: structural constituent of cytoskeleton [goid 0005200] [evidence P] [pmid 9230079]; go_process: cell motility [goid 0006928] [evidence P] [pmid 9230079]	3474.5	1088.2	1247.7	2705.5	4155.4	1669.4	2925.8	5017.7	2960.3	3913.1	3685.3	2300.9	1690.4	1562.9	7251.5	738.7	743.7	7091.6	5934.8	939.2
220	GI_18390348-S	NM_000972.2	RPL7A	Homo sapiens ribosomal protein L7a (RPL7A), mRNA.	go_component: cytosolic large ribosomal subunit (sensu Eukarya) [goid 0005842] [evidence TAS] [pmid 8360149]; go_component: ribosome [goid 0005840] [evidence IEA]; go_component: intracellular [goid 0005622] [evidence IEA]; go_function: structural protein of ribosome [goid 0003735] [evidence P] [pmid 8360149]; go_function: RNA binding [goid 0003723] [evidence TAS] [pmid 8360149]; go_function: stru…	2974.8	1060.1	1291.1	3236.2	2786.2	2217.6	2566.6	3811.2	3238.3	3267.8	4078.2	2677.3	1211.1	1317.7	7925.7	877	785.1	8647	6353.5	737
221	GI_29171680-S	NM_001557.2	IL8RB	Homo sapiens interleukin 8 receptor, beta (IL8RB), mRNA.	go_component: cytoplasm [goid 0005737] [evidence TAS] [pmid 10878382]; go_component: integral to plasma membrane [goid 0005887] [evidence TAS] [pmid 8194768]; go_component: plasma membrane [goid 0005886] [evidence E]; go_function: interleukin-8 receptor activity [goid 0004918] [evidence TAS] [pmid 10820279]; go_function: signal transducer activity [goid 0004871] [evidence TAS] [pmid 10820279]; go…	3350.4	1129	1219.1	2001.2	4609.9	1621.5	2910.6	6120	2185.3	2703.4	3674	3179	1469.2	978.7	7467.7	624	460.8	5927.8	8232.7	886.6
222	GI_42516575-S	NM_016417.2	C14orf87	Homo sapiens chromosome 14 open reading frame 87 (C14orf87), mRNA.		2067.3	3174.4	3556.1	2121.8	1721.4	2816.6	1830.6	1740.2	1618.1	1603.4	1841	1073.6	2848.1	2696.3	5863.8	1103.9	1060.3	12605.9	4802.8	3951.3
223	GI_24797075-S	NM_002121.4	HLA-DPB1	Homo sapiens major histocompatibility complex, class II, DP beta 1 (HLA-DPB1), mRNA.	go_function: class II major histocompatibility complex antigen [goid 0003821] [evidence E] [pmid 8105536]; go_process: perception of pest/pathogen/parasite [goid 0009596] [evidence E] [pmid 8105536]; go_process: pathogenesis [goid 0009405] [evidence E] [pmid 8105536]	3235.6	1275.7	1500.5	3033.6	2283.4	1614.9	2409.6	4770.1	2373.4	3138.7	2190	2257	1660.7	1621.2	12277.6	617.9	664.2	7589.5	4814.1	647.1
224	GI_16117790-S	NM_000996.2	RPL35A	Homo sapiens ribosomal protein L35a (RPL35A), mRNA.	go_component: cytosolic large ribosomal subunit (sensu Eukarya) [goid 0005842] [evidence NR]; go_component: ribosome [goid 0005840] [evidence IEA]; go_component: intracellular [goid 0005622] [evidence IEA]; go_function: structural protein of ribosome [goid 0003735] [evidence NR]; go_function: RNA binding [goid 0003723] [evidence NR]; go_function: structural constituent of ribosome [goid 0003735] …	2468.8	1386.4	1473.6	3063.1	2444.7	2852.3	2231.9	5148.7	2763.3	3165.3	3901.1	2395	1254.1	1300.9	6956.4	733.3	740.9	8609.1	5752.3	1006
225	GI_14591915-S	NM_001023.2	RPS20	Homo sapiens ribosomal protein S20 (RPS20), mRNA.	go_component: cytosolic small ribosomal subunit (sensu Eukarya) [goid 0005843] [evidence TAS] [pmid 8479924]; go_component: intracellular [goid 0005622] [evidence IEA]; go_function: structural protein of ribosome [goid 0003735] [evidence P] [pmid 8479924]; go_function: RNA binding [goid 0003723] [evidence TAS] [pmid 8479924]; go_function: structural constituent of ribosome [goid 0003735] [evidenc…	3532.4	866.3	899.4	3307.5	3952.6	2700.5	3028.4	4902.5	3648.3	4726.1	4720.1	2766.2	851.3	829.5	6677	579.7	576.2	6107.6	3783	960.6
226	GI_15718686-S	NM_001005.2	RPS3	Homo sapiens ribosomal protein S3 (RPS3), mRNA.	go_component: cytosolic small ribosomal subunit (sensu Eukarya) [goid 0005843] [evidence TAS] [pmid 1712897]; go_component: intracellular [goid 0005622] [evidence IEA]; go_function: structural protein of ribosome [goid 0003735] [evidence P] [pmid 1712897]; go_function: RNA binding [goid 0003723] [evidence TAS] [pmid 1712897]; go_function: structural constituent of ribosome [goid 0003735] [evidenc…	2260.5	1559.9	1638.4	2714.7	2793.1	2107.2	2145.1	3226.1	3768.2	2680.3	3522.6	1565.4	1761.2	1464	5874.5	1064.5	962.1	11130.8	6520.8	616.5
227	GI_37622354-S	NM_003666.2	BLZF1	Homo sapiens basic leucine zipper nuclear factor 1 (JEM-1) (BLZF1), mRNA.	go_component: nucleus [goid 0005634] [evidence TAS] [pmid 9129147]; go_function: RNA polymerase II transcription factor activity [goid 0003702] [evidence TAS] [pmid 9129147]; go_process: regulation of transcription from Pol II promoter [goid 0006357] [evidence TAS] [pmid 9129147]; go_process: cell proliferation [goid 0008283] [evidence TAS] [pmid 9129147]	3040.5	539.4	621.9	2281.6	2853.7	1097.4	2233.6	6190.6	2333.2	4046.6	2870.1	3664.7	450.8	290.2	15223.2	212.2	168.8	5187.7	4624.5	1307
228	GI_8923089-S	NM_017658.1	BTBD5	Homo sapiens BTB (POZ) domain containing 5 (BTBD5), mRNA.	go_function: protein binding [goid 0005515] [evidence IEA]	2899.9	279.5	359.7	1954.8	2829.8	821.7	1929.5	6286.4	2794.4	4548.8	3148	4158.5	384.5	204.7	16283.2	182.2	140	4642.8	4156	1222.8
229	GI_27734700-S	NM_173602.1	FLJ34278	Homo sapiens hypothetical protein FLJ34278 (FLJ34278), mRNA.		2833.4	358.7	446.2	2153.9	3429.2	1069.8	2134.8	5667.7	2889.5	4712.3	3445.6	3956.1	423.1	328	12312	206.4	178.5	5559.3	4884.6	1412.9
230	GI_31542987-S	NM_021999.2	ITM2B	Homo sapiens integral membrane protein 2B (ITM2B), mRNA.	go_component: membrane fraction [goid 0005624] [evidence NR]; go_component: integral to plasma membrane [goid 0005887] [evidence NR]; go_function: structural molecule activity [goid 0005198] [evidence IEA]; go_process: neurogenesis [goid 0007399] [evidence TAS] [pmid 10391242]; go_process: hearing [goid 0007605] [evidence IEA]	3313.1	1435.5	1612.8	1804	2501.7	1029.1	3324.5	5597.2	2401.3	3069	3969.6	2334.9	1771.4	786.7	5114.5	843.3	813.2	6006.2	9777.7	676.1
231	GI_32698751-S	NM_022106.1	C20orf177	Homo sapiens chromosome 20 open reading frame 177 (C20orf177), mRNA.		2779.2	584.1	722.7	2418.2	2736.2	1234.6	1793.5	6364	2126.6	4275.7	2710.1	2998.9	414.5	355.7	15741	170.9	179.9	4714.1	4625.2	930.9
232	GI_42659734-S	XM_374911.1	LOC399927	Homo sapiens similar to ribosomal protein S12 (LOC399927), mRNA.		2580	1518.8	1853.5	2566.7	2781	2671.5	1879.8	2482.8	3779.1	2680.4	2705.2	2304.7	1101.9	837.9	9404.2	814.4	792.1	8658.4	4793.7	1586.5
233	GI_37538629-S	XM_171171.2	LOC255374	Homo sapiens similar to CG9117-PA (LOC255374), mRNA.		3268.5	450.2	524.1	2520	2925.1	1338.6	1924.3	5335.2	2352.3	4020.7	2552.2	3520.9	430.7	371.3	13840.8	216.5	194.3	5705.4	5078.2	1119.6
234	GI_42660956-S	XM_290670.4	KIAA0220	Homo sapiens KIAA0220 protein (KIAA0220), mRNA.		2868.4	692.9	718.1	2077.4	4021.3	745.3	2657.2	4839.9	2438	4187.4	4834.8	2877.4	914.8	966.7	13220.2	437.2	419.7	4584.4	2938.6	1087.7
235	GI_15431298-S	NM_000979.2	RPL18	Homo sapiens ribosomal protein L18 (RPL18), mRNA.	go_component: cytosolic large ribosomal subunit (sensu Eukarya) [goid 0005842] [evidence TAS] [pmid 8218404]; go_component: ribosome [goid 0005840] [evidence IEA]; go_component: intracellular [goid 0005622] [evidence IEA]; go_function: structural protein of ribosome [goid 0003735] [evidence P] [pmid 8218404]; go_function: RNA binding [goid 0003723] [evidence TAS] [pmid 8218404]; go_function: stru…	2864	1218.4	1357.7	2343.3	3157.2	1675.2	2683.5	3936	3192.5	3321.1	4138.8	2540.4	979.6	1029.9	10278	496.9	480.7	6084.1	4935.8	632.2
236	GI_41393589-S	NM_006716.3	ASK	Homo sapiens activator of S phase kinase (ASK), mRNA.	go_component: intracellular [goid 0005622] [evidence IEA]; go_function: enzyme activator activity [goid 0008047] [evidence E] [pmid 10373557]; go_function: nucleic acid binding [goid 0003676] [evidence IEA]; go_function: zinc ion binding [goid 0008270] [evidence IEA]; go_function: kinase activity [goid 0016301] [evidence IEA]; go_process: G1/S transition of mitotic cell cycle [goid 0000082] [evid…	2747.7	299.1	392.4	1439.7	2781.5	820.2	2093	5924.3	2494.6	4118.4	3055.6	3620.5	440	365.8	14770.8	206.1	208.3	5243.6	4581.8	1125.4
237	GI_40254826-S	NM_005594.2	NACA	Homo sapiens nascent-polypeptide-associated complex alpha polypeptide (NACA), mRNA.	go_component: nascent polypeptide-associated complex [goid 0005854] [evidence TAS] [pmid 8047162]; go_component: cytoplasm [goid 0005737] [evidence E] [pmid 8047162]; go_process: nascent polypeptide association [goid 0006444] [evidence TAS] [pmid 8047162]; go_process: protein biosynthesis [goid 0006412] [evidence TAS] [pmid 8047162]	2829.8	1549.5	1802.8	2424.2	3187.7	1849.7	2533.3	1079.7	2765.7	2677.4	3361.9	2127.3	1748.6	1494	7705.8	1030.4	1045.4	8122.3	5440.8	867
238	GI_42475556-S	NM_005770.3	SERF2	Homo sapiens small EDRK-rich factor 2 (SERF2), mRNA.	go_process: pathogenesis [goid 0009405] [evidence TAS] [pmid 9731538]	2312.9	1054.6	1212	3088.8	2079.2	3166.9	1830	2947	2875.8	2755	2430.3	1883.9	1296.6	1312.6	7920.4	873.3	803.2	7839.2	6550.7	1346.3
239	GI_22218618-S	NM_015397.1	KIAA1892	Homo sapiens KIAA1892 (KIAA1892), mRNA.		2568.2	1965.3	2232.8	1661.9	2182.1	2114.1	2174.8	2210.6	1811.4	1665	1561.4	1603.9	1709.4	1359.7	4983.6	997	871.4	12083.2	5901.1	3649.3
240	GI_4502662-S	NM_001774.1	CD37	Homo sapiens CD37 antigen (CD37), mRNA.	go_component: integral to plasma membrane [goid 0005887] [evidence P] [pmid 2466944]; go_component: plasma membrane [goid 0005886] [evidence P] [pmid 2466944]; go_process: N-linked glycosylation [goid 0006487] [evidence P] [pmid 2466944]	2821.1	638.1	710.1	1295.7	2494.3	685.8	2297.3	2264.2	2255.7	2372.8	4098.7	2014.6	1458.8	1288.9	11224.4	898.7	895.3	7402.8	7202.6	577.6
241	GI_17105395-S	NM_000992.2	RPL29	Homo sapiens ribosomal protein L29 (RPL29), mRNA.	go_component: cytosolic large ribosomal subunit (sensu Eukarya) [goid 0005842] [evidence P] [pmid 8597591]; go_function: heparin binding [goid 0008201] [evidence E] [pmid 8662616]; go_function: structural protein of ribosome [goid 0003735] [evidence P] [pmid 8597591]; go_function: RNA binding [goid 0003723] [evidence P] [pmid 8597591]; go_process: embryo implantation [goid 0007566] [evidence P] […	2301.2	926.2	1199.1	2139.4	2195.5	1726.6	1882.1	2743.4	2597.2	2625.8	3051.3	2007.2	1229.9	1220	9593.7	837.6	788.7	8845.1	6180.2	569.3
242	GI_14149616-S	NM_005437.1	NCOA4	Homo sapiens nuclear receptor coactivator 4 (NCOA4), mRNA.	go_component: nucleus [goid 0005634] [evidence P] [pmid 8643607]; go_function: transcription co-activator activity [goid 0003713] [evidence E] [pmid 8643607]; go_process: male gonad development [goid 0008584] [evidence P] [pmid 8643607]; go_process: oncogenesis [goid 0007048] [evidence NR]	2145.9	2141.6	2320.7	1805.1	2398.9	2047.9	1988.8	5095.3	1904.6	2145.4	1967.6	1352	1929.5	1342.7	3529	819.9	703.4	10393.1	5682.5	2885.4
243	GI_16306560-S	NM_000997.2	RPL37	Homo sapiens ribosomal protein L37 (RPL37), mRNA.	go_component: cytosolic large ribosomal subunit (sensu Eukarya) [goid 0005842] [evidence TAS] [pmid 7545944]; go_component: ribosome [goid 0005840] [evidence IEA]; go_component: intracellular [goid 0005622] [evidence IEA]; go_function: structural protein of ribosome [goid 0003735] [evidence P] [pmid 7545944]; go_function: RNA binding [goid 0003723] [evidence TAS] [pmid 7545944]; go_function: stru…	3565.4	749.6	825.9	2531.4	3587.9	2944.9	3051.6	3782.8	3342.3	3940.9	3132.5	2438.1	388.2	330.3	10347.6	290.2	274.9	5814.1	2398.3	813.8
244	GI_16507965-S	NM_001428.2	ENO1	Homo sapiens enolase 1, (alpha) (ENO1), mRNA.	go_function: phosphopyruvate hydratase activity [goid 0004634] [evidence E] [pmid 3529090]; go_function: transcription co-repressor activity [goid 0003714] [evidence E]; go_function: DNA binding [goid 0003677] [evidence NR]; go_function: transcription factor activity [goid 0003700] [evidence E]; go_process: negative regulation of transcription from Pol II promoter [goid 0000122] [evidence E]	2729.3	894.4	1082.6	1738	3121.8	888.4	2425.6	3266	2211.2	2476.6	3547.9	2076.3	1506.3	1273.9	9628	681.8	697.9	6916.4	6642.4	667.9
245	GI_17158043-S	NM_001010.2	RPS6	Homo sapiens ribosomal protein S6 (RPS6), mRNA.	go_component: cytosolic small ribosomal subunit (sensu Eukarya) [goid 0005843] [evidence TAS] [pmid 1301164]; go_component: ribosome [goid 0005840] [evidence IEA]; go_component: intracellular [goid 0005622] [evidence IEA]; go_function: structural protein of ribosome [goid 0003735] [evidence P] [pmid 1301164]; go_function: RNA binding [goid 0003723] [evidence TAS] [pmid 1301164]; go_function: stru…	2394.5	1446.3	1763.8	2425.8	2679.6	1877	2258.2	2535.1	2419.7	2477.4	3615.1	1954.3	1528.8	1417.5	7973.7	1054.8	914.9	7473.2	5731.6	509.8
246	GI_38093646-S	NM_198276.1	TMEM17	Homo sapiens transmembrane protein 17 (TMEM17), mRNA.		2106.8	596.4	734.8	1765.7	2112	793.9	1525.4	3337.8	2819.9	3146.4	3439.8	3155.1	752	684.1	10273	376.8	407.1	8584.2	6528.1	1271.2
247	GI_20336333-A	NM_001191.2	BCL2L1	Homo sapiens BCL2-like 1 (BCL2L1), nuclear gene encoding mitochondrial protein, transcript variant 2, mRNA.	go_component: integral to membrane [goid 0016021] [evidence IEA]; go_component: mitochondrion [goid 0005739] [evidence TAS] [pmid 10365962]; go_function: apoptosis inhibitor activity [goid 0008189] [evidence TAS] [pmid 10802717]; go_process: apoptotic mitochondrial changes [goid 0008637] [evidence TAS] [pmid 9393856]; go_process: negative regulation of survival gene products [goid 0008634] [evide…	2907.3	886.7	1022.2	1227	1849.7	1045.2	2170.8	1190.7	1836.3	1916.4	2567.4	1620.7	1811.6	1643.9	7190.1	1689.2	1519.8	10629.1	5228.3	3723.1
248	GI_14591914-S	NM_001022.2	RPS19	Homo sapiens ribosomal protein S19 (RPS19), mRNA.	go_component: cytosolic small ribosomal subunit (sensu Eukarya) [goid 0005843] [evidence TAS] [pmid 9988267]; go_component: ribosome [goid 0005840] [evidence IEA]; go_component: intracellular [goid 0005622] [evidence IEA]; go_function: structural protein of ribosome [goid 0003735] [evidence P]; go_function: RNA binding [goid 0003723] [evidence TAS] [pmid 9988267]; go_function: structural constitu…	2493.7	808.7	982.9	2541.9	2636.7	2570.1	2371.5	3256.7	2670.3	3395.9	3517.6	2393.2	1231.9	1086.8	8085.1	694.1	651.6	6746.3	4608.4	580.3
249	GI_18426899-A	NM_080426.1	GNAS	Homo sapiens GNAS complex locus (GNAS), transcript variant 2, mRNA.	go_component: peripheral plasma membrane protein [goid 0000157] [evidence P]; go_component: Golgi trans cisterna [goid 0000138] [evidence E]; go_component: plasma membrane [goid 0005886] [evidence E]; go_function: heterotrimeric G-protein GTPase, alpha-subunit [goid 0000263] [evidence E]; go_process: Golgi to secretory vesicle transport [goid 0006894] [evidence P]; go_process: olfaction [goid 000…	2863	755	925	1483.1	3649.8	903.1	2531.6	3040.2	2753.8	2812.3	4076.2	2456.2	1053.7	912.6	6495	804.1	797.3	5483.6	7858.6	1504.2
250	GI_17986282-S	NM_006009.2	TUBA3	Homo sapiens tubulin, alpha 3 (TUBA3), mRNA.	go_component: microtubule [goid 0005874] [evidence NR]; go_function: structural constituent of cytoskeleton [goid 0005200] [evidence NR]; go_process: glia cell differentiation [goid 0007404] [evidence P] [pmid 3839072]; go_process: cell shape and cell size control [goid 0007148] [evidence NR]; go_process: neurogenesis [goid 0007399] [evidence P]	2674.1	1047.8	1210.3	2193.2	3287.7	1946.2	2565.7	5140.8	1935.3	2402.1	3099.2	2575.1	1602.5	1353.5	8065.4	558.8	518.2	4373.7	5386.3	923.8
251	GI_13376853-S	NM_025241.1	UBXD1	Homo sapiens UBX domain containing 1 (UBXD1), mRNA.		2254.1	1084.1	1257.3	3385.1	2675.3	2751.2	1975.8	1605.9	3845.8	2337.9	2137.1	1059	967.2	974.6	7644.5	989.2	986	6472.1	6362.7	2084.9
252	GI_7549801-S	NM_004323.2	BAG1	Homo sapiens BCL2-associated athanogene (BAG1), mRNA.	go_component: cytoplasm [goid 0005737] [evidence TAS] [pmid 8947043]; go_function: apoptosis inhibitor activity [goid 0008189] [evidence TAS] [pmid 7834747]; go_function: receptor signaling protein activity [goid 0005057] [evidence TAS] [pmid 8947043]; go_function: protein binding [goid 0005515] [evidence IEA]; go_function: chaperone activity [goid 0003754] [evidence IEA]; go_process: anti-apopto…	2552.1	1027.7	1216.3	2370.4	3074.6	1602.4	2037.1	1973.8	3979.4	2392	3178.1	1591.9	1589.5	1618.5	7027.3	1339.6	1220.4	7184.8	4198.3	1564.9
253	GI_37538751-S	XM_069734.2	LOC136143	Homo sapiens similar to ribosomal protein L18; 60S ribosomal protein L18 (LOC136143), mRNA.		2141	858.3	1070.8	2120	2247.3	1379.7	1900.9	2721.4	2509.7	2828.4	3133.6	1940.6	1312	1284.3	10918.4	516.7	554.1	6934.3	5672.9	463.4
254	GI_5032056-S	NM_005620.1	S100A11	Homo sapiens S100 calcium binding protein A11 (calgizzarin) (S100A11), mRNA.	go_component: cytoplasm [goid 0005737] [evidence TAS] [pmid 10851017]; go_component: nucleus [goid 0005634] [evidence TAS] [pmid 10851017]; go_function: calcium ion binding [goid 0005509] [evidence NR]; go_process: negative regulation of DNA replication [goid 0008156] [evidence TAS] [pmid 10851017]; go_process: negative regulation of cell proliferation [goid 0008285] [evidence TAS] [pmid 10851017…	2513.7	613.6	788.4	1402.4	2871.8	1161.7	2252.7	3492	1824	2359.6	3550.7	2551.4	1278.3	1047.9	11770.7	389.6	392.3	4472.3	7032.5	703.9
255	GI_23397450-S	NM_153206.1	AMICA	Homo sapiens adhesion molecule AMICA (AMICA), mRNA.		2390.6	999.1	1249.5	2821.5	3307.1	2014.5	2001.8	5014.2	2075.8	2727.3	2807.1	1979.8	1301.2	1242.3	8045.6	575.3	566.3	4605.4	5301.7	813.5
256	GI_34577109-A	NM_184041.1	ALDOA	Homo sapiens aldolase A, fructose-bisphosphate (ALDOA), transcript variant 2, mRNA.	go_function: fructose-bisphosphate aldolase activity [goid 0004332] [evidence TAS] [pmid 2825199]; go_function: lyase activity [goid 0016829] [evidence IEA]; go_process: fructose metabolism [goid 0006000] [evidence TAS] [pmid 2825199]; go_process: striated muscle contraction [goid 0006941] [evidence TAS] [pmid 8598869]; go_process: glycolysis [goid 0006096] [evidence TAS] [pmid 2825199]	2869.9	502.6	602	1850.8	2897.4	973.7	2649.3	2988.3	2546.4	2601.3	6074.6	2481.1	1190	1066.9	9269.3	663.5	621.5	3933.6	5158.1	790.8
257	GI_23397559-S	NM_153263.1	ZNF549	Homo sapiens zinc finger protein 549 (ZNF549), mRNA.	go_component: intracellular [goid 0005622] [evidence IEA]; go_function: nucleic acid binding [goid 0003676] [evidence IEA]; go_process: regulation of transcription, DNA-dependent [goid 0006355] [evidence IEA]	2203.6	587.5	616.2	1633.8	2481.6	920.9	1367.8	3251.3	3156.9	3483.8	3357.1	2750.9	713.4	718.5	9014.3	430.2	393.9	6937.1	6455.3	1201.2
258	GI_17738314-S	NM_006835.2	CCNI	Homo sapiens cyclin I (CCNI), mRNA.	go_function: cyclin-dependent protein kinase, intrinsic regulator activity [goid 0016538] [evidence IEA]; go_process: spermatogenesis [goid 0007283] [evidence NAS] [pmid 9705831]	2205.5	1292.2	1468.5	1443.2	2538.4	992.4	2192.8	2701.8	2005.8	2620.7	3402.8	2141.5	1319	1207.3	7060.8	1131.2	1069.1	6837.1	6364.8	1610.9
259	GI_17105393-S	NM_000984.2	RPL23A	Homo sapiens ribosomal protein L23a (RPL23A), mRNA.	go_component: cytosolic large ribosomal subunit (sensu Eukarya) [goid 0005842] [evidence TAS] [pmid 9417910]; go_component: ribosome [goid 0005840] [evidence IEA]; go_component: intracellular [goid 0005622] [evidence IEA]; go_function: structural protein of ribosome [goid 0003735] [evidence P] [pmid 9417910]; go_function: RNA binding [goid 0003723] [evidence P] [pmid 9417910]; go_function: struct…	2491.1	1330.6	1361.5	2539.9	2487.5	2055.8	2387	1725.3	2298.9	2828.9	3391.9	2352.2	1152.7	1329.4	9055.6	837.3	799.2	6491	4004.6	638.8
260	GI_16306563-S	NM_001000.2	RPL39	Homo sapiens ribosomal protein L39 (RPL39), mRNA.	go_component: cytosolic large ribosomal subunit (sensu Eukarya) [goid 0005842] [evidence P] [pmid 8764829]; go_function: structural protein of ribosome [goid 0003735] [evidence P] [pmid 8764829]; go_function: RNA binding [goid 0003723] [evidence P] [pmid 8764829]; go_process: protein biosynthesis [goid 0006412] [evidence P] [pmid 8764829]	1685.6	1026.1	1116.9	2272.9	2672.7	1725.3	1349.4	8699.2	3066.6	3293.2	3118.6	836.5	1422.6	893.4	3977.5	644.7	447.9	7525	4900.9	785
261	GI_17978488-A	NM_001784.2	CD97	Homo sapiens CD97 antigen (CD97), transcript variant 2, mRNA.	go_component: integral to plasma membrane [goid 0005887] [evidence P]; go_component: plasma membrane [goid 0005886] [evidence E]; go_function: G-protein coupled receptor activity [goid 0004930] [evidence P]; go_function: transmembrane receptor activity [goid 0004888] [evidence P] [pmid 7636245]; go_process: G-protein coupled receptor protein signaling pathway [goid 0007186] [evidence P]; go_proce…	3481.5	912	1020.2	1791.3	3457.6	917.7	2951	3028.5	2206.1	3327.3	2848.4	2702.4	1331	1295	7667	618.1	576.4	5763.4	4324.4	944.5
262	GI_27886558-I	NM_173164.1	NFATC3	Homo sapiens nuclear factor of activated T-cells, cytoplasmic, calcineurin-dependent 3 (NFATC3), transcript variant 4, mRNA.	go_component: nucleus [goid 0005634] [evidence IEA]; go_function: transcription activating factor [goid 0003710] [evidence E] [pmid 7739550]; go_function: transcription co-activator activity [goid 0003713] [evidence NR]; go_function: transcription factor activity [goid 0003700] [evidence IEA]; go_function: translation regulator activity [goid 0045182] [evidence IEA]; go_process: regulation of tra…	2754.1	402.8	438.9	2586.5	2325.5	1016.7	1831.3	5006.3	2156.9	3298.8	2257.1	3007.6	355.1	222.2	14441.6	154.6	146	3955.8	3863.3	870.1
263	GI_12545399-S	NM_002162.2	ICAM3	Homo sapiens intercellular adhesion molecule 3 (ICAM3), mRNA.	go_component: proteoglycan integral to plasma membrane [goid 0005888] [evidence TAS] [pmid 8459213]; go_component: integral to membrane [goid 0016021] [evidence IEA]; go_component: plasma membrane [goid 0005886] [evidence NR] [pmid 1448173]; go_component: integral to plasma membrane [goid 0005887] [evidence TAS]; go_function: integrin binding [goid 0005178] [evidence TAS] [pmid 1448174]; go_funct…	2695.7	830.8	919.1	1593.3	2162.6	979.4	2127.9	3237	1967	2134.1	4536.6	1925.6	1668.6	1624	9526	958.3	969	4730.8	5791.2	520.6
264	GI_4505732-S	NM_002619.1	PF4	Homo sapiens platelet factor 4 (chemokine (C-X-C motif) ligand 4) (PF4), mRNA.	go_component: extracellular [goid 0005576] [evidence IC]; go_function: chemokine activity [goid 0008009] [evidence TAS]; go_function: heparin binding [goid 0008201] [evidence IDA]; go_process: chemotaxis [goid 0006935] [evidence IEA]; go_process: immune response [goid 0006955] [evidence IEA]; go_process: negative regulation of angiogenesis [goid 0016525] [evidence IDA]; go_process: cytokine and c…	2685.1	1187	1412.1	1609	5521.8	2557.1	2099.6	1557.5	3250.2	1785.6	3507.7	3699.8	1237.4	1106.5	5979.9	656.5	605.6	3033	6151.4	1135
265	GI_22907055-S	NM_005720.2	ARPC1B	Homo sapiens actin related protein 2/3 complex, subunit 1B, 41kDa (ARPC1B), mRNA.	go_component: Arp2/3 protein complex [goid 0005885] [evidence TAS] [pmid 9230079]; go_component: actin cytoskeleton [goid 0015629] [evidence P] [pmid 9230079]; go_function: structural constituent of cytoskeleton [goid 0005200] [evidence TAS] [pmid 9230079]; go_process: cell motility [goid 0006928] [evidence TAS] [pmid 9230079]	2301.4	959.8	1062.5	1321.7	2660.1	835.4	1989	2836.5	2506.3	2560.2	3306.5	2056.9	1191.4	1098.7	7569.8	725.6	718.5	6009.4	7763.1	630.9
266	GI_4758913-S	NM_004862.1	LITAF	Homo sapiens lipopolysaccharide-induced TNF factor (LITAF), mRNA.	go_component: nucleus [goid 0005634] [evidence IEA]; go_function: RNA polymerase II transcription factor activity [goid 0003702] [evidence TAS] [pmid 10200294]; go_process: regulation of transcription from Pol II promoter [goid 0006357] [evidence TAS] [pmid 10200294]	1893.5	1221	1406.8	1207	2447.8	679.2	1577.2	2342.1	1665.9	1674.6	2976.7	1696.8	2096.8	2089.4	5285.3	934.9	826.9	8141.8	9329.9	609.6
267	GI_8923658-S	NM_017946.1	FKBP14	Homo sapiens FK506 binding protein 14, 22 kDa (FKBP14), mRNA.	go_component: endoplasmic reticulum [goid 0005783] [evidence IEA]; go_function: cyclophilin [goid 0004600] [evidence IEA]; go_function: calcium ion binding [goid 0005509] [evidence IEA]; go_function: isomerase activity [goid 0016853] [evidence IEA]; go_function: FK506-sensitive peptidyl-prolyl cis-trans isomerase [goid 0030051] [evidence IEA]; go_function: cyclophilin-type peptidyl-prolyl cis-tra…	2098.2	349.2	416.8	1217.1	2238.9	687.1	1442.2	3494.9	2388.4	3168	3071.6	3296.6	585.5	423.9	10268.5	272.9	248.4	7309.2	5771.4	1156.9
268	GI_25952070-I	NM_172024.1	ABCC13	Homo sapiens ATP-binding cassette, sub-family C (CFTR/MRP), member 13 (ABCC13), transcript variant 2, mRNA.		2248.6	383.4	457.6	2210.4	2390	913.1	1561.8	4977	2060	3315.4	2485.3	2694.8	338.8	219.1	14728.2	140.8	137.9	3963.5	3584.8	934.1
269	GI_23110961-S	NM_004079.3	CTSS	Homo sapiens cathepsin S (CTSS), mRNA.	go_component: lysosome [goid 0005764] [evidence NR]; go_function: cathepsin S activity [goid 0004218] [evidence TAS] [pmid 1373132]; go_function: hydrolase activity [goid 0016787] [evidence IEA]; go_process: proteolysis and peptidolysis [goid 0006508] [evidence TAS] [pmid 1373132]; go_process: immune response [goid 0006955] [evidence TAS] [pmid 8157683]	3461.1	808	938.1	2723.8	2373.4	1307.3	3241.2	6053	1727.1	2586.5	2582.1	1829.3	1140.2	852.8	3259.2	467.8	417.1	4353.1	8693.5	732.8
270	GI_34147616-S	NM_032204.3	ASC1p100	Homo sapiens ASC-1 complex subunit P100 (ASC1p100), mRNA.		2744.8	1009.9	1204.8	2458.2	3288.8	1751.1	2454.9	1288.9	2320.1	1635.2	1402.6	1281	1135.7	1147	6057.2	806.2	851.9	7818.8	5864.7	2665.4
271	GI_42662043-S	XM_377516.1	LOC401900	Homo sapiens similar to ribosomal protein L28; 60S ribosomal protein L28 (LOC401900), mRNA.		2298.3	169.4	216.5	2343.2	3139.2	1507.1	1708.3	3970.3	2755.8	2868.1	4175.3	3745.8	609.5	228.3	9344.6	291.8	217.8	4579.6	3909.9	695.9
272	GI_30795230-S	NM_006317.3	BASP1	Homo sapiens brain abundant, membrane attached signal protein 1 (BASP1), mRNA.	go_component: cytoskeleton [goid 0005856] [evidence TAS] [pmid 9749536]; go_component: plasma membrane [goid 0005886] [evidence TAS] [pmid 9749536]; go_component: nucleus [goid 0005634] [evidence IEA]; go_function: DNA binding [goid 0003677] [evidence IEA]; go_process: regulation of transcription, DNA-dependent [goid 0006355] [evidence IEA]	2107.9	920.8	1028	1234.3	3620.9	1003.6	1835.4	4172.1	1302.7	1665.2	4558.1	1976.2	1630.2	1367.7	8547.9	409.8	382.7	4643.4	5615.3	745.5
273	GI_37059786-S	NM_005335.3	HCLS1	Homo sapiens hematopoietic cell-specific Lyn substrate 1 (HCLS1), mRNA.	go_component: DNA-directed RNA polymerase II, core complex [goid 0005665] [evidence TAS] [pmid 2587259]; go_function: DNA binding [goid 0003677] [evidence P] [pmid 2587259]; go_function: transcription factor activity [goid 0003700] [evidence TAS] [pmid 2587259]; go_process: regulation of transcription, DNA-dependent [goid 0006355] [evidence TAS] [pmid 2587259]; go_process: intracellular signaling…	2992	720.7	840.4	1411.4	3610.5	1241.9	2693.3	3111.2	2251.3	2744.9	2527.2	2214.5	1376.8	1216.5	8366.4	553	535.4	4549.6	4995.2	785.5
274	GI_38372922-A	NM_198591.1	BSG	Homo sapiens basigin (OK blood group) (BSG), transcript variant 4, mRNA.	go_component: peripheral plasma membrane protein [goid 0000157] [evidence NR]; go_component: integral to membrane [goid 0016021] [evidence IEA]; go_function: signal transducer activity [goid 0004871] [evidence NR]; go_process: cell surface receptor linked signal transduction [goid 0007166] [evidence TAS] [pmid 9767135]	2186.7	939.4	1084.1	888.8	2584.9	649.6	1851	776.6	2694.3	1606.6	4364.6	1332.8	1251.8	1102.9	6640	888	836.3	8662	5120.6	3105
275	GI_37059797-S	NM_030935.3	THG-1	Homo sapiens TSC-22-like (THG-1), mRNA.	go_component: nucleus [goid 0005634] [evidence IEA]; go_function: transcriptional repressor activity [goid 0016564] [evidence NAS] [pmid 10488076]; go_function: transcription factor activity [goid 0003700] [evidence IEA]; go_process: regulation of transcription, DNA-dependent [goid 0006355] [evidence NAS]	2999.7	793.9	885.2	2281.3	3216.3	1366	2505.7	4101.9	2169	2815	3674.1	2750.8	855.3	774	7177	365.7	383.9	3802.1	4496.4	962.1
276	GI_37556023-S	XM_013127.5	LOC157552	Homo sapiens similar to 40S ribosomal protein SA (P40) (34/67 kDa laminin receptor) (Colon carcinoma laminin-binding protein) (NEM/1CHD4) (Multidrug resistance-associated protein MGr1-Ag) (LOC157552), mRNA.		1664.8	1303	1521.1	1761.5	2124.3	1208.8	1503.9	3132	2658.6	2418.9	2729.7	1306.8	1397.8	1392.8	5423.3	852.3	831.3	8830.4	5850.5	442.8
277	GI_31742480-A	NM_139323.2	YWHAB	Homo sapiens tyrosine 3-monooxygenase/tryptophan 5-monooxygenase activation protein, beta polypeptide (YWHAB), transcript variant 2, mRNA.	go_function: protein binding [goid 0005515] [evidence E]; go_function: protein domain specific binding [goid 0019904] [evidence IEA]	1999.1	865.1	956.2	2162	3035.9	1320.6	1833.2	3812.4	1668.7	2412.7	2869	1801.6	1158	1089.3	8221.8	507.7	515	6416.6	4911.9	677.3
278	GI_17437334-S	XM_060328.1	LOC127099	Homo sapiens similar to 60S ACIDIC RIBOSOMAL PROTEIN P1 (LOC127099), mRNA.		2270.8	1085.1	1053.1	1556.9	1824.7	1442	1692.9	3028.1	2195.9	2239.4	3143.1	1901.6	1119.2	1027.4	7401.4	656.8	589.9	6982.1	6349	576.2
279	GI_5032058-S	NM_005621.1	S100A12	Homo sapiens S100 calcium binding protein A12 (calgranulin C) (S100A12), mRNA.	go_component: insoluble fraction [goid 0005626] [evidence TAS] [pmid 7626002]; go_component: cytosol [goid 0005829] [evidence TAS] [pmid 7626002]; go_function: calcium ion binding [goid 0005509] [evidence TAS] [pmid 7626002]; go_function: antifungal peptide activity [goid 0003799] [evidence IEA]; go_process: inflammatory response [goid 0006954] [evidence TAS] [pmid 8619876]; go_process: xenobioti…	2175.7	1129	1245.4	1724.1	4859.6	1245.9	1776.2	9319.9	2539.4	2441	2538.3	712.7	941.2	905.3	5143.9	200.7	204.6	3426.5	4825.7	764.2
280	GI_21359970-S	NM_018571.4	ALS2CR2	Homo sapiens amyotrophic lateral sclerosis 2 (juvenile) chromosome region, candidate 2 (ALS2CR2), mRNA.	go_component: cellular_component unknown [goid 0008372] [evidence ND]; go_function: ATP binding [goid 0005524] [evidence NAS]; go_function: protein kinase activity [goid 0004672] [evidence NAS]; go_function: transferase activity [goid 0016740] [evidence IEA]; go_process: protein amino acid phosphorylation [goid 0006468] [evidence NAS]	2198.6	1314.5	1468.4	2144.2	1706	2082.1	2072.9	1556.4	1835.4	1297.3	1196.4	1247.4	1451	1398.3	4620.8	1155.5	1121	8963	6843.4	2439.4
281	GI_14165467-S	NM_022551.2	RPS18	Homo sapiens ribosomal protein S18 (RPS18), mRNA.	go_component: small ribosomal subunit [goid 0015935] [evidence TAS] [pmid 8441687]; go_component: intracellular [goid 0005622] [evidence IEA]; go_function: structural protein of ribosome [goid 0003735] [evidence P] [pmid 8441687]; go_function: RNA binding [goid 0003723] [evidence TAS] [pmid 8441687]; go_function: structural constituent of ribosome [goid 0003735] [evidence TAS] [pmid 8441687]; go_…	2136.3	769.3	942.6	1869	2433.6	1416	1619.1	5697.2	2785.8	3263.4	2320.5	1670.6	844.2	777.6	7377.8	418.8	402.8	6405.7	4359.7	549
282	GI_31343610-S	NM_175871.2	FLJ35119	Homo sapiens hypothetical protein FLJ35119 (FLJ35119), mRNA.		1999.8	363.2	420.1	1804.8	2221.8	841.9	1469.4	4498.3	2184.8	3573.6	2670.6	2860	364	301.1	12738.1	167.9	164	4454	3956.3	1000.2
283	GI_14591916-S	NM_001028.2	RPS25	Homo sapiens ribosomal protein S25 (RPS25), mRNA.	go_component: cytosolic small ribosomal subunit (sensu Eukarya) [goid 0005843] [evidence TAS] [pmid 1748303]; go_function: structural protein of ribosome [goid 0003735] [evidence P] [pmid 1748303]; go_function: RNA binding [goid 0003723] [evidence TAS] [pmid 1748303]; go_function: structural constituent of ribosome [goid 0003735] [evidence TAS] [pmid 1748303]; go_process: protein biosynthesis [go…	2476.7	938	1191.4	2680.3	3656.1	2418.8	2175.1	2861.5	3549.8	2838.4	2207.5	1221.5	651.2	532.6	6600	395.8	405.4	7491.6	2858.8	876.3
284	GI_7108343-A	NM_006433.2	GNLY	Homo sapiens granulysin (GNLY), transcript variant NKG5, mRNA.	go_component: extracellular space [goid 0005615] [evidence TAS] [pmid 2212946]; go_function: antifungal peptide activity [goid 0003799] [evidence TAS] [pmid 9756476]; go_function: antibacterial peptide activity [goid 0003797] [evidence TAS] [pmid 9756476]; go_process: cellular defense response [goid 0006968] [evidence TAS] [pmid 9756476]; go_process: xenobiotic metabolism [goid 0006805] [evidence…	3832.6	490.3	647.7	5555.5	1117.9	808.6	3252.1	3180.5	1223.1	4627.3	2166	1472.3	706.3	642.5	3929.1	497.9	470.3	8954	3820.4	603.8
285	GI_22027529-S	NM_015627.1	ARH	Homo sapiens LDL receptor adaptor protein (ARH), mRNA.		2601.2	586.3	701.2	2844.3	3322.5	1759.3	1830	1525.4	3412.3	1844.5	2286.8	2259.4	545.2	287.4	7996.8	418.5	380.2	5687.5	5663.7	1808.6
286	GI_8923562-S	NM_017899.1	TSC	Homo sapiens hypothetical protein FLJ20607 (TSC), mRNA.	go_function: calcium ion binding [goid 0005509] [evidence IEA]	2314.9	927.6	1108.6	2298.1	2622.3	1982.2	1825.3	1427	3176.6	2559.8	1224.4	1331.7	1197.4	1206.4	6513.1	770.5	784.6	6433.6	6426.2	1593.1
287	GI_7661565-S	NM_015434.1	DKFZP434B168	Homo sapiens DKFZP434B168 protein (DKFZP434B168), mRNA.		1869.1	294.3	424	1430.1	1753.8	834	1225.6	2153	1904.2	1636	2341.1	2008.3	400.4	177	20615.8	311.4	172.5	3791.6	3248.6	904.9
288	GI_4505054-S	NM_002350.1	LYN	Homo sapiens v-yes-1 Yamaguchi sarcoma viral related oncogene homolog (LYN), mRNA.	go_component: peripheral plasma membrane protein [goid 0000157] [evidence E]; go_function: protein-tyrosine kinase activity [goid 0004713] [evidence P] [pmid 3561390]; go_function: receptor signaling protein tyrosine kinase activity [goid 0004716] [evidence TAS] [pmid 10748115]; go_function: ATP binding [goid 0005524] [evidence IEA]; go_function: transferase activity [goid 0016740] [evidence IEA]…	3254.7	745.2	773.3	1556.2	3372.3	783.2	2718.3	4273.3	1995.4	2703.5	3147	2669.8	1321.6	979	5100.4	379.2	393.8	4427.7	5724.4	943.3
289	GI_14591910-S	NM_001017.2	RPS13	Homo sapiens ribosomal protein S13 (RPS13), mRNA.	go_component: cytosolic small ribosomal subunit (sensu Eukarya) [goid 0005843] [evidence TAS] [pmid 8332508]; go_component: ribosome [goid 0005840] [evidence IEA]; go_component: intracellular [goid 0005622] [evidence IEA]; go_function: structural protein of ribosome [goid 0003735] [evidence P] [pmid 8332508]; go_function: RNA binding [goid 0003723] [evidence TAS] [pmid 8332508]; go_function: stru…	2092	816	861.6	2076.1	2138.4	2014.2	1623.9	3630.1	2196.6	2546.6	3366.4	1944	948.3	888.9	6900.7	539.7	540	7085.5	4298.3	636.1
290	GI_29171756-S	NM_006432.3	NPC2	Homo sapiens Niemann-Pick disease, type C2 (NPC2), mRNA.	go_component: cellular_component unknown [goid 0008372] [evidence ND]; go_function: molecular_function unknown [goid 0005554] [evidence ND]; go_process: biological_process unknown [goid 0000004] [evidence ND]	2278.8	1016.3	1206.9	2296.2	2056.5	1183.8	1860.3	3212.9	1933.8	2936	2377.2	1873.5	1193.7	1177.5	5313.1	555.2	524.9	5146.3	8198.8	609.9
291	GI_4503458-S	NM_003775.1	EDG6	Homo sapiens endothelial differentiation, G-protein-coupled receptor 6 (EDG6), mRNA.	go_component: integral to plasma membrane [goid 0005887] [evidence TAS] [pmid 9790765]; go_function: lipid binding [goid 0008289] [evidence TAS] [pmid 10679247]; go_function: G-protein coupled receptor activity [goid 0004930] [evidence E]; go_function: receptor activity [goid 0004872] [evidence IEA]; go_function: lysosphingolipid and lysophosphatidic acid receptor activity [goid 0001619] [evidenc…	3069.9	676.3	760	2190.4	2824.5	1363.2	2805.1	3125.5	2143.5	2785	2648.7	2706.5	846.3	754.6	7357.5	397.7	352	4361	4800.4	782.4
292	GI_27754199-S	NM_173708.1	MTND1	Homo sapiens NADH dehydrogenase 1 (MTND1), mRNA.	go_component: mitochondrial electron transport chain [goid 0005746] [evidence P] [pmid 9878551]; go_component: mitochondrial inner membrane [goid 0005743] [evidence E]; go_component: respiratory chain complex I (sensu Eukarya) [goid 0005747] [evidence NAS] [pmid 3921850]; go_component: mitochondrion [goid 0005739] [evidence IEA]; go_component: integral to membrane [goid 0016021] [evidence IEA]; g…	2306.5	584.3	688.1	1081.3	2477.8	614.8	1913	1481.7	1373.7	1847.5	7268.8	2698.2	885.9	694.1	9779.6	915.9	867.4	3200.6	5377.3	562.5
293	GI_21327678-S	NM_006886.2	ATP5E	Homo sapiens ATP synthase, H+ transporting, mitochondrial F1 complex, epsilon subunit (ATP5E), nuclear gene encoding mitochondrial protein, mRNA.	go_component: proton-transporting ATP synthase complex (sensu Eukarya) [goid 0005753] [evidence TAS] [pmid 10727396]; go_component: mitochondrion [goid 0005739] [evidence NR]; go_function: hydrogen ion transporter activity [goid 0015078] [evidence IEA]; go_function: hydrogen-transporting two-sector ATPase activity [goid 0003936] [evidence IEA]; go_function: hydrolase activity [goid 0016787] [evid…	1909.2	1161.2	1310.9	2167.1	2832.5	3049.8	1633	2919.8	2461.2	2198.9	2187.4	1143.5	1270.4	1281.9	4986.9	656.8	687.1	6913.1	3670.2	2158.2
294	GI_15718688-A	NM_001006.2	RPS3A	Homo sapiens ribosomal protein S3A (RPS3A), mRNA.	go_component: cytosolic small ribosomal subunit (sensu Eukarya) [goid 0005843] [evidence TAS] [pmid 8647443]; go_component: ribosome [goid 0005840] [evidence IEA]; go_component: intracellular [goid 0005622] [evidence IEA]; go_function: structural protein of ribosome [goid 0003735] [evidence P] [pmid 8647443]; go_function: RNA binding [goid 0003723] [evidence TAS] [pmid 1398113]; go_function: stru…	1452.1	1281.5	1466.6	3037.1	2218.9	1910.1	1393.9	7593	3392.7	3997.3	2055.5	731.7	907.9	791.8	2632.6	416.7	409.7	6265.2	3914.2	564.7
295	GI_5453773-S	NM_006163.1	NFE2	Homo sapiens nuclear factor (erythroid-derived 2), 45kDa (NFE2), mRNA.	go_component: nucleus [goid 0005634] [evidence TAS] [pmid 7774011]; go_function: transcription co-activator activity [goid 0003713] [evidence TAS] [pmid 8355703]; go_function: transcription factor activity [goid 0003700] [evidence TAS] [pmid 8355703]; go_function: translation regulator activity [goid 0045182] [evidence IEA]; go_process: hemostasis [goid 0007599] [evidence TAS] [pmid 7774011]; go_…	2453.7	883.9	1005.9	3088.6	2422.3	2202.4	1975.2	2339.3	1808.3	1863.7	1734.7	1847.5	1095.3	1005.1	6027.7	834	822	6275.8	5548.5	1106.7
296	GI_15431287-S	NM_007104.3	RPL10A	Homo sapiens ribosomal protein L10a (RPL10A), mRNA.	go_component: cytosolic large ribosomal subunit (sensu Eukarya) [goid 0005842] [evidence TAS] [pmid 8607874]; go_component: ribosome [goid 0005840] [evidence IEA]; go_component: intracellular [goid 0005622] [evidence IEA]; go_function: structural constituent of ribosome [goid 0003735] [evidence IEA]; go_process: embryogenesis and morphogenesis [goid 0007345] [evidence TAS] [pmid 7609734]; go_proc…	2266.7	879.9	975.2	2813	2659.4	2129.2	1890.6	3368.4	2581.6	2627.7	3044.5	1864.3	950.5	933.6	5280.9	585.5	559.3	5822.6	4328.8	560.5
297	GI_38327035-S	NM_005326.3	HAGH	Homo sapiens hydroxyacylglutathione hydrolase (HAGH), mRNA.	go_function: hydroxyacylglutathione hydrolase activity [goid 0004416] [evidence TAS] [pmid 8550579]; go_function: hydrolase activity [goid 0016787] [evidence IEA]	2296.9	812.3	908.4	1777.6	1891.5	2098	1945.8	1204.1	2904.5	1660.3	1406.1	1175.4	1303.3	1117.9	7112.9	1030.9	954.6	6723	5327.2	1896.1
298	GI_5174476-S	NM_006082.1	K-ALPHA-1	Homo sapiens tubulin, alpha, ubiquitous (K-ALPHA-1), mRNA.	go_component: microtubule [goid 0005874] [evidence IEA]; go_function: structural molecule activity [goid 0005198] [evidence IEA]; go_function: GTP binding [goid 0005525] [evidence IEA]; go_process: microtubule-based movement [goid 0007018] [evidence IEA]	1902.9	912.3	1065.4	2167.5	2660.8	1338.5	1756.4	5105	1725.6	2306.9	2123.6	1576.3	1270.2	764.9	6755.6	597.3	406.1	5162.3	5297.8	624.2
299	GI_14141192-S	NM_001013.2	RPS9	Homo sapiens ribosomal protein S9 (RPS9), mRNA.	go_component: cytosolic small ribosomal subunit (sensu Eukarya) [goid 0005843] [evidence TAS] [pmid 7772601]; go_component: intracellular [goid 0005622] [evidence IEA]; go_function: structural protein of ribosome [goid 0003735] [evidence P] [pmid 7772601]; go_function: RNA binding [goid 0003723] [evidence TAS] [pmid 7772601]; go_function: structural constituent of ribosome [goid 0003735] [evidenc…	1811.3	929.8	1109.6	1913.5	2288.5	1053.1	1417.1	3328.7	2360.4	2550.4	2865.7	1556.3	1047	1053.8	6333.7	572.7	562.6	6326.4	5361.1	638.8
300	GI_14141189-S	NM_000990.2	RPL27A	Homo sapiens ribosomal protein L27a (RPL27A), mRNA.	go_component: cytosolic large ribosomal subunit (sensu Eukarya) [goid 0005842] [evidence TAS] [pmid 7772601]; go_component: ribosome [goid 0005840] [evidence IEA]; go_component: intracellular [goid 0005622] [evidence IEA]; go_function: structural protein of ribosome [goid 0003735] [evidence P] [pmid 7772601]; go_function: RNA binding [goid 0003723] [evidence TAS] [pmid 7772601]; go_function: stru…	2078.6	1268.5	1469	1755.1	2453.8	1251.8	2051	3170.7	2560.6	2522.9	2975	1654.3	782.8	595.9	7070	428	373.5	5809.7	4093.3	580.4
301	GI_4502418-S	NM_000713.1	BLVRB	Homo sapiens biliverdin reductase B (flavin reductase (NADPH)) (BLVRB), mRNA.	go_function: biliverdin reductase activity [goid 0004074] [evidence TAS] [pmid 8117274]; go_function: oxidoreductase activity [goid 0016491] [evidence IEA]; go_function: flavin reductase activity [goid 0042602] [evidence IEA]	1772.5	978.5	1099.3	2074.1	1709.1	1922.6	1532.2	902.5	2214.6	1320.9	1035.2	1154	1390.7	1555.9	8312.8	757.2	678	7397.3	5698.6	1417.3
302	GI_14141165-A	NM_031989.1	PCBP2	Homo sapiens poly(rC) binding protein 2 (PCBP2), transcript variant 2, mRNA.	go_component: cytoplasm [goid 0005737] [evidence NAS]; go_component: nucleus [goid 0005634] [evidence NAS]; go_component: ribonucleoprotein complex [goid 0030529] [evidence IEA]; go_function: RNA binding [goid 0003723] [evidence IDA] [pmid 7607214]; go_function: DNA binding [goid 0003677] [evidence IEA]; go_process: mRNA metabolism [goid 0016071] [evidence NAS] [pmid 7556077]	2087.7	1124.7	1338.3	1419	2631.1	1123.8	1852.3	2126.8	2084.2	1777.8	3820.9	1587.8	1141.6	1001.2	5812.5	656.6	596.8	6361.3	4968.1	1272
303	GI_40807470-S	NM_003594.3	TTF2	Homo sapiens transcription termination factor, RNA polymerase II (TTF2), mRNA.	go_component: transcription elongation factor complex [goid 0008023] [evidence TAS] [pmid 9748214]; go_function: Pol II transcription termination factor activity [goid 0003717] [evidence TAS] [pmid 9748214]; go_function: DNA dependent ATPase activity [goid 0008094] [evidence TAS] [pmid 9748214]; go_function: ATP binding [goid 0005524] [evidence IEA]; go_function: DNA binding [goid 0003677] [evide…	2031	594.5	633.1	1250.3	1967.2	676.5	1386	3020.7	2224.5	2636.6	2667.7	2476.9	665.2	608.9	8339.5	341.9	327.2	6465.7	5274.8	951.8
304	GI_7661537-S	NM_015379.1	BRI3	Homo sapiens brain protein I3 (BRI3), mRNA.	go_component: integral to membrane [goid 0016021] [evidence IEA]	2625.7	782.1	830.6	2139.6	2513.8	1494.3	2375.4	4207.2	2035.3	3121.9	2855.8	2687.8	947.5	956.8	5502.6	314	321.2	2915	4980.8	726.6
305	GI_39725694-S	NM_001311.3	CRIP1	Homo sapiens cysteine-rich protein 1 (intestinal) (CRIP1), mRNA.	go_component: cytoplasm [goid 0005737] [evidence TAS] [pmid 9126610]; go_function: zinc ion binding [goid 0008270] [evidence TAS] [pmid 9126610]; go_process: cell proliferation [goid 0008283] [evidence TAS] [pmid 9126610]; go_process: antimicrobial humoral response (sensu Invertebrata) [goid 0006960] [evidence TAS] [pmid 9126610]; go_process: antimicrobial humoral response (sensu Vertebrata) [goi…	2539.5	761.7	890.8	1636.2	1838.8	1225.1	1976.9	2548.1	1629.9	3354.9	1833.2	1860.1	1357.1	1242.4	6819.5	422.3	426.5	5200.6	5907.3	669.6
306	GI_23943871-S	NM_022733.1	LOC64744	Homo sapiens hypothetical protein AL133206 (LOC64744), mRNA.	go_component: nucleus [goid 0005634] [evidence IEA]; go_function: DNA binding [goid 0003677] [evidence IEA]	3466.4	532	609.3	1835.5	2610	761.9	2965.6	3545.7	2053.6	3097.7	3178	2261.5	985.7	861.6	5480.1	405.1	390.6	3502.1	4929.7	655.4
307	GI_27436892-I	NM_003190.3	TAPBP	Homo sapiens TAP binding protein (tapasin) (TAPBP), transcript variant 1, mRNA.	go_component: endoplasmic reticulum membrane [goid 0005789] [evidence P] [pmid 9238042]; go_component: integral to membrane [goid 0016021] [evidence P] [pmid 9238042]; go_component: endoplasmic reticulum [goid 0005783] [evidence P] [pmid 9271576]; go_function: peptide antigen transporter activity [goid 0015433] [evidence E] [pmid 9238042]; go_function: MHC-interacting protein [goid 0003822] [evid…	2871.5	609.6	731.7	2116	2471.2	1325.3	2073.2	3494.4	1747.5	2912	2508.1	2284.3	789.9	755.3	8049.8	434.9	442.6	4264.6	3490.9	688
308	GI_15812192-S	NM_012179.2	FBXO7	Homo sapiens F-box only protein 7 (FBXO7), mRNA.	go_component: ubiquitin ligase complex [goid 0000151] [evidence TAS] [pmid 10531035]; go_component: nucleus [goid 0005634] [evidence IEA]; go_function: ubiquitin-protein ligase activity [goid 0004842] [evidence TAS] [pmid 10531035]; go_function: DNA binding [goid 0003677] [evidence IEA]; go_process: ubiquitin-dependent protein catabolism [goid 0006511] [evidence TAS] [pmid 10531035]; go_process: …	2287	1247.4	1429.4	2107.4	1625.4	1352	1961.7	1580.4	1316.7	1296.9	1635.4	1444.5	1194.5	1180.2	5364.5	981.5	1033.9	7746.5	4864.9	2142.4
309	GI_25453476-S	NM_001961.2	EEF2	Homo sapiens eukaryotic translation elongation factor 2 (EEF2), mRNA.	go_function: translation elongation factor activity [goid 0003746] [evidence NR]; go_function: GTP binding [goid 0005525] [evidence IEA]; go_function: protein-synthesizing GTPase activity [goid 0008547] [evidence IEA]; go_process: translational elongation [goid 0006414] [evidence IEA]	2353.2	806.4	962.3	903	1897.7	412.4	2034.6	2144.6	2336.8	1964.2	2912	1727.7	1085.1	987.5	9406.9	644.9	621.4	5335.5	4227.7	565.5
310	GI_34996524-S	NM_194319.1	ZNF542	Homo sapiens zinc finger protein 542 (ZNF542), mRNA.		2043.7	415.7	507.7	1840	2357.8	1147.4	1602.6	4098.3	1927.2	3010.4	2472.1	2638.1	439.1	376.6	8707	211.2	193	4442.6	3787.4	1037.8
311	GI_38505163-A	NM_006908.3	RAC1	Homo sapiens ras-related C3 botulinum toxin substrate 1 (rho family, small GTP binding protein Rac1) (RAC1), transcript variant Rac1, mRNA.	go_component: peripheral plasma membrane protein [goid 0000157] [evidence P] [pmid 2674130]; go_function: GTPase activity [goid 0003924] [evidence P] [pmid 2674130]; go_function: Rho small monomeric GTPase activity [goid 0003931] [evidence IEA]; go_function: GTP binding [goid 0005525] [evidence IEA]; go_process: response to wounding [goid 0009611] [evidence P]; go_process: embryogenesis and morph…	2535	534.6	558.9	2178.2	2263.7	1488.5	2244.5	2519.6	1912.1	2060.6	2364.4	2007.4	709.3	713.2	8681.1	403.6	385.1	3839.5	4578.3	854.8
312	GI_42661147-S	XM_371054.2	LOC388382	Homo sapiens LOC388382 (LOC388382), mRNA.		1871.1	599.2	667.2	1307.7	1913.1	776	1339.9	2959.2	1915.8	2712	2652.9	2259.4	641.9	636	8497.1	340.9	351.2	5404.8	4962.5	851.8
313	GI_13376075-S	NM_024748.1	FLJ11539	Homo sapiens hypothetical protein FLJ11539 (FLJ11539), mRNA.		1560.2	658.8	767.7	1830.3	1912.2	1791.3	1295.9	1096.8	2263.5	1421.3	1994.6	1477.4	666.8	392.4	8872.4	430	337.7	7192.8	5007.5	1646.9
314	GI_19923288-S	NM_005026.2	PIK3CD	Homo sapiens phosphoinositide-3-kinase, catalytic, delta polypeptide (PIK3CD), mRNA.	go_component: phosphoinositide 3-kinase complex [goid 0005942] [evidence NAS] [pmid 9235916]; go_function: phosphatidylinositol 3-kinase activity [goid 0016303] [evidence NAS] [pmid 9235916]; go_function: transferase activity [goid 0016740] [evidence IEA]; go_function: inositol/phosphatidylinositol kinase activity [goid 0004428] [evidence IEA]; go_function: phosphatidylinositol-4,5-bisphosphate 3…	2155.4	684.7	768.2	1537.1	2528.5	829.5	1854.8	3039.3	1768.3	1930.9	3684.7	1772.6	1084.6	1018.1	6671.4	546.2	517.5	4619.5	4948.6	610.7
315	GI_38524599-S	NM_022103.2	FLJ14011	Homo sapiens hypothetical zinc finger protein FLJ14011 (FLJ14011), mRNA.	go_component: nucleus [goid 0005634] [evidence IEA]	1949.7	257	311.4	1703.8	1824.2	799.4	1117.6	3834.6	1876.1	2768	2041.3	2581.4	264.3	198.7	13412.7	113.4	114.2	3408.8	3305.1	684.1
316	GI_5803051-S	NM_006737.1	KIR3DL2	Homo sapiens killer cell immunoglobulin-like receptor, three domains, long cytoplasmic tail, 2 (KIR3DL2), mRNA.	go_component: integral to plasma membrane [goid 0005887] [evidence TAS] [pmid 7716543]; go_function: MHC-interacting protein [goid 0003822] [evidence TAS] [pmid 7716543]; go_function: receptor activity [goid 0004872] [evidence IEA]; go_process: cellular defense response [goid 0006968] [evidence TAS] [pmid 7716543]	2123.5	310	382.3	1124.6	1918.9	663.1	1305.3	620.7	2422.2	996.5	2713.9	1508.6	447	162.7	15145.6	432.7	290.2	3957.5	4677.9	1081.3
317	GI_4503814-S	NM_000150.1	FUT6	Homo sapiens fucosyltransferase 6 (alpha (1,3) fucosyltransferase) (FUT6), mRNA.	go_component: Golgi apparatus [goid 0005794] [evidence IEA]; go_component: integral to membrane [goid 0016021] [evidence IEA]; go_component: extracellular [goid 0005576] [evidence NR]; go_function: fucosyltransferase activity [goid 0008417] [evidence E] [pmid 8175676]; go_function: transferase activity, transferring glycosyl groups [goid 0016757] [evidence IEA]; go_function: 3-galactosyl-N-acetyl…	1782.4	594.6	786.3	1229	1796.3	756.7	1249.6	2590.1	1870.5	2527.2	2732.5	2028.3	648.8	640.8	8699.3	352.6	335.4	5819.9	4993.4	813.4
318	GI_13376553-S	NM_025030.1	FLJ20972	Homo sapiens hypothetical protein FLJ20972 (FLJ20972), mRNA.		1954.3	312.9	349.9	1441.4	2066.3	678.3	1183	3689	2397	3141.9	2832.2	2409.5	456	328.2	9542.3	202.9	184.8	4287.9	3804.3	904.7
319	GI_4507432-S	NM_003217.1	TEGT	Homo sapiens testis enhanced gene transcript (BAX inhibitor 1) (TEGT), mRNA.	go_component: insoluble fraction [goid 0005626] [evidence TAS] [pmid 10087504]; go_component: endoplasmic reticulum [goid 0005783] [evidence TAS] [pmid 10087504]; go_component: integral to plasma membrane [goid 0005887] [evidence TAS] [pmid 10087504]; go_component: nucleus [goid 0005634] [evidence TAS] [pmid 8530040]; go_process: apoptosis [goid 0006915] [evidence IEA]	2281.4	717.1	849.8	1596.5	2347.7	1026	1932.7	2610.6	1585.5	2012.6	3019.2	1691.4	1212.5	1156.4	5919.7	630.6	566	5413	4921.1	571.4
320	GI_31543289-S	NM_004148.2	NINJ1	Homo sapiens ninjurin 1 (NINJ1), mRNA.	go_component: integral to membrane [goid 0016021] [evidence IEA]; go_function: cell adhesion molecule activity [goid 0005194] [evidence IEA]; go_process: cell adhesion [goid 0007155] [evidence TAS] [pmid 9261151]; go_process: neurogenesis [goid 0007399] [evidence TAS] [pmid 9261151]	2263.3	667.1	738.9	2172.7	2490.8	1496.5	2066.9	4137.2	1847.9	2938.9	1935	2718.6	787.4	751.9	6184.1	357.6	332	2109.9	5102.6	546.5
321	GI_34147701-S	NM_144706.2	MGC29762	Homo sapiens hypothetical protein MGC29762 (MGC29762), mRNA.		1779.7	501.2	622.4	1356.4	1817.4	723.1	1324	2450.9	1873.4	2528.4	2412.2	2091	621.6	534.2	9891.6	289.6	281.5	4980.6	4472.3	922.7
322	GI_19913434-S	NM_004047.2	ATP6V0B	Homo sapiens ATPase, H+ transporting, lysosomal 21kDa, V0 subunit c'' (ATP6V0B), mRNA.	go_component: vacuolar hydrogen-transporting ATPase [goid 0000219] [evidence TAS] [pmid 9653649]; go_component: integral to membrane [goid 0016021] [evidence TAS] [pmid 9653649]; go_function: adenosinetriphosphatase activity [goid 0004002] [evidence TAS] [pmid 9653649]; go_function: transporter activity [goid 0005215] [evidence TAS] [pmid 9653649]; go_function: hydrogen ion transporter activity […	2548.7	587.3	676.4	2227.1	2024	1904.8	1820.3	3127.5	1595.4	2126.2	1737.5	1874.5	691.7	615.5	7165.5	295.7	285.1	3488	5978.7	690.1
323	GI_7669491-S	NM_002046.2	GAPD	Homo sapiens glyceraldehyde-3-phosphate dehydrogenase (GAPD), mRNA.	go_component: cytoplasm [goid 0005737] [evidence NAS]; go_function: glyceraldehyde-3-phosphate dehydrogenase (phosphorylating) activity [goid 0004365] [evidence NAS] [pmid 3170585]; go_function: oxidoreductase activity [goid 0016491] [evidence IEA]; go_process: glycolysis [goid 0006096] [evidence NAS]	2198.5	704.7	808	1459.1	2258.8	764.8	1872.9	2961.8	2042.3	2176.5	3471	1696.8	972.1	897.3	5350.2	533.9	516.2	4657.1	5392.1	625.5
324	GI_29826337-S	NM_006332.3	IFI30	Homo sapiens interferon, gamma-inducible protein 30 (IFI30), mRNA.	go_component: lysosome [goid 0005764] [evidence TAS] [pmid 3136170]; go_component: extracellular [goid 0005576] [evidence TAS] [pmid 3136170]; go_function: oxidoreductase activity [goid 0016491] [evidence IEA]; go_process: immune response [goid 0006955] [evidence IEA]	2355.1	708.4	830.3	1465.2	1703.3	868.9	1972.7	1870.7	1707	2432.9	3155.4	1785.2	1843.5	1609.3	6274.9	556	515.2	3844.8	5336.1	516.7
325	GI_10938021-S	NM_006367.2	CAP1	Homo sapiens CAP, adenylate cyclase-associated protein 1 (yeast) (CAP1), mRNA.	go_component: membrane [goid 0016020] [evidence IEA]; go_process: establishment and/or maintenance of cell polarity [goid 0007163] [evidence TAS] [pmid 1406678]; go_process: adenylate cyclase activation [goid 0007190] [evidence TAS] [pmid 7962207]; go_process: signal transduction [goid 0007165] [evidence TAS] [pmid 1406678]	1986.4	897.8	1046.4	1670	2495.2	872.8	1780	3082	1663.1	2032.7	2984.6	1257.8	1874.6	1725.7	4452.4	703.9	678.2	4699.2	4636.5	540.3
326	GI_24797070-S	NM_005516.3	HLA-E	Homo sapiens major histocompatibility complex, class I, E (HLA-E), mRNA.	go_component: integral to membrane [goid 0016021] [evidence IEA]; go_function: class I major histocompatibility complex antigen [goid 0003820] [evidence E] [pmid 3260916]; go_function: MHC class I receptor activity [goid 0030106] [evidence TAS]; go_process: immune response [goid 0006955] [evidence IEA]; go_process: antigen presentation, endogenous antigen [goid 0019883] [evidence IEA]; go_process…	1674.6	1235.1	1324.6	1434.5	2495.4	751.8	1540.3	2480.7	2200.5	1914	2567.5	1752.7	1031.5	936.4	4955.1	608	554.8	6007.9	5020.8	357.4
327	GI_29171679-S	NM_000634.2	IL8RA	Homo sapiens interleukin 8 receptor, alpha (IL8RA), mRNA.	go_component: membrane [goid 0016020] [evidence E]; go_component: integral to membrane [goid 0016021] [evidence IEA]; go_function: interleukin-8 receptor activity [goid 0004918] [evidence TAS] [pmid 10734056]; go_function: chemokine receptor activity [goid 0004950] [evidence TAS] [pmid 1840701]; go_function: G-protein coupled receptor activity [goid 0004930] [evidence E]; go_function: rhodopsin-l…	1971.2	783	848.5	1417.9	2758.4	1085.2	1653	3130.8	1393.7	1642.9	2602.2	2128.8	1499.2	1439	6517.3	699.2	742	2820.5	4968.5	660
328	GI_7705631-S	NM_016068.1	TTC11	Homo sapiens tetratricopeptide repeat domain 11 (TTC11), mRNA.		2082.2	672.7	824.2	1598.8	1074.8	1356.1	1545.1	1793	2765.6	1777.5	2008.2	1715.6	925.5	797.8	8345.9	547.2	543.2	6367.7	2325.9	1583.5
329	GI_42734435-S	NM_024329.4	EFHD2	Homo sapiens EF hand domain containing 2 (EFHD2), mRNA.	go_function: calcium ion binding [goid 0005509] [evidence IEA]	2634.5	664.7	767.7	1775.3	2341.7	1044.1	1957.2	2813.5	1710.7	2521.4	2598.5	1851.2	808.7	816.6	5903.9	330.7	356.5	4078	4899.6	621.4
330	GI_29743632-S	XM_292700.1	LOC342808	Homo sapiens similar to 40S ribosomal protein S2 (LOC342808), mRNA.		1961.4	883.7	1010.4	1815.4	2061.1	1055	1658.1	2548.2	1978.1	2265.2	2241	1772.3	574.4	568.2	7746.1	383.6	335.3	4438.8	4558.9	475.8
331	GI_16507968-S	NM_000967.2	RPL3	Homo sapiens ribosomal protein L3 (RPL3), mRNA.	go_component: cytosolic large ribosomal subunit (sensu Eukarya) [goid 0005842] [evidence TAS] [pmid 2891103]; go_component: nucleolus [goid 0005730] [evidence TAS] [pmid 2891103]; go_component: ribosome [goid 0005840] [evidence IEA]; go_component: intracellular [goid 0005622] [evidence IEA]; go_function: structural protein of ribosome [goid 0003735] [evidence P] [pmid 2891103]; go_function: RNA b…	1608.6	930.4	1121.9	1633.1	2197.4	875.7	1525.5	2150.8	2157.2	2185.3	2553	1263.5	1128.9	1208.4	6073.2	699.8	665.3	6204.8	3580.4	396.2
332	GI_29540530-A	NM_001055.2	SULT1A1	Homo sapiens sulfotransferase family, cytosolic, 1A, phenol-preferring, member 1 (SULT1A1), transcript variant 1, mRNA.	go_function: sulfotransferase activity [goid 0008146] [evidence P] [pmid 8661000]; go_function: aryl sulfotransferase activity [goid 0004062] [evidence IEA]; go_function: transferase activity [goid 0016740] [evidence IEA]; go_process: amine metabolism [goid 0009308] [evidence TAS] [pmid 8661000]; go_process: steroid metabolism [goid 0008202] [evidence IEA]; go_process: catecholamine metabolism [g…	1916.7	452.9	541.1	1558.2	1941	828.6	1468.8	5004.5	2309.6	3094.4	1678.7	2215.2	525.8	454.9	8932.6	109.5	98.7	2369.8	3625.1	805.6
333	GI_37540261-S	XM_034640.4	LOC158345	Homo sapiens similar to ribosomal protein L4; 60S ribosomal protein L4; homologue of Xenopus ribosomal protein L1 (LOC158345), mRNA.		1775.3	515	648.5	1729.1	2721.9	899.6	1512.6	3691.4	2568.5	2570.3	3320.5	1480.2	817.9	383.7	5253.1	516.9	294.8	5118.3	3418.5	524.5
334	GI_42657212-S	XM_379377.1	LOC401219	Homo sapiens hypothetical gene supported by BX649016 (LOC401219), mRNA.		1865.4	546.6	637.2	1196.3	1617	493.3	1126.8	2490.3	1966.5	2590.5	2544.6	2064.2	629.6	571.3	8350.1	331.3	339.7	4893.2	4590	864.2
335	GI_4557786-S	NM_000433.1	NCF2	Homo sapiens neutrophil cytosolic factor 2 (65kDa, chronic granulomatous disease, autosomal 2) (NCF2), mRNA.	go_component: cytosol [goid 0005829] [evidence NR]; go_component: soluble fraction [goid 0005625] [evidence NR]; go_function: electron transporter activity [goid 0005489] [evidence TAS] [pmid 1692159]; go_process: superoxide metabolism [goid 0006801] [evidence NR]; go_process: cellular defense response [goid 0006968] [evidence TAS] [pmid 1692159]	2392.4	544.9	671.3	1843.2	2661.9	1125.4	1908.4	3736.6	2165.4	2433	2985.8	1587.7	1132.2	1112.2	3131.3	481.2	487.2	3884.9	4502.3	785
336	GI_17017972-S	NM_000988.2	RPL27	Homo sapiens ribosomal protein L27 (RPL27), mRNA.	go_component: ribosome [goid 0005840] [evidence TAS] [pmid 8148381]; go_component: intracellular [goid 0005622] [evidence IEA]; go_function: structural constituent of ribosome [goid 0003735] [evidence TAS] [pmid 8148381]; go_process: protein biosynthesis [goid 0006412] [evidence NAS]	1388.7	1102.8	1163.5	2277	1447	2348.5	1253.2	4922.7	1799.8	2574.5	1914.5	1036	838.3	789.9	4182.7	709.5	710.1	5204.9	3253.2	506.7
337	GI_32189393-S	NM_001686.2	ATP5B	Homo sapiens ATP synthase, H+ transporting, mitochondrial F1 complex, beta polypeptide (ATP5B), mRNA.	go_component: proton-transporting ATP synthase, catalytic core (sensu Eukarya) [goid 0005754] [evidence TAS] [pmid 2870059]; go_component: proton-transporting ATP synthase complex (sensu Eukarya) [goid 0005753] [evidence TAS] [pmid 2687158]; go_component: hydrogen-translocating F-type ATPase complex [goid 0045255] [evidence IEA]; go_component: mitochondrion [goid 0005739] [evidence NR]; go_functi…	1943.5	748.1	833.4	1556.6	1921.5	943.6	1909.3	2726.4	1577	1898.9	2431.3	1512.4	1163.2	1048	5012.7	527.4	504.3	5651.8	3921.6	1220.2
338	GI_4507356-S	NM_003564.1	TAGLN2	Homo sapiens transgelin 2 (TAGLN2), mRNA.	go_process: muscle development [goid 0007517] [evidence IEA]	1889.7	1033.9	1169.1	842.8	1823.6	810	1544.6	1459.1	1414.1	1464.5	3549	1423	1325.9	1284	4841	805	657.1	4872.2	6022.8	676.9
339	GI_14251208-S	NM_001288.3	CLIC1	Homo sapiens chloride intracellular channel 1 (CLIC1), mRNA.	go_component: nuclear membrane [goid 0005635] [evidence TAS] [pmid 9139710]; go_component: membrane [goid 0016020] [evidence IEA]; go_component: membrane fraction [goid 0005624] [evidence NR]; go_function: chloride channel activity [goid 0005254] [evidence P] [pmid 9139710]; go_function: voltage-gated chloride channel activity [goid 0005247] [evidence IEA]; go_process: small molecule transport [g…	2087.3	646.3	702.8	1746.5	2239.5	1301.5	1702.3	4271.5	2074.3	2912.2	2619.4	1626.5	979.7	896.1	4333.2	374.1	348	3443	3767.2	658.1
340	GI_37543009-S	XM_352084.1	LOC376138	Homo sapiens similar to 60S ribosomal protein L10 (QM protein) (Tumor suppressor QM) (Laminin receptor homolog) (LOC376138), mRNA.		2627.1	49.3	58.7	2134.2	2596.1	1318	2001.3	4444.8	324.1	530.9	3059.5	2942.2	405.2	303.1	10596	37.8	35.8	1899.5	2754.2	392.8
341	GI_21735623-A	NM_003406.2	YWHAZ	Homo sapiens tyrosine 3-monooxygenase/tryptophan 5-monooxygenase activation protein, zeta polypeptide (YWHAZ), transcript variant 1, mRNA.	go_function: protein binding [goid 0005515] [evidence E]; go_function: protein domain specific binding [goid 0019904] [evidence IEA]	1777.3	790	905.3	1697.7	2084.1	991.8	1465.9	3921.7	1378.8	2309.7	2344.8	1623.4	1133.6	812.7	4407.2	496.9	338	4613.2	4537.9	605.8
342	GI_17017985-S	NM_001861.2	COX4I1	Homo sapiens cytochrome c oxidase subunit IV isoform 1 (COX4I1), mRNA.	go_component: mitochondrion [goid 0005739] [evidence IEA]; go_component: inner membrane [goid 0019866] [evidence IEA]; go_function: cytochrome-c oxidase activity [goid 0004129] [evidence TAS] [pmid 2157630]; go_function: aa3-type cytochrome c oxidase [goid 0009481] [evidence IEA]; go_function: oxidoreductase activity [goid 0016491] [evidence IEA]; go_function: ba3-type cytochrome c oxidase [goid …	2149.6	635	696.4	1580.2	2006.7	1128	1829.4	2106.9	1935.5	2357	2408.9	1595.2	891.8	803.5	7233.6	433.1	446.6	3847	3538.5	481.7
343	GI_31377625-S	NM_080876.2	DUSP19	Homo sapiens dual specificity phosphatase 19 (DUSP19), mRNA.	go_function: protein tyrosine/serine/threonine phosphatase activity [goid 0008138] [evidence IEA]; go_function: prenylated protein tyrosine phosphatase activity [goid 0004727] [evidence IEA]; go_function: hydrolase activity [goid 0016787] [evidence IEA]; go_function: protein tyrosine phosphatase activity [goid 0004725] [evidence IEA]; go_process: protein amino acid dephosphorylation [goid 0006470…	1501.9	614.4	652.5	1188.7	1881.1	637.2	1136.9	2236.4	1685.1	2236.3	2297.5	1971.6	620	635.4	7516	352.5	362.8	4835.2	4747.7	787.4
344	GI_14277689-S	NM_015864.2	C6orf32	Homo sapiens chromosome 6 open reading frame 32 (C6orf32), mRNA.		2061.1	696.2	850.6	1640.9	2146.6	970.4	1851.6	3236.6	1416.3	1832.7	1975.2	1583.6	1028.1	894.6	5210.5	388.5	392.6	4258	4441.2	633.7
345	GI_20070325-S	NM_023018.2	FLJ13052	Homo sapiens NAD kinase (FLJ13052), mRNA.		2411.4	442.6	513	1980.2	2762.8	970.9	1868.1	4498.8	1584.6	1988.5	2206.8	1875.7	792.9	571.4	4565.6	276.7	228.3	3136.6	4118.8	642.6
346	GI_32895366-I	NM_021250.2	LIR9	Homo sapiens leukocyte Ig-like receptor 9 (LIR9), transcript variant 1, mRNA.		1458.1	848.5	913.4	1534.2	1860.7	895.3	1294.9	2399.4	1488.8	1387	1895	1320.5	1352.5	1305.5	4701	230.1	215.7	5290.5	6622.3	409.4
347	GI_22062495-S	XM_170658.1	DKFZp762C186	Homo sapiens tangerin (DKFZp762C186), mRNA.		2886.5	519.1	668.7	2046.5	2372.8	927.4	2276.9	2523	1546.5	2113.1	1558.5	1947.8	863.2	871.9	5338.4	372	352.6	3227.8	4311	629.3
348	GI_14456712-S	NM_005331.3	HBQ1	Homo sapiens hemoglobin, theta 1 (HBQ1), mRNA.	go_component: hemoglobin complex [goid 0005833] [evidence TAS] [pmid 7555018]; go_function: globin [goid 0001524] [evidence IEA]; go_function: oxygen transporter activity [goid 0005344] [evidence IEA]; go_process: oxygen transport [goid 0015671] [evidence TAS] [pmid 7555018]; go_process: transport [goid 0006810] [evidence IEA]	2352.2	613.5	684.5	2432.9	1887.8	3078.3	2008.7	751.1	2070.7	1364.1	1524.8	1622.6	732.2	750.3	4119.9	517.6	560.2	4357	4394.7	1467.5
349	GI_27754207-S	NM_173702.1	MTATP6	Homo sapiens ATP synthase 6 (MTATP6), mRNA.	go_component: proton-transporting ATP synthase complex (sensu Eukarya) [goid 0005753] [evidence NR]; go_component: integral to membrane [goid 0016021] [evidence IEA]; go_component: proton-transporting ATP synthase complex, coupling factor F(o) (sensu Eukarya) [goid 0000276] [evidence NAS]; go_component: mitochondrion [goid 0005739] [evidence IEA]; go_function: hydrogen ion transporter activity [g…	2065.6	301	364.2	1137.9	2142.6	572.8	1922.5	3104.3	1309.1	1854.4	4972.3	2074	891.2	740.9	7693.7	635.4	603.6	1911.8	2491.6	457.8
350	GI_28558992-I	NM_175605.2	TG737	Homo sapiens Probe hTg737 (polycystic kidney disease, autosomal recessive) (TG737), transcript variant 1, mRNA.	go_process: excretion [goid 0007588] [evidence TAS] [pmid 7633404]	1770.4	369.2	483.4	1407.5	1890.1	832.2	1515.6	4073	1672.7	2345.4	2242.4	2217.8	553.7	469.5	6368.6	248.6	231.8	4165.1	3680.1	613.9
351	GI_41327157-S	NM_001666.2	ARHGAP4	Homo sapiens Rho GTPase activating protein 4 (ARHGAP4), mRNA.	go_component: peripheral plasma membrane protein [goid 0000157] [evidence E] [pmid 8570618]; go_component: kinesin complex [goid 0005871] [evidence IEA]; go_component: cytoplasm [goid 0005737] [evidence TAS] [pmid 8570618]; go_function: SH3/SH2 adaptor protein activity [goid 0005070] [evidence TAS] [pmid 8570618]; go_function: Rho GTPase activator activity [goid 0005100] [evidence TAS] [pmid 8570…	2198.3	538.2	680.7	2366.6	2359.8	1027.1	1857.4	3280.2	1831.1	2547.6	1801.2	1602.8	701.5	685.4	5581.7	332.3	313.9	3226.2	3624.4	572.9
352	GI_26051226-I	NM_172097.1	CATSPER2	Homo sapiens cation channel, sperm associated 2 (CATSPER2), transcript variant 4, mRNA.		1384.6	545.1	669.1	1129.6	1707.5	597.4	1010.4	2329.5	1724.3	2450.2	2464.8	2020.7	528.5	570.7	7198.7	324.4	300.5	4664.8	4647.5	842
353	GI_21536462-I	NM_022468.3	MMP25	Homo sapiens matrix metalloproteinase 25 (MMP25), transcript variant 1, mRNA.	go_component: membrane [goid 0016020] [evidence NAS] [pmid 11034316]; go_component: extracellular matrix [goid 0005578] [evidence NAS] [pmid 10628838]; go_function: zinc ion binding [goid 0008270] [evidence IEA]; go_function: metalloendopeptidase activity [goid 0004222] [evidence IEA]; go_function: hydrolase activity [goid 0016787] [evidence IEA]; go_process: proteolysis and peptidolysis [goid 00…	2225.3	722.4	813.3	2179.4	2587.3	1479.8	1552.1	4661	1337.8	1892.4	2110	1537.9	659.3	629.1	4901.3	295.2	279.6	2839.8	3674	538.7
354	GI_25777625-A	NM_172028.1	ABTB1	Homo sapiens ankyrin repeat and BTB (POZ) domain containing 1 (ABTB1), transcript variant 3, mRNA.		2257.1	351.1	410.1	1104	2260.2	597.7	1799.1	3396.9	1936.9	1682	2916.2	1619.7	885.9	785.3	5748.2	480.3	485.2	3071.1	4281	684.7
355	GI_14210509-S	NM_032496.1	ARHGAP9	Homo sapiens Rho GTPase activating protein 9 (ARHGAP9), mRNA.		2044.1	489.3	593.8	1684.6	2199.4	629.8	1740.6	3708.4	1754.6	2007.8	2517.2	2056.8	1210.4	1075.1	4575.5	445.1	404.2	3011.7	3991.3	582.1
356	GI_32455261-A	NM_181652.1	PRDX5	Homo sapiens peroxiredoxin 5 (PRDX5), nuclear gene encoding mitochondrial protein, transcript variant 3, mRNA.	go_component: peroxisome [goid 0005777] [evidence TAS] [pmid 10521424]; go_component: mitochondrion [goid 0005739] [evidence TAS] [pmid 10521424]; go_function: electron transporter activity [goid 0005489] [evidence TAS] [pmid 10521424]; go_function: antioxidant activity [goid 0016209] [evidence IEA]; go_process: respiratory gaseous exchange [goid 0007585] [evidence TAS] [pmid 10424490]; go_proces…	1570.7	1245.6	1487.4	1502.7	1878	1065.1	1294.3	2286.3	2665.4	1461.6	1889.4	1056.3	1228	1158.6	6122.4	500.6	460.7	3817.2	3164.1	832
357	GI_34147489-S	NM_004549.3	NDUFC2	Homo sapiens NADH dehydrogenase (ubiquinone) 1, subcomplex unknown, 2, 14.5kDa (NDUFC2), mRNA.	go_component: NADH dehydrogenase complex (ubiquinone) (sensu Eukarya) [goid 0005748] [evidence NR]; go_component: membrane fraction [goid 0005624] [evidence NR]; go_function: NADH dehydrogenase (ubiquinone) activity [goid 0008137] [evidence NR]	1346.3	261.5	308.3	1266	1383.5	593.9	1105	3277.5	1122.6	2100.3	1544.6	1792.7	229.5	200.2	12267.3	102	103.3	3655.2	3396.2	534.3
358	GI_9845486-A	NM_017490.1	MARK2	Homo sapiens MAP/microtubule affinity-regulating kinase 2 (MARK2), transcript variant 1, mRNA.	go_component: microtubule cytoskeleton [goid 0015630] [evidence NR]; go_function: protein serine/threonine kinase activity [goid 0004674] [evidence P] [pmid 9730619]; go_process: protein amino acid phosphorylation [goid 0006468] [evidence P] [pmid 9730619]	2870.1	382.4	456.2	1579	2621.8	668.4	2343.8	3248.2	1401.4	2075.5	2213.1	1969.7	821.6	706.4	5715.1	334.2	348.8	3101.5	3123.3	608.7
359	GI_13259551-A	NM_002038.2	G1P3	Homo sapiens interferon, alpha-inducible protein (clone IFI-6-16) (G1P3), transcript variant 1, mRNA.	go_component: integral to membrane [goid 0016021] [evidence IEA]; go_process: immune response [goid 0006955] [evidence TAS] [pmid 3017706]	1112.6	383.6	456	1714.1	3588.6	871.6	998.2	2442.8	1174.2	2102.1	2379.8	2702.3	870.2	626.5	4535.7	564.4	506.9	1972	7104.9	372.7
360	GI_37542995-S	XM_292012.3	LOC341315	Homo sapiens similar to Polyadenylate-binding protein 1 (Poly(A)-binding protein 1) (PABP 1) (LOC341315), mRNA.		1922.2	430	468.1	838.3	1933.2	575.2	1236.8	2970.2	2396.1	2477.2	1867.5	2492.7	427.6	217.7	7757.1	213.4	145.6	3860.2	3287.2	890.2
361	GI_4507508-S	NM_003254.1	TIMP1	Homo sapiens tissue inhibitor of metalloproteinase 1 (erythroid potentiating activity, collagenase inhibitor) (TIMP1), mRNA.	go_component: extracellular matrix [goid 0005578] [evidence IEA]; go_function: metalloendopeptidase inhibitor activity [goid 0008191] [evidence TAS] [pmid 7507419]; go_function: metallopeptidase activity [goid 0008237] [evidence NAS] [pmid 1653055]; go_process: positive regulation of cell proliferation [goid 0008284] [evidence TAS] [pmid 3839290]; go_process: development [goid 0007275] [evidence …	2166.7	428.4	490.4	1246.1	2261	731.1	2068.4	1868.9	1506	2051.7	2365.6	2023.5	793.2	691.3	7296.7	307.7	292.8	2427	4737.2	546.1
362	GI_38348383-S	NM_198549.1	FLJ35093	Homo sapiens FLJ35093 protein (FLJ35093), mRNA.		1454.5	340.7	409.6	1195.4	1570.3	527.2	1061.5	3267.5	1353	2217.1	1782.9	1592.5	285.5	179.2	11851.4	127.4	112.1	3275.5	2999.8	673.1
363	GI_15431289-S	NM_000975.2	RPL11	Homo sapiens ribosomal protein L11 (RPL11), mRNA.	go_component: cytosolic large ribosomal subunit (sensu Eukarya) [goid 0005842] [evidence TAS] [pmid 7748210]; go_component: ribosome [goid 0005840] [evidence IEA]; go_component: intracellular [goid 0005622] [evidence IEA]; go_function: structural protein of ribosome [goid 0003735] [evidence P] [pmid 7748210]; go_function: RNA binding [goid 0003723] [evidence P] [pmid 7748210]; go_function: struct…	1447.7	799	1024.7	1879.4	2867.7	1176.7	1249.2	3311	2766.9	2144.8	2378.1	770	606.6	539.6	4617.3	313.6	296.4	4829.4	2557.5	662
364	GI_23110923-S	NM_002801.2	PSMB10	Homo sapiens proteasome (prosome, macropain) subunit, beta type, 10 (PSMB10), mRNA.	go_component: 26S proteasome [goid 0005837] [evidence TAS] [pmid 9551082]; go_component: proteasome core complex (sensu Eukarya) [goid 0005839] [evidence IEA]; go_component: cytosol [goid 0005829] [evidence IEA]; go_function: peptidase activity [goid 0008233] [evidence IEA]; go_function: proteasome endopeptidase activity [goid 0004299] [evidence IEA]; go_function: endopeptidase activity [goid 000…	1592.3	930.8	1103.4	2327.1	1784.5	1767.9	1480.1	2348.3	1372.2	2003.2	1648.3	1247.4	969.7	1047.6	6658.3	501.1	456.4	3326.7	3185.5	447.4
365	GI_23110931-A	NM_148954.1	PSMB9	Homo sapiens proteasome (prosome, macropain) subunit, beta type, 9 (large multifunctional protease 2) (PSMB9), transcript variant 2, mRNA.	go_component: 26S proteasome [goid 0005837] [evidence TAS] [pmid 8666937]; go_component: proteasome core complex (sensu Eukarya) [goid 0005839] [evidence IEA]; go_component: cytosol [goid 0005829] [evidence IEA]; go_function: peptidase activity [goid 0008233] [evidence IEA]; go_function: proteasome endopeptidase activity [goid 0004299] [evidence IEA]; go_function: endopeptidase activity [goid 000…	1657	751.9	813.3	2053.6	2367.5	1410.2	1582	2235.2	1687.8	2459.1	1641.5	1986.2	1208	1057.2	5834.1	392.1	384.4	2578.5	3580.6	455.4
366	GI_6552341-S	NM_003145.2	SSR2	Homo sapiens signal sequence receptor, beta (translocon-associated protein beta) (SSR2), mRNA.	go_component: integral to membrane [goid 0016021] [evidence TAS] [pmid 7789174]; go_component: endoplasmic reticulum [goid 0005783] [evidence TAS] [pmid 7789174]; go_function: signal sequence binding [goid 0005048] [evidence TAS] [pmid 7789174]; go_process: cotranslational membrane targeting [goid 0006613] [evidence TAS] [pmid 7789174]	1895	562.9	619.2	1820.4	1927.6	1036.2	1551.5	3424.9	1959	2519.8	2780.4	1798.8	699.3	656.8	3653.2	357.1	365.4	3881.3	4033.3	547
367	GI_31543151-S	NM_032338.2	MGC14817	Homo sapiens hypothetical protein MGC14817 (MGC14817), mRNA.		1786.9	299.4	366.3	1741.1	1696.3	1003.2	1368.4	3211.8	1359.3	2190.1	1747.3	2020	275	245.5	8530.7	140.3	129.4	3555	3564.2	778.4
368	GI_37543806-S	XM_352070.1	LOC376101	Homo sapiens similar to Peptidylprolyl isomerase A (cyclophilin A) (LOC376101), mRNA.		1663.7	912.8	1028.9	1530.8	1936.5	1088.5	1454.2	2650	2026.6	2421.6	2313.2	1273.1	1163.1	941.3	4591.7	606.6	554.1	4710	2465.3	654.3
369	GI_6912301-S	NM_012075.1	C16orf35	Homo sapiens chromosome 16 open reading frame 35 (C16orf35), mRNA.	go_component: cellular_component unknown [goid 0008372] [evidence ND]; go_function: molecular_function unknown [goid 0005554] [evidence ND]; go_process: biological_process unknown [goid 0000004] [evidence ND]	1834.3	1143	1288.3	1709.2	1467.5	1891.7	1672.6	823.2	1308.8	997.3	1373.6	858	1201.1	1035	6348.1	769.1	740.2	3586	4464.5	1432.8
370	GI_4504166-S	NM_002094.1	GSPT1	Homo sapiens G1 to S phase transition 1 (GSPT1), mRNA.	go_component: nucleus [goid 0005634] [evidence IEA]; go_function: GTPase activity [goid 0003924] [evidence TAS] [pmid 2511002]; go_function: translation elongation factor activity [goid 0003746] [evidence IEA]; go_function: GTP binding [goid 0005525] [evidence IEA]; go_function: DNA binding [goid 0003677] [evidence IEA]; go_function: protein-synthesizing GTPase activity [goid 0008547] [evidence I…	1469.2	1186.7	1368.3	1467	1207.8	673.1	1155.5	1035.9	1050.5	1091.6	1348.2	845.1	1637.4	1403	4152.6	1262.8	1140	6794.4	3838.5	1812.6
371	GI_4502472-S	NM_001731.1	BTG1	Homo sapiens B-cell translocation gene 1, anti-proliferative (BTG1), mRNA.	go_function: cell cycle regulator [goid 0003750] [evidence E] [pmid 1373383]; go_process: negative regulation of cell proliferation [goid 0008285] [evidence TAS] [pmid 1373383]; go_process: cell proliferation [goid 0008283] [evidence TAS] [pmid 2069907]	1737.6	753.2	817.1	1349.6	1709.9	813.7	1575.2	3273.3	1582.7	2148.4	2893.6	1420.2	904	847.5	3500.3	460.1	458.3	4613.8	4562.1	476.6
372	GI_15812179-S	NM_004926.2	ZFP36L1	Homo sapiens zinc finger protein 36, C3H type-like 1 (ZFP36L1), mRNA.	go_component: nucleus [goid 0005634] [evidence NR]; go_function: transcription factor activity [goid 0003700] [evidence NR] [pmid 8595910]	2013	893.7	972.4	1259.3	2046.9	934.8	1635.4	3794.8	1272.6	1605	2002.6	1194.9	1152.1	980.4	3557	365.2	341.6	3858.4	5297.2	534.1
373	GI_5453709-S	NM_006148.1	LASP1	Homo sapiens LIM and SH3 protein 1 (LASP1), mRNA.	go_function: SH3/SH2 adaptor protein activity [goid 0005070] [evidence P] [pmid 7589475]	1743.2	825.5	952.1	1832.4	1999.9	878.5	1548.2	2893.5	1338.3	1856.2	2195.9	1430.8	988.8	1043	3760.9	431.2	410.9	4439.8	4476.1	548.4
374	GI_6806897-A	NM_007308.1	SNCA	Homo sapiens synuclein, alpha (non A4 component of amyloid precursor) (SNCA), transcript variant NACP112, mRNA.	go_component: cytoplasm [goid 0005737] [evidence TAS] [pmid 8248242]; go_function: structural molecule activity [goid 0005198] [evidence IEA]; go_process: anti-apoptosis [goid 0006916] [evidence TAS] [pmid 10818098]; go_process: pathogenesis [goid 0009405] [evidence TAS] [pmid 10092675]; go_process: central nervous system development [goid 0007417] [evidence TAS] [pmid 9197268]	1213.2	1164.2	1437.4	1055.9	1245.3	939.8	1134.4	608.2	807.7	698.5	949.7	551.4	1739.7	1589.5	2171.3	995.5	1005.4	12034.4	2568.9	1639.1
375	GI_4502670-S	NM_000733.1	CD3E	Homo sapiens CD3E antigen, epsilon polypeptide (TiT3 complex) (CD3E), mRNA.	go_component: integral to plasma membrane [goid 0005887] [evidence NAS] [pmid 3478717]; go_component: plasma membrane [goid 0005886] [evidence P] [pmid 3012357]; go_component: T-cell receptor complex [goid 0042101] [evidence NAS]; go_function: T-cell receptor activity [goid 0004894] [evidence TAS] [pmid 8490660]; go_function: receptor signaling protein activity [goid 0005057] [evidence TAS] [pmid…	1499.8	372	408.6	876.5	1855.2	388.7	1239.3	1699.9	1616.5	2264.9	4483.1	1959.6	959.6	704.6	6604.9	647	550.4	4050	2910.8	380.1
376	GI_21361767-S	NM_002065.3	GLUL	Homo sapiens glutamate-ammonia ligase (glutamine synthase) (GLUL), mRNA.	go_function: glutamate-ammonia ligase activity [goid 0004356] [evidence IEA]; go_function: ligase activity [goid 0016874] [evidence IEA]; go_process: glutamine biosynthesis [goid 0006542] [evidence NR]; go_process: regulation of neurotransmitter levels [goid 0001505] [evidence NR]; go_process: nitrogen fixation [goid 0009399] [evidence IEA]	1622.8	1084.5	1242.1	1402.8	1929.2	1077.9	1180.2	3618.4	1022.2	1385.8	1634.7	1075.6	1259.3	1163.7	2747.8	505	519.5	4874.5	4656.5	1256.4
377	GI_4758515-S	NM_004494.1	HDGF	Homo sapiens hepatoma-derived growth factor (high-mobility group protein 1-like) (HDGF), mRNA.	go_component: extracellular space [goid 0005615] [evidence TAS] [pmid 7929202]; go_component: cytoplasm [goid 0005737] [evidence TAS] [pmid 7929202]; go_component: nucleus [goid 0005634] [evidence IEA]; go_function: heparin binding [goid 0008201] [evidence TAS] [pmid 7929202]; go_function: growth factor activity [goid 0008083] [evidence IEA]; go_function: DNA binding [goid 0003677] [evidence IEA]…	1575.9	721.2	781.1	736.1	1808.4	610.3	1622.4	1236.3	1168.2	1431.8	1894.3	1067.9	1375.5	1221.1	5184.8	610.8	513	6127.2	3819.6	1741.2
378	GI_27881480-S	NM_002872.3	RAC2	Homo sapiens ras-related C3 botulinum toxin substrate 2 (rho family, small GTP binding protein Rac2) (RAC2), mRNA.	go_component: peripheral plasma membrane protein [goid 0000157] [evidence P] [pmid 2674130]; go_function: GTPase activity [goid 0003924] [evidence P] [pmid 2674130]; go_function: Rho small monomeric GTPase activity [goid 0003931] [evidence IEA]; go_function: GTP binding [goid 0005525] [evidence IEA]; go_process: signal transduction [goid 0007165] [evidence TAS] [pmid 2674130]; go_process: small G…	1527.5	504.7	615.9	1066.7	1884.3	618.5	1354.6	1979.9	1498.9	1606.4	3546.4	1235.9	1241	1173.4	4571	675.7	616.7	4611.6	4288	503.9
379	GI_17865815-A	NM_078488.1	VNN2	Homo sapiens vanin 2 (VNN2), transcript variant 2, mRNA.	go_function: hydrolase activity, acting on carbon-nitrogen (but not peptide) bonds [goid 0016810] [evidence IEA]; go_process: cell motility [goid 0006928] [evidence TAS] [pmid 9790769]; go_process: nitrogen metabolism [goid 0006807] [evidence IEA]	1965.4	721.8	841.7	1494.3	1982.5	696.4	1780.1	4901.5	1173.5	1416.6	2143.3	706.7	859.1	920.5	3101.4	314.2	322.3	4327.7	4609.2	590.1
380	GI_9845488-A	NM_004954.2	MARK2	Homo sapiens MAP/microtubule affinity-regulating kinase 2 (MARK2), transcript variant 2, mRNA.	go_component: microtubule cytoskeleton [goid 0015630] [evidence NR]; go_function: protein serine/threonine kinase activity [goid 0004674] [evidence P] [pmid 9730619]; go_process: protein amino acid phosphorylation [goid 0006468] [evidence P] [pmid 9730619]	2539.3	278.8	336.6	1455.8	2517.4	620.1	1994.9	3695.6	1419	2338.4	2560.5	2141.4	559.1	493.4	5493.2	231.5	243.3	2544.9	2695.4	639.6
381	GI_23110945-A	NM_002792.2	PSMA7	Homo sapiens proteasome (prosome, macropain) subunit, alpha type, 7 (PSMA7), transcript variant 1, mRNA.	go_component: 26S proteasome [goid 0005837] [evidence TAS] [pmid 8811196]; go_component: proteasome core complex (sensu Eukarya) [goid 0005839] [evidence IEA]; go_component: cytosol [goid 0005829] [evidence IEA]; go_function: transcription activating factor [goid 0003710] [evidence E] [pmid 8764072]; go_function: peptidase activity [goid 0008233] [evidence IEA]; go_function: proteasome endopeptid…	1682.7	644.5	763.3	1430	1929.6	876	1425.5	3082.9	1726.8	2644.7	2199.9	1494.4	758.1	680.9	5051.2	311.2	290.1	3797.4	3355.7	650.6
382	GI_34147444-S	NM_032898.2	MGC14126	Homo sapiens hypothetical protein MGC14126 (MGC14126), mRNA.		1493.5	484.6	552.2	1060.9	1599.9	488.6	991.7	2175.1	1753.5	2149.7	2068.8	1746.1	613.4	642.1	5948	299.4	284.3	5194.1	4387.1	742.1
383	GI_5031748-S	NM_005517.1	HMGN2	Homo sapiens high-mobility group nucleosomal binding domain 2 (HMGN2), mRNA.		1747.1	560.9	676	1280.8	1986.1	934.9	1567.4	3711.5	1673.8	1904.4	2968.8	1230.5	833.8	518.6	3870.3	415.8	405.2	4090.3	3833.5	430.2
384	GI_28872797-S	NM_005195.2	CEBPD	Homo sapiens CCAAT/enhancer binding protein (C/EBP), delta (CEBPD), mRNA.	go_component: nucleus [goid 0005634] [evidence IEA]; go_function: DNA binding [goid 0003677] [evidence IEA]; go_function: translation regulator activity [goid 0045182] [evidence IEA]; go_process: transcription from Pol II promoter [goid 0006366] [evidence TAS] [pmid 8314590]; go_process: regulation of transcription, DNA-dependent [goid 0006355] [evidence IEA]	2231.1	459.9	570.5	1248.2	1351.2	489.6	1813	2730.3	1811.3	2943.9	2963.5	1917.6	610.1	612.4	4313.6	246.7	285	2681	4741.3	563.5
385	GI_45238848-S	NM_030979.2	PABPC3	Homo sapiens poly(A) binding protein, cytoplasmic 3 (PABPC3), mRNA.	go_component: cytoplasm [goid 0005737] [evidence NAS] [pmid 11328870]; go_function: poly(A) binding [goid 0008143] [evidence IDA] [pmid 11328870]; go_function: RNA binding [goid 0003723] [evidence IEA]; go_process: mRNA metabolism [goid 0016071] [evidence NAS] [pmid 11328870]	2143.9	472.4	635.2	950.5	2076.4	678.1	1521.3	2448.2	1954	2282.9	2270.3	1932.6	485.7	401.5	5401.4	276.2	266.9	4298.5	3311.8	758.3
386	GI_21361197-S	NM_000295.2	SERPINA1	Homo sapiens serine (or cysteine) proteinase inhibitor, clade A (alpha-1 antiproteinase, antitrypsin), member 1 (SERPINA1), mRNA.	go_function: endopeptidase inhibitor activity [goid 0004866] [evidence NR]; go_function: plasma glycoprotein [goid 0005211] [evidence NR]; go_function: serpin [goid 0004868] [evidence IEA]; go_function: serine protease inhibitor activity [goid 0004867] [evidence IEA]; go_process: acute-phase response [goid 0006953] [evidence IEA]	1847.9	579.7	682.8	1050.9	2325.6	583.4	1444.2	2001.8	1610.8	1866.1	2744.9	1264.7	730.8	689.2	5696.8	391.8	411.7	3371.9	4766.3	500.7
387	GI_5803059-S	NM_006864.1	LILRB3	Homo sapiens leukocyte immunoglobulin-like receptor, subfamily B (with TM and ITIM domains), member 3 (LILRB3), mRNA.	go_component: integral to plasma membrane [goid 0005887] [evidence TAS] [pmid 9278324]; go_component: integral to membrane [goid 0016021] [evidence IEA]; go_function: defense/immunity protein activity [goid 0003793] [evidence TAS] [pmid 9278324]; go_function: transmembrane receptor activity [goid 0004888] [evidence TAS] [pmid 9278324]; go_function: receptor activity [goid 0004872] [evidence IEA] …	2031.3	636.4	701.4	1169.8	2654.7	587.5	1860.3	3878.1	1436	1626.3	1529.5	2043.4	667.9	663.2	5128.6	267.4	268.3	2903.4	3962.1	531.9
388	GI_12025669-S	NM_001102.2	ACTN1	Homo sapiens actinin, alpha 1 (ACTN1), mRNA.	go_component: actin cytoskeleton [goid 0015629] [evidence TAS] [pmid 2349951]; go_function: structural constituent of cytoskeleton [goid 0005200] [evidence TAS] [pmid 2349951]; go_function: actin binding [goid 0003779] [evidence IEA]; go_function: calcium ion binding [goid 0005509] [evidence IEA]	2225.4	406.2	429.3	1264.5	2743.1	748.8	1847.4	3170.2	1770.6	1656.4	2396	1795.4	639.1	530	5493.7	250.1	228.2	2633.2	3518.2	631.5
389	GI_23312365-S	NM_001066.2	TNFRSF1B	Homo sapiens tumor necrosis factor receptor superfamily, member 1B (TNFRSF1B), mRNA.	go_component: integral to membrane [goid 0016021] [evidence IEA]; go_function: tumor necrosis factor receptor activity [goid 0005031] [evidence TAS] [pmid 8702885]; go_function: receptor activity [goid 0004872] [evidence IEA]; go_process: apoptosis [goid 0006915] [evidence IEA]	2188.6	459	536.1	2125.7	2330	1078.4	1684.9	3366	1570.6	2237.5	1555.6	1873.5	708	644.9	5054.3	286	294.4	2676.3	2924.5	767.4
390	GI_34335151-S	NM_001020.3	RPS16	Homo sapiens ribosomal protein S16 (RPS16), mRNA.	go_component: cytosolic small ribosomal subunit (sensu Eukarya) [goid 0005843] [evidence TAS] [pmid 2016298]; go_component: ribosome [goid 0005840] [evidence IEA]; go_component: intracellular [goid 0005622] [evidence IEA]; go_function: structural protein of ribosome [goid 0003735] [evidence P] [pmid 2016298]; go_function: RNA binding [goid 0003723] [evidence TAS] [pmid 2016298]; go_function: stru…	1962.1	592.3	726.1	1942.8	1606.8	1617.4	1542.4	2889.4	2107.9	2102.6	2088.2	1998.3	437.1	429.5	4305.1	241.8	230.8	4127	2869	409.8
391	GI_17444700-S	XM_060535.1	LOC127545	Homo sapiens similar to ribosomal protein L18a; 60S ribosomal protein L18a (LOC127545), mRNA.		1471.9	347.1	402.7	1740.9	1584.8	1298.1	1036.8	2721.3	1868.7	2193	1629.2	1942.3	320	120.8	7495.4	224.5	156.9	3401.5	3614.2	431.2
392	GI_6005889-S	NM_007108.1	TCEB2	Homo sapiens transcription elongation factor B (SIII), polypeptide 2 (18kDa, elongin B) (TCEB2), mRNA.	go_component: nucleus [goid 0005634] [evidence IEA]; go_function: protein binding [goid 0005515] [evidence TAS] [pmid 7660130]; go_function: translation elongation factor activity [goid 0003746] [evidence IEA]; go_process: RNA elongation from Pol II promoter [goid 0006368] [evidence TAS] [pmid 7660129]; go_process: protein complex assembly [goid 0006461] [evidence TAS] [pmid 7660129]; go_process:…	1627.8	552.3	606.8	1553.7	1706.2	1336	1324.3	2005	2579.2	1979.2	1852.9	1072.8	680.7	601.4	4200.9	308.3	279.8	4885	3110.8	1310.9
393	GI_32261315-S	NM_024733.2	FLJ14345	Homo sapiens hypothetical protein FLJ14345 (FLJ14345), mRNA.	go_component: nucleus [goid 0005634] [evidence IEA]	1407.5	456	548.9	1095.3	1511.5	586.4	1030.7	2128	1438.7	2061.9	2028.1	1741.7	448.5	416.7	7592.4	236.1	231.8	4323	3627.9	657.7
394	GI_21237756-S	NM_000560.2	CD53	Homo sapiens CD53 antigen (CD53), mRNA.	go_component: integral to plasma membrane [goid 0005887] [evidence NR]; go_component: plasma membrane [goid 0005886] [evidence P]; go_process: signal transduction [goid 0007165] [evidence NR] [pmid 8404042]; go_process: antimicrobial humoral response (sensu Invertebrata) [goid 0006960] [evidence NR]; go_process: antimicrobial humoral response (sensu Vertebrata) [goid 0019735] [evidence NR]	2006.9	595.8	752	1472	1798.6	883.5	1772.2	3252.1	1110.4	1530.7	2238.7	1574.8	972.7	1019.6	2551.1	473.5	462.4	3928.6	4738.3	419.7
395	GI_7705876-S	NM_016185.1	HN1	Homo sapiens hematological and neurological expressed 1 (HN1), mRNA.		1645.4	497	577.8	1226.6	2095.2	1374.9	1453.8	1813.1	1137.5	1391.7	1789.7	1492.6	1037.7	829.8	5838.3	366.9	334.6	3319.1	4356.2	628.3
396	GI_37541187-S	XM_350967.1	LOC374596	Homo sapiens similar to 40S ribosomal protein S8 (LOC374596), mRNA.		1416.9	577.5	691.7	1872.4	1266.3	1310.9	872.9	3035.2	1749.1	2079.1	1236.6	1517.1	400.5	229.7	7365.6	227.8	201.6	3817.8	2918	377.8
397	GI_37546026-S	XM_350946.1	LOC374572	Homo sapiens similar to hypothetical protein (LOC374572), mRNA.		2137.6	405	477.3	410.1	2708.1	279.9	1735.9	8386.7	590	1172.7	1654.1	765.1	258.8	204.8	2918.2	436.7	436.7	3040.3	4863.4	264.1
398	GI_15812218-S	NM_000989.2	RPL30	Homo sapiens ribosomal protein L30 (RPL30), mRNA.	go_component: cytosolic large ribosomal subunit (sensu Eukarya) [goid 0005842] [evidence TAS] [pmid 1577483]; go_component: ribosome [goid 0005840] [evidence IEA]; go_component: intracellular [goid 0005622] [evidence IEA]; go_function: structural protein of ribosome [goid 0003735] [evidence P] [pmid 1577483]; go_function: RNA binding [goid 0003723] [evidence TAS] [pmid 1577483]; go_function: stru…	1285.3	1071.5	1336.2	1518	1711.6	1192.7	1221.4	2900.3	2028.8	1831.2	2299.7	981.9	927.1	860.6	3018.9	463.3	435.3	4764.8	2607.6	670.9
399	GI_42658769-S	XM_376761.1	LOC401457	Homo sapiens hypothetical gene supported by BC062364; BX647289 (LOC401457), mRNA.		1089.1	1351.6	1666	910.9	1246.2	817.8	937.8	1329.9	750.5	790.6	1661.3	612.1	1559.8	1387.6	3770.8	730.7	688.9	5871.1	3793.6	2157.3
400	GI_26665892-S	NM_002125.3	HLA-DRB5	Homo sapiens major histocompatibility complex, class II, DR beta 5 (HLA-DRB5), mRNA.	go_component: integral to plasma membrane [goid 0005887] [evidence P] [pmid 3456344]; go_function: class II major histocompatibility complex antigen [goid 0003821] [evidence P] [pmid 3456344]; go_process: perception of pest/pathogen/parasite [goid 0009596] [evidence P] [pmid 3456344]	3372.7	544	648.5	1411.7	334.4	1838.9	2656.8	3828.7	3669.9	2969.6	2169	1804.9	27.4	24.1	5987.1	503.3	485.5	232.9	204.9	405.6
401	GI_23238212-S	NM_005717.2	ARPC5	Homo sapiens actin related protein 2/3 complex, subunit 5, 16kDa (ARPC5), mRNA.	go_component: Arp2/3 protein complex [goid 0005885] [evidence TAS] [pmid 9230079]; go_component: actin cytoskeleton [goid 0015629] [evidence P] [pmid 9230079]; go_component: cytoplasm [goid 0005737] [evidence TAS] [pmid 9359840]; go_function: structural constituent of cytoskeleton [goid 0005200] [evidence TAS] [pmid 9230079]; go_process: actin cytoskeleton reorganization [goid 0007012] [evidence …	1767.6	786.4	856.2	1519.5	1620.3	1088.4	1560.9	3980.3	1386.1	1767.1	1964.6	1288.9	1089.1	685.2	2389.6	386.8	267.1	3860.4	4357.1	496
402	GI_22035621-A	NM_145183.1	ASC	Homo sapiens apoptosis-associated speck-like protein containing a CARD (ASC), transcript variant 3, mRNA.	go_component: intracellular [goid 0005622] [evidence IEA]; go_function: apoptosis regulator activity [goid 0016329] [evidence IEA]; go_process: induction of apoptosis [goid 0006917] [evidence TAS] [pmid 10567338]; go_process: cell growth and/or maintenance [goid 0008151] [evidence IEA]; go_process: negative regulation of cell cycle [goid 0045786] [evidence IEA]; go_process: apoptosis [goid 000691…	1944.8	635.8	784	2189.2	1567.6	1640.6	1565.6	2514.4	1175.6	1806.7	1318.1	1498	421.7	494.5	7062.2	188.9	179.2	2203.6	3083.5	466.8
403	GI_22095361-S	NM_022343.2	C9orf19	Homo sapiens chromosome 9 open reading frame 19 (C9orf19), mRNA.		1353	716.3	810.4	1397.9	1545.2	946	1232.5	2222.3	1112.1	1547.9	1590.5	1048.6	1080.5	1034.5	4518.1	404	380.3	3945.5	5395.6	408.5
404	GI_14141164-S	NM_006196.2	PCBP1	Homo sapiens poly(rC) binding protein 1 (PCBP1), mRNA.	go_component: cytoplasm [goid 0005737] [evidence NAS]; go_component: nucleus [goid 0005634] [evidence NAS]; go_component: ribonucleoprotein complex [goid 0030529] [evidence IEA]; go_function: single-stranded DNA binding [goid 0003697] [evidence IDA] [pmid 8152927]; go_function: RNA binding [goid 0003723] [evidence IDA] [pmid 8152927]; go_process: mRNA metabolism [goid 0016071] [evidence NAS]	1850.6	613.7	848.5	1267.8	1747.7	650.4	1483.3	2426.8	1209.1	1531.9	2397.3	1637.7	861.2	845.9	3713.1	356.6	366.1	4389.7	3544.2	932.9
405	GI_19913427-S	NM_001693.2	ATP6V1B2	Homo sapiens ATPase, H+ transporting, lysosomal 56/58kDa, V1 subunit B, isoform 2 (ATP6V1B2), mRNA.	go_component: vacuolar hydrogen-transporting ATPase [goid 0000219] [evidence TAS] [pmid 2145275]; go_component: cytoplasm [goid 0005737] [evidence IEA]; go_component: proton-transporting two-sector ATPase complex [goid 0016469] [evidence IEA]; go_function: hydrogen ion transporter activity [goid 0015078] [evidence P] [pmid 2145275]; go_function: ATP-binding and phosphorylation-dependent chloride …	1946.6	548	648.4	1413.4	1826.3	841.7	1626.3	2897.4	1469	1559.4	2304.8	1178.7	1010.7	922.9	4186.2	462.2	414.7	3170.2	3693.8	491.8
406	GI_7382494-I	NM_000631.2	NCF4	Homo sapiens neutrophil cytosolic factor 4, 40kDa (NCF4), transcript variant 1, mRNA.	go_component: cytosol [goid 0005829] [evidence TAS] [pmid 8839867]; go_function: electron transporter activity [goid 0005489] [evidence NR]; go_process: defense response [goid 0006952] [evidence TAS] [pmid 8839867]; go_process: electron transport [goid 0006118] [evidence IEA]; go_process: intracellular signaling cascade [goid 0007242] [evidence IEA]	1863.1	560	623.2	1711.6	2262.2	1023.9	1578	3577.7	1227.3	1765.6	1818.7	1543.4	722.4	736.2	5325.8	268.7	272.5	2267.6	2858	579
407	GI_4507668-S	NM_003295.1	TPT1	Homo sapiens tumor protein, translationally-controlled 1 (TPT1), mRNA.	go_component: cytoplasm [goid 0005737] [evidence IEA]; go_component: extracellular space [goid 0005615] [evidence TAS] [pmid 7542803]; go_function: molecular_function unknown [goid 0005554] [evidence IEA]	898.2	1589.2	1698.7	1668.3	1304.4	1377.5	917.9	4308	1736.3	1540.2	1498.7	808.1	738.4	779.4	1910.8	467.5	456.5	4215.7	3754.2	816.5
408	GI_11038618-S	NM_001614.2	ACTG1	Homo sapiens actin, gamma 1 (ACTG1), mRNA.	go_component: actin filament [goid 0005884] [evidence IEA]; go_function: structural constituent of cytoskeleton [goid 0005200] [evidence NR]; go_function: motor activity [goid 0003774] [evidence IEA]	1406.2	875.3	1019.5	862.2	1924.8	571.6	1298.9	2092.2	1254.9	1300.9	3139.3	1123.7	756.3	702.9	4507.7	403.1	390	5069.9	3321.8	382.4
409	GI_42658525-S	XM_374498.2	LOC392758	Homo sapiens similar to CG14977-PA (LOC392758), mRNA.		1998.4	372.8	413.4	1429.7	1549.7	903.6	1310.9	2686.5	2104.8	2094.3	1710.7	1620.2	632.3	566.9	5001.6	248.2	263.7	2646	4260.1	478.3
410	GI_37552185-S	XM_351658.1	LOC375506	Homo sapiens similar to hypothetical protein BC006605 (LOC375506), mRNA.		1325.7	366.3	445.2	1054	1407.1	444.1	1040.5	2213.3	1366.9	2110.4	2013.8	1753.3	515.3	401	6693.7	279.9	230.3	4310	3647.7	664.9
411	GI_5902133-S	NM_007074.1	CORO1A	Homo sapiens coronin, actin binding protein, 1A (CORO1A), mRNA.	go_component: lysosomal membrane [goid 0005765] [evidence TAS] [pmid 10338208]; go_component: kinesin complex [goid 0005871] [evidence IEA]; go_component: actin cytoskeleton [goid 0015629] [evidence TAS] [pmid 9778037]; go_function: actin binding [goid 0003779] [evidence NR]; go_function: structural molecule activity [goid 0005198] [evidence TAS] [pmid 9778037]; go_process: transport [goid 000681…	1417.2	374.3	404	980	1693.6	541.6	1364.9	2968.4	1668.2	1590.4	3401.7	1363.1	871.8	778.8	5394.9	455.9	415.2	3225.2	2936.2	426.5
412	GI_37622900-A	NM_004089.2	DSIPI	Homo sapiens delta sleep inducing peptide, immunoreactor (DSIPI), transcript variant 2, mRNA.	go_component: nucleus [goid 0005634] [evidence IEA]; go_function: transcription factor activity [goid 0003700] [evidence TAS] [pmid 8982256]; go_process: regulation of transcription, DNA-dependent [goid 0006355] [evidence TAS] [pmid 8982256]	2606.1	676.6	763.2	936.2	1572.9	551.3	2006.1	2612.5	1392.8	1943.1	1961.6	1409.3	1080.6	949.8	3511.8	471.2	441	3002	3858.3	462.9
413	GI_40255270-S	NM_002738.4	PRKCB1	Homo sapiens protein kinase C, beta 1 (PRKCB1), mRNA.	go_component: cytoplasm [goid 0005737] [evidence TAS] [pmid 10828076]; go_component: plasma membrane [goid 0005886] [evidence TAS] [pmid 10828076]; go_function: protein kinase C activity [goid 0004697] [evidence TAS] [pmid 3755548]; go_function: protein-tyrosine kinase activity [goid 0004713] [evidence IEA]; go_function: ATP binding [goid 0005524] [evidence IEA]; go_function: calcium ion binding …	1576.4	432.9	487.4	1355.4	2248	819.8	1372.4	3300.2	1157.9	1713.1	2375.5	1313.4	684.3	614.4	5044.9	287.6	262.7	3412.1	2941.9	442.4
414	GI_5032004-S	NM_005608.1	PTPRCAP	Homo sapiens protein tyrosine phosphatase, receptor type, C-associated protein (PTPRCAP), mRNA.	go_component: integral to plasma membrane [goid 0005887] [evidence NR]; go_function: antimicrobial peptide activity [goid 0003795] [evidence TAS] [pmid 7961877]	1689.6	450	494	1544.5	1192.4	926.4	1248.1	2142.9	1436.5	2151.9	2516.4	1650.5	567.3	574.3	4656.7	404.2	394.3	4026.7	3250.3	426
415	GI_16933547-A	NM_001002.2	RPLP0	Homo sapiens ribosomal protein, large, P0 (RPLP0), transcript variant 1, mRNA.	go_component: cytosolic large ribosomal subunit (sensu Eukarya) [goid 0005842] [evidence TAS] [pmid 3323886]; go_component: ribosome [goid 0005840] [evidence IEA]; go_component: intracellular [goid 0005622] [evidence IEA]; go_function: structural protein of ribosome [goid 0003735] [evidence E] [pmid 3323886]; go_function: RNA binding [goid 0003723] [evidence TAS] [pmid 3323886]; go_function: stru…	1261.6	833.1	1000.7	1347.8	1442.6	793.4	944.5	2474.5	2078	1741.3	1586.2	981.1	643.1	694.8	3297	362.5	329.9	5574.1	4005.5	347.7
416	GI_11038640-I	NM_021574.1	BCR	Homo sapiens breakpoint cluster region (BCR), transcript variant 2, mRNA.	go_function: protein serine/threonine kinase activity [goid 0004674] [evidence E] [pmid 1657398]; go_function: GTPase activator activity [goid 0005096] [evidence E] [pmid 1903516]; go_process: protein amino acid phosphorylation [goid 0006468] [evidence E] [pmid 1657398]; go_process: oncogenesis [goid 0007048] [evidence P] [pmid 1903516]; go_process: signal transduction [goid 0007165] [evidence P]…	1976.1	214.4	357.9	1688.3	2090.6	1168.1	1041.7	800.1	1955.4	1162.7	1658.5	1186.8	334.1	231.6	5990.1	242.4	227.8	3935.9	4114.2	1139.7
417	GI_10835070-S	NM_004355.1	CD74	Homo sapiens CD74 antigen (invariant polypeptide of major histocompatibility complex, class II antigen-associated) (CD74), mRNA.	go_component: integral to membrane [goid 0016021] [evidence TAS] [pmid 6324166]; go_function: class II major histocompatibility complex antigen [goid 0003821] [evidence TAS] [pmid 6324166]; go_function: chaperone activity [goid 0003754] [evidence IEA]; go_function: MHC class II receptor activity [goid 0045012] [evidence TAS]; go_process: immune response [goid 0006955] [evidence IEA]	1573.5	429.4	452	979.9	1072.6	512.7	1524	1297.6	1047.8	1417.3	2590.4	1066.8	934.5	903.3	6731	629.8	588.2	3466	3925.1	350.6
418	GI_19743893-I	NM_133480.1	TADA3L	Homo sapiens transcriptional adaptor 3 (NGG1 homolog, yeast)-like (TADA3L), transcript variant 2, mRNA.	go_component: nucleus [goid 0005634] [evidence TAS] [pmid 9674425]; go_function: transcription factor activity [goid 0003700] [evidence TAS] [pmid 9674425]; go_process: regulation of cell cycle [goid 0000074] [evidence NR] [pmid 9674425]; go_process: regulation of transcription from Pol II promoter [goid 0006357] [evidence TAS] [pmid 9674425]	1446.8	162.6	219.5	1295.9	1402.3	622.5	960.4	4242.5	1162.2	2638.7	1597.1	2281.8	136.6	84.3	8088.2	69.6	58.6	2296.5	1892.7	744.6
419	GI_17482322-S	XM_064859.1	LOC125910	Homo sapiens similar to 40S ribosomal protein S15a (LOC125910), mRNA.		830.5	889.6	1092.5	1365.8	1034.3	1418.9	763	4246	1399.6	1613.7	1253.5	515	865.9	562.3	2999.5	343.1	350.4	5461.3	3828.2	448.6
420	GI_10801344-S	NM_013234.1	eIF3k	Homo sapiens eukaryotic translation initiation factor 3 subunit k (eIF3k), mRNA.		1714.1	521.6	609.3	1248.9	1527.3	697.9	1417.1	1722.8	1475.4	2045.4	2208.2	1494.7	666.1	622.8	5355	424.3	416.6	3643.6	2913.1	547.4
421	GI_32490558-S	NM_014045.2	LRP10	Homo sapiens low density lipoprotein receptor-related protein 10 (LRP10), mRNA.		1812.7	261.2	306.8	874.5	2264	559.8	1646.2	2137.4	1374.7	1796.6	2618.6	1774.6	639.2	642.6	4947.4	384.6	371	2653.8	3164.7	877.8
422	GI_41393596-S	NM_015989.3	CSAD	Homo sapiens cysteine sulfinic acid decarboxylase (CSAD), mRNA.		1481.9	234.3	264.4	1334.3	1631.7	605.6	1142.6	2732.1	1039.1	1889.6	1528.5	1675.2	250.9	180.9	8108.9	108.8	92.7	3028.8	3168.7	596.6
423	GI_4507520-S	NM_001064.1	TKT	Homo sapiens transketolase (Wernicke-Korsakoff syndrome) (TKT), mRNA.	go_function: transketolase activity [goid 0004802] [evidence TAS] [pmid 8419340]; go_function: transferase activity [goid 0016740] [evidence IEA]; go_function: calcium ion binding [goid 0005509] [evidence IEA]	1981.5	325.8	382.1	962.3	1986.6	607.2	1916.7	2188.9	1462.8	1735.9	2867.5	1044.8	693.1	750.5	4745.2	378.4	357.7	3025.2	3099	390.5
424	GI_5902013-S	NM_006985.1	NPIP	Homo sapiens nuclear pore complex interacting protein (NPIP), mRNA.		1406.4	310.5	397	1142.5	2224.4	344.4	1115	2516.9	1716.3	1609.5	4134.4	1596.4	461.5	414.6	5415.6	246.9	261.7	2994.3	1747.2	784.7
425	GI_19913435-S	NM_003945.2	ATP6V0E	Homo sapiens ATPase, H+ transporting, lysosomal 9kDa, V0 subunit e (ATP6V0E), mRNA.	go_component: vacuolar hydrogen-transporting ATPase [goid 0000219] [evidence TAS] [pmid 9556572]; go_component: integral to membrane [goid 0016021] [evidence IEA]; go_component: membrane fraction [goid 0005624] [evidence TAS] [pmid 9556572]; go_function: adenosinetriphosphatase activity [goid 0004002] [evidence TAS] [pmid 9556572]; go_function: transporter activity [goid 0005215] [evidence NR] [p…	1579.9	591.7	693	1301.2	1814	859.1	1199.6	2471.4	1451.7	1926.1	2283.7	1417.4	725.1	677.2	3760	336	349	3498.2	3248.8	601
426	GI_31341350-S	NM_174896.2	MGC24133	Homo sapiens hypothetical protein MGC24133 (MGC24133), mRNA.		1871.9	446.8	489.7	1516.8	2038.5	678.1	1562.8	2445	1661.4	2228.1	1641.1	1629.3	630.1	617.2	4657.2	302.9	291.5	2774.3	2767.8	505.6
427	GI_15147251-S	NM_018957.2	SH3BP1	Homo sapiens SH3-domain binding protein 1 (SH3BP1), mRNA.		1631.6	476.5	626.1	1473	1839.1	755.6	1446	2301.1	1296	1860.1	1961.3	1559.3	702.6	602.1	5066.3	219.4	222.8	3515.8	2566.9	523.4
428	GI_29126237-S	NM_001207.3	BTF3	Homo sapiens basic transcription factor 3 (BTF3), mRNA.	go_component: nucleus [goid 0005634] [evidence IEA]; go_function: RNA polymerase II transcription factor activity [goid 0003702] [evidence TAS] [pmid 1386332]; go_function: DNA binding [goid 0003677] [evidence IEA]; go_process: transcription from Pol II promoter [goid 0006366] [evidence TAS] [pmid 2320128]; go_process: regulation of transcription, DNA-dependent [goid 0006355] [evidence IEA]	1446.7	1027.2	1304.8	1272.9	1268.9	891.9	1119.3	1709.1	1656.9	1604.2	1173	1008	732.3	749.6	4375	442.3	437.9	4566.2	2978	866.9
429	GI_12669906-S	NM_021122.2	FACL2	Homo sapiens fatty-acid-Coenzyme A ligase, long-chain 2 (FACL2), mRNA.		1293.9	560.4	646.4	1145	2478.3	901.8	1089.2	3279.9	865.5	1171.7	2353	972.9	1326.2	658.4	2763.9	313.4	192.1	3559	4549	439.3
430	GI_8670549-S	NM_013385.2	PSCD4	Homo sapiens pleckstrin homology, Sec7 and coiled-coil domains 4 (PSCD4), mRNA.	go_function: ARF guanyl-nucleotide exchange factor activity [goid 0005086] [evidence TAS] [pmid 10652308]	2075.1	268.7	322.1	1035.4	2090	588.1	1642.9	2053.4	1365.8	1921	1553.5	1912.9	675.3	714	3656.1	294	284.2	3414.2	3850.4	635.7
431	GI_28872795-S	NM_005194.2	CEBPB	Homo sapiens CCAAT/enhancer binding protein (C/EBP), beta (CEBPB), mRNA.	go_component: nucleus [goid 0005634] [evidence TAS] [pmid 10821850]; go_function: transcription activating factor [goid 0003710] [evidence E]; go_function: DNA binding [goid 0003677] [evidence E]; go_function: transcription factor activity [goid 0003700] [evidence NR] [pmid 10821850]; go_function: translation regulator activity [goid 0045182] [evidence IEA]; go_process: acute-phase response [goid…	1464.6	583.7	677.4	1059.3	1717.8	693.5	1234.2	1960.3	916.2	1386	2134.3	1157.9	1146.1	1109.9	4512	322.9	320.1	2741.6	4599.9	409.3
432	GI_5031910-S	NM_005874.1	LILRB2	Homo sapiens leukocyte immunoglobulin-like receptor, subfamily B (with TM and ITIM domains), member 2 (LILRB2), mRNA.	go_component: membrane fraction [goid 0005624] [evidence TAS] [pmid 9079806]; go_component: integral to plasma membrane [goid 0005887] [evidence TAS] [pmid 9079806]; go_component: integral to membrane [goid 0016021] [evidence IEA]; go_function: defense/immunity protein activity [goid 0003793] [evidence TAS] [pmid 9382880]; go_function: receptor activity [goid 0004872] [evidence IEA] [pmid 9382880…	1379	518.2	626.8	1183.6	2115.8	593.9	1220.6	3284.5	1146.9	1430.6	1563.4	1329.6	1004	848.6	4090.5	262.5	241.1	3057	3772	459.5
433	GI_4503562-S	NM_001425.1	EMP3	Homo sapiens epithelial membrane protein 3 (EMP3), mRNA.	go_component: integral to membrane [goid 0016021] [evidence IEA]; go_component: membrane fraction [goid 0005624] [evidence NR]; go_process: negative regulation of cell proliferation [goid 0008285] [evidence TAS] [pmid 8996089]; go_process: cell death [goid 0008219] [evidence NR]; go_process: development [goid 0007275] [evidence NR]; go_process: cell proliferation [goid 0008283] [evidence NR]; go_…	1634.3	458.9	578.7	1120.8	1699.3	744.6	1353.9	1682.8	1337.2	1936	2076.1	1338.2	702.2	628.6	3834.3	420	359.2	3787.7	3843.3	468.3
434	GI_34147571-S	NM_002201.4	ISG20	Homo sapiens interferon stimulated gene 20kDa (ISG20), mRNA.	go_component: nucleoplasm [goid 0005654] [evidence TAS] [pmid 9235947]; go_component: intracellular [goid 0005622] [evidence IEA]; go_function: exonuclease activity [goid 0004527] [evidence IEA]; go_process: cell proliferation [goid 0008283] [evidence TAS] [pmid 9569007]	1402.8	674.3	757.5	1455.6	1722.1	845	1286.6	2768.6	1023.7	1523.4	1327.8	1262.5	813.4	731.7	4872.4	357.4	334.8	3283.3	3174.1	343.4
435	GI_11386156-S	NM_001785.1	CDA	Homo sapiens cytidine deaminase (CDA), mRNA.	go_function: cytidine deaminase activity [goid 0004126] [evidence TAS] [pmid 7923172]; go_function: zinc ion binding [goid 0008270] [evidence IEA]; go_function: hydrolase activity [goid 0016787] [evidence IEA]; go_process: nucleobase, nucleoside, nucleotide and nucleic acid metabolism [goid 0006139] [evidence TAS] [pmid 7923172]; go_process: cytidine metabolism [goid 0046087] [evidence IEA]	1332.3	354.4	404.8	992.1	1840.3	968.6	1162.9	2640.1	1360.1	1881.1	2133.6	1100.9	970.7	887.4	6821.9	202	203.9	1582.2	2558.8	468.2
436	GI_12232456-S	NM_022774.1	FLJ21144	Homo sapiens hypothetical protein FLJ21144 (FLJ21144), mRNA.		1231.4	219.9	263.3	935.2	1457.8	451.3	849	2013.1	1438.2	1841.9	2044.6	1716.7	344.9	311.8	7071.5	217.2	176.4	3414	3161.5	656.5
437	GI_11038642-A	NM_021575.1	AP2S1	Homo sapiens adaptor-related protein complex 2, sigma 1 subunit (AP2S1), transcript variant AP17delta, mRNA.	go_component: coated vesicle [goid 0005909] [evidence NR]; go_function: vesicle transport [goid 0005480] [evidence NR]	1342.4	611.7	719.3	907.7	1413.3	590.7	1193.3	1180.5	1219.9	1454.7	1469.2	1047.6	784.8	747.6	5674.6	423.7	416.3	3871.5	3840.6	661.2
438	GI_7669474-A	NM_015841.1	ADAR	Homo sapiens adenosine deaminase, RNA-specific (ADAR), transcript variant ADAR-c, mRNA.	go_component: nucleus [goid 0005634] [evidence E] [pmid 7862132]; go_function: double-stranded RNA adenosine deaminase activity [goid 0003726] [evidence E] [pmid 9020165]; go_process: antimicrobial humoral response (sensu Invertebrata) [goid 0006960] [evidence P] [pmid 7618288]	1273.4	341.3	408	1467.9	2665.2	684.1	1035.5	4070.3	1232.9	1976.1	1816	1639.8	591.4	527.8	3865.4	216.8	237.5	2459.3	2528.1	486
439	GI_20070320-S	NM_022787.2	NMNAT1	Homo sapiens nicotinamide nucleotide adenylyltransferase 1 (NMNAT1), mRNA.	go_component: nucleus [goid 0005634] [evidence IDA] [pmid 11248244]; go_function: protein binding [goid 0005515] [evidence IPI] [pmid 11248244]; go_function: magnesium ion binding [goid 0000287] [evidence IEA]; go_function: transferase activity [goid 0016740] [evidence IEA]; go_function: nicotinamide-nucleotide adenylyltransferase activity [goid 0000309] [evidence IDA] [pmid 11027696]; go_process…	1466.1	202.7	239.7	1225.9	1401.6	580.8	896.4	3339.1	1140.8	2163	1273.2	1707.5	164.9	112.8	8160.8	77.5	79.5	2261.6	2233.7	650.7
440	GI_37550226-S	XM_352588.1	LOC377296	Homo sapiens similar to 60S RIBOSOMAL PROTEIN L21 (LOC377296), mRNA.		1123.5	531.1	623.9	1427.5	2070.1	874.3	824.9	3137.4	2801.4	2186.6	1414.7	699.7	591.2	61.5	3255.5	390.4	243.4	3931.6	2292.4	884.1
441	GI_42662266-S	XM_371390.2	LOC388783	Homo sapiens similar to hypothetical protein (LOC388783), mRNA.		1382.1	396.6	441.8	999.8	1455.5	714.3	1129.4	1469	1619.6	1205.8	1514.1	1521.4	268.6	195.8	6981.4	193.6	184.7	2734.2	4224.4	643.7
442	GI_11545816-S	NM_022107.1	GPSM3	Homo sapiens G-protein signalling modulator 3 (AGS3-like, C. elegans) (GPSM3), mRNA.		1407.9	352.1	404.4	741.3	1430.9	536.1	1247.4	1764.5	1290.4	1789.3	2002.2	1686.4	636.8	613	4885.9	332	293.9	3147.2	4186.6	464.2
443	GI_18641378-S	NM_019111.2	HLA-DRA	Homo sapiens major histocompatibility complex, class II, DR alpha (HLA-DRA), mRNA.	go_component: integral to plasma membrane [goid 0005887] [evidence NAS] [pmid 6812963]; go_function: MHC class II receptor activity [goid 0045012] [evidence NAS] [pmid 6812963]; go_process: immune response [goid 0006955] [evidence NAS] [pmid 6812963]; go_process: antigen presentation, exogenous antigen [goid 0019884] [evidence IEA]; go_process: antigen processing, exogenous antigen via MHC class …	1469.5	421.4	457.7	1488.7	1284.3	715	1193.2	2862.5	1801.3	1947.7	1679.6	1272.5	539.6	499.6	3224.4	314.7	314.8	3718	3500.3	477
444	GI_42476192-S	NM_016127.4	MGC8721	Homo sapiens hypothetical protein MGC8721 (MGC8721), mRNA.		1744.7	581.4	669.7	1128.6	1436.7	507.2	1435.5	3139.6	1386.2	1443.2	2091.7	1126.3	843.9	673.2	2556	384.3	344.7	3598.8	3702.2	387.6
445	GI_42658911-S	XM_376787.1	LOC401470	Homo sapiens similar to 40S ribosomal protein S26 (LOC401470), mRNA.		1693.4	409.4	500.3	1449.3	1211.5	675.6	1275.2	3044	1215.1	1600.8	2591	1970.8	456.7	251.2	4351.3	220.1	165.2	4242.3	1665.8	170.6
446	GI_4503518-S	NM_003754.1	EIF3S5	Homo sapiens eukaryotic translation initiation factor 3, subunit 5 epsilon, 47kDa (EIF3S5), mRNA.	go_component: eukaryotic translation initiation factor 3 complex [goid 0005852] [evidence TAS] [pmid 9341143]; go_function: translation initiation factor activity [goid 0003743] [evidence TAS] [pmid 9341143]; go_process: regulation of translational initiation [goid 0006446] [evidence TAS] [pmid 9341143]	1483.4	712.3	700.5	1074.5	1252.6	499.9	1292.4	1787.3	1131.1	1510.3	2126.4	1142.4	887.3	832.3	3432.4	461.7	505.4	4235.1	3625.1	276.7
447	GI_41149627-S	XM_370649.1	LOC387805	Homo sapiens similar to ARP2/3 complex 21 kDa subunit (p21-ARC) (Actin-related protein 2/3 complex subunit 3) (LOC387805), mRNA.		1602.5	552.5	580.3	1325.1	1826.1	1123.1	1373.2	2127.3	1612.3	1855	1842.9	976.1	930.5	833.3	3256.5	366.8	354.3	3083.6	2769.9	504.7
448	GI_15431304-A	NM_000973.2	RPL8	Homo sapiens ribosomal protein L8 (RPL8), transcript variant 1, mRNA.	go_component: cytosolic large ribosomal subunit (sensu Eukarya) [goid 0005842] [evidence TAS] [pmid 7506540]; go_component: ribosome [goid 0005840] [evidence IEA]; go_component: intracellular [goid 0005622] [evidence IEA]; go_function: structural protein of ribosome [goid 0003735] [evidence P] [pmid 7506540]; go_function: RNA binding [goid 0003723] [evidence TAS] [pmid 7506540]; go_function: stru…	1189.5	618.1	750.9	887.6	1166.2	754.2	721.8	1709.2	1729.2	1586.8	1794.9	1130.4	384.8	306.1	5337.1	252.3	229.3	4388.2	3484.2	420.7
449	GI_21237760-S	NM_004356.2	CD81	Homo sapiens CD81 antigen (target of antiproliferative antibody 1) (CD81), mRNA.	go_component: integral to plasma membrane [goid 0005887] [evidence TAS] [pmid 1695320]; go_component: plasma membrane [goid 0005886] [evidence NR]; go_process: defense response [goid 0006952] [evidence TAS] [pmid 1695320]; go_process: cell proliferation [goid 0008283] [evidence TAS] [pmid 1695320]; go_process: protein complex assembly [goid 0006461] [evidence NR]	1413.1	654.2	740.5	1562	1410.2	733.2	1201.4	1499.9	1022.8	1931.8	1470.1	1052	807.6	764.7	4165.4	451.3	415.3	3811.8	3225.1	414.1
450	GI_20070210-S	NM_005801.2	SUI1	Homo sapiens putative translation initiation factor (SUI1), mRNA.	go_component: cytoplasm [goid 0005737] [evidence P] [pmid 10347211]; go_function: translation initiation factor activity [goid 0003743] [evidence P] [pmid 7904817]; go_function: translation factor activity, nucleic acid binding [goid 0008135] [evidence E] [pmid 10347211]; go_function: tumor suppressor [goid 0008181] [evidence E] [pmid 10208429]; go_process: cell growth and/or maintenance [goid 00…	1265.5	1213.4	1396.4	936	1296	928.2	1027.1	1356.3	1113.9	1321	1532.7	850.4	918.9	870.6	3386.1	361.5	349.2	4342.1	2843.9	1303.5
451	GI_5713320-S	NM_000655.2	SELL	Homo sapiens selectin L (lymphocyte adhesion molecule 1) (SELL), mRNA.	go_component: integral to plasma membrane [goid 0005887] [evidence TAS] [pmid 1692315]; go_component: plasma membrane [goid 0005886] [evidence P] [pmid 1692315]; go_function: selectin [goid 0008337] [evidence TAS] [pmid 10747985]; go_function: cell adhesion molecule activity [goid 0005194] [evidence IEA]; go_function: lectin [goid 0005530] [evidence IEA]; go_function: sugar binding [goid 0005529]…	1066.7	694.4	843	1192.6	1711.1	686.5	1030.7	1916	1086.5	1401.7	2364.9	854.7	804.4	746.2	3489	503.8	474.8	3258.8	4084.7	334
452	GI_8922429-S	NM_018097.1	FLJ10460	Homo sapiens hypothetical protein FLJ10460 (FLJ10460), mRNA.		1267.5	165	193.9	1163.9	1443	619.5	904.6	2564.1	1180.2	1747.7	1312.3	1681.4	169.2	90.7	8466	77.1	66	2424.1	2348.3	637
453	GI_31377778-S	NM_007271.2	STK38	Homo sapiens serine/threonine kinase 38 (STK38), mRNA.	go_component: nucleus [goid 0005634] [evidence TAS] [pmid 7761441]; go_function: protein serine/threonine kinase activity [goid 0004674] [evidence TAS] [pmid 7761441]; go_function: ATP binding [goid 0005524] [evidence IEA]; go_function: transferase activity [goid 0016740] [evidence IEA]; go_process: protein modification [goid 0006464] [evidence P] [pmid 7761441]; go_process: protein amino acid ph…	1564.5	476	543.9	1861.7	1755.2	818.4	1189	2498	1331.6	1550.3	1839.3	970.3	828.9	626.6	3658.6	301.2	255	3336	2465.4	512.2
454	GI_18490986-S	NM_016183.2	C1orf33	Homo sapiens chromosome 1 open reading frame 33 (C1orf33), mRNA.	go_component: ribosome [goid 0005840] [evidence IEA]; go_component: intracellular [goid 0005622] [evidence IEA]; go_function: structural constituent of ribosome [goid 0003735] [evidence IEA]; go_process: protein biosynthesis [goid 0006412] [evidence IEA]	1226.3	606.8	703.5	861.6	1134.9	538.4	965.6	1474.7	1163.8	1701.7	1702.9	1329.6	675.9	693.2	4703	383.2	351.2	3811.6	3830.7	519.1
455	GI_31543081-S	NM_016496.3	LOC51257	Homo sapiens hypothetical protein LOC51257 (LOC51257), mRNA.	go_function: electron transporter activity [goid 0005489] [evidence IEA]; go_process: electron transport [goid 0006118] [evidence IEA]	1567.9	423.2	446.2	1007.2	1585.8	973.7	1223	1136.5	1432.7	1231.3	1502.7	1329.9	600.9	620	3943.2	499.3	531.4	3267.7	4007.3	1038.6
456	GI_37541412-S	XM_055195.5	XPO6	Homo sapiens exportin 6 (XPO6), mRNA.		2005.8	468.2	566.6	1131.9	1778.1	645.5	1514.4	2165.7	1160.3	1487.7	1518.1	1267	690.7	697.8	4749.2	288.3	285.4	2456.8	3017.6	466.5
457	GI_23510435-S	NM_001242.3	TNFRSF7	Homo sapiens tumor necrosis factor receptor superfamily, member 7 (TNFRSF7), mRNA.	go_component: integral to membrane [goid 0016021] [evidence IEA]; go_component: plasma membrane [goid 0005886] [evidence TAS] [pmid 2837508]; go_component: extracellular [goid 0005576] [evidence NAS]; go_component: integral to plasma membrane [goid 0005887] [evidence NAS]; go_function: transmembrane receptor activity [goid 0004888] [evidence NAS]; go_function: protein binding [goid 0005515] [evid…	1266.4	554.5	621.6	1107.7	1436.9	630.8	1120	2042.7	1305.6	1159.2	1937.6	1286.3	629.1	474.2	6238.4	474.1	423	2872.4	2446.1	328.9
458	GI_22165429-A	NM_001157.2	ANXA11	Homo sapiens annexin A11 (ANXA11), transcript variant a, mRNA.	go_component: cytoplasm [goid 0005737] [evidence TAS] [pmid 7508441]; go_component: nucleus [goid 0005634] [evidence TAS] [pmid 7508441]; go_component: nuclear membrane [goid 0005635] [evidence NAS]; go_component: nucleoplasm [goid 0005654] [evidence NAS]; go_function: phospholipid binding [goid 0005543] [evidence P] [pmid 7508441]; go_function: calcium-dependent phospholipid binding [goid 000554…	1491.7	416	450.7	1094.2	2208	600.1	1314.7	2352.5	1196.6	1663.7	1752.4	1327.4	647.8	633.8	4836.6	262.3	258	2598.7	2849.8	361.9
459	GI_18641372-S	NM_021983.3	HLA-DRB4	Homo sapiens major histocompatibility complex, class II, DR beta 4 (HLA-DRB4), mRNA.	go_component: integral to plasma membrane [goid 0005887] [evidence NR]; go_function: class II major histocompatibility complex antigen [goid 0003821] [evidence NR]; go_process: signal transduction [goid 0007165] [evidence NR]	1398.6	685.8	752.3	1701.5	1257	971.6	1343.1	1546.1	1423.1	1015	2078.6	712.9	574.5	490.6	1689.6	93.2	73.4	6281.3	3878.7	169.6
460	GI_31543079-S	NM_173647.2	RNF149	Homo sapiens ring finger protein 149 (RNF149), mRNA.	go_function: peptidase activity [goid 0008233] [evidence IEA]; go_function: transferase activity, transferring glycosyl groups [goid 0016757] [evidence IEA]; go_process: proteolysis and peptidolysis [goid 0006508] [evidence IEA]; go_process: metabolism [goid 0008152] [evidence IEA]	1384.3	703	759.3	1030.5	1191.3	750	1331	3043	935.9	1187.7	1607.7	930.9	975.3	832.8	2033.9	337.1	330.1	3484.1	4691.1	397.4
461	GI_30240931-S	NM_006795.2	EHD1	Homo sapiens EH-domain containing 1 (EHD1), mRNA.	go_component: kinesin complex [goid 0005871] [evidence IEA]; go_component: cellular_component unknown [goid 0008372] [evidence ND]; go_component: intracellular [goid 0005622] [evidence IEA]; go_function: ATP binding [goid 0005524] [evidence IEA]; go_function: calcium ion binding [goid 0005509] [evidence IEA]; go_function: molecular_function unknown [goid 0005554] [evidence ND]; go_function: DNA b…	1156.6	509	550.8	890.1	1707.7	429.5	1002.8	1621.8	926.6	1592.4	1895.2	891.9	890.5	803.6	5433.4	424.6	429.6	3253	2981.7	470.7
462	GI_21495177-S	NM_145111.1	DKFZp727G131	Homo sapiens hypothetical protein DKFZp727G131 (DKFZp727G131), mRNA.		1304.7	306.6	317.5	1137.9	1469.2	582	957.4	2577.4	990.6	1806.3	1651.9	1713.8	261.3	173.6	6743.8	134.3	112.7	2590.4	2303.2	638.8
463	GI_34222193-S	NM_019067.3	FLJ10613	Homo sapiens hypothetical protein FLJ10613 (FLJ10613), mRNA.	go_component: membrane [goid 0016020] [evidence IEA]; go_function: peptidase activity [goid 0008233] [evidence IEA]; go_process: proteolysis and peptidolysis [goid 0006508] [evidence IEA]	1230.4	259.8	353.3	890.5	1305.2	426.9	779.9	2004.7	1257.4	1777.7	1921.6	1518.6	365.3	361.6	6168.4	188.5	176.8	3352.9	2820.5	517.7
464	GI_42656794-S	XM_376257.1	LOC401082	Homo sapiens similar to hypothetical protein FLJ25976 (LOC401082), mRNA.		1001.7	203.9	256.8	898.4	1091	518.9	792.4	2282.1	963.9	1531	1190.3	1410.7	155.6	125.7	9374.2	66.1	65.4	2357.6	2837.3	500.1
465	GI_8923377-S	NM_017806.1	FLJ20406	Homo sapiens hypothetical protein FLJ20406 (FLJ20406), mRNA.		1540.5	273.4	302.2	1666	1357.8	852.4	1410.8	2399.4	1342.1	2429.3	1882.2	1664	387	356.8	4373.6	231.6	237.6	2416.9	2045.5	448.6
466	GI_9951921-S	NM_006384.2	CIB1	Homo sapiens calcium and integrin binding 1 (calmyrin) (CIB1), mRNA.	go_function: protein binding [goid 0005515] [evidence TAS] [pmid 9372844]; go_function: cell adhesion molecule activity [goid 0005194] [evidence P] [pmid 9030514]; go_function: calcium ion binding [goid 0005509] [evidence IEA]; go_process: double-strand break repair [goid 0006302] [evidence TAS] [pmid 9372844]; go_process: cell adhesion [goid 0007155] [evidence TAS] [pmid 9030514]	1410.8	412.9	452.5	1572.8	1568.1	1235.3	1114.4	1950.7	1232.7	1478.2	1355.4	1399.3	566.3	542.9	3596.3	229.7	219.9	3270	3593.1	415.9
467	GI_14591908-S	NM_000969.2	RPL5	Homo sapiens ribosomal protein L5 (RPL5), mRNA.	go_component: cytosolic large ribosomal subunit (sensu Eukarya) [goid 0005842] [evidence TAS] [pmid 7772601]; go_component: ribosome [goid 0005840] [evidence IEA]; go_component: intracellular [goid 0005622] [evidence IEA]; go_function: structural protein of ribosome [goid 0003735] [evidence P] [pmid 7772601]; go_function: RNA binding [goid 0003723] [evidence P] [pmid 7772601]; go_function: struct…	1360.4	818	925.7	1488.3	1414.2	1006.3	1182	1823.4	1418.3	1572.9	1464.1	858.6	900.7	801.2	3052.4	536.4	560.1	3761.6	2342.8	328.1
468	GI_10835186-S	NM_000636.1	SOD2	Homo sapiens superoxide dismutase 2, mitochondrial (SOD2), mRNA.	go_component: mitochondrion [goid 0005739] [evidence NR]; go_function: manganese superoxide dismutase activity [goid 0008383] [evidence P]; go_process: response to oxidative stress [goid 0006979] [evidence E]	1524.6	656.3	773.2	858.1	1501.4	677.4	1474	2253.7	1062.1	1284.1	1934.9	1091.1	1186.5	1088.5	3190.2	327.9	305.2	2559.5	3286.6	562.3
469	GI_4504720-S	NM_002198.1	IRF1	Homo sapiens interferon regulatory factor 1 (IRF1), mRNA.	go_component: nucleus [goid 0005634] [evidence IEA]; go_function: transcription activating factor [goid 0003710] [evidence E] [pmid 7507207]; go_function: transcription factor activity [goid 0003700] [evidence IEA]; go_function: translation regulator activity [goid 0045182] [evidence IEA]; go_process: oncogenesis [goid 0007048] [evidence TAS] [pmid 7507207]; go_process: transcription from Pol II …	1657.3	485.3	538.2	1529.6	1968.8	639.6	1362.3	2910.4	1204.4	2049.5	1041.1	1496.3	552.4	456.1	3857.2	177.7	173.5	2152.1	2780.2	547.7
470	GI_4502056-S	NM_000698.1	ALOX5	Homo sapiens arachidonate 5-lipoxygenase (ALOX5), mRNA.	go_function: arachidonate 5-lipoxygenase activity [goid 0004051] [evidence TAS] [pmid 2829172]; go_function: lipoxygenase activity [goid 0016165] [evidence IEA]; go_function: iron ion binding [goid 0005506] [evidence IEA]; go_function: oxidoreductase activity [goid 0016491] [evidence IEA]; go_process: leukotriene metabolism [goid 0006691] [evidence P] [pmid 3422434]; go_process: electron transpor…	1405.6	696.9	833.6	1461.1	2010.8	854.6	1239	2061.6	793.6	1137	1614.5	771.5	903.1	870.9	3731	262.3	262.9	2493.9	3694.9	467.9
471	GI_23397667-S	NM_005719.2	ARPC3	Homo sapiens actin related protein 2/3 complex, subunit 3, 21kDa (ARPC3), mRNA.	go_component: Arp2/3 protein complex [goid 0005885] [evidence TAS] [pmid 9230079]; go_component: actin cytoskeleton [goid 0015629] [evidence P] [pmid 9230079]; go_function: structural constituent of cytoskeleton [goid 0005200] [evidence TAS] [pmid 9230079]; go_process: cell motility [goid 0006928] [evidence TAS] [pmid 9230079]	1459.2	586.8	671	1291.1	1729.1	1107.7	1500.8	1741.2	1417.3	1677.7	1622.6	938.6	923.1	908.2	3341.5	389.2	377.1	2765.5	2512.1	528.8
472	GI_7705432-S	NM_016091.1	EIF3S6IP	Homo sapiens eukaryotic translation initiation factor 3, subunit 6 interacting protein (EIF3S6IP), mRNA.	go_function: translation initiation factor activity [goid 0003743] [evidence IEA]; go_process: protein biosynthesis [goid 0006412] [evidence IEA]	1652.8	468.8	545	1161.1	1627.8	552.4	1336.2	1634.9	1357.2	1626.4	1858.1	1173.5	699.1	655.1	3865.1	444.6	406.6	3137.1	2931.2	352.5
473	GI_8922778-S	NM_018277.1	C21orf77	Homo sapiens chromosome 21 open reading frame 77 (C21orf77), mRNA.		1224.9	149.7	174	836.5	1313.2	478.8	670.2	2013.2	1584.7	1954.3	1499	1964.3	189	137.8	7098.9	95.2	78	2827	2393.6	797.9
474	GI_4758043-S	NM_004074.1	COX8	Homo sapiens cytochrome c oxidase subunit VIII (COX8), mRNA.	go_component: mitochondrion [goid 0005739] [evidence NR]; go_function: cytochrome-c oxidase activity [goid 0004129] [evidence TAS] [pmid 2543673]; go_function: oxidoreductase activity [goid 0016491] [evidence IEA]; go_process: energy pathways [goid 0006091] [evidence TAS] [pmid 2543673]; go_process: electron transport [goid 0006118] [evidence IEA]	1438	342.1	398.4	1208.2	1439.7	892.8	1192.4	1937.8	1243	1932.1	2011.9	1540.2	455.3	436.7	4412.4	236.7	241.8	2352.9	3181.4	448.5
475	GI_4505256-S	NM_002444.1	MSN	Homo sapiens moesin (MSN), mRNA.	go_component: cytoskeleton [goid 0005856] [evidence TAS] [pmid 1924289]; go_component: plasma membrane [goid 0005886] [evidence TAS] [pmid 8188263]; go_function: structural constituent of cytoskeleton [goid 0005200] [evidence TAS] [pmid 1924289]; go_process: cell motility [goid 0006928] [evidence NR]	1098.9	418.4	463.3	1028.1	1707.3	581.6	983.3	2396.1	1038.6	1285.9	2314.6	1132.6	676.7	639	4795.7	293.5	293.5	2938.9	2864.8	383.4
476	GI_21618360-S	NM_014164.3	FXYD5	Homo sapiens FXYD domain containing ion transport regulator 5 (FXYD5), mRNA.	go_component: integral to membrane [goid 0016021] [evidence IDA]; go_function: ion channel activity [goid 0005216] [evidence IEA]; go_function: actin binding [goid 0003779] [evidence IDA]; go_function: cadherin binding [goid 0045296] [evidence IDA]; go_process: ion transport [goid 0006811] [evidence IEA]; go_process: microvillus assembly [goid 0030033] [evidence NAS]; go_process: negative regulat…	1166	454	507.5	829.6	1245.3	496.3	1125.8	1114.4	1164.4	1297.9	2114.1	1319.5	691.6	709.2	4767.4	428.6	418.5	3463.8	3661.7	331.4
477	GI_37539300-S	XM_353706.1	LOC378204	Homo sapiens similar to amyotrophic lateral sclerosis 2 (juvenile) chromosome region, candidate 2; ILP-interacting protein ILPIPA (LOC378204), mRNA.		1224.6	638.5	732.1	1214.6	1129	1160.6	1245.8	952.5	1281.5	889.9	1288.5	769.7	747.3	500.2	2542.4	580.6	450.6	5174.6	3248.3	1519.3
478	GI_4503240-S	NM_000896.1	CYP4F3	Homo sapiens cytochrome P450, family 4, subfamily F, polypeptide 3 (CYP4F3), mRNA.	go_component: membrane [goid 0016020] [evidence IEA]; go_component: microsome [goid 0005792] [evidence IEA]; go_component: endoplasmic reticulum [goid 0005783] [evidence IEA]; go_function: monooxygenase activity [goid 0004497] [evidence TAS] [pmid 8486631]; go_function: leukotriene-B4 20-monooxygenase activity [goid 0050051] [evidence IEA]; go_process: leukotriene metabolism [goid 0006691] [evide…	1677.7	176.2	193.7	1092.6	2176.7	669.6	1143.9	3813.9	1370.4	1755.5	1870.7	1369.5	259.4	228.7	5383.7	109.5	104.5	1472.1	1862.8	553.2
479	GI_38093664-S	NM_198284.1	LOC349114	Homo sapiens hypothetical protein LOC349114 (LOC349114), mRNA.		1491.2	687.8	835.3	1228.2	1410.3	1012.8	1164.1	1703.9	1186	1046.6	1907.9	1251.9	568.1	539.7	3278	345.9	326.1	2780.7	3990	528
480	GI_25777712-A	NM_170679.1	SKP1A	Homo sapiens S-phase kinase-associated protein 1A (p19A) (SKP1A), transcript variant 2, mRNA.		1059.2	733.4	845.3	1178	1141.4	989	952.2	1824	1153.5	1394.4	1564.6	891.6	949	739.3	3333	340.9	296.5	4806.9	2353.6	698.2
481	GI_27477108-S	NM_031483.3	ITCH	Homo sapiens itchy homolog E3 ubiquitin protein ligase (mouse) (ITCH), mRNA.	go_component: nucleus [goid 0005634] [evidence IEA]; go_function: ubiquitin-protein ligase activity [goid 0004842] [evidence IEA]; go_function: ligase activity [goid 0016874] [evidence IEA]; go_process: ubiquitin cycle [goid 0006512] [evidence IEA]	1418.8	240.2	312.5	1058.8	1182.9	542.6	995.2	2707.1	1022.6	1938	1708.9	1672.6	177.5	164	6725.5	91.2	91.5	2340.6	2301.7	532
482	GI_16306549-S	NM_003944.2	SELENBP1	Homo sapiens selenium binding protein 1 (SELENBP1), mRNA.	go_function: selenium binding [goid 0008430] [evidence P] [pmid 9027582]	1313.1	722	782.5	856.8	1160.2	705	1089.8	369	1045.6	622.4	737.7	528.6	1311.5	988.4	2779.6	667.6	660.2	6299.2	2459.7	2107.1
483	GI_32698764-S	NM_033086.1	FGD3	Homo sapiens FGD1 family, member 3 (FGD3), mRNA.	go_function: zinc ion binding [goid 0008270] [evidence IEA]	1785.5	235.3	266.6	1095.6	1861.3	529.6	1552.9	2148.1	1357.3	1526.3	3011.8	1397	548.1	499	3923.4	319.8	306.7	1933.8	2452.7	427.7
484	GI_4505184-S	NM_002415.1	MIF	Homo sapiens macrophage migration inhibitory factor (glycosylation-inhibiting factor) (MIF), mRNA.	go_component: extracellular space [goid 0005615] [evidence TAS] [pmid 2552447]; go_function: cytokine activity [goid 0005125] [evidence NR]; go_function: isomerase activity [goid 0016853] [evidence IEA]; go_process: immune response [goid 0006955] [evidence TAS] [pmid 2552447]; go_process: inflammatory response [goid 0006954] [evidence TAS] [pmid 2552447]	1445.4	351.6	393	1205.4	1289.2	874.4	1231.9	2149.2	1313.5	1648.9	1780.8	1449.7	590.5	545.9	4664.9	305.8	278	2516.3	2708.4	409.3
485	GI_5031782-S	NM_005534.1	IFNGR2	Homo sapiens interferon gamma receptor 2 (interferon gamma transducer 1) (IFNGR2), mRNA.	go_component: integral to plasma membrane [goid 0005887] [evidence TAS] [pmid 8910544]; go_function: interferon-gamma receptor activity [goid 0004906] [evidence TAS] [pmid 9616207]; go_function: antiviral response protein activity [goid 0003800] [evidence TAS] [pmid 8124716]; go_function: receptor activity [goid 0004872] [evidence IEA]; go_function: hematopoietin/interferon-class (D200-domain) cy…	1678.3	451.3	519.1	1185.3	1663.7	974.4	1649.4	2811.3	1079.9	1368.5	1888.4	1160.1	659.3	548.2	2710.5	253.6	243.4	2307	3482.7	429.8
486	GI_34147631-S	NM_003461.3	ZYX	Homo sapiens zyxin (ZYX), mRNA.	go_component: focal adhesion [goid 0008357] [evidence E] [pmid 8940160]; go_component: integral to plasma membrane [goid 0005887] [evidence TAS] [pmid 8940160]; go_component: plasma membrane [goid 0005886] [evidence E] [pmid 8940160]; go_function: cell adhesion molecule activity [goid 0005194] [evidence IEA] [pmid 8940160]; go_process: cell adhesion [goid 0007155] [evidence TAS] [pmid 8940160]; g…	1693.1	206	243.6	845.5	2346.1	560.4	1357.9	2576.4	1087.6	2024.3	1620	1807.6	628.4	585.9	4145.4	225.7	238.6	1916	2460.4	478
487	GI_18105047-S	NM_080593.1	HIST1H2BK	Homo sapiens histone 1, H2bk (HIST1H2BK), mRNA.	go_component: chromosome [goid 0005694] [evidence IEA]; go_component: nucleus [goid 0005634] [evidence IEA]; go_component: nucleosome [goid 0005718] [evidence IEA]; go_component: nucleosome [goid 0000786] [evidence IEA]; go_function: DNA binding [goid 0003677] [evidence IEA]; go_process: nucleosome assembly [goid 0006334] [evidence IEA]; go_process: chromosome organization and biogenesis (sensu E…	1117.1	527.9	630.4	1003.7	1081.3	683.2	1015.6	1424.4	802	1015.2	1757	1056.1	713.5	715.8	5020.1	430.4	411.8	2806	4228.3	500.6
488	GI_13259540-S	NM_003355.2	UCP2	Homo sapiens uncoupling protein 2 (mitochondrial, proton carrier) (UCP2), nuclear gene encoding mitochondrial protein, mRNA.	go_component: mitochondrial inner membrane [goid 0005743] [evidence NR] [pmid 9196039]; go_component: mitochondrion [goid 0005739] [evidence IEA]; go_component: integral to membrane [goid 0016021] [evidence IEA]; go_component: membrane fraction [goid 0005624] [evidence NR]; go_function: uncoupling protein activity [goid 0015302] [evidence TAS] [pmid 9054939]; go_function: binding [goid 0005488] […	1156.8	356.9	413.9	380.1	1019.2	289.1	994.9	993	788.1	836.4	3009.6	940.3	1331.3	1175	5268.8	569	527.4	3339.6	3020.6	475.4
489	GI_4507960-S	NM_003407.1	ZFP36	Homo sapiens zinc finger protein 36, C3H type, homolog (mouse) (ZFP36), mRNA.	go_component: nucleus [goid 0005634] [evidence IEA]; go_component: cytoplasm [goid 0005737] [evidence TAS] [pmid 9703499]; go_function: single-stranded RNA binding [goid 0003727] [evidence TAS] [pmid 9703499]; go_function: DNA binding [goid 0003677] [evidence IEA]; go_process: mRNA catabolism [goid 0006402] [evidence TAS] [pmid 9703499]	1761	477.7	531.2	890.1	1706.9	477.9	1494	2121.3	800.4	1406.9	1830.9	1254.4	680.3	569.8	3476.6	301.6	275.9	2604.2	3717.4	425.3
490	GI_31317237-S	NM_012083.2	FRAT2	Homo sapiens frequently rearranged in advanced T-cell lymphomas 2 (FRAT2), mRNA.	go_component: cellular_component unknown [goid 0008372] [evidence ND]; go_function: molecular_function unknown [goid 0005554] [evidence ND]; go_process: development [goid 0007275] [evidence NAS]; go_process: cell proliferation [goid 0008283] [evidence NAS]	1513.1	294.7	364.2	1133.6	1840.5	715.3	1170.5	2784	907.4	1104.9	2103.4	1245.1	641.5	583.7	3412.8	251.2	254.4	2164.3	3896.5	416.2
491	GI_20070184-S	NM_005151.2	USP14	Homo sapiens ubiquitin specific protease 14 (tRNA-guanine transglycosylase) (USP14), mRNA.	go_function: ubiquitin-specific protease activity [goid 0004843] [evidence TAS] [pmid 8579355]; go_function: tRNA guanylyltransferase activity [goid 0008193] [evidence TAS] [pmid 8579355]; go_function: cysteine-type endopeptidase activity [goid 0004197] [evidence TAS] [pmid 9827704]; go_function: ubiquitin thiolesterase activity [goid 0004221] [evidence IEA]; go_function: hydrolase activity [goid…	958.3	221.2	250.6	945.2	1202.6	416.4	823.2	2374.6	1067.6	1635.8	1333.1	1412.6	224.7	131.3	8348.2	96.7	86	2408.1	2313.4	540.8
492	GI_32813442-A	NM_182642.1	CTDSP1	Homo sapiens CTD (carboxy-terminal domain, RNA polymerase II, polypeptide A) small phosphatase 1 (CTDSP1), mRNA.		1609.2	325.4	405.1	1352.3	1411.9	1110.9	1185.8	658.5	1254.4	841.1	1215.6	992	309.4	125.1	5838.9	259.6	222	3277.5	3548.6	766.9
493	GI_20428651-S	NM_005356.2	LCK	Homo sapiens lymphocyte-specific protein tyrosine kinase (LCK), mRNA.	go_component: membrane fraction [goid 0005624] [evidence NR]; go_function: protein-tyrosine kinase activity [goid 0004713] [evidence TAS] [pmid 8139546]; go_function: ATP binding [goid 0005524] [evidence IEA]; go_function: transferase activity [goid 0016740] [evidence IEA]; go_process: RAS protein signal transduction [goid 0007265] [evidence TAS] [pmid 10799545]; go_process: protein amino acid ph…	1068.5	542.3	545.9	1483.2	1346.9	712.7	936.4	1955.2	1069.3	1807.2	1659.9	1232.7	539.9	565.1	4495.2	318.3	304.1	3459.8	2286.3	351.9
494	GI_6006024-S	NM_002436.2	MPP1	Homo sapiens membrane protein, palmitoylated 1, 55kDa (MPP1), mRNA.	go_component: membrane [goid 0016020] [evidence NR]; go_component: membrane fraction [goid 0005624] [evidence TAS] [pmid 1713685]; go_component: integral to plasma membrane [goid 0005887] [evidence TAS] [pmid 1713685]; go_function: guanylate kinase activity [goid 0004385] [evidence TAS] [pmid 1310897]; go_function: protein binding [goid 0005515] [evidence IEA]; go_process: signal transduction [go…	1126	710.3	800.3	775.1	1189.4	665.1	1004.7	780.2	953.7	698.6	1540	832.4	1141.4	1112.1	3107.7	645	626.7	4490.8	2534.8	1891.2
495	GI_6806912-S	NM_006869.1	CENTA1	Homo sapiens centaurin, alpha 1 (CENTA1), mRNA.	go_component: nucleus [goid 0005634] [evidence IEA]; go_component: cytoplasm [goid 0005737] [evidence TAS] [pmid 10333475]; go_component: plasma membrane [goid 0005886] [evidence TAS] [pmid 10333475]; go_function: phospholipid binding [goid 0005543] [evidence TAS] [pmid 10333475]; go_function: ARF GTPase activator activity [goid 0008060] [evidence TAS] [pmid 10333475]; go_function: DNA binding [g…	1723.3	300.7	327.8	1476	1682.5	785.7	1334.4	1884.5	900.6	1617	1640.1	1544.8	415.3	408.2	4527.9	162.1	180.5	2358.6	2745.1	439.4
496	GI_31982918-S	NM_025189.2	ZNF430	Homo sapiens zinc finger protein 430 (ZNF430), mRNA.	go_component: intracellular [goid 0005622] [evidence IEA]; go_component: nucleus [goid 0005634] [evidence IEA]; go_function: nucleic acid binding [goid 0003676] [evidence IEA]; go_function: DNA binding [goid 0003677] [evidence IEA]; go_process: regulation of transcription, DNA-dependent [goid 0006355] [evidence IEA]	1104.5	337.5	380	835.4	1213.8	473.8	811	1780	1133.9	1440.7	1719	1317.9	380.1	333.7	5109.1	213.8	218.1	3982.6	3105.6	556.9
497	GI_14165460-I	NM_031968.1	NARF	Homo sapiens nuclear prelamin A recognition factor (NARF), transcript variant 2, mRNA.	go_component: nuclear lamina [goid 0005652] [evidence E] [pmid 10514485]; go_function: lamin binding [goid 0005521] [evidence E] [pmid 10514485]	1186.9	261.8	300	1003.8	1130.4	502.9	827.3	2489.4	970.5	1840.6	1139.9	1386.1	181.8	142.1	8179.2	83.3	76.7	2153.1	2053.3	459.6
498	GI_23680884-S	NM_017861.1	FLJ20522	Homo sapiens hypothetical protein FLJ20522 (FLJ20522), mRNA.		1186.4	256.4	289.5	1055.3	1328.8	516.9	903.6	2419	969.3	1478.2	1160.2	1442.8	182.6	123.3	7471.2	86.4	82.5	2446.6	2416.8	545.6
499	GI_13787192-S	NM_000478.2	ALPL	Homo sapiens alkaline phosphatase, liver/bone/kidney (ALPL), mRNA.	go_component: integral to membrane [goid 0016021] [evidence IEA]; go_function: magnesium ion binding [goid 0000287] [evidence IEA]; go_function: alkaline phosphatase activity [goid 0004035] [evidence IEA]; go_function: hydrolase activity [goid 0016787] [evidence IEA]; go_process: skeletal development [goid 0001501] [evidence TAS] [pmid 9781036]; go_process: metabolism [goid 0008152] [evidence IEA…	1317.7	659.2	682.4	460.1	2490.9	730.3	984.7	1351	638.2	901.6	2010.1	1197.3	603.4	597.8	4437.7	177.1	197.3	2545.1	3789.3	473.8
500	GI_19924146-A	NM_006053.2	TCIRG1	Homo sapiens T-cell, immune regulator 1, ATPase, H+ transporting, lysosomal V0 protein a isoform 3 (TCIRG1), transcript variant 2, mRNA.	go_component: integral to plasma membrane [goid 0005887] [evidence TAS] [pmid 10329006]; go_component: plasma membrane [goid 0005886] [evidence E] [pmid 9806637]; go_function: transporter activity [goid 0005215] [evidence TAS] [pmid 8579597]; go_function: hydrogen ion transporter activity [goid 0015078] [evidence IEA]; go_function: hydrogen-transporting two-sector ATPase activity [goid 0003936] […	1678.5	292.9	343.9	759.2	1327	376.2	1387.7	2140.5	1227.5	1793.9	1424	1282.2	822.4	769.3	3601.8	380.2	356.8	2081.4	3596	461.2
501	GI_42662435-S	XM_371459.2	MGC1842	Homo sapiens hypothetical protein MGC1842 (MGC1842), mRNA.		1393	681.5	791.8	918.5	1131	783.8	1186.6	696.8	960.9	904.7	816.9	514.4	659.2	638.3	4951.4	549.6	508.2	3737.2	3307.3	929
502	GI_37547284-S	XM_353192.1	LOC374941	Homo sapiens hypothetical gene supported by BC035379; BC042129 (LOC374941), mRNA.		421.5	802.2	906.8	1607.6	2518	1734.3	342.9	247.7	1844.6	278.7	1950.5	232.6	178.1	166.7	1700.2	513.2	482.5	4678.4	4405.6	1039.1
503	GI_34577104-A	NM_183425.1	RNPC1	Homo sapiens RNA-binding region (RNP1, RRM) containing 1 (RNPC1), transcript variant 2, mRNA.	go_function: RNA binding [goid 0003723] [evidence IEA]	1165.9	986	1134.7	1934.7	1221.6	1449.9	994.6	534	710.1	746.5	556.2	448.4	826	710.9	3363.9	449.7	403	4457.2	2575.3	1347.6
504	GI_42657549-S	XM_371857.2	LOC389445	Homo sapiens similar to 60S ribosomal protein L21 (LOC389445), mRNA.		991.6	978.2	1069.4	1183.5	1459.3	882.9	863.5	2273.2	1908.8	1628.4	717.4	470.3	604.3	592	3526.8	351.9	336	3270.7	2183.3	674.9
505	GI_31543214-S	NM_005953.2	MT2A	Homo sapiens metallothionein 2A (MT2A), mRNA.	go_function: heavy metal binding [goid 0005505] [evidence NR]; go_function: metal ion binding [goid 0046872] [evidence IEA]; go_function: copper ion binding [goid 0005507] [evidence NR]; go_process: copper ion homeostasis [goid 0006878] [evidence TAS] [pmid 6719135]	1061.5	807.5	901.5	936.6	1617.4	636	940.8	1471	1183.9	1249.5	1539.5	1266.5	900.5	870.3	4466.8	340.9	358.3	2389.4	2538.3	470.9
506	GI_4505328-S	NM_003827.1	NAPA	Homo sapiens N-ethylmaleimide-sensitive factor attachment protein, alpha (NAPA), mRNA.	go_component: inter-Golgi transport vesicle [goid 0005807] [evidence P] [pmid 8455721]; go_component: Golgi apparatus [goid 0005794] [evidence IEA]; go_component: endoplasmic reticulum [goid 0005783] [evidence IEA]; go_function: intracellular transporter activity [goid 0005478] [evidence IEA]; go_function: protein transporter activity [goid 0008565] [evidence IEA]; go_process: intra-Golgi transpo…	1402.2	293	326.5	856.5	1735.4	478.7	1234.8	1446.6	1205.9	1581	1472.1	1596.5	597.3	541.1	4079.4	333.6	327.7	2856.7	2641.5	874.4
507	GI_20149527-S	NM_003978.2	PSTPIP1	Homo sapiens proline-serine-threonine phosphatase interacting protein 1 (PSTPIP1), mRNA.	go_component: peripheral plasma membrane protein [goid 0000157] [evidence E] [pmid 9857189]; go_process: response to pest/pathogen/parasite [goid 0009613] [evidence TAS] [pmid 9857189]; go_process: cell adhesion [goid 0007155] [evidence TAS] [pmid 9857189]; go_process: signal transduction [goid 0007165] [evidence TAS] [pmid 9857189]	1460.5	333.3	416.6	1605.5	1524.7	596.7	1059	2056.5	1248.6	1693	1161.6	1216	428.6	430	3992.1	191.4	199.8	2728.5	3116.8	354
508	GI_22219459-A	NM_004379.2	CREB1	Homo sapiens cAMP responsive element binding protein 1 (CREB1), transcript variant A, mRNA.	go_component: nucleus [goid 0005634] [evidence TAS] [pmid 10909971]; go_function: transcription cofactor activity [goid 0003712] [evidence TAS] [pmid 8552098]; go_function: transcription factor activity [goid 0003700] [evidence TAS] [pmid 10909971]; go_function: protein binding [goid 0005515] [evidence IEA]; go_function: translation regulator activity [goid 0045182] [evidence IEA]; go_process: tr…	966.3	444.3	578.4	841	1239.7	512.6	688.8	1674.4	1095.5	1547.5	1596.2	1291.4	410.4	436.4	4620.9	200.4	212.7	3852	3081.4	491.4
509	GI_23312372-S	NM_001065.2	TNFRSF1A	Homo sapiens tumor necrosis factor receptor superfamily, member 1A (TNFRSF1A), mRNA.	go_component: extracellular [goid 0005576] [evidence TAS] [pmid 1698610]; go_component: integral to plasma membrane [goid 0005887] [evidence TAS] [pmid 1698610]; go_function: tumor necrosis factor receptor activity [goid 0005031] [evidence E] [pmid 2158863]; go_function: tumor necrosis factor receptor cell differentiation, type I [goid 0005032] [evidence TAS] [pmid 1698610]; go_function: receptor…	1775	387.5	443.8	1273.1	1504.6	846.6	1532.6	2337.2	957.4	1515.5	1445.5	1542.8	407.7	381	4000.8	213.4	200.3	1916.8	2455.5	544.2
510	GI_4502630-S	NM_001295.1	CCR1	Homo sapiens chemokine (C-C motif) receptor 1 (CCR1), mRNA.	go_component: integral to plasma membrane [goid 0005887] [evidence TAS] [pmid 7505609]; go_component: plasma membrane [goid 0005886] [evidence E] [pmid 7505609]; go_function: chemokine receptor activity [goid 0004950] [evidence E]; go_function: C-C chemokine receptor activity [goid 0016493] [evidence IEA]; go_function: rhodopsin-like receptor activity [goid 0001584] [evidence IEA]; go_process: cy…	1117.1	259	289.4	595.5	1228.3	356.6	838.6	2734.7	570.9	1614.9	1447.1	1431.1	242.7	229.7	3748.7	246	243	1611.6	6289.7	482.7
511	GI_15812219-S	NM_000993.2	RPL31	Homo sapiens ribosomal protein L31 (RPL31), mRNA.	go_component: cytosolic large ribosomal subunit (sensu Eukarya) [goid 0005842] [evidence TAS] [pmid 2780320]; go_component: ribosome [goid 0005840] [evidence IEA]; go_component: intracellular [goid 0005622] [evidence IEA]; go_function: structural protein of ribosome [goid 0003735] [evidence P] [pmid 2780320]; go_function: RNA binding [goid 0003723] [evidence TAS] [pmid 2780320]; go_function: stru…	685.6	586.2	625.5	1431	1118	707.2	641.6	5341.4	1621	1628.9	1082.1	418.7	801.7	669	1344.1	313.8	294.3	3335.3	2570.1	319.6
512	GI_42655923-S	XM_375850.1	LOC400810	Homo sapiens similar to Ferritin heavy chain (Ferritin H subunit) (LOC400810), mRNA.		909.8	124.7	145.2	714.6	1477.1	453.4	790.2	3124	1150	1428.1	1925.9	1963.7	214	81.4	5960.1	72.1	60.4	1850	2120.8	947.9
513	GI_34222266-S	NM_178509.3	STXBP4	Homo sapiens syntaxin binding protein 4 (STXBP4), mRNA.		1100	220.5	260	815.4	1190.3	402.8	964.2	2010.9	1186.2	1538.3	1063.8	1403.1	244.7	159.7	7083.5	96.6	72.2	2547	2478.6	579.3
514	GI_8923109-S	NM_017668.1	NDE1	Homo sapiens nudE nuclear distribution gene E homolog 1 (A. nidulans) (NDE1), mRNA.		1720.6	387	429.8	1297.9	1421.3	684.3	1705	1969.8	850	1183.1	1879.3	1303.8	475.4	445.4	3983.9	306.3	292	2182.7	2298.3	546.6
515	GI_4506760-S	NM_002966.1	S100A10	Homo sapiens S100 calcium binding protein A10 (annexin II ligand, calpactin I, light polypeptide (p11)) (S100A10), mRNA.	go_function: receptor binding [goid 0005102] [evidence NR] [pmid 1831433]; go_function: calcium ion binding [goid 0005509] [evidence NR]; go_process: signal transduction [goid 0007165] [evidence NR] [pmid 1831433]	1322.1	533.8	600.1	1085.4	1213.6	638.5	1284.2	1133.6	886.8	1607.6	1122.8	1098.8	621.1	584.9	3072.2	213.9	203.1	3345.2	4412.4	363.1
516	GI_31657130-S	NM_002638.2	PI3	Homo sapiens protease inhibitor 3, skin-derived (SKALP) (PI3), mRNA.	go_component: extracellular matrix [goid 0005578] [evidence TAS] [pmid 8476637]; go_function: protein binding [goid 0005515] [evidence TAS] [pmid 7685029]; go_function: serine protease inhibitor activity [goid 0004867] [evidence TAS] [pmid 8476637]; go_function: endopeptidase inhibitor activity [goid 0004866] [evidence E]; go_process: copulation [goid 0007620] [evidence IEA]	950.9	414.6	498.1	530.7	1309.8	506.8	877.5	2204.2	1574.3	2145.9	1318.3	1627.2	838.9	791.2	5432.9	123	115.1	1710.7	1811.9	518.2
517	GI_4506788-S	NM_002970.1	SAT	Homo sapiens spermidine/spermine N1-acetyltransferase (SAT), mRNA.	go_function: diamine N-acetyltransferase activity [goid 0004145] [evidence TAS] [pmid 1985966]; go_function: acyltransferase activity [goid 0008415] [evidence IEA]; go_function: transferase activity [goid 0016740] [evidence IEA]	1277.9	415.1	509.2	1009.7	1528.9	527.9	1126.1	2637.3	1057	1439	1361.9	1090	732.1	670.4	2615.6	246.7	214.8	2660.6	3740.3	438.7
518	GI_39725631-I	NM_153649.2	TPM3	Homo sapiens tropomyosin 3 (TPM3), mRNA.		1068.8	516.3	532.9	1050.6	1376.4	646.6	1002.1	1943	899.8	1211.9	1336.2	953	791.5	704.4	3059.8	326.6	325.7	3630.9	3500	347.3
519	GI_6006015-S	NM_002305.2	LGALS1	Homo sapiens lectin, galactoside-binding, soluble, 1 (galectin 1) (LGALS1), mRNA.	go_function: galactose binding lectin [goid 0005531] [evidence IEA]; go_function: lectin [goid 0005530] [evidence IEA]; go_function: sugar binding [goid 0005529] [evidence IEA]; go_function: galactose binding [goid 0005534] [evidence IEA]; go_process: apoptosis [goid 0006915] [evidence TAS] [pmid 1713454]; go_process: heterophilic cell adhesion [goid 0007157] [evidence IEA]	1474	397.5	472.2	1220.3	1108.4	657.7	1252.7	1345.7	1020.3	1854.2	1358.6	1173.4	636.3	604.8	3111.5	234.3	242.7	3100	3424.6	377.6
520	GI_20428653-S	NM_001743.3	CALM2	Homo sapiens calmodulin 2 (phosphorylase kinase, delta) (CALM2), mRNA.	go_component: cytoplasm [goid 0005737] [evidence TAS] [pmid 10899953]; go_component: plasma membrane [goid 0005886] [evidence TAS] [pmid 10899953]; go_function: calcium ion binding [goid 0005509] [evidence TAS] [pmid 9681195]; go_function: protein binding [goid 0005515] [evidence TAS] [pmid 9923700]; go_process: G-protein coupled receptor protein signaling pathway [goid 0007186] [evidence TAS] [p…	1377.6	711.7	826.7	1051.8	1338.6	750.1	1248.8	1907	1147.3	1494.9	1760.2	883.9	772.7	599	2726.9	264.7	241.5	2932.4	2567.3	373.2
521	GI_10835048-S	NM_001664.1	ARHA	Homo sapiens ras homolog gene family, member A (ARHA), mRNA.	go_component: cytoskeleton [goid 0005856] [evidence IEA]; go_component: membrane [goid 0016020] [evidence IEA]; go_function: Rho small monomeric GTPase activity [goid 0003931] [evidence TAS] [pmid 10436159]; go_function: GTP binding [goid 0005525] [evidence IEA]; go_process: Rho protein signal transduction [goid 0007266] [evidence TAS] [pmid 10436159]; go_process: actin cytoskeleton reorganizatio…	1205.6	551.4	654.1	953.8	1318	573.4	1148.9	1785	851.8	1366	1594.4	1084.9	739.3	684.3	3701.5	316.4	296.3	2579.2	3039.3	411.5
522	GI_7706556-A	NM_016520.1	C9orf78	Homo sapiens chromosome 9 open reading frame 78 (C9orf78), mRNA.		1100.5	1223.9	1316.6	977.5	1123.6	456.2	931.2	667.6	841.7	714.3	1456.9	680.1	1017.1	854.5	2236.9	394.3	343.6	5072.6	1860.6	1576.8
523	GI_34147607-S	NM_015953.3	NOSIP	Homo sapiens nitric oxide synthase interacting protein (NOSIP), mRNA.		1214.7	303.6	337.8	971.7	1461.1	593	970.1	1426.1	1530.7	1401.5	2298.2	1380.8	503.8	456.1	4569	322	301.4	1821.5	2571.6	355.3
524	GI_4757859-S	NM_004331.1	BNIP3L	Homo sapiens BCL2/adenovirus E1B 19kDa interacting protein 3-like (BNIP3L), mRNA.	go_component: integral to membrane [goid 0016021] [evidence IEA]; go_component: mitochondrion [goid 0005739] [evidence TAS] [pmid 9973195]; go_function: tumor suppressor [goid 0008181] [evidence TAS] [pmid 9523198]; go_process: negative regulation of survival gene products [goid 0008634] [evidence TAS] [pmid 9973195]; go_process: induction of apoptosis [goid 0006917] [evidence TAS] [pmid 9973195]…	855.1	797.8	933	760.6	993.4	582.1	849.1	1626.2	1271.2	1482	1028.9	819.6	735.6	702.9	2409.1	575.9	549	3446.7	3211.8	1087.6
525	GI_12621916-S	NM_005217.2	DEFA3	Homo sapiens defensin, alpha 3, neutrophil-specific (DEFA3), mRNA.	go_component: extracellular [goid 0005576] [evidence IEA]; go_function: antimicrobial peptide activity [goid 0003795] [evidence NR]; go_function: antifungal peptide activity [goid 0003799] [evidence IEA]; go_process: chemotaxis [goid 0006935] [evidence E]; go_process: immune response [goid 0006955] [evidence E]; go_process: xenobiotic metabolism [goid 0006805] [evidence IEA]; go_process: defense …	854.6	1174.7	1305.1	827.4	1245	1825.5	826	4732.3	4830.3	678.8	853.3	288.5	296.2	273.9	1177.4	55.5	57.7	2109.1	254.6	1046
526	GI_28558997-A	NM_175847.1	PTBP1	Homo sapiens polypyrimidine tract binding protein 1 (PTBP1), transcript variant 4, mRNA.	go_component: nucleoplasm [goid 0005654] [evidence TAS] [pmid 1641332]; go_component: nucleolus [goid 0005730] [evidence TAS]; go_function: poly-pyrimidine tract binding [goid 0008187] [evidence TAS] [pmid 1906036]; go_function: heterogeneous nuclear ribonucleoprotein [goid 0008436] [evidence TAS] [pmid 1641332]; go_function: RNA binding [goid 0003723] [evidence E] [pmid 1906036]; go_process: mRN…	1247.9	430.5	486.6	1121.3	1221.3	600.8	985.5	2046.2	949	1269.7	1219.1	837.9	596.2	600	3919.9	265.6	257.2	3315.2	2916.4	392.9
527	GI_4503516-S	NM_003755.1	EIF3S4	Homo sapiens eukaryotic translation initiation factor 3, subunit 4 delta, 44kDa (EIF3S4), mRNA.	go_function: translation factor activity, nucleic acid binding [goid 0008135] [evidence E] [pmid 9973622]; go_function: translation initiation factor activity [goid 0003743] [evidence IEA]; go_function: RNA binding [goid 0003723] [evidence IEA]; go_process: regulation of translational initiation [goid 0006446] [evidence TAS] [pmid 9973622]; go_process: protein biosynthesis [goid 0006412] [evidenc…	1351	285.1	371.9	1092.7	1193.7	514.4	1253.8	1342.6	1202.5	1464.7	1597.9	1086.8	479.4	425.6	4864.8	272.2	283.3	2652.2	2604.8	316.8
528	GI_45331210-S	NM_033206.1	FLJ00060	Homo sapiens hypothetical gene FLJ00060 (FLJ00060), mRNA.		969.5	239.2	266.5	642.4	1189.1	392	703.6	1560.4	1177.2	1550.3	1756.2	1354.2	303.9	246.7	4909.8	165.5	158.1	3308.5	3040.1	597.8
529	GI_32307179-S	NM_016139.2	CHCHD2	Homo sapiens coiled-coil-helix-coiled-coil-helix domain containing 2 (CHCHD2), mRNA.		1337.8	516.2	572.1	1054.7	1123.5	960.6	1081.6	2596.6	1164.6	1823.5	1176.7	1028.9	515.3	422.6	2722.2	234.1	208.1	2592.9	2780.4	485.3
530	GI_27436941-S	NM_002954.3	RPS27A	Homo sapiens ribosomal protein S27a (RPS27A), mRNA.	go_component: ribosome [goid 0005840] [evidence NAS]; go_component: intracellular [goid 0005622] [evidence IEA]; go_function: structural constituent of ribosome [goid 0003735] [evidence IEA]; go_function: protein degradation tagging activity [goid 0000211] [evidence NAS]; go_process: protein biosynthesis [goid 0006412] [evidence IEA]; go_process: biological_process unknown [goid 0000004] [evidenc…	1640.9	431.9	467.7	1117.8	1522.6	703.3	1292.7	1781.1	1623.1	1663.7	1140	1101.5	305.1	303.3	4247.9	229.6	216.5	2908	1303.8	374.3
531	GI_16950657-S	NM_001760.2	CCND3	Homo sapiens cyclin D3 (CCND3), mRNA.	go_component: nucleus [goid 0005634] [evidence NR]; go_function: cyclin-dependent protein kinase, intrinsic regulator activity [goid 0016538] [evidence IEA]; go_process: regulation of cell cycle [goid 0000074] [evidence TAS] [pmid 1386336]; go_process: cytokinesis [goid 0016288] [evidence IEA]; go_process: cytokinesis [goid 0000910] [evidence IEA]	1328.4	409	448	725.7	1134.4	483.7	1191.9	1200.3	1167.9	1342.7	2139.8	875	888.6	792.2	3655.8	459.8	394.1	2864	2541.9	293.6
532	GI_42658952-S	XM_379582.1	LOC286177	Homo sapiens hypothetical protein LOC286177 (LOC286177), mRNA.		938.7	118.3	147.1	906.9	1184.4	516	697.6	2610.3	990.2	1377.9	1215.8	1480.6	146	74.1	6893.6	70.9	63.1	2214.3	2192.2	496.7
533	GI_5453799-S	NM_006176.1	NRGN	Homo sapiens neurogranin (protein kinase C substrate, RC3) (NRGN), mRNA.	go_function: calmodulin binding [goid 0005516] [evidence TAS] [pmid 10075657]; go_process: signal transduction [goid 0007165] [evidence TAS] [pmid 10075657]; go_process: neurogenesis [goid 0007399] [evidence TAS] [pmid 10075657]	898.9	295.9	377.7	438.8	1517.2	432.9	732.3	596.8	1026.4	849.5	4260.2	1278	628.3	614.9	4245.8	482.4	505.7	1361.1	3176.2	449.3
534	GI_39812335-S	NM_004553.2	NDUFS6	Homo sapiens NADH dehydrogenase (ubiquinone) Fe-S protein 6, 13kDa (NADH-coenzyme Q reductase) (NDUFS6), mRNA.	go_component: NADH dehydrogenase complex (ubiquinone) (sensu Eukarya) [goid 0005748] [evidence TAS] [pmid 9647766]; go_component: mitochondrion [goid 0005739] [evidence IEA]; go_function: iron-sulfur electron transfer carrier [goid 0008042] [evidence TAS] [pmid 9647766]; go_function: NADH dehydrogenase (ubiquinone) activity [goid 0008137] [evidence TAS] [pmid 9647766]; go_function: NADH dehydroge…	1280.8	385.8	436.1	1287.8	1094.7	807	1082.7	1720.2	1040.9	1689.3	1232.4	1016.2	477.9	386.2	4278.1	200.5	226.4	2442.5	2707.9	363.3
535	GI_20070234-S	NM_006495.2	EVI2B	Homo sapiens ecotropic viral integration site 2B (EVI2B), mRNA.	go_component: integral to plasma membrane [goid 0005887] [evidence TAS] [pmid 1903357]; go_process: oncogenesis [goid 0007048] [evidence TAS] [pmid 1903357]; go_process: cell growth and/or maintenance [goid 0008151] [evidence IEA]	1320.8	661.7	720.3	1050.1	1433.1	596.8	1223.6	1858.8	919.9	1011.5	1603.9	876.2	613.7	593.4	2343.2	301.5	277.8	2765.3	3538	374.5
536	GI_32528298-S	NM_001167.2	BIRC4	Homo sapiens baculoviral IAP repeat-containing 4 (BIRC4), mRNA.	go_component: cytosol [goid 0005829] [evidence TAS] [pmid 8654366]; go_component: cytoplasm [goid 0005737] [evidence E] [pmid 8654366]; go_component: actin cytoskeleton [goid 0015629] [evidence IEA]; go_function: apoptosis inhibitor activity [goid 0008189] [evidence TAS] [pmid 9230442]; go_function: cysteine protease inhibitor activity [goid 0004869] [evidence IEA]; go_function: actin binding [go…	965.6	327.7	368.9	798.9	1110.9	487.8	784.1	1717.4	1074.9	1381	1633.8	1260.9	339.5	321.2	4942.5	183.4	190.1	2895.8	2786	500.7
537	GI_18641376-S	NM_002118.3	HLA-DMB	Homo sapiens major histocompatibility complex, class II, DM beta (HLA-DMB), mRNA.	go_component: integral to membrane [goid 0016021] [evidence IEA]; go_function: MHC-interacting protein [goid 0003822] [evidence TAS] [pmid 8139690]; go_function: chaperone activity [goid 0003754] [evidence NR]; go_function: MHC class II receptor activity [goid 0045012] [evidence IEA]; go_process: perception of pest/pathogen/parasite [goid 0009596] [evidence TAS] [pmid 8139690]; go_process: immune…	1177.7	524.3	553.9	1405.1	892.9	720.6	1092.2	2184.8	939.5	1475.9	1071.2	831.6	546.4	523.4	3595.8	282.7	253.2	2318.1	3358.1	273.1
538	GI_38201711-A	NM_030881.2	DDX17	Homo sapiens DEAD (Asp-Glu-Ala-Asp) box polypeptide 17 (DDX17), transcript variant 2, mRNA.	go_component: nucleus [goid 0005634] [evidence E] [pmid 8871553]; go_function: RNA dependent ATPase activity [goid 0008186] [evidence E] [pmid 8871553]; go_function: RNA helicase activity [goid 0003724] [evidence P] [pmid 8871553]; go_function: RNA binding [goid 0003723] [evidence P] [pmid 8871553]; go_process: RNA processing [goid 0006396] [evidence P] [pmid 8871553]	1057.8	648	764.9	977.2	898.7	457.2	969.2	2011.8	764.3	1137.6	1402.1	757.3	917.6	816.1	3165.6	419.3	377.1	3089.4	3037.8	322
539	GI_21536370-S	NM_007110.3	TEP1	Homo sapiens telomerase-associated protein 1 (TEP1), mRNA.	go_component: nucleus [goid 0005634] [evidence TAS] [pmid 9020079]; go_function: protein binding [goid 0005515] [evidence TAS] [pmid 9020079]; go_function: RNA binding [goid 0003723] [evidence TAS] [pmid 9020079]; go_process: DNA replication and chromosome cycle [goid 0000067] [evidence TAS] [pmid 9020079]	1089.5	258.9	311.7	789.6	1099.3	490.4	843.8	1551.7	1136.3	1576.8	1560.4	1321	306.8	296.7	5237.1	175.6	185.9	2602.6	2666.2	479
540	GI_11038652-S	NM_020980.2	AQP9	Homo sapiens aquaporin 9 (AQP9), mRNA.	go_component: integral to plasma membrane [goid 0005887] [evidence TAS] [pmid 9514918]; go_function: water channel activity [goid 0015250] [evidence TAS] [pmid 9514918]; go_function: transporter activity [goid 0005215] [evidence IEA]; go_process: water transport [goid 0006833] [evidence TAS] [pmid 9514918]; go_process: small molecule transport [goid 0006832] [evidence TAS] [pmid 9514918]; go_proc…	855.2	573.9	695.6	805.5	1592.2	731.8	902.1	2880.8	686.1	1085.2	1776.6	842.2	849	752.5	1423.4	256.9	271.5	2659.9	3924.3	363.5
541	GI_21361719-S	NM_018279.2	TMEM19	Homo sapiens transmembrane protein 19 (TMEM19), mRNA.		1262.2	116.7	150.8	770.3	1139.3	370.1	808.5	2097.6	1190.5	1849.1	1589.5	1628.2	217.6	172.5	5062.4	97.3	101.9	2344.2	2186.6	578.9
542	GI_4885656-S	NM_005431.1	XRCC2	Homo sapiens X-ray repair complementing defective repair in Chinese hamster cells 2 (XRCC2), mRNA.	go_component: nucleus [goid 0005634] [evidence IEA]; go_function: DNA dependent ATPase activity [goid 0008094] [evidence IEA]; go_function: damaged DNA binding [goid 0003684] [evidence IEA]; go_function: ATP binding [goid 0005524] [evidence IEA]; go_process: meiosis [goid 0007126] [evidence TAS] [pmid 9628903]; go_process: recombination [goid 0007145] [evidence E] [pmid 9628903]; go_process: DNA …	1044.2	195.2	233.4	705.9	989.2	346.4	672	1467.6	1220.2	1525.1	1609.1	1364.7	336.2	271.8	4563.2	167.1	167.5	3440.2	2827.3	555.3
543	GI_5031710-S	NM_005875.1	GC20	Homo sapiens translation factor sui1 homolog (GC20), mRNA.	go_function: translation initiation factor activity [goid 0003743] [evidence IEA]; go_process: regulation of translational initiation [goid 0006446] [evidence TAS] [pmid 7904817]; go_process: regulation of protein biosynthesis [goid 0006417] [evidence IEA]	887.9	1079.3	1291.2	637	749.5	556	811.3	963.7	681.5	714.7	1004	667.4	1032.2	926.8	2742.1	432	410.1	4544.7	2464.5	1029.2
544	GI_5031634-S	NM_005507.1	CFL1	Homo sapiens cofilin 1 (non-muscle) (CFL1), mRNA.	go_component: cytoskeleton [goid 0005856] [evidence IEA]; go_component: nucleus [goid 0005634] [evidence TAS] [pmid 8195165]; go_function: actin modulating activity [goid 0003790] [evidence NR]; go_function: actin binding [goid 0003779] [evidence NR]; go_process: Rho protein signal transduction [goid 0007266] [evidence TAS] [pmid 10436159]; go_process: actin cytoskeleton reorganization [goid 0007…	976	296.3	371	811.1	1115.4	471	878.6	1785.5	1022.4	1222.3	4313.8	1161.7	415.7	388.5	2345.3	250	228.5	2650	2340.8	447.2
545	GI_6995997-S	NM_001658.2	ARF1	Homo sapiens ADP-ribosylation factor 1 (ARF1), mRNA.	go_component: Golgi apparatus [goid 0005794] [evidence IEA]; go_component: plasma membrane [goid 0005886] [evidence TAS] [pmid 8529647]; go_function: GTPase activity [goid 0003924] [evidence P] [pmid 1577740]; go_function: receptor signaling protein activity [goid 0005057] [evidence TAS] [pmid 8529647]; go_function: small monomeric GTPase activity [goid 0003925] [evidence IEA]; go_function: prote…	1124.4	549.3	685.3	809	1073	495.2	977.8	1105.6	894	1093.4	1300.1	958.5	775.5	682.1	3565.1	326.8	322.7	3161.1	2937.4	608.6
546	GI_7705856-S	NM_016158.1	LOC51145	Homo sapiens erythrocyte transmembrane protein (LOC51145), mRNA.	go_component: integral to membrane [goid 0016021] [evidence IEA]; go_component: nucleus [goid 0005634] [evidence IEA]; go_function: DNA binding [goid 0003677] [evidence IEA]; go_process: regulation of transcription, DNA-dependent [goid 0006355] [evidence IEA]	962.9	182.2	227	970	1171.4	411.5	656.1	2125.9	1001.1	1762.3	1050.1	1333.5	184.9	143.8	6453.3	83.7	75.7	2106.2	1991.9	470.9
547	GI_28372538-S	NM_174921.1	LOC201895	Homo sapiens hypothetical protein LOC201895 (LOC201895), mRNA.		1180.2	169.4	199.9	989.2	1107.4	451.8	800.4	2262.4	863	1423.4	1189.3	1409.4	200.8	128.2	6413.1	85.4	84.7	2005.9	1922.2	465.6
548	GI_5453759-S	NM_006156.1	NEDD8	Homo sapiens neural precursor cell expressed, developmentally down-regulated 8 (NEDD8), mRNA.	go_component: nucleus [goid 0005634] [evidence TAS] [pmid 9353319]; go_function: ubiquitin conjugating enzyme activity [goid 0004840] [evidence NR]; go_process: proteolysis and peptidolysis [goid 0006508] [evidence TAS] [pmid 9694792]; go_process: ubiquitin-dependent protein catabolism [goid 0006511] [evidence TAS] [pmid 9353319]; go_process: embryogenesis and morphogenesis [goid 0007345] [eviden…	1231.8	505.3	585.3	944.4	1338.2	727.4	990.3	958.6	1089.8	1425.2	1193.1	1101.3	682	639.9	3183.4	324	297.5	2879.3	2806.1	414.8
549	GI_22507396-S	NM_002473.2	MYH9	Homo sapiens myosin, heavy polypeptide 9, non-muscle (MYH9), mRNA.	go_component: non-muscle myosin [goid 0005860] [evidence TAS] [pmid 1967836]; go_component: kinesin complex [goid 0005871] [evidence IEA]; go_component: myosin [goid 0016459] [evidence IEA]; go_function: adenosinetriphosphatase activity [goid 0004002] [evidence NR] [pmid 1967836]; go_function: motor activity [goid 0003774] [evidence NR]; go_function: actin binding [goid 0003779] [evidence IEA]; g…	1177.9	448.6	534.3	809.1	1422.1	459.3	1071	1319.1	731.3	1045.8	1875	856.1	653.3	660.8	3715.2	350.4	334.3	3090.9	2436.4	321.8
550	GI_17318568-S	NM_006121.2	KRT1	Homo sapiens keratin 1 (epidermolytic hyperkeratosis) (KRT1), mRNA.	go_component: intermediate filament [goid 0005882] [evidence TAS] [pmid 1380725]; go_component: cytoskeleton [goid 0005856] [evidence TAS]; go_component: kinesin complex [goid 0005871] [evidence IEA]; go_function: structural constituent of cytoskeleton [goid 0005200] [evidence TAS] [pmid 1380725]; go_process: epidermal differentiation [goid 0008544] [evidence TAS] [pmid 1380725]	927.8	876.5	1001.9	307.6	900.3	513.3	803.6	168.8	560.3	333.5	727	423	1004.7	918.5	3587.6	409.8	419.1	5924.6	1251.1	1976.9
551	GI_33186900-S	NM_182705.1	MGC45871	Homo sapiens hypothetical protein MGC45871 (MGC45871), mRNA.		1290.7	150.5	162.4	888.5	918	494.4	1191.4	2950.9	1340.3	3022.2	1629.6	1078.5	88.2	94.2	4432.4	43.4	45.3	1352.1	1261.9	459.7
552	GI_24797066-S	NM_002116.4	HLA-A	Homo sapiens major histocompatibility complex, class I, A (HLA-A), mRNA.		2259.3	613.6	741.3	2141.4	2594	415.3	1606.1	4408.7	633.4	1574.8	265.1	1802	206	148.1	231.2	419.6	404.4	181.1	1365.2	723.4
553	GI_7382494-A	NM_000631.2	NCF4	Homo sapiens neutrophil cytosolic factor 4, 40kDa (NCF4), transcript variant 1, mRNA.	go_component: cytosol [goid 0005829] [evidence TAS] [pmid 8839867]; go_function: electron transporter activity [goid 0005489] [evidence NR]; go_process: defense response [goid 0006952] [evidence TAS] [pmid 8839867]; go_process: electron transport [goid 0006118] [evidence IEA]; go_process: intracellular signaling cascade [goid 0007242] [evidence IEA]	1194.7	298.2	316.5	820.3	1502.1	525.4	999.7	2025.3	910.6	1182.8	2251.2	1061.4	684.2	579.3	3361.8	266.4	235.2	1792.1	2308.8	391.9
554	GI_4507170-S	NM_003118.1	SPARC	Homo sapiens secreted protein, acidic, cysteine-rich (osteonectin) (SPARC), mRNA.	go_component: extracellular matrix [goid 0005578] [evidence E]; go_component: basement membrane [goid 0005604] [evidence IEA]; go_function: collagen binding [goid 0005518] [evidence TAS] [pmid 7034958]; go_function: calcium ion binding [goid 0005509] [evidence TAS] [pmid 7034958]; go_process: ossification [goid 0001503] [evidence TAS] [pmid 7034958]	741.7	643.3	699.4	515	1524	665.8	642.5	660	1019.3	686.5	1698.8	1130.4	709.1	625.4	3355.4	504.2	486.3	1649.5	4072.1	616.1
555	GI_21314616-S	NM_000442.2	PECAM1	Homo sapiens platelet/endothelial cell adhesion molecule (CD31 antigen) (PECAM1), mRNA.	go_component: proteoglycan integral to plasma membrane [goid 0005888] [evidence TAS] [pmid 1690453]; go_component: intercellular junction [goid 0005911] [evidence NR]; go_component: plasma membrane [goid 0005886] [evidence TAS] [pmid 1690453]; go_component: integral to membrane [goid 0016021] [evidence IEA]; go_function: cell adhesion molecule activity [goid 0005194] [evidence IEA] [pmid 7994021]…	1535.8	294	362.4	822.1	1817.5	512.5	1211.3	2255	983.7	1085.6	1599.6	1124.5	398.2	375.9	2901.7	190.7	201.9	1897.5	2546.3	491.3
556	GI_22027640-S	NM_002107.2	H3F3A	Homo sapiens H3 histone, family 3A (H3F3A), mRNA.		1209.7	410.4	446	1062.4	1460.3	1316.9	1096.4	2145.2	1025.9	1340.8	1763.8	1399.5	534.1	599.2	2373.9	248	244.3	1410	1973.8	470.8
557	GI_4506030-S	NM_000310.1	PPT1	Homo sapiens palmitoyl-protein thioesterase 1 (ceroid-lipofuscinosis, neuronal 1, infantile) (PPT1), mRNA.	go_component: lysosome [goid 0005764] [evidence IEA]; go_function: palmitoyl-(protein) hydrolase activity [goid 0008474] [evidence IEA]; go_function: hydrolase activity [goid 0016787] [evidence IEA]; go_process: neurogenesis [goid 0007399] [evidence TAS] [pmid 7637805]; go_process: vision [goid 0007601] [evidence IEA]; go_process: protein modification [goid 0006464] [evidence IEA]	1244.2	462.3	550.4	1322.4	933.2	599.3	1058.5	2112.4	1006.7	1391.2	2005.5	1258.8	399.7	248.6	2607.3	227	162.8	2043.5	2465.2	420.4
558	GI_4758439-S	NM_004877.1	GMFG	Homo sapiens glia maturation factor, gamma (GMFG), mRNA.	go_component: intracellular [goid 0005622] [evidence IEA]; go_function: enzyme activator activity [goid 0008047] [evidence TAS] [pmid 8798479]; go_function: protein kinase inhibitor activity [goid 0004860] [evidence TAS] [pmid 8639570]; go_function: actin binding [goid 0003779] [evidence IEA]; go_function: growth factor activity [goid 0008083] [evidence IEA]; go_process: protein amino acid phosph…	1157.4	303.1	338.8	1247.8	1463.5	774.5	905.3	2781.1	1489	1699.5	1288.6	785.2	503.1	452	2677.9	202.5	177.9	1810.3	2122.7	338.8
559	GI_5454087-S	NM_006401.1	ANP32B	Homo sapiens acidic (leucine-rich) nuclear phosphoprotein 32 family, member B (ANP32B), mRNA.	go_process: oncogenesis [goid 0007048] [evidence TAS] [pmid 9473664]	1026.9	555.7	673.8	881	1180.5	609.3	923.8	1212.4	893.9	994.5	1475.4	769.6	854	797.4	2806.4	401	354	3238.1	2140.9	703.6
560	GI_21536300-I	NM_139266.1	STAT1	Homo sapiens signal transducer and activator of transcription 1, 91kDa (STAT1), transcript variant beta, mRNA.	go_component: cytoplasm [goid 0005737] [evidence TAS]; go_component: nucleus [goid 0005634] [evidence TAS]; go_function: hematopoietin/interferon-class (D200-domain) cytokine receptor signal transducer activity [goid 0005062] [evidence TAS]; go_function: transcription activating factor [goid 0003710] [evidence E]; go_function: DNA binding [goid 0003677] [evidence E]; go_function: transcription fa…	778.7	453.9	541.6	1062.7	1463.9	449.6	707.2	2538.1	769.5	1223.2	1389	1039.9	870.3	747.6	3808.9	360.3	352.2	1366.7	2155.9	288.8
561	GI_4507908-S	NM_000377.1	WAS	Homo sapiens Wiskott-Aldrich syndrome (eczema-thrombocytopenia) (WAS), mRNA.	go_component: actin cytoskeleton [goid 0015629] [evidence TAS] [pmid 8625410]; go_function: small GTPase regulatory/interacting protein activity [goid 0005083] [evidence TAS] [pmid 8625410]; go_process: actin polymerization and/or depolymerization [goid 0008154] [evidence TAS] [pmid 8625410]; go_process: epidermal differentiation [goid 0008544] [evidence TAS] [pmid 8069912]; go_process: blood coa…	1194.8	337.4	375.7	670	1319	395.8	1058	1472.9	771.6	1142.6	2221.7	937.9	666.1	681.1	4717.3	326.2	315.1	1531	1942.8	268.9
562	GI_4885234-S	NM_005248.1	FGR	Homo sapiens Gardner-Rasheed feline sarcoma viral (v-fgr) oncogene homolog (FGR), mRNA.	go_function: protein-tyrosine kinase activity [goid 0004713] [evidence TAS] [pmid 3003578]; go_function: ATP binding [goid 0005524] [evidence IEA]; go_function: transferase activity [goid 0016740] [evidence IEA]; go_process: response to virus [goid 0009615] [evidence TAS] [pmid 3003578]; go_process: protein amino acid phosphorylation [goid 0006468] [evidence TAS] [pmid 2995972]; go_process: oncog…	1320.5	254.8	288	705.5	1384	284.7	965.4	2386.1	1203.7	1489.9	1852.4	1402.4	584	581.1	2770.8	214.3	189.9	1655.1	2286.6	446.8
563	GI_29029551-A	NM_177405.1	CECR1	Homo sapiens cat eye syndrome chromosome region, candidate 1 (CECR1), transcript variant 2, mRNA.	go_component: cellular_component unknown [goid 0008372] [evidence ND]; go_function: growth factor activity [goid 0008083] [evidence NAS] [pmid 10756095]; go_function: hydrolase activity [goid 0016787] [evidence IEA]; go_function: hydrolase activity, acting on carbon-nitrogen (but not peptide) bonds, in cyclic amidines [goid 0016814] [evidence IEA]; go_process: nucleotide metabolism [goid 0009117]…	1110.4	261.8	298.5	780.8	1126.4	273.9	1047.1	1195.2	862.5	1032.5	1482.2	890.4	544.6	519.4	4354.7	251	257.3	2212.7	3441	306
564	GI_37548551-S	XM_291533.2	LOC343363	Homo sapiens similar to Transcription factor BTF3 (RNA polymerase B transcription factor 3) (LOC343363), mRNA.		1109.4	286.2	348.2	945.5	1231.9	473.9	866.7	1268.1	1575	1136.5	1632.7	924.8	267.4	125.7	4028.9	166.4	117.6	3073.7	1670.8	976.8
565	GI_27764862-S	NM_001636.1	SLC25A6	Homo sapiens solute carrier family 25 (mitochondrial carrier; adenine nucleotide translocator), member 6 (SLC25A6), mRNA.	go_component: mitochondrial inner membrane presequence translocase complex [goid 0005744] [evidence TAS] [pmid 2541251]; go_component: mitochondrion [goid 0005739] [evidence IEA]; go_component: integral to membrane [goid 0016021] [evidence IEA]; go_function: adenine transporter activity [goid 0015207] [evidence P] [pmid 8490661]; go_function: binding [goid 0005488] [evidence IEA]; go_function: tr…	1130.4	423.6	447.4	1228.6	902.1	518.6	996.4	1275.1	1047.2	1252.4	1050.4	965	576.7	515.7	3080.1	242.3	246.2	2915.8	3076.9	330.5
566	GI_40255110-S	NM_152409.2	FLJ37562	Homo sapiens hypothetical protein FLJ37562 (FLJ37562), mRNA.	go_component: nucleus [goid 0005634] [evidence IEA]; go_function: DNA binding [goid 0003677] [evidence IEA]; go_process: regulation of transcription, DNA-dependent [goid 0006355] [evidence IEA]	1056.5	214.7	242.3	749.8	1060.9	382.3	769.2	1728.1	1117.8	1637.9	1489.6	1415.1	205.4	197.2	4517.8	109.6	121.7	2377.6	2199.7	557.2
567	GI_19882253-S	NM_000099.2	CST3	Homo sapiens cystatin C (amyloid angiopathy and cerebral hemorrhage) (CST3), mRNA.	go_function: cysteine protease inhibitor activity [goid 0004869] [evidence NR]	989	317.5	351.6	822.9	893.3	351.8	884.9	1396.6	1001.7	1151.8	2320.5	968.1	543.5	548.9	2897.7	278.5	303	2161.8	3623.7	298.9
568	GI_45267838-S	NM_017550.1	KIAA1193	Homo sapiens KIAA1193 (KIAA1193), mRNA.	go_component: nucleus [goid 0005634] [evidence IEA]; go_function: DNA binding [goid 0003677] [evidence IEA]	1260.8	248.5	291.5	1432.5	1686.1	1036.3	996.4	631.2	1237.5	725.5	1116.7	833	202.2	149.6	3833.3	178.4	157.1	2842.1	2419.1	790.7
569	GI_34222296-S	NM_004107.3	FCGRT	Homo sapiens Fc fragment of IgG, receptor, transporter, alpha (FCGRT), mRNA.	go_component: integral to membrane [goid 0016021] [evidence IEA]; go_function: receptor activity [goid 0004872] [evidence TAS] [pmid 7964511]; go_function: IgG binding [goid 0019864] [evidence IEA]; go_process: pregnancy [goid 0007565] [evidence TAS] [pmid 7964511]; go_process: immune response [goid 0006955] [evidence TAS] [pmid 7964511]	1417.7	317	351.8	959.3	1316.2	580.9	1253	1486.9	902.5	1201.1	1648.1	951.2	466.6	441.2	3586	238.7	221	1864.7	2488.5	362.6
570	GI_4758689-S	NM_004735.1	LRRFIP1	Homo sapiens leucine rich repeat (in FLII) interacting protein 1 (LRRFIP1), mRNA.	go_component: cytoskeleton [goid 0005856] [evidence P] [pmid 9671805]; go_component: cytoplasm [goid 0005737] [evidence E] [pmid 9671805]; go_component: nucleus [goid 0005634] [evidence P] [pmid 9705290]; go_function: double-stranded RNA binding [goid 0003725] [evidence E] [pmid 9671805]; go_function: RNA polymerase II transcription factor activity [goid 0003702] [evidence NR]; go_process: regula…	1065.8	231.5	348	713.8	983.9	407.9	778.8	1447.3	1167.6	1437.4	1328.2	1335.3	379.4	347.2	4338.2	159.6	176.1	2830.9	2067.3	505
571	GI_21614521-S	NM_012198.2	GCA	Homo sapiens grancalcin, EF-hand calcium binding protein (GCA), mRNA.	go_component: cytoplasm [goid 0005737] [evidence TAS] [pmid 1530588]; go_component: plasma membrane [goid 0005886] [evidence TAS] [pmid 1530588]; go_function: calcium ion binding [goid 0005509] [evidence TAS] [pmid 1530588]; go_process: membrane fusion [goid 0006944] [evidence TAS] [pmid 1530588]	1218.6	544.3	611.9	936.2	1187.6	742.1	979	2313.3	940.4	1074.6	1541.9	874.1	648.4	485	1268	170.1	185.2	2409.5	3535.6	347.6
572	GI_19923329-S	NM_005730.2	CTDSP2	Homo sapiens CTD (carboxy-terminal domain, RNA polymerase II, polypeptide A) small phosphatase 2 (CTDSP2), mRNA.	go_component: soluble fraction [goid 0005625] [evidence P] [pmid 9315096]; go_process: oncogenesis [goid 0007048] [evidence P] [pmid 9315096]	1153.2	442.6	529.1	1059.6	1174.1	547.6	933.5	1820.6	771.8	992.9	1398.3	843.8	549.1	504.8	3660.5	263	237	2327.1	2433.4	356.3
573	GI_16757969-I	NM_052966.1	C1orf24	Homo sapiens chromosome 1 open reading frame 24 (C1orf24), mRNA.	go_component: cellular_component unknown [goid 0008372] [evidence ND]; go_function: molecular_function unknown [goid 0005554] [evidence ND]; go_process: biological_process unknown [goid 0000004] [evidence ND]	1181.7	494.6	564.4	873.6	1489.5	609	1029.2	2303.5	708.4	975.6	1439.2	1132.7	728.4	465.8	2392.6	186.1	153.9	2384	2326.1	502.3
574	GI_37550045-S	XM_171060.4	MGC50836	Homo sapiens hypothetical protein MGC50836 (MGC50836), mRNA.		829.1	165.5	179	666.3	1035.8	328.3	652.9	1569.3	1022.4	1281.6	1098.2	1214.9	203.6	116.7	6518.8	100.2	82.7	2297.4	2107.8	407
575	GI_24469782-S	NM_020350.3	AGTRAP	Homo sapiens angiotensin II receptor-associated protein (AGTRAP), mRNA.		1379.8	320.5	357.4	849.8	1144.5	392	1122	1214.9	1232.8	1558.3	1287.5	1250.7	332.2	366.3	3308.6	180.1	181.4	1984.4	2938.9	374.9
576	GI_21536318-S	NM_002957.3	RXRA	Homo sapiens retinoid X receptor, alpha (RXRA), mRNA.	go_component: nucleus [goid 0005634] [evidence NR]; go_function: retinoid-X receptor activity [goid 0004886] [evidence E]; go_function: retinoic acid receptor activity [goid 0003708] [evidence NR]; go_function: DNA binding [goid 0003677] [evidence E]; go_function: transcription co-activator activity [goid 0003713] [evidence E]; go_process: vitamin metabolism [goid 0006766] [evidence P]; go_proces…	1476.8	302.7	339	955.6	1090.4	443.5	1107.6	1890.4	905.3	1105.3	1292.3	953.8	439.2	411.9	3921.7	200.6	200	1884.4	2361.4	438.5
577	GI_4505028-S	NM_000895.1	LTA4H	Homo sapiens leukotriene A4 hydrolase (LTA4H), mRNA.	go_function: leukotriene-A4 hydrolase activity [goid 0004463] [evidence E]; go_function: epoxide hydrolase activity [goid 0004301] [evidence NR]; go_function: peptidase activity [goid 0008233] [evidence E]; go_function: zinc ion binding [goid 0008270] [evidence TAS] [pmid 1881903]; go_function: metallopeptidase activity [goid 0008237] [evidence IEA]; go_function: membrane alanyl aminopeptidase ac…	1769.1	345.1	407.5	886.3	922.9	566.2	1444.8	1507.5	962.5	1022.7	1315.8	625.4	615	457.1	2887.7	239.6	226.7	2062.2	2983.9	458.3
578	GI_21361115-S	NM_004385.2	CSPG2	Homo sapiens chondroitin sulfate proteoglycan 2 (versican) (CSPG2), mRNA.	go_component: extracellular matrix [goid 0005578] [evidence TAS] [pmid 2583089]; go_function: glycosaminoglycan binding [goid 0005539] [evidence P]; go_function: proteoglycan [goid 0005203] [evidence NR]; go_function: chondroitin sulfate proteoglycan [goid 0005204] [evidence TAS] [pmid 2583089]; go_function: hyaluronic acid binding [goid 0005540] [evidence TAS] [pmid 2583089]; go_function: lectin…	1189.4	247.7	277.7	1044.9	1078.5	381.5	1052.9	2351	1296.7	1699.3	1713.5	942.5	453.8	288.3	1670.4	145.2	113.4	2202.5	3126.5	416.8
579	GI_41349679-S	NM_182495.3	FLJ25224	Homo sapiens hypothetical protein FLJ25224 (FLJ25224), mRNA.		929.2	163.3	215.3	1031	955.9	512.4	698.2	2412.5	803.4	1617.7	971.2	1120.3	141	120.9	5819.6	64.6	61.1	1769	1834.9	441.1
580	GI_24307952-S	NM_014301.1	NIFU	Homo sapiens nitrogen fixation cluster-like (NIFU), mRNA.		963.1	682.3	761.6	784.2	898.7	671.9	909.3	937.1	756.8	843.6	899.1	745.2	663.9	568	2991.5	344.8	313.4	3659.1	2651.3	615.9
581	GI_33942063-S	NM_006378.2	SEMA4D	Homo sapiens sema domain, immunoglobulin domain (Ig), transmembrane domain (TM) and short cytoplasmic domain, (semaphorin) 4D (SEMA4D), mRNA.	go_component: integral to membrane [goid 0016021] [evidence IEA]; go_function: receptor activity [goid 0004872] [evidence IEA]; go_process: anti-apoptosis [goid 0006916] [evidence TAS] [pmid 8876214]; go_process: cell adhesion [goid 0007155] [evidence TAS] [pmid 8876214]; go_process: immune response [goid 0006955] [evidence TAS] [pmid 8876214]; go_process: development [goid 0007275] [evidence IEA…	1158.5	343	403.9	967	1229.1	412.4	930.5	1817.3	815.6	1051.4	1972.5	941.3	399.3	288.2	3526.5	220.6	180.5	2466.1	2103.6	328.4
582	GI_30102943-S	NM_178230.1	COAS2	Homo sapiens cyclophilin-LC (COAS2), mRNA.	go_function: cyclophilin [goid 0004600] [evidence IEA]; go_function: isomerase activity [goid 0016853] [evidence IEA]; go_function: FK506-sensitive peptidyl-prolyl cis-trans isomerase [goid 0030051] [evidence IEA]; go_function: cyclophilin-type peptidyl-prolyl cis-trans isomerase activity [goid 0042027] [evidence IEA]; go_process: protein folding [goid 0006457] [evidence IEA]	949.2	391.5	462.9	772.8	1072.9	494.6	775.7	1850.6	962.6	1302	1272.9	745.4	509.5	380.6	4208.4	277.3	279.3	2881.4	1590	373.6
583	GI_42560226-I	NM_005349.2	RBPSUH	Homo sapiens recombining binding protein suppressor of hairless (Drosophila) (RBPSUH), transcript variant 1, mRNA.	go_component: nucleus [goid 0005634] [evidence NAS]; go_function: tyrosine-based site-specific recombinase activity [goid 0009037] [evidence P]; go_function: DNA binding [goid 0003677] [evidence NAS] [pmid 8406481]; go_function: recombinase activity [goid 0000150] [evidence NAS] [pmid 8406481]; go_function: RNA polymerase II transcription factor activity [goid 0003702] [evidence NR]; go_process: …	1217.3	305.7	367.8	902.3	1265.8	646.2	973.1	1800.4	776.3	1051.3	1320.3	1171.4	577	542.2	3273.2	230.5	239.8	2080.1	2430.5	377.5
584	GI_21361570-S	NM_001778.2	CD48	Homo sapiens CD48 antigen (B-cell membrane protein) (CD48), mRNA.	go_component: integral to plasma membrane [goid 0005887] [evidence TAS] [pmid 1693656]; go_component: plasma membrane [goid 0005886] [evidence P] [pmid 2828034]; go_function: lymphocyte antigen [goid 0005557] [evidence NR]; go_function: protein binding [goid 0005515] [evidence IPI] [pmid 12356317]; go_process: defense response [goid 0006952] [evidence TAS] [pmid 2828034]	840	469.9	571	1057.5	974.5	672.1	733.1	2084.4	1064.6	1435.8	1381.3	741.4	583	550.3	1953.9	236.8	229.7	2733.3	2854.1	363.9
585	GI_4503174-S	NM_003467.1	CXCR4	Homo sapiens chemokine (C-X-C motif) receptor 4 (CXCR4), mRNA.	go_component: cytoplasm [goid 0005737] [evidence TAS] [pmid 10415069]; go_component: integral to plasma membrane [goid 0005887] [evidence TAS] [pmid 10644702]; go_component: plasma membrane [goid 0005886] [evidence E]; go_function: chemokine receptor activity [goid 0004950] [evidence E]; go_function: coreceptor activity [goid 0015026] [evidence TAS] [pmid 10754293]; go_function: G-protein coupled…	1065.9	459.6	517.7	643.3	1099.4	416.6	955.5	1906.8	794.3	1008.9	1591.5	790.2	809.4	752.1	2850.6	378.6	354.4	2302.2	2538.6	270.2
586	GI_40795670-S	NM_032251.3	FLJ37970	Homo sapiens hypothetical protein FLJ37970 (FLJ37970), mRNA.		1223.8	297.4	328	1452.5	1402	555.7	931.6	1948.3	980	1210.8	1221.2	1018.2	358.8	325.6	3344	204.4	200.9	1999.7	2142	312.6
587	GI_16753226-S	NM_000970.2	RPL6	Homo sapiens ribosomal protein L6 (RPL6), mRNA.	go_component: cytosolic large ribosomal subunit (sensu Eukarya) [goid 0005842] [evidence TAS] [pmid 8479925]; go_component: ribosome [goid 0005840] [evidence IEA]; go_component: intracellular [goid 0005622] [evidence IEA]; go_function: structural protein of ribosome [goid 0003735] [evidence P] [pmid 8479925]; go_function: RNA binding [goid 0003723] [evidence TAS] [pmid 8479925]; go_function: DNA …	923.4	457.6	490	929.1	1041	526.8	827	1382.3	1270.9	1361.3	1450	789.7	591.7	525.7	2334.2	330.2	329.8	3481.4	2121.3	292.9
588	GI_6031197-S	NM_003006.2	SELPLG	Homo sapiens selectin P ligand (SELPLG), mRNA.	go_component: integral to membrane [goid 0016021] [evidence P] [pmid 7541799]; go_component: membrane fraction [goid 0005624] [evidence TAS] [pmid 7505206]; go_component: integral to plasma membrane [goid 0005887] [evidence TAS] [pmid 7505206]; go_function: bacterial binding [goid 0008367] [evidence TAS] [pmid 10834846]; go_function: receptor binding [goid 0005102] [evidence NR] [pmid 7505206]; g…	1259.7	230.8	235.4	768.2	902.7	363	891.9	1264	1040.3	1127.9	2494.3	1072	636.4	608.4	2912.4	316.1	313.2	2215.9	2448.4	322
589	GI_41327692-S	NM_018840.2	C20orf24	Homo sapiens chromosome 20 open reading frame 24 (C20orf24), transcript variant 1, mRNA.		1133.3	342.6	373.2	1000.8	1025.9	675.4	903.4	2232	954.2	1226.3	1576.9	1078.6	472.7	485.7	2383.7	231.5	248.6	1601.3	3034.6	390.4
590	GI_6912575-S	NM_012387.1	PADI4	Homo sapiens peptidyl arginine deiminase, type IV (PADI4), mRNA.	go_function: protein-arginine deiminase activity [goid 0004668] [evidence TAS] [pmid 10488123]; go_function: calcium ion binding [goid 0005509] [evidence IEA]; go_function: hydrolase activity [goid 0016787] [evidence IEA]; go_process: protein modification [goid 0006464] [evidence TAS] [pmid 10488123]	1079.8	271.5	296.3	931.3	1919.6	496.6	957.6	2730	965.6	865.4	2152.8	629.1	429.6	379.1	4217.3	189.6	176.5	1240.3	1146.1	285.5
591	GI_37594440-S	NM_003437.2	ZNF136	Homo sapiens zinc finger protein 136 (clone pHZ-20) (ZNF136), mRNA.	go_component: nucleus [goid 0005634] [evidence IEA]; go_function: transcription co-repressor activity [goid 0003714] [evidence TAS] [pmid 7649249]; go_function: specific RNA polymerase II transcription factor activity [goid 0003704] [evidence TAS] [pmid 7649249]; go_function: DNA binding [goid 0003677] [evidence IEA]; go_process: negative regulation of transcription from Pol II promoter [goid 000…	951.8	195.6	216.4	664.6	945.5	304.2	551.2	1461	900.6	1501.3	1431.1	1176.7	274.7	244.6	4203.3	149.3	157.8	2984.4	2495.3	473.2
592	GI_37595563-A	NM_000734.2	CD3Z	Homo sapiens CD3Z antigen, zeta polypeptide (TiT3 complex) (CD3Z), transcript variant 2, mRNA.	go_component: integral to plasma membrane [goid 0005887] [evidence NR]; go_component: plasma membrane [goid 0005886] [evidence TAS]; go_component: integral to membrane [goid 0016021] [evidence IEA]; go_component: T-cell receptor complex [goid 0042101] [evidence TAS]; go_function: T-cell receptor activity [goid 0004894] [evidence TAS] [pmid 3785426]; go_function: receptor signaling protein activit…	933.9	526.5	562.8	1334.9	990.1	468.9	805.8	1276	803.7	1294	1323.2	751.4	645.1	529.6	3460.1	319.4	307.7	2885.7	1815.1	247.7
593	GI_4502508-S	NM_001736.1	C5R1	Homo sapiens complement component 5 receptor 1 (C5a ligand) (C5R1), mRNA.	go_component: integral to plasma membrane [goid 0005887] [evidence TAS] [pmid 2007135]; go_component: plasma membrane [goid 0005886] [evidence E] [pmid 2007135]; go_function: C5a anaphylatoxin receptor activity [goid 0004944] [evidence TAS] [pmid 10352266]; go_function: rhodopsin-like receptor activity [goid 0001584] [evidence IEA]; go_process: activation of MAPK [goid 0000187] [evidence TAS] [pm…	1244	344.5	372.5	645.1	1402.2	341.7	1143.6	2867.6	855.5	1060.4	1093	945.7	514.9	483.3	3072.7	201.3	197.5	1535.7	2519.3	371.5
594	GI_42655861-S	XM_378914.1	KIAA0492	Homo sapiens KIAA0492 protein (KIAA0492), mRNA.		1037.3	283.3	325.6	801.9	890.7	455.3	811.3	1432.4	783.2	1124.8	1128.2	995	261	215	5643.3	129.8	124.8	2098.3	2222.5	328.8
595	GI_4504150-S	NM_002087.1	GRN	Homo sapiens granulin (GRN), mRNA.	go_component: extracellular [goid 0005576] [evidence NR]; go_function: growth factor activity [goid 0008083] [evidence P] [pmid 1542665]; go_process: positive regulation of cell proliferation [goid 0008284] [evidence NR]; go_process: signal transduction [goid 0007165] [evidence NR]; go_process: cell proliferation [goid 0008283] [evidence NR]; go_process: cell-cell signaling [goid 0007267] [eviden…	1351	216.2	266.2	883.1	1606.3	341.4	1058.2	1349.7	1267.7	1400	1260.2	1355.8	271.3	259.8	3822.7	137.9	127.8	1485.8	2157.2	398.8
596	GI_38683861-S	NM_005052.2	RAC3	Homo sapiens ras-related C3 botulinum toxin substrate 3 (rho family, small GTP binding protein Rac3) (RAC3), mRNA.	go_function: GTPase activity [goid 0003924] [evidence E] [pmid 9252344]; go_function: Rho small monomeric GTPase activity [goid 0003931] [evidence IEA]; go_function: GTP binding [goid 0005525] [evidence IEA]; go_process: intracellular signaling cascade [goid 0007242] [evidence P] [pmid 9252344]; go_process: small GTPase mediated signal transduction [goid 0007264] [evidence IEA]	797.1	404.9	565.7	992.2	930.8	924.5	696.2	622	1061.6	671.4	751.3	796.1	293.6	223.8	3982.7	191.6	170	3444	2425.8	946.6
597	GI_27545327-A	NM_024750.2	LRRC2	Homo sapiens leucine rich repeat containing 2 (LRRC2), mRNA.		1041.5	130.7	153	866.2	1188.3	394.1	792.5	1840.6	1035	1494.6	1372.9	1435.6	164.8	124.5	4498.9	85.6	79.6	1904.6	1641	574.9
598	GI_40806165-A	NM_022442.3	UBE2V1	Homo sapiens ubiquitin-conjugating enzyme E2 variant 1 (UBE2V1), transcript variant 3, mRNA.	go_function: ubiquitin conjugating enzyme activity [goid 0004840] [evidence E]; go_process: protein polyubiquitination [goid 0000209] [evidence E]; go_process: regulation of DNA repair [goid 0006282] [evidence P]; go_process: regulation of cell cycle [goid 0000074] [evidence E] [pmid 9418904]	943.3	612.3	675.4	1050.9	984.9	523.2	852.5	1071.1	708.1	901.1	895.9	712.3	517.1	495	3299.6	259.8	265.9	3016.8	2175.4	822.2
599	GI_26051239-S	NM_006291.2	TNFAIP2	Homo sapiens tumor necrosis factor, alpha-induced protein 2 (TNFAIP2), mRNA.	go_component: extracellular space [goid 0005615] [evidence TAS] [pmid 1374453]; go_process: angiogenesis [goid 0001525] [evidence IEA]	1338.7	234.3	258.8	1017.8	1065.1	328.4	1032.1	2760.8	1349.6	1383.5	1369.3	1028.9	505.8	477.2	2529.9	223.3	216	1146.6	2194.3	321.6
600	GI_22538464-S	NM_002795.2	PSMB3	Homo sapiens proteasome (prosome, macropain) subunit, beta type, 3 (PSMB3), mRNA.	go_component: 26S proteasome [goid 0005837] [evidence TAS] [pmid 8811196]; go_component: proteasome core complex (sensu Eukarya) [goid 0005839] [evidence IEA]; go_component: cytosol [goid 0005829] [evidence IEA]; go_function: peptidase activity [goid 0008233] [evidence IEA]; go_function: proteasome endopeptidase activity [goid 0004299] [evidence IEA]; go_function: endopeptidase activity [goid 000…	1010.7	330.5	374.1	748.9	1141.8	662.6	946.2	1564.6	851.8	1180.5	1270	1012.1	537.5	504.4	3176.2	216.2	223.8	1928.4	2757.2	342.7
601	GI_40288287-S	NM_199141.1	CARM1	Homo sapiens coactivator-associated arginine methyltransferase 1 (CARM1), mRNA.	go_function: methyltransferase activity [goid 0008168] [evidence IEA]; go_function: transferase activity [goid 0016740] [evidence IEA]	1196.9	251	323.4	962	954	602.6	927.7	410.5	760.3	657.3	790.4	481.2	620	598.3	3753.5	545.5	544.3	2369.2	3434.9	560.6
602	GI_4507174-S	NM_003120.1	SPI1	Homo sapiens spleen focus forming virus (SFFV) proviral integration oncogene spi1 (SPI1), mRNA.	go_component: nucleus [goid 0005634] [evidence IEA]; go_function: transcription activating factor [goid 0003710] [evidence E]; go_function: transcription factor activity [goid 0003700] [evidence TAS] [pmid 10867017]; go_function: translation regulator activity [goid 0045182] [evidence IEA]; go_process: negative regulation of transcription from Pol II promoter [goid 0000122] [evidence TAS] [pmid 1…	1311.7	112	142.6	566.1	1277.8	307.2	978.9	1491.1	825.7	1094.9	2112	1372.7	363.3	333.3	4262.6	143.9	139.8	1250.1	2158.5	372.9
603	GI_18426910-S	NM_080792.1	PTPNS1	Homo sapiens protein tyrosine phosphatase, non-receptor type substrate 1 (PTPNS1), mRNA.	go_component: plasma membrane [goid 0005886] [evidence TAS] [pmid 9070220]; go_component: membrane [goid 0016020] [evidence P]; go_component: integral to membrane [goid 0016021] [evidence IEA]; go_function: receptor activity [goid 0004872] [evidence IEA]; go_process: cell adhesion [goid 0007155] [evidence TAS] [pmid 9070220]	1581.7	321.8	394.3	721.7	1196.4	423.4	1459.2	1487.4	678.7	1090.2	1427	985	456.2	459.3	2323.1	251.4	252.1	2063.6	2673.5	362.7
604	GI_7108339-A	NM_013407.1	DHPS	Homo sapiens deoxyhypusine synthase (DHPS), transcript variant 3, mRNA.	go_function: deoxyhypusine synthase activity [goid 0004171] [evidence TAS] [pmid 8549832]; go_function: transferase activity [goid 0016740] [evidence IEA]; go_process: positive regulation of cell proliferation [goid 0008284] [evidence TAS] [pmid 8549832]; go_process: protein biosynthesis [goid 0006412] [evidence TAS] [pmid 7673224]; go_process: hypusine biosynthesis from peptidyl-lysine [goid 000…	1360.7	211.8	293.4	733.1	861.8	589.9	624	386.6	736.4	571.7	765.2	540	214.1	150.6	6944.3	189.7	160.1	2297.6	2393.5	510.5
605	GI_14043025-S	NM_003761.2	VAMP8	Homo sapiens vesicle-associated membrane protein 8 (endobrevin) (VAMP8), mRNA.	go_component: synaptic vesicle [goid 0008021] [evidence NR]; go_component: early endosome [goid 0005769] [evidence TAS] [pmid 9614193]; go_component: membrane fraction [goid 0005624] [evidence TAS] [pmid 9614193]; go_process: nonselective vesicle docking [goid 0006904] [evidence NR]; go_process: nonselective vesicle transport [goid 0006899] [evidence TAS] [pmid 9614193]; go_process: protein compl…	1076.9	428.8	471.1	1577	1091.6	886.7	881.7	1115.3	1164.4	1545.4	759.2	732.9	531.4	493.8	2909.5	178.8	161.9	1973.9	2159.2	343.4
606	GI_11056051-S	NM_021642.1	FCGR2A	Homo sapiens Fc fragment of IgG, low affinity IIa, receptor for (CD32) (FCGR2A), mRNA.	go_component: integral to membrane [goid 0016021] [evidence IEA]; go_component: plasma membrane [goid 0005886] [evidence NR] [pmid 2139735]; go_function: receptor signaling protein activity [goid 0005057] [evidence NR]; go_function: receptor activity [goid 0004872] [evidence IEA]; go_function: IgG binding [goid 0019864] [evidence IEA]; go_process: immune response [goid 0006955] [evidence NR]	817.3	563.5	592.1	641.1	1351.9	617.1	786.2	1266	755.7	780.9	1046.1	718.1	1035.4	893.6	1561	208.7	205.1	2517.8	3746.7	351
607	GI_24497593-A	NM_003863.2	DPM2	Homo sapiens dolichyl-phosphate mannosyltransferase polypeptide 2, regulatory subunit (DPM2), transcript variant 1, mRNA.	go_component: endoplasmic reticulum membrane [goid 0005789] [evidence E] [pmid 9724629]; go_process: protein amino acid glycosylation [goid 0006486] [evidence E] [pmid 9724629]	878	532.8	539.1	528.8	798.1	454.6	771.5	361.1	899.3	613.4	589.7	558.2	567.4	516.4	3473.1	367.5	366.8	3900.7	2882.4	834
608	GI_21361271-S	NM_005934.2	MLLT1	Homo sapiens myeloid/lymphoid or mixed-lineage leukemia (trithorax homolog, Drosophila); translocated to, 1 (MLLT1), mRNA.	go_component: nucleus [goid 0005634] [evidence TAS] [pmid 8080983]; go_function: RNA polymerase II transcription factor activity [goid 0003702] [evidence TAS] [pmid 8080983]; go_function: transcription activating factor [goid 0003710] [evidence E] [pmid 8080983]; go_function: DNA binding [goid 0003677] [evidence TAS] [pmid 7991593]; go_process: oncogenesis [goid 0007048] [evidence TAS] [pmid 8080…	1175.2	214.1	266.9	504.5	523.6	475.5	528.4	536.2	502.2	576.1	473.4	431.2	265.4	153.7	7643.3	156.5	131	3158.3	2343.7	364
609	GI_7657006-S	NM_014395.1	DAPP1	Homo sapiens dual adaptor of phosphotyrosine and 3-phosphoinositides (DAPP1), mRNA.	go_function: phospholipid binding [goid 0005543] [evidence TAS] [pmid 10432293]; go_process: signal transduction [goid 0007165] [evidence P] [pmid 10432293]; go_process: intracellular signaling cascade [goid 0007242] [evidence IEA]	956.5	139.8	189.1	807.6	1304.9	354.4	787.3	1951	930.2	1522.4	1363.7	1388.9	223.9	164.3	4004.5	102.7	94.5	1855.7	1664.9	515.1
610	GI_32261305-S	NM_003870.2	IQGAP1	Homo sapiens IQ motif containing GTPase activating protein 1 (IQGAP1), mRNA.	go_component: actin filament [goid 0005884] [evidence TAS] [pmid 8670801]; go_component: peripheral plasma membrane protein [goid 0000157] [evidence P] [pmid 8051149]; go_function: GTPase inhibitor activity [goid 0005095] [evidence TAS] [pmid 8670801]; go_function: protein binding [goid 0005515] [evidence E] [pmid 8670801]; go_function: GTPase activator activity [goid 0005096] [evidence P] [pmid …	892.6	524.7	611.2	830.3	999	616.7	729.4	2341.9	795.7	974.8	933.1	537.1	729.7	596.9	1964.7	232.8	179.1	2471.1	2995.6	332.1
611	GI_23346425-S	NM_004046.3	ATP5A1	Homo sapiens ATP synthase, H+ transporting, mitochondrial F1 complex, alpha subunit, isoform 1, cardiac muscle (ATP5A1), mRNA.	go_component: proton-transporting ATP synthase complex (sensu Eukarya) [goid 0005753] [evidence TAS] [pmid 1830491]; go_component: obsolete [goid 0008370] [evidence NR]; go_component: proton-transporting two-sector ATPase complex [goid 0016469] [evidence IEA]; go_component: membrane fraction [goid 0005624] [evidence NR]; go_component: mitochondrion [goid 0005739] [evidence TAS] [pmid 1830491]; go…	1092	344.9	391	1017.5	1180.2	454.6	879.1	1542.2	923.9	1061.6	1836.3	817.2	533.2	476.3	2503.2	264.4	236.4	2433.4	1943.5	298.4
612	GI_13027808-A	NM_022718.1	MMP25	Homo sapiens matrix metalloproteinase 25 (MMP25), transcript variant 2, mRNA.	go_component: membrane [goid 0016020] [evidence NAS] [pmid 11034316]; go_component: extracellular matrix [goid 0005578] [evidence NAS] [pmid 10628838]; go_function: zinc ion binding [goid 0008270] [evidence IEA]; go_function: metalloendopeptidase activity [goid 0004222] [evidence IEA]; go_function: hydrolase activity [goid 0016787] [evidence IEA]; go_process: proteolysis and peptidolysis [goid 00…	1404.4	211.3	230.9	765.6	1469.1	484.7	1140	2288.7	761.2	1269	793.2	980	494.9	434.4	2865.4	230.4	203.3	1269.1	2577.4	308.5
613	GI_17149837-I	NM_000801.2	FKBP1A	Homo sapiens FK506 binding protein 1A, 12kDa (FKBP1A), transcript variant 12B, mRNA.	go_component: nucleus [goid 0005634] [evidence IEA]; go_function: receptor activity [goid 0004872] [evidence TAS] [pmid 7518616]; go_function: FK506 binding [goid 0005528] [evidence NR]; go_function: cyclophilin [goid 0004600] [evidence IEA]; go_function: isomerase activity [goid 0016853] [evidence IEA]; go_function: FK506-sensitive peptidyl-prolyl cis-trans isomerase [goid 0030051] [evidence IEA…	1164.4	208.3	247.9	956.1	1376.8	610.6	950.4	1482.8	963.9	1035.1	1529.5	1037.8	353.2	291.3	3131	147.1	161.5	1711.3	2271	530.7
614	GI_32880228-S	NM_031454.1	SELO	Homo sapiens selenoprotein O (SELO), mRNA.		946.4	353.8	443.1	861.1	860.8	680.2	710.7	863.8	889	721.6	835.8	797.3	344.4	243.9	3873.1	219.5	216	2959.7	2489.7	661.5
615	GI_32813446-S	NM_182588.1	DKFZp686P0288	Homo sapiens similar to Ran-binding protein 2 (DKFZp686P0288), mRNA.		930.3	238.6	287.9	687.8	1015.2	397.5	611.4	1297.7	937.2	1301.2	1392.5	1085.3	264.4	265.7	3777.2	126.3	154	2547.4	2063.5	521
616	GI_20336759-S	NM_006026.2	H1FX	Homo sapiens H1 histone family, member X (H1FX), mRNA.	go_component: chromosome [goid 0005694] [evidence IEA]; go_component: nucleus [goid 0005634] [evidence IEA]; go_component: nucleosome [goid 0005718] [evidence NAS]; go_component: nucleosome [goid 0000786] [evidence NAS]; go_function: DNA binding [goid 0003677] [evidence NAS]; go_process: nucleosome assembly [goid 0006334] [evidence NAS]; go_process: chromosome organization and biogenesis (sensu E…	1111.5	206.3	219.9	889.2	1179.6	604.9	756.4	1234	1092.8	1185.4	1132.8	1163.6	291.6	257.8	4070.6	173.2	162.3	2244.3	1545.8	341.9
617	GI_8923736-S	NM_017567.1	NAGK	Homo sapiens N-acetylglucosamine kinase (NAGK), mRNA.	go_function: ATP binding [goid 0005524] [evidence IEA]; go_function: kinase activity [goid 0016301] [evidence IEA]; go_function: transferase activity [goid 0016740] [evidence IEA]; go_function: N-acetylglucosamine kinase activity [goid 0045127] [evidence IEA]; go_process: N-acetylmannosamine metabolism [goid 0006051] [evidence TAS] [pmid 10824116]; go_process: N-acetylglucosamine metabolism [goid…	1260.7	247.3	290.3	968.9	928.6	375.6	981.6	1474.7	1175	1188.8	1528.9	968.4	489.3	412.5	3027.6	239.3	214.5	1405.1	2284.4	367.1
618	GI_21536438-A	NM_012161.2	FBXL5	Homo sapiens F-box and leucine-rich repeat protein 5 (FBXL5), transcript variant 1, mRNA.	go_function: ubiquitin conjugating enzyme activity [goid 0004840] [evidence P] [pmid 10531035]; go_function: ubiquitin-protein ligase activity [goid 0004842] [evidence P] [pmid 10531035]; go_process: proteolysis and peptidolysis [goid 0006508] [evidence P] [pmid 10531035]	864.7	480.2	553.8	1017.3	903.3	704.6	844.6	2716.3	803.3	1154.6	899.7	647.9	564.5	444.9	1554.3	209.9	182.6	1929.3	2994.4	280.1
619	GI_5174700-S	NM_005990.1	STK10	Homo sapiens serine/threonine kinase 10 (STK10), mRNA.	go_function: protein serine/threonine kinase activity [goid 0004674] [evidence E]; go_process: protein amino acid phosphorylation [goid 0006468] [evidence E]	1086.5	357.3	418.4	1065.1	1326.9	497	898.1	1571.1	721.3	958.6	1080	849.9	392.3	392.3	2952.7	199.9	215.2	2170.9	2231.4	363.5
620	GI_19923159-S	NM_003082.2	SNAPC1	Homo sapiens small nuclear RNA activating complex, polypeptide 1, 43kDa (SNAPC1), mRNA.	go_process: transcription from Pol III promoter [goid 0006383] [evidence NR]; go_process: transcription from Pol II promoter [goid 0006366] [evidence NR]; go_process: regulation of transcription, DNA-dependent [goid 0006355] [evidence IEA]	856.7	63.9	93.6	740.3	916	277.8	550.7	2427	974.5	1542.4	1027.4	1630.5	77.6	50.6	4871.5	48.8	37.4	1665.4	1332.4	544.6
621	GI_21361267-S	NM_006058.2	TNIP1	Homo sapiens TNFAIP3 interacting protein 1 (TNIP1), mRNA.	go_component: kinesin complex [goid 0005871] [evidence IEA]; go_component: nucleus [goid 0005634] [evidence IEA]; go_function: protein binding [goid 0005515] [evidence TAS] [pmid 11090181]; go_process: pathogenesis [goid 0009405] [evidence E] [pmid 9923610]; go_process: protein biosynthesis [goid 0006412] [evidence E] [pmid 9923610]; go_process: defense response [goid 0006952] [evidence P] [pmid …	1189	228.6	287.1	657.3	1213.7	492.3	1011.2	1064.7	1141.1	911	1191.9	816.6	462.4	418.6	3043.1	299.5	311.1	2298.4	2023	651.2
622	GI_4506516-S	NM_002923.1	RGS2	Homo sapiens regulator of G-protein signalling 2, 24kDa (RGS2), mRNA.	go_component: peripheral plasma membrane protein [goid 0000157] [evidence P] [pmid 8673468]; go_function: GTPase activator activity [goid 0005096] [evidence TAS] [pmid 10747990]; go_function: calmodulin binding [goid 0005516] [evidence TAS] [pmid 10747990]; go_function: signal transducer activity [goid 0004871] [evidence IEA]; go_process: regulation of G-protein coupled receptor protein signaling…	1028.4	356.3	424	886.4	1661.8	593.8	972	2049.6	1173.5	976.2	1430.4	726.8	569	464.6	1552.2	212.3	201.9	1848.2	2200.7	285
623	GI_29747360-S	XM_292526.1	LOC342405	Homo sapiens similar to peptidylprolyl isomerase A (cyclophilin A) (LOC342405), mRNA.		765.8	152.1	184.5	879.8	1115	532.8	809.3	2083.5	1185.1	1340.7	1377.6	851	387.5	176.5	2698.2	156.3	129.6	2864.2	1448.8	378.8
624	GI_20357564-S	NM_000100.2	CSTB	Homo sapiens cystatin B (stefin B) (CSTB), mRNA.	go_component: nucleus [goid 0005634] [evidence IEA]; go_function: endopeptidase inhibitor activity [goid 0004866] [evidence E]; go_function: cysteine protease inhibitor activity [goid 0004869] [evidence IEA]	986.7	356.8	414.2	1028	1026.2	440	765.2	1180.1	830	1007.8	1136.2	882.3	407	371.6	3205.8	155.9	153.5	2227.7	2615	312.8
625	GI_42544234-S	NM_016630.3	ACP33	Homo sapiens acid cluster protein 33 (ACP33), mRNA.	go_function: catalytic activity [goid 0003824] [evidence IEA]	1014.6	424.2	495.6	875.2	1044.8	567.9	949.8	1770	692.4	864.2	1097.1	749.6	428.7	400.5	2929.1	174	174	2029	2557.1	262.1
626	GI_6552331-S	NM_005803.2	FLOT1	Homo sapiens flotillin 1 (FLOT1), mRNA.	go_component: caveola [goid 0005901] [evidence TAS] [pmid 9153235]; go_component: integral to membrane [goid 0016021] [evidence TAS] [pmid 9153235]; go_component: flotillin complex [goid 0016600] [evidence IEA]	907.1	395.3	456.7	707.2	1247	332	780.6	946.3	630.9	799.6	1273.2	835	655.5	582.7	3629.2	266.9	261.9	1776.3	2725.6	289.7
627	GI_4557668-S	NM_000418.1	IL4R	Homo sapiens interleukin 4 receptor (IL4R), mRNA.	go_component: integral to plasma membrane [goid 0005887] [evidence TAS] [pmid 2307934]; go_function: interleukin-4 receptor activity [goid 0004913] [evidence TAS] [pmid 2307934]; go_function: receptor signaling protein activity [goid 0005057] [evidence TAS] [pmid 2307934]; go_function: receptor activity [goid 0004872] [evidence IEA]; go_function: hematopoietin/interferon-class (D200-domain) cytok…	883.5	383.9	429.1	778.5	1318	657.2	750.7	1021.6	642.4	912.8	859.5	660.7	663.2	597.5	3091.2	256.3	263.5	2491.3	2507.1	305.1
628	GI_18105039-S	NM_001867.2	COX7C	Homo sapiens cytochrome c oxidase subunit VIIc (COX7C), nuclear gene encoding mitochondrial protein, mRNA.	go_component: mitochondrion [goid 0005739] [evidence IEA]; go_function: aa3-type cytochrome c oxidase [goid 0009481] [evidence IEA]; go_function: cytochrome-c oxidase activity [goid 0004129] [evidence IEA]; go_function: oxidoreductase activity [goid 0016491] [evidence IEA]; go_function: ba3-type cytochrome c oxidase [goid 0009482] [evidence IEA]; go_function: caa3-type cytochrome c oxidase [goid …	646.1	445.1	492.5	919.3	903.9	556.4	634.1	3678.8	1049.1	1192.9	921.5	422.3	472.1	347.5	1821.6	168.9	150.1	2271.5	1943.6	414.1
629	GI_37547347-S	XM_065237.5	LOC129439	Homo sapiens similar to FKSG30 (LOC129439), mRNA.		716.1	421.1	502	659.1	1441.4	338.7	681.9	1681.8	814.3	770.1	2770.1	693.2	552.2	402	1205	200	176	3214.8	1777.4	431.5
630	GI_21703709-S	NM_016479.3	SCOTIN	Homo sapiens scotin (SCOTIN), mRNA.		759.6	309.2	350.5	514.6	1289.5	366.7	687.2	937.8	675.3	883	1580.1	943.9	606.8	508	3481.8	364.9	355.5	1824.7	2687.6	276.6
631	GI_22726178-S	NM_002300.3	LDHB	Homo sapiens lactate dehydrogenase B (LDHB), mRNA.	go_function: L-lactate dehydrogenase activity [goid 0004459] [evidence TAS] [pmid 8314553]; go_function: oxidoreductase activity [goid 0016491] [evidence IEA]; go_process: glycolysis [goid 0006096] [evidence IEA]	1035.8	355.6	419.8	847.7	1482.5	497.7	863.9	894.3	1159.8	998.6	1307.9	794.5	521.8	403	3283.5	347	310.6	2605	946.9	327.3
632	GI_28466986-I	NM_018579.2	MSCP	Homo sapiens mitochondrial solute carrier protein (MSCP), mRNA.		677.2	1068.4	1279.2	636.2	1100.3	379	566.6	625.6	647.3	509.4	1159.8	517.7	427.5	394.7	1867.9	466.9	458.3	3621	1969.1	1019.6
633	GI_31542848-S	NM_006877.2	GMPR	Homo sapiens guanosine monophosphate reductase (GMPR), mRNA.	go_function: GMP reductase activity [goid 0003920] [evidence TAS] [pmid 9813009]; go_function: oxidoreductase activity [goid 0016491] [evidence IEA]; go_process: response to cold [goid 0009409] [evidence TAS] [pmid 9813009]; go_process: nucleobase, nucleoside, nucleotide and nucleic acid metabolism [goid 0006139] [evidence NR]; go_process: nucleotide metabolism [goid 0009117] [evidence IEA]	898	658.7	684.4	577.4	722.1	570.9	738	314.4	828.5	500.8	801.2	526.2	690.4	640.3	3013	334.8	327.8	3577.8	1368.7	1504.2
634	GI_8670543-A	NM_017456.1	PSCD1	Homo sapiens pleckstrin homology, Sec7 and coiled-coil domains 1(cytohesin 1) (PSCD1), transcript variant 2, mRNA.	go_component: kinesin complex [goid 0005871] [evidence IEA]; go_function: ARF guanyl-nucleotide exchange factor activity [goid 0005086] [evidence TAS] [pmid 9050849]; go_function: guanyl-nucleotide release factor activity [goid 0019839] [evidence IEA]; go_process: vesicle-mediated transport [goid 0016192] [evidence TAS] [pmid 1511013]	1182.3	351.7	378.5	668.5	1021	365.5	971	1476	788.8	1148.9	1534.9	747.4	575.9	546.7	2212	278.5	263.3	2455.7	1990.3	280.5
635	GI_17446851-S	XM_065828.1	LOC130678	Homo sapiens similar to 60S acidic ribosomal protein P1 (LOC130678), mRNA.		903.4	88.5	117.6	709.1	1040.4	456.3	573.7	2039.4	1053.6	1306.6	1362.1	1213.4	126.6	85.7	4965.1	62.7	58	1431.5	1325	298.5
636	GI_4758077-S	NM_004383.1	CSK	Homo sapiens c-src tyrosine kinase (CSK), mRNA.	go_component: cytoplasm [goid 0005737] [evidence NR]; go_function: protein C-terminus binding [goid 0008022] [evidence TAS] [pmid 8890164]; go_function: protein-tyrosine kinase activity [goid 0004713] [evidence TAS] [pmid 1945408]; go_function: ATP binding [goid 0005524] [evidence IEA]; go_function: transferase activity [goid 0016740] [evidence IEA]; go_process: protein amino acid phosphorylation…	1198.3	158.2	186.8	718.5	1229.6	446.5	960.1	1368.1	784.1	1183.3	1344	996.8	369.9	329.9	3166.2	171.3	183.3	2067.8	2015.3	307.1
637	GI_38257140-S	NM_002746.1	MAPK3	Homo sapiens mitogen-activated protein kinase 3 (MAPK3), mRNA.	go_component: cellular_component unknown [goid 0008372] [evidence ND]; go_function: protein serine/threonine kinase activity [goid 0004674] [evidence IEA] [pmid 1540184]; go_function: MAP kinase activity [goid 0004707] [evidence NAS] [pmid 7687743]; go_function: ATP binding [goid 0005524] [evidence NAS]; go_function: transferase activity [goid 0016740] [evidence IEA]; go_function: cAMP-dependent …	1334.2	199.1	205.7	663.7	1321.5	462.6	1109.4	1874.3	804	1093.6	1407.5	1177.6	361.8	356	2509.3	159.2	143	1701.5	1913.3	378.8
638	GI_11496985-S	NM_012072.2	C1QR1	Homo sapiens complement component 1, q subcomponent, receptor 1 (C1QR1), mRNA.	go_component: integral to membrane [goid 0016021] [evidence IC] [pmid 9047234]; go_component: membrane fraction [goid 0005624] [evidence P] [pmid 9047234]; go_component: integral to plasma membrane [goid 0005887] [evidence E] [pmid 9047234]; go_function: receptor activity [goid 0004872] [evidence NAS] [pmid 9047234]; go_function: lectin [goid 0005530] [evidence IEA]; go_function: sugar binding [g…	1042.4	332.9	377.7	987	861.9	467.8	946.2	2945.7	718.2	1124.8	1132.8	621.6	264.8	248.2	2160.8	135.4	140.9	1549.9	2843.6	247.7
639	GI_19923366-S	NM_006640.2	MSF	Homo sapiens MLL septin-like fusion (MSF), mRNA.	go_component: cytoplasm [goid 0005737] [evidence P] [pmid 10339604]; go_function: GTPase activity [goid 0003924] [evidence P] [pmid 10339604]	967.4	308.4	338.2	529.2	935.9	379.3	689.5	1072.1	840.7	798.4	1218.1	749.1	493.7	454.6	4067	342	288.9	2530.5	1793	300.2
640	GI_10864008-I	NM_021198.1	CTDSP1	Homo sapiens CTD (carboxy-terminal domain, RNA polymerase II, polypeptide A) small phosphatase 1 (CTDSP1), mRNA.		1150.5	201.3	206.4	679	1170.9	254	1013.2	1291.7	1038.2	1414.3	1365.8	1157	506.2	445.3	2749.2	268.6	248.8	1664.2	1885.7	344.2
641	GI_34147575-S	NM_004221.3	NK4	Homo sapiens natural killer cell transcript 4 (NK4), mRNA.	go_component: extracellular space [goid 0005615] [evidence P] [pmid 1729377]; go_function: cell adhesion molecule activity [goid 0005194] [evidence P] [pmid 1729377]; go_process: cell adhesion [goid 0007155] [evidence P] [pmid 1729377]; go_process: defense response [goid 0006952] [evidence P] [pmid 1729377]; go_process: immune response [goid 0006955] [evidence P] [pmid 1729377]	744.4	382.9	459	690.9	777.7	290	569.7	1242.4	715.8	1050.1	1598.7	834.9	450.7	396	3419	271.3	288.8	3069.1	1487.5	304.5
642	GI_34222355-S	NM_005067.4	SIAH2	Homo sapiens seven in absentia homolog 2 (Drosophila) (SIAH2), mRNA.	go_component: nucleus [goid 0005634] [evidence IEA]; go_component: cytoplasm [goid 0005737] [evidence TAS] [pmid 10207103]; go_function: transcription co-repressor activity [goid 0003714] [evidence TAS] [pmid 10207103]; go_process: small GTPase mediated signal transduction [goid 0007264] [evidence TAS] [pmid 10207103]; go_process: ubiquitin-dependent protein catabolism [goid 0006511] [evidence TA…	598	967.6	1096.3	454.6	627.3	491.1	591.8	638.7	478.6	617.9	779.5	501.1	851.8	691.4	2158.5	317	311.8	3806.3	1398.4	1659.2
643	GI_34147677-S	NM_015853.3	LOC51035	Homo sapiens ORF (LOC51035), mRNA.		1049.7	236.2	264.8	796.9	1143.4	430.8	864.4	1291.9	1112	1096.3	1195.2	943	351.1	317.4	3464.3	182.1	158.5	2116.5	1641	356.7
644	GI_4504390-A	NM_000188.1	HK1	Homo sapiens hexokinase 1 (HK1), nuclear gene encoding mitochondrial protein, transcript variant 1, mRNA.	go_component: membrane [goid 0016020] [evidence IEA]; go_function: hexokinase activity [goid 0004396] [evidence TAS] [pmid 3207429]; go_function: ATP binding [goid 0005524] [evidence IEA]; go_function: kinase activity [goid 0016301] [evidence IEA]; go_function: transferase activity [goid 0016740] [evidence IEA]; go_process: glycolysis [goid 0006096] [evidence TAS] [pmid 3207429]	937.7	331.8	372.8	589	1077.7	334	775.4	746.8	875.7	889.7	1177.4	727.1	747.9	658.8	2935.6	374.3	343	2508.5	1738.2	836.3
645	GI_20336745-A	NM_138609.1	H2AFY	Homo sapiens H2A histone family, member Y (H2AFY), transcript variant 1, mRNA.	go_component: chromosome [goid 0005694] [evidence IEA]; go_component: nucleus [goid 0005634] [evidence IEA]; go_component: nucleosome [goid 0000786] [evidence NAS] [pmid 9714746]; go_function: DNA binding [goid 0003677] [evidence NAS] [pmid 9714746]; go_process: nucleosome assembly [goid 0006334] [evidence NAS] [pmid 9714746]; go_process: chromosome organization and biogenesis (sensu Eukarya) [go…	1016.9	458.3	491.8	840.8	844.1	424.6	847.8	1766.5	686.8	962.2	970.1	739.6	384.3	409.9	2128.7	194.1	182.6	2335.6	2873.5	262.8
646	GI_5902127-S	NM_006949.1	STXBP2	Homo sapiens syntaxin binding protein 2 (STXBP2), mRNA.	go_component: cellular_component unknown [goid 0008372] [evidence ND]; go_function: protein transporter activity [goid 0008565] [evidence IEA]; go_function: syntaxin-2 binding [goid 0030347] [evidence NAS]; go_function: syntaxin-3 binding [goid 0030348] [evidence NAS]; go_process: protein secretion [goid 0009306] [evidence IEA]; go_process: intracellular protein transport [goid 0006886] [evidence…	1235.4	171.7	204.7	566.9	992.6	345.1	863.1	1230.7	867.2	1161.9	1374.6	1063.1	413.2	374.3	3482.7	195.1	191.2	1580.5	1987	501.8
647	GI_20070134-S	NM_001469.2	G22P1	Homo sapiens thyroid autoantigen 70kDa (Ku antigen) (G22P1), mRNA.	go_component: membrane fraction [goid 0005624] [evidence TAS] [pmid 2917966]; go_component: nucleus [goid 0005634] [evidence TAS] [pmid 10508516]; go_function: double-stranded DNA binding [goid 0003690] [evidence TAS] [pmid 7957065]; go_function: ATP dependent DNA helicase activity [goid 0004003] [evidence TAS] [pmid 7957065]; go_function: DNA binding [goid 0003677] [evidence NR]; go_function: he…	940.8	270	326.6	950	1063.2	500.2	729.6	1013.3	725.8	1009.7	993.4	871.6	450.4	406.1	3473	226	219.1	2398.4	1938.2	287.2
648	GI_38327657-A	NM_198596.1	SULF2	Homo sapiens sulfatase 2 (SULF2), transcript variant 2, mRNA.	go_component: Golgi apparatus [goid 0005794] [evidence IEA]; go_component: endoplasmic reticulum [goid 0005783] [evidence IEA]; go_function: sulfuric ester hydrolase activity [goid 0008484] [evidence IEA]; go_function: carboxy-lyase activity [goid 0016831] [evidence IEA]; go_function: hydrolase activity [goid 0016787] [evidence IEA]; go_process: amino acid metabolism [goid 0006520] [evidence IEA]…	1037.2	184.5	206.9	864.8	1198.5	484.9	810.8	1691.2	959.2	886.6	1677.4	747.3	392.1	361.8	2943.8	161.4	155.9	1696.9	1994.2	276.2
649	GI_28373091-A	NM_175039.1	SIAT7D	Homo sapiens sialyltransferase 7D ((alpha-N-acetylneuraminyl-2,3-beta-galactosyl-1,3)-N-acetyl galactosaminide alpha-2,6-sialyltransferase) (SIAT7D), transcript variant 2, mRNA.	go_component: soluble fraction [goid 0005625] [evidence P] [pmid 10207017]; go_component: Golgi apparatus [goid 0005794] [evidence IEA]; go_component: integral to membrane [goid 0016021] [evidence IEA]; go_function: sialyltransferase activity [goid 0008373] [evidence IEA] [pmid 10207017]; go_function: transferase activity, transferring glycosyl groups [goid 0016757] [evidence IEA]; go_function: (…	885.3	675.1	735.4	712.2	1198.4	890.4	790.9	433.3	908.7	602.6	608	554.7	539.6	545.5	3412.6	300.3	288.7	1688.6	2102.7	804.4
650	GI_37545911-S	XM_113763.4	DKFZP434I1735	Homo sapiens DKFZP434I1735 protein (DKFZP434I1735), mRNA.		850.7	188.4	246.9	892.8	967.4	441.1	645.9	1923.3	796.2	1388	1010	1193.8	154.9	123.5	3940.2	83.6	72.3	1790.4	1520.3	447
651	GI_40255146-S	NM_152529.3	GPR155	Homo sapiens G protein-coupled receptor 155 (GPR155), mRNA.	go_component: integral to membrane [goid 0016021] [evidence IEA]; go_function: molecular_function unknown [goid 0005554] [evidence IEA]; go_function: G-protein coupled receptor activity [goid 0004930] [evidence IEA]; go_process: intracellular signaling cascade [goid 0007242] [evidence IEA]	812.7	256.7	301	678	852.7	382.7	546	1309.9	861.8	1105.8	1172.7	1042.5	282.8	292.8	3632.7	153.1	154.6	2336.7	2093.3	395.6
652	GI_28416432-S	NM_018326.2	HIMAP4	Homo sapiens immunity associated protein 4 (HIMAP4), mRNA.	go_function: GTP binding [goid 0005525] [evidence IEA]	831	605.3	690.6	1052.3	1020.7	633.5	845.3	1182.9	712.1	996.5	1024.4	633.5	622.8	537.9	2324.8	306.6	301.8	2194.2	1880.8	259.6
653	GI_42662647-S	XM_378143.1	LOC402429	Homo sapiens similar to tau tubulin kinase 2; tau-tubulin kinase (LOC402429), mRNA.		1039.1	150.1	209.3	854.8	825.6	706.1	750.1	380.6	866.6	622.4	696.2	654.6	161.5	80.2	5477.2	143.5	107.9	2135.7	2262.1	522.6
654	GI_14600335-S	NM_019119.3	PCDHB9	Homo sapiens protocadherin beta 9 (PCDHB9), mRNA.	go_component: integral to membrane [goid 0016021] [evidence NAS] [pmid 11322959]; go_function: calcium-dependent cell adhesion molecule activity [goid 0008014] [evidence NAS] [pmid 11322959]; go_function: calcium ion binding [goid 0005509] [evidence IEA]; go_process: synaptogenesis [goid 0007416] [evidence TAS] [pmid 12231349]; go_process: regulation of synapse [goid 0007273] [evidence TAS] [pmid…	887	115.6	127.5	737.7	878.8	377.9	599.6	1966.6	740.9	1398.9	849	1108.8	113.1	62.1	5368.6	48.5	38.9	1430	1453	331.1
655	GI_20270302-S	NM_138769.1	ARHT2	Homo sapiens ras homolog gene family, member T2 (ARHT2), mRNA.		1094.5	298.8	325.1	1138	1049.8	460.3	969.6	1704.7	879.5	1142.1	1005.9	772.2	425.7	379.7	2483.7	200.2	199.1	1811.1	1854.6	330.3
656	GI_7661831-S	NM_014188.1	HSPC182	Homo sapiens HSPC182 protein (HSPC182), mRNA.		1038.8	426.3	498.5	994.1	1039.4	518.2	882.6	1258.4	765.3	962.8	963.8	795.3	419	402.5	2309	192.4	183.4	2150.2	2377.4	328.6
657	GI_4503528-S	NM_001416.1	EIF4A1	Homo sapiens eukaryotic translation initiation factor 4A, isoform 1 (EIF4A1), mRNA.	go_component: eukaryotic translation initiation factor 4 complex [goid 0008304] [evidence P]; go_function: helicase activity [goid 0004386] [evidence P]; go_function: translation factor activity, nucleic acid binding [goid 0008135] [evidence P]; go_function: mRNA binding [goid 0003729] [evidence P]; go_function: adenosinetriphosphatase activity [goid 0004002] [evidence P]; go_process: binding to …	941.9	265.9	337.2	684.4	920.2	294.1	700.2	947.4	911.5	937.1	1622.9	892.9	343.3	300.1	3201.6	181.5	182.4	2312.4	2222.5	278.1
658	GI_4505370-S	NM_002496.1	NDUFS8	Homo sapiens NADH dehydrogenase (ubiquinone) Fe-S protein 8, 23kDa (NADH-coenzyme Q reductase) (NDUFS8), mRNA.	go_component: NADH dehydrogenase complex (ubiquinone) (sensu Eukarya) [goid 0005748] [evidence TAS] [pmid 9666055]; go_component: mitochondrion [goid 0005739] [evidence IEA]; go_component: membrane fraction [goid 0005624] [evidence NR]; go_function: iron-sulfur electron transfer carrier [goid 0008042] [evidence TAS] [pmid 9837812]; go_function: NADH dehydrogenase (ubiquinone) activity [goid 00081…	1158.7	213.8	256.1	803.8	938.3	497.4	980.1	1165.7	878.1	1344.4	989	1101.7	348.1	319.1	3270.5	176.8	164.3	1774.1	1770.1	323.9
659	GI_41149336-S	XM_372315.1	LOC389974	Homo sapiens similar to 60S ribosomal protein L12 (LOC389974), mRNA.		884.3	93.4	110.1	812.6	1372.1	457.5	685.8	1538.2	1017.8	1113	1309.4	1035	213.7	109.3	3545.2	114.7	82.5	2060.5	1466.2	335.8
660	GI_5803206-S	NM_006758.1	U2AF1	Homo sapiens U2(RNU2) small nuclear RNA auxiliary factor 1 (U2AF1), mRNA.	go_component: Cajal body [goid 0015030] [evidence TAS] [pmid 1388271]; go_component: nucleus [goid 0005634] [evidence IEA]; go_component: spliceosome complex [goid 0005681] [evidence IEA]; go_function: pre-mRNA splicing factor activity [goid 0008248] [evidence TAS] [pmid 1388271]; go_function: RNA binding [goid 0003723] [evidence IEA]; go_function: DNA binding [goid 0003677] [evidence IEA]; go_pr…	939	264.6	294.8	816.3	1018.5	530.4	774.8	1475.1	787.2	1273.4	935.6	663.8	481	445.3	3225.4	183	178.9	1892.3	1921.3	247.7
661	GI_22202636-A	NM_145897.1	PFDN5	Homo sapiens prefoldin 5 (PFDN5), transcript variant 3, mRNA.	go_component: nucleus [goid 0005634] [evidence E] [pmid 9792694]; go_function: transcription co-repressor activity [goid 0003714] [evidence E] [pmid 9792694]; go_process: regulation of transcription, DNA-dependent [goid 0006355] [evidence E] [pmid 9792694]	603.4	409.3	463.4	1097.8	932.7	757.5	534.2	1891.3	1107.8	1057.1	804.7	414.2	444.7	370.5	2056	241.8	219	2494.6	2168.6	274.7
662	GI_12056462-S	NM_012151.2	F8A	Homo sapiens coagulation factor VIII-associated (intronic transcript) (F8A), mRNA.	go_component: cellular_component unknown [goid 0008372] [evidence ND]; go_function: molecular_function unknown [goid 0005554] [evidence ND]; go_process: biological_process unknown [goid 0000004] [evidence ND]	887.4	316.8	364.8	600.5	1058	321.3	778.7	1352.4	658.9	932.1	1387.2	873.8	588.1	512	3641.6	251.2	240.8	1662.4	1597.1	279.7
663	GI_31543400-S	NM_002648.2	PIM1	Homo sapiens pim-1 oncogene (PIM1), mRNA.	go_component: cytoplasm [goid 0005737] [evidence TAS] [pmid 1825810]; go_component: nucleus [goid 0005634] [evidence IEA]; go_function: protein serine/threonine kinase activity [goid 0004674] [evidence TAS] [pmid 1825810]; go_function: cAMP-dependent protein kinase activity [goid 0004691] [evidence IEA]; go_function: protein kinase CK2 activity [goid 0004682] [evidence IEA]; go_function: ATP bind…	815.6	332.6	334.6	807.3	738.2	403.1	811.4	728.3	691.7	747.7	614.7	567.2	665.3	546.7	1787.1	517.8	531	4464.3	1593.8	594.5
664	GI_15011920-S	NM_018648.2	NOLA3	Homo sapiens nucleolar protein family A, member 3 (H/ACA small nucleolar RNPs) (NOLA3), mRNA.	go_component: small nucleolar ribonucleoprotein complex [goid 0005732] [evidence TAS] [pmid 9843512]; go_function: molecular_function unknown [goid 0005554] [evidence ND] [pmid 9843512]; go_process: pseudouridine synthesis [goid 0001522] [evidence NAS] [pmid 9843512]	1093.7	259.3	282.4	704.7	906.9	586.6	854.6	1833.4	797	975.5	1171.1	741.1	486.5	479.6	2383.9	235.5	237	1702.5	2224.4	312.1
665	GI_7657344-S	NM_014341.1	MTCH1	Homo sapiens mitochondrial carrier homolog 1 (C. elegans) (MTCH1), nuclear gene encoding mitochondrial protein, mRNA.		1025	347.4	394.2	791.6	849.5	419.5	866.5	1832.9	801.3	1048.4	1495.1	812.8	564.4	502.7	2195.3	261.4	248.6	1696	1760.9	342.4
666	GI_23111040-A	NM_152827.1	SNX3	Homo sapiens sorting nexin 3 (SNX3), transcript variant 2, mRNA.	go_component: peripheral plasma membrane protein [goid 0000157] [evidence NR]; go_process: endocytosis [goid 0006897] [evidence E] [pmid 9819414]	680	708.4	889	569.6	791	488.3	665.3	1140	586.8	768.3	756.2	515.8	754.7	588.4	1645	267.9	246.1	3166.4	1997.8	1026.3
667	GI_9257219-S	NM_000804.2	FOLR3	Homo sapiens folate receptor 3 (gamma) (FOLR3), mRNA.	go_component: membrane fraction [goid 0005624] [evidence TAS] [pmid 8110752]; go_component: extrinsic to membrane [goid 0019898] [evidence TAS]; go_function: folic acid binding [goid 0005542] [evidence TAS] [pmid 8110752]; go_function: GPI-anchored membrane-bound receptor [goid 0015025] [evidence TAS] [pmid 8110752]; go_function: receptor activity [goid 0004872] [evidence IEA]; go_process: folate…	1904.6	334.5	375.5	371.3	358.3	789.5	1588.9	451.8	348.5	308.9	740.3	324.2	476.8	452.7	907	51.2	47.7	663.2	6512.5	1141.7
668	GI_20127481-S	NM_005601.2	NKG7	Homo sapiens natural killer cell group 7 sequence (NKG7), mRNA.	go_component: integral to plasma membrane [goid 0005887] [evidence TAS] [pmid 8458737]	586.1	352.2	380	1105.7	1044.1	407.6	525.5	999.5	765.2	1878.7	687.6	694.1	578.5	530.7	1973.9	251.8	264.6	3336.9	1465	315.6
669	GI_8923856-S	NM_018447.1	LOC55831	Homo sapiens 30 kDa protein (LOC55831), mRNA.		742.1	623.9	708.9	582.9	870.1	726.5	619	448.6	827.6	611	539.5	396.2	522.5	469.1	4000.6	425.5	397.1	2505.1	1495.1	597
670	GI_34147397-S	NM_031443.2	CCM2	Homo sapiens cerebral cavernous malformation 2 (CCM2), mRNA.		1176.3	263.4	272.7	1025.4	1151.7	546.9	908.8	1648	827.5	1070.9	1009.1	1223.3	295.1	303.1	2593.8	142	129.6	1505.6	1622	334.6
671	GI_27754193-S	NM_173713.1	MTND5	Homo sapiens NADH dehydrogenase 5 (MTND5), mRNA.	go_component: respiratory chain complex I (sensu Eukarya) [goid 0005747] [evidence NAS] [pmid 3921850]; go_component: NADH dehydrogenase complex (ubiquinone) (sensu Eukarya) [goid 0005748] [evidence IEA]; go_component: mitochondrion [goid 0005739] [evidence IEA]; go_function: NADH dehydrogenase (ubiquinone) activity [goid 0008137] [evidence NAS] [pmid 9878551]; go_function: oxidoreductase activit…	877.2	203.2	232.3	446.4	805.7	256.4	729	942.3	667	854.8	2178.1	879.8	329.8	275.4	3898.8	314.4	285.2	1537.7	2023.8	306.2
672	GI_29742588-S	XM_029084.5	FLJ21438	Homo sapiens hypothetical protein FLJ21438 (FLJ21438), mRNA.		825.9	313	378.3	1202.2	1038.2	409.8	727.2	1170.8	655.4	1017.6	741.4	781	424.7	402.2	3216.4	224.2	214.3	2401.9	1568	287.5
673	GI_18641371-S	NM_022555.3	HLA-DRB3	Homo sapiens major histocompatibility complex, class II, DR beta 3 (HLA-DRB3), mRNA.	go_component: integral to plasma membrane [goid 0005887] [evidence NR]; go_function: class II major histocompatibility complex antigen [goid 0003821] [evidence NR]; go_process: signal transduction [goid 0007165] [evidence NR]	113.7	255	291.7	1145	1218.9	119.2	120.8	145.1	136.9	201.7	1345.8	277.8	414.7	358	4477.4	25.7	26.3	4242.9	2912.3	132.6
674	GI_42476014-S	NM_024829.2	FLJ22662	Homo sapiens hypothetical protein FLJ22662 (FLJ22662), mRNA.		1364.7	285.7	336.4	756	1121	456.2	1236.5	1571.3	837.4	800.7	1342.4	750.7	498.8	463.6	1958.5	148.1	140.4	1407.1	2156.2	320.8
675	GI_8923906-A	NM_018694.1	ARL6IP4	Homo sapiens ADP-ribosylation-like factor 6 interacting protein 4 (ARL6IP4), mRNA.	go_component: nucleus [goid 0005634] [evidence P] [pmid 10708573]; go_process: RNA splicing [goid 0008380] [evidence P] [pmid 10708573]	967.8	281.1	314.8	972.3	923.6	396.9	726	1154	916.3	1305.2	871.8	942.8	344.9	313.7	3219.8	140.7	155.3	1724.8	1937.2	319.6
676	GI_37541039-S	XM_290509.3	LOC338692	Homo sapiens hypothetical protein LOC338692 (LOC338692), mRNA.		1229.3	265.1	308.7	1164.7	1027.7	554.8	999	2028.2	870.1	1384.1	643.3	1057	228.7	200.8	2439.7	99.3	91.5	1318	1571.7	422.4
677	GI_20127658-S	NM_033101.2	LGALS12	Homo sapiens lectin, galactoside-binding, soluble, 12 (galectin 12) (LGALS12), mRNA.		1081.8	250	303.2	864	809.4	724.7	686.1	441.5	810	598.1	675.9	592	233	110.1	4250.3	185.8	116.6	2274.5	2422.4	466.6
678	GI_5174460-S	NM_006018.1	HM74	Homo sapiens putative chemokine receptor (HM74), mRNA.	go_component: integral to plasma membrane [goid 0005887] [evidence TAS] [pmid 7505609]; go_function: G-protein coupled receptor activity [goid 0004930] [evidence P] [pmid 9205127]; go_function: rhodopsin-like receptor activity [goid 0001584] [evidence IEA]; go_function: purinergic nucleotide receptor activity, G-protein coupled [goid 0045028] [evidence IEA]; go_process: G-protein coupled receptor…	1071.8	433.2	500.2	889.6	1036.4	637.7	1001.2	1431.9	370.4	601.1	1104.1	560.8	617.4	565.3	1551	180.5	164.3	1799.6	2955.6	354.7
679	GI_15431302-S	NM_000661.2	RPL9	Homo sapiens ribosomal protein L9 (RPL9), mRNA.	go_component: ribosome [goid 0005840] [evidence TAS] [pmid 8597601]; go_component: intracellular [goid 0005622] [evidence IEA]; go_function: structural protein of ribosome [goid 0003735] [evidence P] [pmid 8597601]; go_function: RNA binding [goid 0003723] [evidence TAS] [pmid 8597601]; go_function: structural constituent of ribosome [goid 0003735] [evidence TAS] [pmid 8597601]; go_process: protei…	578.2	337.4	452.8	1005.7	700.2	634.4	437	3598.3	1128.8	1602.5	944.2	411.1	274.7	89.3	1360.6	110.7	93	2250.9	1508.9	299.7
680	GI_39725700-S	NM_014063.4	HIP-55	Homo sapiens src homology 3 domain-containing protein HIP-55 (HIP-55), mRNA.	go_component: intracellular [goid 0005622] [evidence IEA]; go_function: enzyme activator activity [goid 0008047] [evidence E] [pmid 10567356]; go_function: protein binding [goid 0005515] [evidence E] [pmid 10567356]; go_function: actin binding [goid 0003779] [evidence IEA]; go_process: activation of JUNK [goid 0007257] [evidence E] [pmid 10567356]	948.7	277.6	321.6	920.3	1249.5	490.6	789.7	1520.7	761.1	784.2	1129.7	760.2	401.5	401.1	2076	179.1	177.5	2169.7	2140.8	305.4
681	GI_34147559-S	NM_005216.3	DDOST	Homo sapiens dolichyl-diphosphooligosaccharide-protein glycosyltransferase (DDOST), mRNA.	go_component: endoplasmic reticulum membrane [goid 0005789] [evidence IEA]; go_component: integral to membrane [goid 0016021] [evidence IEA]; go_component: endoplasmic reticulum [goid 0005783] [evidence P] [pmid 9367678]; go_function: dolichyl-diphosphooligosaccharide-protein glycosyltransferase activity [goid 0004579] [evidence TAS] [pmid 9367678]; go_function: transferase activity [goid 0016740…	986.9	348.6	383.6	968.2	982.2	485.4	839.8	1409.6	800.1	981.1	1115	844.7	371.5	330.5	2736.2	214.4	191.8	1673.8	1800.4	262.4
682	GI_45433498-S	NM_032283.1	ZDHHC18	Homo sapiens zinc finger, DHHC domain containing 18 (ZDHHC18), mRNA.	go_component: integral to membrane [goid 0016021] [evidence IEA]; go_component: nucleus [goid 0005634] [evidence IEA]; go_function: zinc ion binding [goid 0008270] [evidence IEA]; go_function: transcription factor activity [goid 0003700] [evidence IEA]; go_process: regulation of transcription, DNA-dependent [goid 0006355] [evidence IEA]	1030.7	247.4	356.1	776	840.9	563.8	684	894.3	715.9	651.9	1031.7	634.8	351.8	278.7	3426.6	204.3	136.3	2130.6	2424.3	318.2
683	GI_29568092-S	NM_033546.2	MRLC2	Homo sapiens myosin regulatory light chain MRLC2 (MRLC2), mRNA.	go_function: calcium ion binding [goid 0005509] [evidence IEA]	867.5	464.1	499.3	850.6	994.9	637.7	726.9	1212.7	778	1135.5	1031.1	675.3	526.7	472.6	2248.9	244.2	235.2	2163.5	1609	314.6
684	GI_31543652-S	NM_003134.2	SRP14	Homo sapiens signal recognition particle 14kDa (homologous Alu RNA binding protein) (SRP14), mRNA.	go_component: signal recognition particle [goid 0005786] [evidence TAS] [pmid 2557625]; go_component: cytoplasm [goid 0005737] [evidence TAS] [pmid 8196634]; go_function: 7S RNA binding [goid 0008312] [evidence TAS] [pmid 8196634]; go_function: RNA binding [goid 0003723] [evidence P]; go_process: cotranslational membrane targeting [goid 0006613] [evidence TAS] [pmid 2557625]; go_process: protein …	739.7	469.1	510.3	768.9	1101.6	605.2	673.8	1341.1	1215.1	1103.3	845.3	464.8	566.3	528.4	1710.6	224.9	218.5	2720.8	1541.7	329.2
685	GI_21361667-S	NM_018174.3	VCY2IP1	Homo sapiens VCY2 interacting protein 1 (VCY2IP1), mRNA.		897.9	93.3	95.4	798.9	724.3	468.1	502.3	501.9	1019.7	479.2	1122.3	752.4	172.8	131.4	5912.2	128.3	114.7	1520.1	1499	713.6
686	GI_33519457-A	NM_182763.1	MCL1	Homo sapiens myeloid cell leukemia sequence 1 (BCL2-related) (MCL1), transcript variant 2, mRNA.	go_process: apoptotic program [goid 0008632] [evidence P] [pmid 7682708]; go_process: heat shock response [goid 0006951] [evidence P] [pmid 8790944]; go_process: development [goid 0007275] [evidence P] [pmid 8790944]	916.6	272.6	332.7	655.3	873.6	486.1	746	2048.2	877.2	1077.4	992.6	622.8	483.2	419.5	1953.9	197.2	185.8	2075.4	2067.5	342.5
687	GI_7706664-S	NM_016145.1	PTD008	Homo sapiens PTD008 protein (PTD008), mRNA.	go_component: integral to membrane [goid 0016021] [evidence IEA]; go_function: molecular_function unknown [goid 0005554] [evidence IEA]	976	371.4	423.9	868.1	708.3	639.7	795.8	1154.1	718.4	1025.8	921.1	845.7	401.5	372.8	2743.9	190.9	196.5	1832.9	2079.9	340.6
688	GI_21361836-S	NM_020362.2	HT014	Homo sapiens HT014 (HT014), mRNA.		433.1	596.8	707.9	365.5	458.6	304.7	353.4	372.9	395.6	349.3	394.3	254.7	888	769.6	864.9	396.8	385.1	7375.2	1008.8	891.3
689	GI_5803055-S	NM_006762.1	LAPTM5	Homo sapiens Lysosomal-associated multispanning membrane protein-5 (LAPTM5), mRNA.	go_component: lysosome [goid 0005764] [evidence TAS] [pmid 8661146]; go_component: integral to plasma membrane [goid 0005887] [evidence TAS] [pmid 8661146]	1153.7	229	259.8	761.7	998.9	492.6	991.8	1729.2	937.7	1153.4	1037.4	943.6	271.5	233.3	2731	147.2	132.8	1410.8	1562.9	310.5
690	GI_18201877-S	NM_080821.1	C20orf108	Homo sapiens chromosome 20 open reading frame 108 (C20orf108), mRNA.	go_component: integral to membrane [goid 0016021] [evidence IEA]	735.9	470.7	500	411.5	937	387	593.5	713.8	591	569.7	578.1	499.4	515.5	476	2853.1	235.8	232.6	2781.1	1319.6	2054.5
691	GI_37544141-S	XM_352094.1	LOC376156	Homo sapiens similar to 60S ribosomal protein L11 (LOC376156), mRNA.		664.1	122.3	144.9	1025	1271.2	506.3	523.6	2202.4	1437.6	1295.3	838.5	619.1	101.2	41.8	3354.2	58	47.1	1784.1	1014.4	403.1
692	GI_33667066-S	NM_014266.3	HCST	Homo sapiens hematopoietic cell signal transducer (HCST), mRNA.	go_component: integral to plasma membrane [goid 0005887] [evidence NR]; go_function: SH3/SH2 adaptor protein activity [goid 0005070] [evidence E] [pmid 10426994]; go_process: humoral immune response [goid 0006959] [evidence P] [pmid 10426994]; go_process: cell surface receptor linked signal transduction [goid 0007166] [evidence E] [pmid 10426994]; go_process: protein complex assembly [goid 000646…	956.8	229.1	268.5	939.8	841.9	569	773.5	952.7	671.9	1203.3	934.9	947.1	308.5	330.6	3510	184.6	181.5	1806.9	1499.9	317.1
693	GI_18379347-S	NM_003105.3	SORL1	Homo sapiens sortilin-related receptor, L(DLR class) A repeats-containing (SORL1), mRNA.	go_component: integral to plasma membrane [goid 0005887] [evidence TAS] [pmid 9157966]; go_function: internalization receptor activity [goid 0015029] [evidence TAS] [pmid 8940146]; go_function: transmembrane receptor activity [goid 0004888] [evidence TAS] [pmid 9157966]; go_function: protein transporter activity [goid 0008565] [evidence IEA]; go_function: lipid transporter activity [goid 0005319]…	943.6	287.7	305.1	629.4	1230.1	484.7	914.3	1128.2	672.2	804.3	1422.5	821.2	453.8	465.6	1909.8	333.5	334.6	1919	2015.7	347
694	GI_31543416-S	NM_020360.2	PLSCR3	Homo sapiens phospholipid scramblase 3 (PLSCR3), mRNA.	go_component: integral to membrane [goid 0016021] [evidence IEA]; go_component: plasma membrane [goid 0005886] [evidence NAS]; go_function: calcium ion binding [goid 0005509] [evidence NAS]; go_function: phospholipid scramblase activity [goid 0017128] [evidence NAS]; go_process: phospholipid scrambling [goid 0017121] [evidence NAS]	927.9	334.7	354.3	828.8	1024.7	480.8	751.5	1010	757.7	937.9	1011.7	867.1	355.2	323.6	2937.1	184.9	182.1	2035.9	1842.7	271.4
695	GI_32261312-S	NM_006743.2	RBM3	Homo sapiens RNA binding motif protein 3 (RBM3), mRNA.	go_function: RNA binding [goid 0003723] [evidence P] [pmid 8634703]; go_process: RNA processing [goid 0006396] [evidence P] [pmid 8634703]	700.7	174.6	205	614.1	849.7	279.2	494.8	1416.5	720.9	1127.1	992.3	839.8	220	160.9	4645.2	90.7	79.1	1828.7	1597.9	374.8
696	GI_23510363-A	NM_153048.1	FYN	Homo sapiens FYN oncogene related to SRC, FGR, YES (FYN), transcript variant 3, mRNA.	go_function: protein-tyrosine kinase activity [goid 0004713] [evidence P]; go_process: learning [goid 0007612] [evidence P]; go_process: protein kinase cascade [goid 0007243] [evidence E]; go_process: protein amino acid phosphorylation [goid 0006468] [evidence P] [pmid 3526330]; go_process: feeding behavior [goid 0007631] [evidence E]	752.7	327.5	376.7	656.4	932.2	262.7	689.6	1166.4	676.7	1120.4	1210.9	689.3	419.8	364.6	2925.8	181.6	188	2395.1	1771.9	301.7
697	GI_4502564-S	NM_001749.1	CAPNS1	Homo sapiens calpain, small subunit 1 (CAPNS1), mRNA.	go_function: calpain activity [goid 0004198] [evidence TAS] [pmid 8702541]; go_function: calcium ion binding [goid 0005509] [evidence IEA]; go_process: positive regulation of cell proliferation [goid 0008284] [evidence TAS] [pmid 8702541]	871	236	306.3	610.7	918.1	346.7	692.4	678.4	883.4	853.5	1345.3	731.3	473.5	417.5	3144.1	203.1	226.5	2217.5	1872	361.1
698	GI_4504614-S	NM_000596.1	IGFBP1	Homo sapiens insulin-like growth factor binding protein 1 (IGFBP1), mRNA.	go_component: extracellular space [goid 0005615] [evidence TAS] [pmid 2454104]; go_function: insulin-like growth factor binding [goid 0005520] [evidence TAS] [pmid 2454104]; go_process: signal transduction [goid 0007165] [evidence TAS] [pmid 2454104]; go_process: regulation of cell growth [goid 0001558] [evidence IEA]	779.2	181.1	268.4	1218.9	1080.7	1127.3	508.6	842.8	1178.1	691.3	757	866.3	139.1	70.9	2392.5	86.9	52.4	2698.4	1509.1	938.3
699	GI_16357476-S	NM_004359.1	CDC34	Homo sapiens cell division cycle 34 (CDC34), mRNA.	go_component: nucleus [goid 0005634] [evidence NAS] [pmid 8248134]; go_function: ubiquitin conjugating enzyme activity [goid 0004840] [evidence NAS] [pmid 8248134]; go_function: ubiquitin-protein ligase activity [goid 0004842] [evidence NAS] [pmid 8248134]; go_function: ligase activity [goid 0016874] [evidence IEA]; go_process: DNA replication checkpoint [goid 0000076] [evidence E] [pmid 8248134]…	740.8	359.5	373.9	603	1069.7	403.6	587.5	479.2	846.7	672	864.7	526.9	416.4	331.2	2661	405.4	363.8	3447.5	1322.2	909
700	GI_38524621-S	NM_015033.1	FNBP1	Homo sapiens formin binding protein 1 (FNBP1), mRNA.	go_component: nucleus [goid 0005634] [evidence IEA]; go_function: DNA binding [goid 0003677] [evidence IEA]; go_process: regulation of transcription, DNA-dependent [goid 0006355] [evidence IEA]; go_process: signal transduction [goid 0007165] [evidence IEA]	891.8	345.3	371.9	958.7	1050.5	429.7	744.2	1308.5	625.6	874	1254.8	645	418.2	386.8	2969.6	171.8	164.7	1900.2	1537.7	332.3
701	GI_22748750-S	NM_152346.1	MGC34680	Homo sapiens hypothetical protein MGC34680 (MGC34680), mRNA.		1304.9	312.9	323.4	871.4	1154.4	440	1169.5	1696.3	648	793.3	1080.5	797	241.6	266.3	2573.4	155	142.7	1241.8	1834.4	291.4
702	GI_23510443-S	NM_006573.3	TNFSF13B	Homo sapiens tumor necrosis factor (ligand) superfamily, member 13b (TNFSF13B), mRNA.	go_component: soluble fraction [goid 0005625] [evidence TAS] [pmid 10908663]; go_component: integral to plasma membrane [goid 0005887] [evidence NR]; go_function: receptor binding [goid 0005102] [evidence E]; go_function: tumor necrosis factor receptor binding [goid 0005164] [evidence IEA]; go_process: positive regulation of cell proliferation [goid 0008284] [evidence TAS] [pmid 10359578]; go_pro…	863.8	300.8	339.4	588.8	1274.7	380.2	775.4	1497.1	736.7	932.4	1196.8	969.3	611.3	479.9	1748.4	236.6	209.1	1467.3	2411.4	293.3
703	GI_41150493-S	XM_370924.1	LOC388199	Homo sapiens LOC400486 (LOC388199), mRNA.		1043.9	118.9	173.6	754.6	490.4	549.7	473	294	812.2	397.2	455	488.6	92.3	42	6454.7	101.8	42.5	2091.1	2067.6	345
704	GI_40789088-S	NM_173474.2	NTAN1	Homo sapiens N-terminal asparagine amidase (NTAN1), mRNA.	go_function: hydrolase activity [goid 0016787] [evidence IEA]	962.7	293.8	339	841.6	763	668.9	561.8	668.9	765.4	655.2	612.6	669.1	289.2	206.8	3341.1	204.5	132.5	2407.6	2384.5	516.9
705	GI_40255103-S	NM_152363.2	FLJ39369	Homo sapiens hypothetical protein FLJ39369 (FLJ39369), mRNA.	go_component: nuclear membrane [goid 0005635] [evidence IEA]	708.7	248.3	267.5	599.1	734.4	293.2	493.7	1114.3	740	1097.5	1024.4	936.9	299.1	259.2	3430.7	145.6	135.5	2148.4	2215.9	372.2
706	GI_31543651-S	NM_003563.2	SPOP	Homo sapiens speckle-type POZ protein (SPOP), mRNA.	go_component: nucleus [goid 0005634] [evidence TAS] [pmid 9414087]; go_function: protein binding [goid 0005515] [evidence IEA]; go_process: mRNA processing [goid 0006397] [evidence TAS] [pmid 9414087]	795.6	295.7	357.8	867.6	893.2	416.9	734.1	1104.8	711.5	899.4	914.5	637	513.2	445.6	2603	262.3	253.3	2382	1846.3	328.7
707	GI_24234684-I	NM_006597.3	HSPA8	Homo sapiens heat shock 70kDa protein 8 (HSPA8), transcript variant 1, mRNA.	go_component: intracellular [goid 0005622] [evidence NAS] [pmid 8713105]; go_function: ATP binding [goid 0005524] [evidence IEA]; go_function: heat shock protein activity [goid 0003773] [evidence IEA]; go_function: non-chaperonin molecular chaperone ATPase activity [goid 0008571] [evidence NAS] [pmid 8530083]; go_process: protein folding [goid 0006457] [evidence NAS] [pmid 8530083]	529.6	444.3	517.8	752.2	992.5	353.2	597.8	1303.4	589.7	879.4	1405.1	463.1	598.6	506.8	1677.7	274.7	261	3120	1758.5	235.5
708	GI_10800147-S	NM_021067.1	KIAA0186	Homo sapiens KIAA0186 gene product (KIAA0186), mRNA.		800.7	141.2	152.9	723.5	852	400.1	657.5	2143.2	703.2	1288.5	944.1	1134.4	137.7	105.8	3353.8	73.4	71.8	1635	1485.8	421.9
709	GI_34452691-A	NM_016208.2	VPS28	Homo sapiens vacuolar protein sorting 28 (yeast) (VPS28), transcript variant 1, mRNA.	go_function: protein transporter activity [goid 0008565] [evidence IEA]; go_process: intracellular protein transport [goid 0006886] [evidence IEA]	1195.1	205.3	231.1	663.7	951.1	445.5	966.5	707.9	836.2	837.9	954.1	619.9	545.3	554.8	3108.6	242.5	233.8	1612.9	1754.9	547.5
710	GI_20555643-S	XM_166376.1	KIAA1949	Homo sapiens KIAA1949 protein (KIAA1949), mRNA.		935.3	188	215.5	610.2	981.8	302.7	749.2	1130.8	806.9	1037.2	1411.9	901.2	311.6	274.6	3018.8	171.5	147.9	1723.8	1900.3	394.9
711	GI_5803067-S	NM_006866.1	LILRA2	Homo sapiens leukocyte immunoglobulin-like receptor, subfamily A (with TM domain), member 2 (LILRA2), mRNA.	go_component: integral to membrane [goid 0016021] [evidence IEA]; go_function: antigen binding [goid 0003823] [evidence P] [pmid 9548455]; go_function: receptor activity [goid 0004872] [evidence IEA] [pmid 9548455]; go_process: defense response [goid 0006952] [evidence P] [pmid 9548455]; go_process: signal transduction [goid 0007165] [evidence P] [pmid 9548455]; go_process: immune response [goid …	1254.5	160.1	187.7	598.5	910.5	318.8	967.7	2029.7	847.4	950.7	1397.5	1194.4	262.7	231.3	2926.3	123	107	916.9	1531.4	286.7
712	GI_4504106-S	NM_002085.1	GPX4	Homo sapiens glutathione peroxidase 4 (phospholipid hydroperoxidase) (GPX4), mRNA.	go_component: mitochondrion [goid 0005739] [evidence TAS] [pmid 9705830]; go_function: glutathione peroxidase activity [goid 0004602] [evidence TAS] [pmid 9705830]; go_function: electron transporter activity [goid 0005489] [evidence TAS] [pmid 8039723]; go_function: selenium binding [goid 0008430] [evidence IEA]; go_function: oxidoreductase activity [goid 0016491] [evidence IEA]; go_function: per…	693.9	321.8	360.6	612.5	639.3	370	726.7	1006.9	801.6	842.5	969.4	708.5	273.9	281.9	3414.6	243.5	229.5	2592.3	1748.9	333.8
713	GI_31343330-S	NM_175738.2	RAB37	Homo sapiens RAB37, member RAS oncogene family (RAB37), mRNA.	go_function: RAS small monomeric GTPase activity [goid 0003930] [evidence IEA]; go_function: Rho small monomeric GTPase activity [goid 0003931] [evidence IEA]; go_function: GTP binding [goid 0005525] [evidence IEA]; go_function: RAB small monomeric GTPase activity [goid 0003928] [evidence IEA]; go_function: protein transporter activity [goid 0008565] [evidence IEA]; go_process: small GTPase media…	847.9	267.1	308	738.1	1129.1	454.6	724	1646.2	721.3	1152.2	916.2	811.4	352.9	333	2464	198.6	188.7	1697.4	1900.6	316.2
714	GI_4507466-S	NM_000358.1	TGFBI	Homo sapiens transforming growth factor, beta-induced, 68kDa (TGFBI), mRNA.	go_component: extracellular matrix [goid 0005578] [evidence IEA]; go_component: extracellular space [goid 0005615] [evidence TAS] [pmid 1388724]; go_function: integrin binding [goid 0005178] [evidence TAS] [pmid 1388724]; go_function: tumor suppressor [goid 0008181] [evidence TAS] [pmid 8024701]; go_function: structural molecule activity [goid 0005198] [evidence IEA]; go_function: cell adhesion m…	1397.9	290.2	300.2	921.3	532.9	325.4	1099.3	1043.9	758.6	815.4	1038.7	727.1	367.6	340.6	1966.9	207.1	182.9	1884.4	2688.6	269.1
715	GI_20302151-S	NM_004132.2	HABP2	Homo sapiens hyaluronan binding protein 2 (HABP2), mRNA.	go_component: extracellular space [goid 0005615] [evidence TAS] [pmid 8827452]; go_function: glycosaminoglycan binding [goid 0005539] [evidence TAS] [pmid 8827452]; go_function: trypsin activity [goid 0004295] [evidence IEA]; go_function: peptidase activity [goid 0008233] [evidence IEA]; go_function: chymotrypsin activity [goid 0004263] [evidence IEA]; go_process: cell adhesion [goid 0007155] [ev…	687	251.6	314.9	566.9	710.8	459.9	673.1	334	798.8	495.9	823.7	539.4	275.9	290.6	4016.1	233	230.8	2425.3	2573.4	441.5
716	GI_40255030-S	NM_024736.4	FLJ12150	Homo sapiens hypothetical protein FLJ12150 (FLJ12150), mRNA.		872.6	201	243.9	609.4	697.6	437.5	659.7	588.7	812.7	616.6	883.2	604	252.4	188.8	4679	187.8	166.7	1891.9	2140.7	395.1
717	GI_15431292-S	NM_002948.2	RPL15	Homo sapiens ribosomal protein L15 (RPL15), mRNA.	go_component: ribosome [goid 0005840] [evidence TAS] [pmid 9582194]; go_component: intracellular [goid 0005622] [evidence IEA]; go_function: structural protein of ribosome [goid 0003735] [evidence P] [pmid 9582194]; go_function: RNA binding [goid 0003723] [evidence TAS] [pmid 9582194]; go_function: structural constituent of ribosome [goid 0003735] [evidence TAS] [pmid 9582194]; go_process: protei…	853.3	401.5	461.6	949.2	827.8	474.6	766.4	1679	842	964.8	1185.7	564.7	445.3	427.1	1240.6	227.7	196.1	2231.9	2131.3	257.4
718	GI_5454089-S	NM_006280.1	SSR4	Homo sapiens signal sequence receptor, delta (translocon-associated protein delta) (SSR4), mRNA.	go_component: endoplasmic reticulum [goid 0005783] [evidence IEA]; go_component: integral to membrane [goid 0016021] [evidence IEA]; go_component: translocon [goid 0005784] [evidence NAS] [pmid 9286695]; go_function: calcium ion binding [goid 0005509] [evidence NAS]; go_process: intracellular protein transport [goid 0006886] [evidence NAS]	764.1	274.2	319.7	775.5	809.7	564.3	636.5	1282.1	770.6	1118.6	1162.3	880.9	340.4	341.7	2618	203.7	212.2	1891.5	1835.7	300.5
719	GI_4758343-S	NM_004106.1	FCER1G	Homo sapiens Fc fragment of IgE, high affinity I, receptor for; gamma polypeptide (FCER1G), mRNA.	go_component: integral to plasma membrane [goid 0005887] [evidence TAS] [pmid 1535625]; go_component: plasma membrane [goid 0005886] [evidence E] [pmid 1535625]; go_function: receptor signaling protein activity [goid 0005057] [evidence NR]; go_function: transmembrane receptor activity [goid 0004888] [evidence IEA]; go_function: IgE binding [goid 0019863] [evidence IEA]; go_process: immune respons…	896.9	407.1	466	672.6	1015.7	390.8	709.4	1073.1	627.8	1086.2	1304.3	820.6	818.6	798.3	1860.5	244.4	251.2	1495.6	1691.4	303.7
720	GI_37540588-S	XM_353345.1	LOC375391	Homo sapiens hypothetical gene supported by BC038466; BC047038 (LOC375391), mRNA.		1031.3	193.5	224.2	1043.7	750.7	714.2	760.6	1389.7	694.2	1405.7	1047	1116.7	227.3	218	2402	107.9	108.9	1161	1964.6	336.5
721	GI_21264582-S	NM_005723.2	TM4SF9	Homo sapiens transmembrane 4 superfamily member 9 (TM4SF9), mRNA.	go_component: integral to membrane [goid 0016021] [evidence TAS] [pmid 9714763]; go_process: mystery cell fate differentiation (sensu Drosophila) [goid 0008583] [evidence TAS] [pmid 9714763]; go_process: cell adhesion [goid 0007155] [evidence NR]; go_process: cell motility [goid 0006928] [evidence NR]; go_process: cell proliferation [goid 0008283] [evidence NR]	743.4	334.3	354.2	525.4	862.7	420.1	669.1	609	822.4	686	434.6	555.5	366.1	333.3	2581.2	125.6	126	3034.1	2257.3	1042
722	GI_24475653-S	NM_021935.2	PROK2	Homo sapiens prokineticin 2 (PROK2), mRNA.	go_component: cellular_component unknown [goid 0008372] [evidence ND]; go_function: molecular_function unknown [goid 0005554] [evidence ND]; go_process: neuropeptide signaling pathway [goid 0007218] [evidence IEA]; go_process: biological_process unknown [goid 0000004] [evidence ND]; go_process: rhythmic behavior [goid 0007622] [evidence IEA]	592.7	390.1	458.1	581.1	911.5	675.1	479	1359.8	494.3	623.7	1526	658.9	401.5	386	1297.7	108.7	119.1	2630.8	2773.3	371.3
723	GI_21359859-S	NM_002823.2	PTMA	Homo sapiens prothymosin, alpha (gene sequence 28) (PTMA), mRNA.	go_component: nucleus [goid 0005634] [evidence TAS] [pmid 10854063]; go_process: transcription [goid 0006350] [evidence TAS] [pmid 10854063]; go_process: regulation of cell cycle [goid 0000074] [evidence NR]; go_process: development [goid 0007275] [evidence NR]	674.8	483.9	549.4	599.2	657	429.3	612.6	997.8	563.7	672.4	936.3	550.1	413.9	386.4	2539.6	240.3	233.6	2468.5	2577.6	216.5
724	GI_45359857-S	NM_002086.3	GRB2	Homo sapiens growth factor receptor-bound protein 2 (GRB2), transcript variant 1, mRNA.	go_function: SH3/SH2 adaptor protein activity [goid 0005070] [evidence TAS] [pmid 8253073]; go_process: epidermal growth factor receptor signaling pathway [goid 0007173] [evidence TAS] [pmid 1322798]; go_process: RAS protein signal transduction [goid 0007265] [evidence TAS] [pmid 8253073]; go_process: cell shape and cell size control [goid 0007148] [evidence E]; go_process: cell-cell signaling [g…	1083.5	328.9	381.4	698.7	932.2	452.2	743	1386.7	733.6	977.1	814.7	699	343	337.6	1902.9	144.9	148.6	2021.6	2348.8	323.7
725	GI_34147693-S	NM_032213.3	FLJ21977	Homo sapiens hypothetical protein FLJ21977 (FLJ21977), mRNA.		810	139.3	212.1	373.8	437.5	431.7	425.3	589.6	525.8	475.8	476.3	429.9	245.7	161.9	6307.6	136.3	113.6	2252.7	1857.1	346.5
726	GI_5453596-S	NM_006135.1	CAPZA1	Homo sapiens capping protein (actin filament) muscle Z-line, alpha 1 (CAPZA1), mRNA.	go_component: F-actin capping protein complex [goid 0008290] [evidence TAS] [pmid 9331217]; go_component: actin cytoskeleton [goid 0015629] [evidence E] [pmid 7665558]; go_function: actin binding [goid 0003779] [evidence E] [pmid 7665558]; go_function: structural constituent of cytoskeleton [goid 0005200] [evidence IEA]; go_function: F-actin capping activity [goid 0003782] [evidence IEA]; go_proc…	764.4	154.9	214.4	1030	745.5	384.3	605.6	2908.9	869.4	1393.6	851.1	601.4	253.5	34.4	895.1	75.8	66	2155.6	2374	279.8
727	GI_4504444-A	NM_002136.1	HNRPA1	Homo sapiens heterogeneous nuclear ribonucleoprotein A1 (HNRPA1), transcript variant 1, mRNA.	go_component: nucleoplasm [goid 0005654] [evidence TAS] [pmid 8521471]; go_component: cytoplasm [goid 0005737] [evidence TAS] [pmid 8521471]; go_component: ribonucleoprotein complex [goid 0030529] [evidence IEA]; go_component: heterogeneous nuclear ribonucleoprotein complex [goid 0030530] [evidence TAS]; go_function: heterogeneous nuclear ribonucleoprotein [goid 0008436] [evidence TAS] [pmid 8521…	770.3	381.2	419.7	618.8	847.6	371.7	653.3	602.3	679.2	772	1025.5	572.6	485.9	450.1	2914.4	285.6	277	2401.6	1892.7	235.9
728	GI_15431296-A	NM_000977.2	RPL13	Homo sapiens ribosomal protein L13 (RPL13), transcript variant 1, mRNA.	go_component: cytosolic ribosome [goid 0005830] [evidence P] [pmid 9582194]; go_component: cytosolic ribosome (sensu Eukarya) [goid 0005830] [evidence TAS] [pmid 9582194]; go_component: intracellular [goid 0005622] [evidence IEA]; go_function: structural protein of ribosome [goid 0003735] [evidence P] [pmid 9582194]; go_function: RNA binding [goid 0003723] [evidence TAS] [pmid 9582194]; go_functi…	722.2	407.2	427.7	769.9	778.2	588.3	656.1	1079.6	895.4	815.7	1064.8	685.9	350.9	300.8	2431.9	250	243.8	2375.5	1587.1	220.3
729	GI_13375925-S	NM_024667.1	FLJ12750	Homo sapiens hypothetical protein FLJ12750 (FLJ12750), mRNA.		1178.9	267	310	1056.8	841.6	523.5	876.7	1520.1	659.6	920.1	851.4	802	322.5	334.4	2405.6	113.8	130.6	1698.7	1466.3	363.5
730	GI_4758605-S	NM_004517.1	ILK	Homo sapiens integrin-linked kinase (ILK), mRNA.	go_component: peripheral plasma membrane protein [goid 0000157] [evidence E] [pmid 8538749]; go_function: protein serine/threonine kinase activity [goid 0004674] [evidence TAS] [pmid 8538749]; go_function: protein-tyrosine kinase activity [goid 0004713] [evidence IEA]; go_function: ATP binding [goid 0005524] [evidence IEA]; go_function: transferase activity [goid 0016740] [evidence IEA]; go_proce…	852.2	294.7	325	665.1	974.7	376.6	760.4	1381.7	628.5	1006.4	1139.8	902.2	406.4	352.8	2675	182.6	169.5	1598.1	1629.2	316.7
731	GI_12545396-I	NM_022308.1	ICA1	Homo sapiens islet cell autoantigen 1, 69kDa (ICA1), transcript variant 3, mRNA.	go_component: cytoplasm [goid 0005737] [evidence E] [pmid 8326004]	674.1	100.6	118.1	593	706.1	314.5	505.8	1654.3	692.7	1025.9	721.3	1103.5	111.1	62.3	4532.8	46.8	48.5	1623.5	1649.6	341.4
732	GI_41872408-S	NM_002704.2	PPBP	Homo sapiens pro-platelet basic protein (chemokine (C-X-C motif) ligand 7) (PPBP), mRNA.	go_component: extracellular [goid 0005576] [evidence IEA]; go_function: glucose transporter activity [goid 0005355] [evidence TAS] [pmid 4005226]; go_function: plasma protein [goid 0005209] [evidence NR]; go_function: extracellular matrix structural constituent [goid 0005201] [evidence IEA]; go_function: chemokine activity [goid 0008009] [evidence IEA]; go_function: growth factor activity [goid 0…	473.5	567.1	670.3	493	1548.7	635.6	405.2	1293.2	1449.2	863	1042.7	733.9	442.4	303.1	1123.4	287.1	250	764.7	2833.5	379.5
733	GI_22749366-S	NM_152680.1	FLJ32028	Homo sapiens hypothetical protein FLJ32028 (FLJ32028), mRNA.		1081.1	343.8	390.4	416.3	999.2	314	783.7	2242.9	784	1084.4	540.5	867	361.7	319.4	1236.9	114.3	116	1656.1	2576.1	314.9
734	GI_38348347-S	NM_198517.1	FLJ00332	Homo sapiens FLJ00332 protein (FLJ00332), mRNA.		980.2	224.7	259.6	658	724.6	324.7	747.8	1552.2	682.3	997.5	1387.5	605.2	472.8	504.8	2464.1	254.4	237.2	1593.4	1423.7	299.1
735	GI_20149567-S	NM_007103.2	NDUFV1	Homo sapiens NADH dehydrogenase (ubiquinone) flavoprotein 1, 51kDa (NDUFV1), mRNA.	go_component: mitochondrial inner membrane [goid 0005743] [evidence NR] [pmid 8288251]; go_component: NADH dehydrogenase complex (ubiquinone) (sensu Eukarya) [goid 0005748] [evidence IEA]; go_component: mitochondrion [goid 0005739] [evidence IEA]; go_component: membrane fraction [goid 0005624] [evidence NR]; go_function: NADH dehydrogenase (ubiquinone) activity [goid 0008137] [evidence TAS] [pmid…	900.4	196.6	240.9	765.7	899.3	411	723	1110.4	851.8	925.7	896.6	664.3	286.5	277.3	3610.8	151	127.8	1613.4	1492.4	229.5
736	GI_4557234-S	NM_000018.1	ACADVL	Homo sapiens acyl-Coenzyme A dehydrogenase, very long chain (ACADVL), nuclear gene encoding mitochondrial protein, mRNA.	go_component: mitochondrion [goid 0005739] [evidence TAS] [pmid 7668252]; go_function: long-chain-acyl-CoA dehydrogenase activity [goid 0004466] [evidence TAS] [pmid 8466512]; go_function: oxidoreductase activity [goid 0016491] [evidence IEA]; go_process: fatty acid beta-oxidation [goid 0006635] [evidence TAS] [pmid 7668252]; go_process: energy derivation by oxidation of organic compounds [goid 0…	849.1	236.1	263.6	809.7	877	372	752	1651.4	821.9	1037.1	1032.4	791	382.1	349.7	2657.1	146.8	136.7	1548	1233.6	379.9
737	GI_37552316-S	XM_028067.6	MIDN	Homo sapiens midnolin (MIDN), mRNA.		1087.4	150	167.8	620.1	1609.7	354.8	943.1	1240.1	594.2	1034.8	1357.8	844	225.9	177.1	2758.1	74.5	73.4	1201.6	1510.3	290.2
738	GI_8393008-S	NM_013265.2	C11orf2	Homo sapiens chromosome 11 open reading frame2 (C11orf2), mRNA.	go_component: integral to membrane [goid 0016021] [evidence TAS] [pmid 9615229]; go_function: molecular_function unknown [goid 0005554] [evidence ND]; go_process: biological_process unknown [goid 0000004] [evidence ND]	743.2	212.8	235.9	551.9	683.2	311.9	702.3	749.2	769	915.7	1175.3	734.8	376.2	342.4	3000.8	225.1	244.5	2145	1958.3	232.2
739	GI_7706243-S	NM_015921.1	C6orf82	Homo sapiens chromosome 6 open reading frame 82 (C6orf82), mRNA.		828.3	249.4	281.1	735	851.4	438.3	686.4	890.9	712.7	1112.6	892.3	790	344.9	315.8	2716.1	204.6	188.7	1991.7	1830.1	214.3
740	GI_22209006-S	NM_052838.2	39326	Homo sapiens septin 1 (SEPT1), mRNA.	go_function: GTP binding [goid 0005525] [evidence IEA]; go_process: cytokinesis [goid 0016288] [evidence IEA]; go_process: cytokinesis [goid 0000910] [evidence IEA]; go_process: cell cycle [goid 0007049] [evidence IEA]	673.6	207	245.2	601.3	891.7	347.1	681.6	820.7	618.1	874.9	1145.9	750.4	436.4	384.1	3654.2	257.1	264.8	1587	1524.8	289.8
741	GI_42662616-S	XM_374329.2	LOC389865	Homo sapiens LOC389865 (LOC389865), mRNA.		688.9	325.7	360.6	660.5	942.6	435.7	622.5	1892.2	795.8	991.3	1172.5	658.7	587	481.1	1612.1	231.5	227.4	1311.4	1997.3	260.8
742	GI_34222340-S	NM_025078.3	PQLC1	Homo sapiens PQ loop repeat containing 1 (PQLC1), mRNA.		1009.5	277.5	284	646.5	571.6	326.9	806.9	721.8	465.9	739.1	691.7	454.7	616.4	554.1	2818.6	232.3	224.6	2519.5	1695.2	551.2
743	GI_7705904-S	NM_016245.1	DHRS8	Homo sapiens dehydrogenase/reductase (SDR family) member 8 (DHRS8), mRNA.	go_function: oxidoreductase activity [goid 0016491] [evidence IEA]; go_process: metabolism [goid 0008152] [evidence IEA]	945.7	315	335.3	849.7	860.1	636.3	878.4	1759.6	646.5	1005.8	1125.3	683.6	389.2	316.3	1263	186.6	168.2	1553.4	1990.1	260.4
744	GI_27734956-S	NM_173651.1	FLJ34780	Homo sapiens hypothetical protein FLJ34780 (FLJ34780), mRNA.		933.3	120.5	137.7	729.3	831.9	458	857.5	1111.7	1257	919.1	568.1	1215	488.6	304.6	1671.7	305.7	280.1	1584.3	1911.4	457.3
745	GI_23238209-I	NM_005731.2	ARPC2	Homo sapiens actin related protein 2/3 complex, subunit 2, 34kDa (ARPC2), transcript variant 2, mRNA.	go_component: Arp2/3 protein complex [goid 0005885] [evidence P] [pmid 9230079]; go_component: actin cytoskeleton [goid 0015629] [evidence P] [pmid 9230079]; go_function: structural constituent of cytoskeleton [goid 0005200] [evidence P] [pmid 9230079]; go_process: cell motility [goid 0006928] [evidence P] [pmid 9230079]	1007	189.7	254.9	837.2	791.2	666	591.5	421.9	771.7	533.5	607.2	526	152.8	90.3	4387.9	147.2	102.2	1877.9	1793.6	380.9
746	GI_24497600-A	NM_153200.1	EDF1	Homo sapiens endothelial differentiation-related factor 1 (EDF1), transcript variant beta, mRNA.	go_component: intracellular [goid 0005622] [evidence TAS] [pmid 9813014]; go_component: nucleus [goid 0005634] [evidence NAS]; go_function: DNA binding [goid 0003677] [evidence IEA]; go_function: transcriptional activator activity [goid 0016563] [evidence TAS]; go_process: cell growth and/or maintenance [goid 0008151] [evidence TAS] [pmid 9813014]; go_process: development [goid 0007275] [evidence…	686.9	290.7	340.3	596.9	719.9	392.9	645.9	730	729.2	752	1126.2	651.8	483	512.4	2825.6	272.9	265.9	2051.4	1827.5	217.4
747	GI_14249549-S	NM_032837.1	FLJ14775	Homo sapiens hypothetical protein FLJ14775 (FLJ14775), mRNA.	go_component: nucleus [goid 0005634] [evidence IEA]; go_function: DNA binding [goid 0003677] [evidence IEA]; go_process: regulation of transcription, DNA-dependent [goid 0006355] [evidence IEA]	556.9	645.1	758	509.2	789.5	384	511.4	685.3	527.3	526	497.9	364.5	804.1	512.4	1428.7	485.8	333.5	3776.1	1215.1	804.9
748	GI_31657098-A	NM_181472.1	CKLFSF7	Homo sapiens chemokine-like factor super family 7 (CKLFSF7), transcript variant 2, mRNA.	go_component: membrane [goid 0016020] [evidence IEA]; go_component: synaptic vesicle [goid 0008021] [evidence IEA]; go_component: integral to membrane [goid 0016021] [evidence IEA]; go_function: transporter activity [goid 0005215] [evidence IEA]; go_function: cytokine activity [goid 0005125] [evidence IEA]; go_process: transport [goid 0006810] [evidence IEA]; go_process: chemotaxis [goid 0006935]…	690.5	363.6	415.8	755.8	938.3	390.5	705	1159.3	579.4	866.4	835.1	657.3	354.1	319.9	2772.6	156.1	144.8	1740.4	2069.4	197.7
749	GI_33350931-S	NM_001376.2	DNCH1	Homo sapiens dynein, cytoplasmic, heavy polypeptide 1 (DNCH1), mRNA.	go_component: cytoplasmic dynein complex [goid 0005868] [evidence NAS] [pmid 8666668]; go_component: kinesin complex [goid 0005871] [evidence IEA]; go_function: adenosinetriphosphatase activity [goid 0004002] [evidence E] [pmid 8227145]; go_function: motor activity [goid 0003774] [evidence E] [pmid 8227145]; go_function: microtubule motor activity [goid 0003777] [evidence NAS]; go_function: ATP b…	821.3	262.9	295.1	1088.3	1113.4	520	651.2	1127.1	716.9	949.7	929.1	626.8	384.2	371.8	2329	200.1	195.9	1841.7	1312.3	310.2
750	GI_20070157-S	NM_003576.2	STK24	Homo sapiens serine/threonine kinase 24 (STE20 homolog, yeast) (STK24), mRNA.	go_function: protein kinase activity [goid 0004672] [evidence E] [pmid 9353338]; go_function: cAMP-dependent protein kinase activity [goid 0004691] [evidence IEA]; go_function: protein kinase CK2 activity [goid 0004682] [evidence IEA]; go_function: protein-tyrosine kinase activity [goid 0004713] [evidence IEA]; go_function: ATP binding [goid 0005524] [evidence IEA]; go_function: protein serine/th…	928	284	335.2	720.4	869.6	429.5	771.5	1331.8	606.4	768.8	961.1	701.8	412.3	405.8	2391.6	174	172.9	1845.5	1626.9	308
751	GI_41152089-S	NM_005764.3	MAP17	Homo sapiens membrane-associated protein 17 (MAP17), mRNA.	go_component: integral to membrane [goid 0016021] [evidence IEA]; go_component: extracellular [goid 0005576] [evidence NR]; go_process: oncogenesis [goid 0007048] [evidence TAS] [pmid 9815914]	798.4	330.3	364.6	664	272.3	680.7	680.6	458.3	936.3	689.4	658.1	764.8	412.1	373.5	2794	327.3	310	2113.5	2045.9	321.2
752	GI_21389558-S	NM_144669.1	FLJ31978	Homo sapiens hypothetical protein FLJ31978 (FLJ31978), mRNA.	go_process: biosynthesis [goid 0009058] [evidence IEA]	1036.5	347.3	379.2	581	889.6	361.3	779.2	1089.2	647	631.8	869.2	627.5	378	373.7	3543.1	162.5	148.4	1320.8	1447.2	351.8
753	GI_22212942-S	NM_017811.2	UBE2R2	Homo sapiens ubiquitin-conjugating enzyme E2R 2 (UBE2R2), mRNA.	go_function: ubiquitin conjugating enzyme activity [goid 0004840] [evidence IEA]; go_function: ubiquitin-protein ligase activity [goid 0004842] [evidence IEA]; go_function: ligase activity [goid 0016874] [evidence IEA]; go_process: ubiquitin cycle [goid 0006512] [evidence IEA]; go_process: protein modification [goid 0006464] [evidence IEA]	978.6	305.9	337.6	634.5	944.9	435.7	664.9	1250.4	672.3	799.6	877.1	762.1	495.8	485.8	2077.7	167.6	160.7	1651.3	1904.1	339.7
754	GI_31377576-S	NM_152429.2	C10orf13	Homo sapiens chromosome 10 open reading frame 13 (C10orf13), mRNA.	go_component: nucleus [goid 0005634] [evidence IEA]; go_function: DNA binding [goid 0003677] [evidence IEA]; go_process: regulation of transcription, DNA-dependent [goid 0006355] [evidence IEA]	1016.4	150.3	214.3	844.3	772	858.6	572	424.4	729.8	498.4	584.6	581.2	118.9	65.7	3734.6	127.3	62	2060.6	1970.1	534.6
755	GI_27482991-S	XM_210334.1	LOC284064	Homo sapiens similar to 60S ribosomal protein L29 (Cell surface heparin binding protein HIP) (LOC284064), mRNA.		703.7	190.9	251.8	623.8	828.8	381.9	484.9	1175	926.9	1101.6	998.5	830.7	157.5	72.4	3150	108.9	95.8	2201.9	1390.7	231.4
756	GI_8923696-S	NM_017967.1	FLJ20850	Homo sapiens hypothetical protein FLJ20850 (FLJ20850), mRNA.		951.4	222.6	254	684.8	755.1	371.8	694.7	763.7	771.6	1013.7	796.1	674.9	348.5	328	3588.5	134.7	141.7	1417.2	1699	284.2
757	GI_12232430-S	NM_022761.1	C11orf1	Homo sapiens chromosome 11 open reading frame 1 (C11orf1), mRNA.		751.2	178.6	206.1	539.6	775.5	308.3	457.6	1128.9	654.4	996.3	920.4	1077.4	167.7	143.3	3611.8	93.3	98.7	1831.3	1506.4	351.3
758	GI_27480910-S	XM_209971.1	LOC286257	Homo sapiens hypothetical protein LOC286257 (LOC286257), mRNA.		858.6	235.8	266.1	760.7	652.9	315.6	720.2	972.7	708.1	1159.1	923.6	728.1	321.3	319.4	2950	164.2	157.6	1725.6	1611.4	238.7
759	GI_11415027-S	NM_021966.1	TCL1A	Homo sapiens T-cell leukemia/lymphoma 1A (TCL1A), mRNA.	go_component: microsome [goid 0005792] [evidence IEA]; go_process: development [goid 0007275] [evidence TAS] [pmid 7809072]; go_process: cell growth and/or maintenance [goid 0008151] [evidence IEA]	737	234.8	259.3	455.4	187.7	712.2	606.2	824.6	553.6	574.6	470.6	470	487.8	423	4690.4	297.8	292.3	1991.3	1376.5	136.5
760	GI_20302162-S	NM_005028.3	PIP5K2A	Homo sapiens phosphatidylinositol-4-phosphate 5-kinase, type II, alpha (PIP5K2A), mRNA.	go_function: 1-phosphatidylinositol-4-phosphate kinase [goid 0004431] [evidence E] [pmid 7852364]; go_process: glycerophospholipid metabolism [goid 0006650] [evidence NR]	553.2	403.1	527.5	533.8	676	434.1	488.2	379.8	401.6	350.2	422.5	361.5	531.8	439.4	2417.6	338.1	326.9	3980.1	1548	614.2
761	GI_4502170-S	NM_000485.1	APRT	Homo sapiens adenine phosphoribosyltransferase (APRT), mRNA.	go_function: adenine phosphoribosyltransferase activity [goid 0003999] [evidence TAS] [pmid 3531209]; go_function: transferase activity, transferring glycosyl groups [goid 0016757] [evidence IEA]; go_process: nucleoside metabolism [goid 0009116] [evidence IEA]; go_process: adenine salvage pathway [goid 0006168] [evidence IEA]	907.9	202.5	252	751.8	844.2	293.3	613.3	748.5	910.3	1025.9	1377.5	843.6	334.3	277.5	2469.1	131.1	124.4	1660.5	1674.9	268
762	GI_34147629-S	NM_003321.3	TUFM	Homo sapiens Tu translation elongation factor, mitochondrial (TUFM), mRNA.	go_component: mitochondrion [goid 0005739] [evidence TAS] [pmid 9332382]; go_function: translation elongation factor activity [goid 0003746] [evidence TAS] [pmid 9332382]; go_function: GTP binding [goid 0005525] [evidence IEA]; go_function: protein-synthesizing GTPase activity [goid 0008547] [evidence IEA]; go_process: translational elongation [goid 0006414] [evidence TAS] [pmid 9332382]	787.1	228.3	265.9	561.6	657.7	306.3	703.3	892.9	825.9	1072.5	766.2	749.9	371.8	323.7	3234.3	189.4	166	1770.5	1543	289
763	GI_18201904-S	NM_000175.2	GPI	Homo sapiens glucose phosphate isomerase (GPI), mRNA.	go_function: cytokine activity [goid 0005125] [evidence IEA]; go_function: growth factor activity [goid 0008083] [evidence IEA]; go_function: glucose-6-phosphate isomerase activity [goid 0004347] [evidence IEA]; go_function: isomerase activity [goid 0016853] [evidence IEA]; go_process: hemostasis [goid 0007599] [evidence TAS] [pmid 7435496]; go_process: humoral immune response [goid 0006959] [evi…	837.6	112	145.3	682.7	1155.3	488.9	705.8	588.1	850.8	881.3	844.3	674.3	211.2	193.8	2940.5	141.9	136.1	1844.2	1700.5	567.1
764	GI_14574565-A	NM_032955.1	AIF1	Homo sapiens allograft inflammatory factor 1 (AIF1), transcript variant 1, mRNA.	go_component: nucleus [goid 0005634] [evidence P] [pmid 9614071]; go_process: cell cycle arrest [goid 0007050] [evidence E] [pmid 9614071]; go_process: negative regulation of cell proliferation [goid 0008285] [evidence E] [pmid 9614071]; go_process: response to stress [goid 0006950] [evidence E] [pmid 9614071]; go_process: inflammatory response [goid 0006954] [evidence E] [pmid 8912632]	675.6	400.3	438.5	559.6	909.8	397.7	598	1016.5	1014.6	1053.2	867.3	699.1	435.6	405.8	2586.9	204.7	189.4	1443.3	1470.3	290.7
765	GI_4503580-S	NM_001978.1	EPB49	Homo sapiens erythrocyte membrane protein band 4.9 (dematin) (EPB49), mRNA.	go_component: actin cytoskeleton [goid 0015629] [evidence TAS] [pmid 8341682]; go_component: plasma membrane [goid 0005886] [evidence NR]; go_function: actin bundling activity [goid 0003781] [evidence TAS] [pmid 7615546]; go_function: structural constituent of cytoskeleton [goid 0005200] [evidence IEA]; go_process: cell shape and cell size control [goid 0007148] [evidence P] [pmid 8341682]; go_pr…	709	230.1	259.6	438.1	521.8	271.8	592.6	375.4	551.7	496.9	850.3	389	717.6	656	2614.3	679.7	649.8	2310.2	1773.8	549.3
766	GI_10835138-S	NM_000570.1	FCGR3B	Homo sapiens Fc fragment of IgG, low affinity IIIb, receptor for (CD16) (FCGR3B), mRNA.	go_function: receptor activity [goid 0004872] [evidence IEA]; go_function: IgG binding [goid 0019864] [evidence IEA]; go_process: immune response [goid 0006955] [evidence TAS] [pmid 2139735]	721.9	266.6	326.1	793.5	1541.5	838.4	634.6	2725.5	492.4	421.6	1748.1	613.9	392.3	328.4	839.2	194	171.1	1013.5	1191.6	362.8
767	GI_38016906-A	NM_198194.1	STOM	Homo sapiens stomatin (STOM), transcript variant 2, mRNA.	go_component: cytoskeleton [goid 0005856] [evidence TAS] [pmid 7592848]; go_component: integral to plasma membrane [goid 0005887] [evidence TAS] [pmid 7592848]	533	486.8	554.4	704	719.7	469.8	463.8	987.6	526.5	821.6	626.2	566.2	510.2	460.3	1284.2	260.2	262.2	2369.3	1473.5	1472.4
768	GI_37539539-S	XM_353491.1	LOC375768	Homo sapiens LOC375768 (LOC375768), mRNA.		950.8	234.8	284.1	798.4	852.9	474.3	761.9	753	733.6	915.8	883.6	789.9	254.7	229.4	2628.6	131.6	130.3	1624	1747.9	355.7
769	GI_31881739-S	NM_020246.2	SLC12A9	Homo sapiens solute carrier family 12 (potassium/chloride transporters), member 9 (SLC12A9), mRNA.	go_component: integral to membrane [goid 0016021] [evidence P] [pmid 10871601]; go_function: cation:chloride symporter activity [goid 0015377] [evidence E] [pmid 10871601]; go_function: protein binding [goid 0005515] [evidence E] [pmid 10871601]	939.3	350.6	389.7	681.5	957.4	406.2	767.7	1175.2	520.9	782.2	901.3	777.4	436	405.9	1856.3	180.2	171.1	1475.8	2096.2	239.8
770	GI_17017987-S	NM_001862.2	COX5B	Homo sapiens cytochrome c oxidase subunit Vb (COX5B), mRNA.	go_component: mitochondrial membrane [goid 0005740] [evidence IEA]; go_component: inner membrane [goid 0019866] [evidence IEA]; go_function: cytochrome-c oxidase activity [goid 0004129] [evidence TAS] [pmid 1646156]; go_function: aa3-type cytochrome c oxidase [goid 0009481] [evidence IEA]; go_function: oxidoreductase activity [goid 0016491] [evidence IEA]; go_function: ba3-type cytochrome c oxida…	826.4	219.9	276.2	630.6	730.1	663.5	559.8	1266.2	802.1	956.7	708.4	740.1	313.7	290.9	2686.1	120	127	1550.8	1693	311.2
771	GI_4758499-A	NM_004904.1	CREB5	Homo sapiens cAMP responsive element binding protein 5 (CREB5), mRNA.	go_component: nucleus [goid 0005634] [evidence IEA]; go_function: transcription activating factor [goid 0003710] [evidence E] [pmid 8378084]; go_function: DNA binding [goid 0003677] [evidence IEA]; go_process: transcription from Pol II promoter [goid 0006366] [evidence TAS] [pmid 8378084]; go_process: regulation of transcription, DNA-dependent [goid 0006355] [evidence IEA]	626.5	209.8	242.9	581.3	868.6	441	549.1	1345.8	441.5	610.4	1144.1	679.3	595.2	578.1	2346.6	164.7	163	1435.2	2141.1	294.2
772	GI_19923467-S	NM_016457.2	PRKD2	Homo sapiens protein kinase D2 (PRKD2), mRNA.	go_component: intracellular [goid 0005622] [evidence NAS]; go_function: ATP binding [goid 0005524] [evidence NAS]; go_function: protein serine/threonine kinase activity [goid 0004674] [evidence NAS] [pmid 11062248]; go_function: transferase activity [goid 0016740] [evidence IEA]; go_function: diacylglycerol binding [goid 0019992] [evidence IEA]; go_process: protein amino acid phosphorylation [goi…	886.4	179.4	196.1	599.8	1105.8	277.5	792.2	1174	814.3	1035.9	1038.9	826.1	338.6	334.4	2737.2	180.8	170.7	1159.7	1297.2	304.4
773	GI_24475978-S	NM_016494.2	LOC51255	Homo sapiens hypothetical protein LOC51255 (LOC51255), mRNA.		748.9	285.3	347.6	783.5	732.3	484	601.3	999	686.4	920.9	693.2	658.6	397.2	372.1	2747.7	154.1	149.3	1738.3	1607.1	312.1
774	GI_41327758-S	NM_001697.2	ATP5O	Homo sapiens ATP synthase, H+ transporting, mitochondrial F1 complex, O subunit (oligomycin sensitivity conferring protein) (ATP5O), nuclear gene encoding mitochondrial protein, mRNA.	go_component: proton-transporting ATP synthase complex (sensu Eukarya) [goid 0005753] [evidence TAS] [pmid 7490082]; go_component: mitochondrion [goid 0005739] [evidence IEA]; go_component: membrane fraction [goid 0005624] [evidence NR]; go_function: hydrogen-transporting two-sector ATPase activity [goid 0003936] [evidence IEA] [pmid 7490082]; go_function: transporter activity [goid 0005215] [evi…	696.2	327.9	408.7	880.9	1109.8	467.2	705	1412	818.4	1033.3	631.9	397.8	381.3	354.4	2017.1	195.7	187.8	1887.1	1200.5	258.2
775	GI_41281884-S	NM_013387.2	HSPC051	Homo sapiens ubiquinol-cytochrome c reductase complex (7.2 kD) (HSPC051), mRNA.		674.6	388.3	432.4	717.5	639	522.5	564.6	1026.7	531	795.5	584.8	570.8	401.4	415.4	2931.5	203.1	217.5	1900.8	1609	214.8
776	GI_4505988-S	NM_000308.1	PPGB	Homo sapiens protective protein for beta-galactosidase (galactosialidosis) (PPGB), mRNA.	go_component: lysosome [goid 0005764] [evidence NR]; go_component: endoplasmic reticulum [goid 0005783] [evidence TAS] [pmid 1387645]; go_function: carboxypeptidase activity [goid 0004180] [evidence TAS] [pmid 2244901]; go_function: intracellular transporter activity [goid 0005478] [evidence TAS] [pmid 1387645]; go_function: enzyme activator activity [goid 0008047] [evidence TAS] [pmid 3107551]; …	677.8	342.1	391.3	723.3	830.4	529.6	562.7	905.6	565.7	859.4	739	915.2	232.5	269.9	3353.3	138.7	148.4	1090.8	1710.7	352.4
777	GI_21735620-S	NM_005918.2	MDH2	Homo sapiens malate dehydrogenase 2, NAD (mitochondrial) (MDH2), mRNA.	go_component: mitochondrial matrix [goid 0005759] [evidence NAS]; go_function: oxidoreductase activity [goid 0016491] [evidence IEA]; go_function: L-malate dehydrogenase activity [goid 0030060] [evidence NAS]; go_process: tricarboxylic acid cycle [goid 0006099] [evidence IEA]; go_process: biological_process unknown [goid 0000004] [evidence ND]	901.8	196	248	678.7	902	422.5	727.1	1066.6	768.9	759.8	1298.1	746.9	306.7	280.5	2034.3	179.9	174.9	1736.7	1576.9	318
778	GI_21704270-A	NM_032958.2	POLR2J2	Homo sapiens DNA directed RNA polymerase II polypeptide J-related gene (POLR2J2), transcript variant 2, mRNA.	go_function: DNA-directed RNA polymerase activity [goid 0003899] [evidence IEA]; go_function: DNA binding [goid 0003677] [evidence IEA]; go_process: transcription [goid 0006350] [evidence IEA]	787.4	228.8	264.7	734.2	1035.3	600.2	696.9	1338.9	909.4	942.9	1149.9	776.9	267.3	187.4	1668.7	130.3	99.2	1600.6	1388.4	502.3
779	GI_45359860-S	NM_021128.3	POLR2L	Homo sapiens polymerase (RNA) II (DNA directed) polypeptide L, 7.6kDa (POLR2L), mRNA.	go_component: DNA-directed RNA polymerase III complex [goid 0005666] [evidence NR]; go_component: DNA-directed RNA polymerase II, core complex [goid 0005665] [evidence TAS]; go_component: nucleus [goid 0005634] [evidence IEA]; go_function: DNA-directed RNA polymerase II activity [goid 0003901] [evidence TAS] [pmid 8524256]; go_function: DNA-directed RNA polymerase I activity [goid 0003900] [evide…	734	198.1	210.6	551	761.9	414.9	689.1	748.7	565.8	857.5	945.7	672.5	474.4	387.4	2329.8	246.1	236.5	2046.7	1953.3	263.3
780	GI_5597012-S	NM_000391.2	CLN2	Homo sapiens ceroid-lipofuscinosis, neuronal 2, late infantile (Jansky-Bielschowsky disease) (CLN2), mRNA.	go_component: lysosome [goid 0005764] [evidence TAS] [pmid 9295267]; go_function: peptidase activity [goid 0008233] [evidence TAS] [pmid 9295267]; go_function: serine-type endopeptidase activity [goid 0004252] [evidence IEA]; go_function: tripeptidyl-peptidase I activity [goid 0019131] [evidence IEA]; go_process: proteolysis and peptidolysis [goid 0006508] [evidence TAS] [pmid 9295267]; go_proces…	690.3	270.9	316.1	552.8	794.6	324.5	589.5	1247.7	518.3	732.9	833	597.5	452.4	443.3	2503.5	233.3	216.7	1950.2	1772.3	236.7
781	GI_4505878-S	NM_002664.1	PLEK	Homo sapiens pleckstrin (PLEK), mRNA.	go_function: calcium ion binding [goid 0005509] [evidence TAS] [pmid 2897630]; go_process: intracellular signaling cascade [goid 0007242] [evidence IEA]	842.5	324.5	377.5	819.6	1043.1	440.9	587.8	1654.5	520.5	871.8	604.8	596.8	389.3	343.4	1311.5	132	129	1889.6	2051	322.7
782	GI_4826959-S	NM_005051.1	QARS	Homo sapiens glutaminyl-tRNA synthetase (QARS), mRNA.	go_component: soluble fraction [goid 0005625] [evidence NR]; go_component: cytoplasm [goid 0005737] [evidence NR]; go_function: glutamine-tRNA ligase activity [goid 0004819] [evidence TAS] [pmid 8078941]; go_function: ATP binding [goid 0005524] [evidence IEA]; go_function: glutamate-tRNA ligase activity [goid 0004818] [evidence IEA]; go_function: ligase activity [goid 0016874] [evidence IEA]; go_…	849.1	268.8	278.8	639.7	783.7	330.4	725.9	947.8	785.4	917.1	951.4	627.7	392.3	368.7	2206.8	139.7	130.3	2029.6	1581.2	282.3
783	GI_32401415-S	NM_181725.1	FLJ12760	Homo sapiens hypothetical protein FLJ12760 (FLJ12760), mRNA.		574.8	136.5	160.9	537	757.2	238.8	396	1148.3	684.8	906.5	889.5	874.1	232.9	163.6	3225.8	99.9	108.9	1884.4	1862	314.7
784	GI_34577109-I	NM_184041.1	ALDOA	Homo sapiens aldolase A, fructose-bisphosphate (ALDOA), transcript variant 2, mRNA.	go_function: fructose-bisphosphate aldolase activity [goid 0004332] [evidence TAS] [pmid 2825199]; go_function: lyase activity [goid 0016829] [evidence IEA]; go_process: fructose metabolism [goid 0006000] [evidence TAS] [pmid 2825199]; go_process: striated muscle contraction [goid 0006941] [evidence TAS] [pmid 8598869]; go_process: glycolysis [goid 0006096] [evidence TAS] [pmid 2825199]	821.6	244.8	297.8	532.8	1316.6	265.5	732.2	1438.5	977.4	594.1	2045.5	765.7	203.3	146.1	1061.2	119	110.7	1799.3	1321.8	365
785	GI_18641367-A	NM_130439.1	MXI1	Homo sapiens MAX interacting protein 1 (MXI1), transcript variant 2, mRNA.	go_component: nucleus [goid 0005634] [evidence P] [pmid 8425219]; go_function: transcription factor binding, cytoplasmic sequestering [goid 0003719] [evidence P] [pmid 8425219]; go_function: transcription co-repressor activity [goid 0003714] [evidence E] [pmid 8425219]; go_function: tumor suppressor [goid 0008181] [evidence E]; go_function: DNA binding [goid 0003677] [evidence E] [pmid 8425219]; …	715.4	417.4	492.9	664.6	662.4	669.1	528.4	803.8	491.7	642.4	720	440.8	282.9	226.2	2228.4	158.8	163.2	1895.5	1910.6	1022.4
786	GI_5032092-S	NM_005628.1	SLC1A5	Homo sapiens solute carrier family 1 (neutral amino acid transporter), member 5 (SLC1A5), mRNA.	go_component: membrane fraction [goid 0005624] [evidence TAS] [pmid 8702519]; go_component: integral to plasma membrane [goid 0005887] [evidence TAS] [pmid 8702519]; go_function: neutral amino acid transporter activity [goid 0015175] [evidence TAS] [pmid 10051606]; go_function: receptor activity [goid 0004872] [evidence TAS] [pmid 10051606]; go_function: sodium:dicarboxylate/tricarboxylate sympor…	774	240.5	272.9	622.9	902	489.8	660.5	612.4	534.3	580.2	448.6	567.4	334	315.5	1846.9	126.7	130.8	2382	2280.6	998
787	GI_19913440-A	NM_002149.2	HPCAL1	Homo sapiens hippocalcin-like 1 (HPCAL1), transcript variant 1, mRNA.	go_component: cytosol [goid 0005829] [evidence ISS] [pmid 11964161]; go_component: clathrin coat of trans-Golgi network vesicle [goid 0030130] [evidence ISS] [pmid 11964161]; go_function: calcium ion binding [goid 0005509] [evidence ISS] [pmid 8387172]; go_function: tubulin binding [goid 0015631] [evidence ISS] [pmid 11964161]; go_function: actin binding [goid 0003779] [evidence ISS] [pmid 119641…	809.2	292.1	337.9	650.7	884.7	480.3	651.1	656.9	643.2	638.3	758.6	587.8	390.8	380.6	3083.3	208.9	210.2	1544.5	1605.9	287
788	GI_29826318-A	NM_001119.3	ADD1	Homo sapiens adducin 1 (alpha) (ADD1), transcript variant 1, mRNA.	go_component: membrane [goid 0016020] [evidence NR]; go_component: actin cytoskeleton [goid 0015629] [evidence NR]; go_function: actin binding [goid 0003779] [evidence P] [pmid 1840603]; go_function: calmodulin binding [goid 0005516] [evidence NR]; go_function: structural constituent of cytoskeleton [goid 0005200] [evidence NR]	794.6	266.2	295.2	564.5	805.2	341	691.3	766.4	531.4	607.5	898.4	520.8	488.9	450.9	2177.8	296.2	286.9	2315.8	1588.6	412.2
789	GI_13375694-S	NM_024537.1	FLJ12118	Homo sapiens hypothetical protein FLJ12118 (FLJ12118), mRNA.	go_function: ATP binding [goid 0005524] [evidence IEA]; go_function: cysteine-tRNA ligase activity [goid 0004817] [evidence IEA]; go_process: cysteinyl-tRNA aminoacylation [goid 0006423] [evidence IEA]	707.6	198.5	215.6	1038.5	932.3	524.5	599.2	1788.2	703	977.2	870.2	741.6	295.6	275.2	2440.8	148.9	132.9	918.3	1266.7	281.2
790	GI_14110413-A	NM_002138.2	HNRPD	Homo sapiens heterogeneous nuclear ribonucleoprotein D (AU-rich element RNA binding protein 1, 37kDa) (HNRPD), transcript variant 3, mRNA.	go_component: nucleus [goid 0005634] [evidence P] [pmid 10205060]; go_function: RNA binding [goid 0003723] [evidence P] [pmid 10205060]; go_process: RNA processing [goid 0006396] [evidence P] [pmid 10205060]; go_process: RNA catabolism [goid 0006401] [evidence P] [pmid 10205060]	843.6	306.8	358.2	664.1	842.7	355.2	603.3	1268.1	534.5	806.6	968.6	590.6	342.9	220.6	2523.5	171.8	148.7	1727.6	1536	223
791	GI_4506116-S	NM_000313.1	PROS1	Homo sapiens protein S (alpha) (PROS1), mRNA.	go_component: extracellular [goid 0005576] [evidence IEA]; go_function: endopeptidase inhibitor activity [goid 0004866] [evidence TAS] [pmid 8146182]; go_function: calcium ion binding [goid 0005509] [evidence IEA]; go_process: blood coagulation [goid 0007596] [evidence TAS] [pmid 9657428]	1114.6	115.2	148.7	586.6	660.9	402.2	539.5	363	803.2	495.2	788.1	587.6	157	63	4043.2	150.3	95.2	1779.4	1681.4	460.9
792	GI_21361950-S	NM_025222.2	PRO2730	Homo sapiens hypothetical protein PRO2730 (PRO2730), mRNA.		629.2	201.7	263.4	544.7	730.4	284.4	516.7	892.8	663.7	939.8	1010.1	840.1	220.6	220.6	2913.3	120.5	118.7	1939.1	1660.4	320.8
793	GI_25952117-A	NM_171825.1	CAMK2A	Homo sapiens calcium/calmodulin-dependent protein kinase (CaM kinase) II alpha (CAMK2A), transcript variant 2, mRNA.	go_function: calmodulin-dependent protein kinase I activity [goid 0004684] [evidence IEA]; go_function: calcium/calmodulin-dependent protein kinase activity [goid 0004685] [evidence IEA]; go_function: ATP binding [goid 0005524] [evidence IEA]; go_function: protein serine/threonine kinase activity [goid 0004674] [evidence IEA]; go_function: calmodulin binding [goid 0005516] [evidence IEA]; go_func…	1028.3	165.9	222	602	757.6	465.9	606.4	398.4	768.8	494.6	719.4	595.5	155.2	34.7	3245	146.4	44.2	1942.3	2147.8	485.3
794	GI_13994332-S	NM_031943.1	IFP38	Homo sapiens IFP38 (IFP38), mRNA.	go_function: translation initiation factor activity [goid 0003743] [evidence IEA]; go_process: translational initiation [goid 0006413] [evidence IEA]	768.4	156	187.8	580	753.7	303.7	650.5	1183.9	722.3	995.8	916.2	826.6	204.7	79.5	2600.9	96.2	80.5	2013.7	1634.2	230.4
795	GI_21389374-I	NM_144592.1	C10orf6	Homo sapiens chromosome 10 open reading frame 6 (C10orf6), mRNA.		596.7	89.3	100.3	725.4	695.3	321.6	547.4	1387.4	692.6	868	787	894.4	95.5	56.2	3986.3	52.4	45.3	1324.1	1367.9	325.9
796	GI_30089944-A	NM_178044.1	MGC5178	Homo sapiens hypothetical protein MGC5178 (MGC5178), transcript variant 2, mRNA.		922	147.9	166.4	803.9	749.6	313	770.9	866.7	832.1	1199.8	951.5	784.6	346.5	290.7	1480.8	138.4	130.4	1921.4	1765.7	333.2
797	GI_19743870-I	NM_133279.1	FCAR	Homo sapiens Fc fragment of IgA, receptor for (FCAR), transcript variant 9, mRNA.	go_component: integral to plasma membrane [goid 0005887] [evidence P] [pmid 2258698]; go_component: plasma membrane [goid 0005886] [evidence E] [pmid 2258698]; go_function: receptor activity [goid 0004872] [evidence NR]; go_function: receptor signaling protein activity [goid 0005057] [evidence NR]; go_process: immune response [goid 0006955] [evidence E]	727	140.7	185.2	485.7	558	281.4	429.9	1013.5	745	1033.7	913.6	1026.2	147.3	142.5	3202	80.2	79.4	1809.9	1508.9	368.7
798	GI_34147599-S	NM_002414.3	CD99	Homo sapiens CD99 antigen (CD99), mRNA.	go_component: proteoglycan integral to plasma membrane [goid 0005888] [evidence TAS] [pmid 2479542]; go_component: cytoplasm [goid 0005737] [evidence TAS] [pmid 2479542]; go_component: integral to plasma membrane [goid 0005887] [evidence TAS] [pmid 2465491]; go_component: plasma membrane [goid 0005886] [evidence P] [pmid 2465491]; go_function: cell adhesion molecule activity [goid 0005194] [evide…	803.5	206.4	233.1	647.2	601	300.7	727	1030.2	694.6	1161.2	1238.1	735	332.4	306.6	1921.4	153.3	153.3	1741.4	1586.6	294
799	GI_38455419-S	NM_013441.2	DSCR1L2	Homo sapiens Down syndrome critical region gene 1-like 2 (DSCR1L2), mRNA.	go_function: RNA binding [goid 0003723] [evidence TAS] [pmid 10756093]; go_process: embryogenesis and morphogenesis [goid 0007345] [evidence TAS] [pmid 10756093]; go_process: calcium-mediated signaling [goid 0019722] [evidence IEA]; go_process: morphogenesis [goid 0009653] [evidence TAS]	940.4	178.1	274.3	846.3	683.7	660.9	572.3	367.1	682.4	419.3	591.6	520.4	195.7	71.6	3098.8	167.7	141	1886.5	2174.9	353.7
800	GI_34222293-S	NM_001687.3	ATP5D	Homo sapiens ATP synthase, H+ transporting, mitochondrial F1 complex, delta subunit (ATP5D), mRNA.	go_component: proton-transporting ATP synthase complex (sensu Eukarya) [goid 0005753] [evidence TAS] [pmid 1531933]; go_component: mitochondrion [goid 0005739] [evidence IEA]; go_component: membrane fraction [goid 0005624] [evidence NR]; go_function: hydrogen-transporting two-sector ATPase activity [goid 0003936] [evidence IEA]; go_function: transporter activity [goid 0005215] [evidence NR] [pmid…	805.2	193.9	204.6	459.1	748.6	348.8	672.6	724.8	663	828.3	1337.2	766.7	325.9	301.1	2521.3	186.6	170.6	1726.1	1591	248.3
801	GI_40805821-S	NM_007263.3	COPE	Homo sapiens coatomer protein complex, subunit epsilon (COPE), transcript variant 1, mRNA.	go_component: membrane [goid 0016020] [evidence IEA]; go_component: Golgi apparatus [goid 0005794] [evidence IEA]; go_function: protein transporter activity [goid 0008565] [evidence IEA]; go_process: nonselective vesicle transport [goid 0006899] [evidence TAS] [pmid 10404641]; go_process: antimicrobial humoral response (sensu Invertebrata) [goid 0006960] [evidence TAS] [pmid 10404641]; go_process…	767.6	186.2	214.5	580.4	788.1	322.7	666.2	968.5	765.6	925.6	917.1	748.9	329.4	320.8	2598.4	176.1	171.4	1394.2	1665.3	270.7
802	GI_42660139-S	XM_370710.2	LOC387902	Homo sapiens similar to protein 40kD (LOC387902), mRNA.		535.3	257	280.6	723.6	708.6	442.8	446.5	1350.8	1103.2	893.5	838.1	587.2	240.2	158.1	1732.3	153.4	161	2425.4	1486.9	243.2
803	GI_17105398-A	NM_005112.3	WDR1	Homo sapiens WD repeat domain 1 (WDR1), transcript variant 2, mRNA.	go_component: cytoskeleton [goid 0005856] [evidence IEA]; go_function: protein binding [goid 0005515] [evidence TAS] [pmid 10036186]; go_function: actin binding [goid 0003779] [evidence IEA]; go_process: hearing [goid 0007605] [evidence TAS] [pmid 10036186]	729.8	271.8	296.7	868.4	960.6	414.7	621.6	1419.3	607.9	816.3	1212.5	540.2	379	311.7	1760.5	141.7	143	1709.7	1303.6	246.2
804	GI_42660034-S	XM_370685.2	LOC144363	Homo sapiens hypothetical protein LOC144363 (LOC144363), mRNA.		1058	100.7	122.2	683.3	517.9	458.2	502.8	383.1	913.4	501.4	570.2	612.7	132.8	53	4130.9	113.9	35.9	1754	1633.9	466
805	GI_21450855-A	NM_139267.1	STARD7	Homo sapiens START domain containing 7 (STARD7), transcript variant 2, mRNA.		847.6	263.4	306.3	887.5	749.6	426.4	720.4	1540.4	701.8	945.6	814.3	521.6	318	273.3	1566.1	123.9	121.9	1902.3	1471.7	235.9
806	GI_25282406-S	NM_006084.3	ISGF3G	Homo sapiens interferon-stimulated transcription factor 3, gamma 48kDa (ISGF3G), mRNA.	go_component: cytoplasm [goid 0005737] [evidence TAS] [pmid 1630447]; go_component: nucleus [goid 0005634] [evidence TAS] [pmid 1630447]; go_function: transcription factor activity [goid 0003700] [evidence TAS] [pmid 1630447]; go_function: translation regulator activity [goid 0045182] [evidence IEA]; go_process: cell surface receptor linked signal transduction [goid 0007166] [evidence TAS] [pmid …	636.3	331	411.4	706.5	956.9	332	513.6	1148.8	569.3	765.8	870.5	714.9	442.5	364.7	2357.5	182.9	188.4	1115.5	1875.6	246.1
807	GI_7706468-S	NM_016270.1	KLF2	Homo sapiens Kruppel-like factor 2 (lung) (KLF2), mRNA.	go_component: nucleus [goid 0005634] [evidence NAS]; go_function: transcriptional activator activity [goid 0016563] [evidence NAS]; go_function: translation regulator activity [goid 0045182] [evidence IEA]; go_function: transcription factor activity [goid 0003700] [evidence NAS]; go_process: regulation of transcription, DNA-dependent [goid 0006355] [evidence IEA]	679.7	223.9	245.7	604	855.2	346.9	669	1142	566.9	738.2	1291.3	507.1	313.1	281.6	1905.6	137.2	132.1	2012.9	1781.4	208.4
808	GI_14916487-I	NM_032974.1	CASP10	Homo sapiens caspase 10, apoptosis-related cysteine protease (CASP10), transcript variant B, mRNA.	go_function: caspase-10 activity [goid 0004206] [evidence TAS] [pmid 10412980]; go_function: caspase activity [goid 0004199] [evidence TAS] [pmid 8755496]; go_function: cysteine-type peptidase activity [goid 0008234] [evidence IEA]; go_function: apoptosis regulator activity [goid 0016329] [evidence IEA]; go_function: hydrolase activity [goid 0016787] [evidence IEA]; go_process: induction of apopt…	804.5	147.2	171.8	737.7	844.6	455.9	545.1	1405.7	709.1	1036.9	789.2	791.7	192.8	182.7	2054.3	125.9	128.5	1487.1	1596.7	430.9
809	GI_42658709-S	XM_380042.1	LOC402694	Homo sapiens similar to 60S ribosomal protein L15 (LOC402694), mRNA.		617.6	369.4	496.4	736.2	511.2	504.1	478.4	1291	659.9	1027.7	661.8	645.2	287.6	221.1	1915	156.3	138	1950.2	1700.9	263.7
810	GI_40018625-S	NM_130807.2	MOBKL2A	Homo sapiens MOB1, Mps One Binder kinase activator-like 2A (yeast) (MOBKL2A), mRNA.		850.1	146.9	171.4	437.5	881.8	245.8	784.3	934	613.5	671.5	1287	712.6	336.5	301.7	3174.9	165.7	171.7	1199.8	1254	254.2
811	GI_17921996-S	NM_002476.2	MYL4	Homo sapiens myosin, light polypeptide 4, alkali; atrial, embryonic (MYL4), mRNA.	go_component: muscle myosin [goid 0005859] [evidence NR]; go_function: structural constituent of muscle [goid 0008307] [evidence NR]	785.3	322.4	354.5	881	545.9	574.6	533	397.9	619.6	485.1	370.8	499.4	332.5	348.3	1538.2	314	316.3	2489.9	2354.6	485.8
812	GI_40254838-S	NM_006261.2	PROP1	Homo sapiens prophet of Pit1, paired-like homeodomain transcription factor (PROP1), mRNA.	go_component: nucleus [goid 0005634] [evidence IEA]; go_function: RNA polymerase II transcription factor activity [goid 0003702] [evidence TAS] [pmid 9462743]; go_function: transcription factor activity [goid 0003700] [evidence IEA]; go_process: central nervous system development [goid 0007417] [evidence TAS] [pmid 9462743]; go_process: regulation of transcription, DNA-dependent [goid 0006355] [e…	911	124	160	554.3	551.3	482.5	444.7	321.1	664.7	388.3	589.9	515.4	95	32.1	3466.5	93.4	36	2450.4	2257.3	384.9
813	GI_24475949-S	NM_014387.2	LAT	Homo sapiens linker for activation of T cells (LAT), mRNA.	go_component: integral to membrane [goid 0016021] [evidence IEA]; go_function: SH3/SH2 adaptor protein activity [goid 0005070] [evidence TAS] [pmid 9529333]; go_process: immune response [goid 0006955] [evidence TAS] [pmid 9529333]; go_process: signal transduction [goid 0007165] [evidence IEA]	618.1	291.9	359.7	731.5	729	407	455.2	928.7	624.8	836.8	737.1	610.8	296.9	275.8	2389.2	189.3	192.6	2131	1500.1	193.8
814	GI_25777674-A	NM_170773.1	RASSF2	Homo sapiens Ras association (RalGDS/AF-6) domain family 2 (RASSF2), transcript variant 2, mRNA.	go_process: neuropeptide signaling pathway [goid 0007218] [evidence IEA]	696.7	267.9	285.3	658.8	661.1	389.2	652	1853.5	579.7	754.6	1188.9	531.1	486.3	446.4	1240.1	163.6	158.7	1325.6	1876	245.7
815	GI_37548628-S	XM_291544.2	LOC343384	Homo sapiens similar to peptidyl-Pro cis trans isomerase (LOC343384), mRNA.		714	165.8	196	747.8	1029	514.2	564.3	1761.5	971	1174.5	1027.2	682.3	210.3	138.6	1637.8	98.7	77.9	1471.1	881.7	347.9
816	GI_28872791-A	NM_176096.1	CDK5RAP3	Homo sapiens CDK5 regulatory subunit associated protein 3 (CDK5RAP3), transcript variant 3, mRNA.	go_component: cellular_component unknown [goid 0008372] [evidence ND]; go_function: neuronal Cdc2-like kinase binding [goid 0042808] [evidence NAS]; go_process: regulation of CDK activity [goid 0000079] [evidence ISS]; go_process: brain development [goid 0007420] [evidence NAS]; go_process: cell proliferation [goid 0008283] [evidence ISS]; go_process: regulation of neuron differentiation [goid 00…	692.1	255.5	295	1044.6	786.4	369.3	648.8	1236.1	658.8	808.8	844.4	509.9	385.2	278.1	2067.4	168.6	170.2	1611.7	1341.1	235.7
817	GI_34147352-S	NM_024038.2	MGC2803	Homo sapiens hypothetical protein MGC2803 (MGC2803), mRNA.	go_component: nucleus [goid 0005634] [evidence IEA]; go_function: DNA binding [goid 0003677] [evidence IEA]; go_process: regulation of transcription, DNA-dependent [goid 0006355] [evidence IEA]	751.3	181.2	203.6	578.6	804.3	395.9	641.7	989	756.7	1018.7	987.9	676.9	305.5	293.3	2288.5	160.2	154.8	1474.2	1435.4	304
818	GI_7657541-S	NM_014139.1	SCN11A	Homo sapiens sodium channel, voltage-gated, type XI, alpha (SCN11A), mRNA.	go_component: integral to plasma membrane [goid 0005887] [evidence NR]; go_component: membrane fraction [goid 0005624] [evidence NR]; go_component: integral to membrane [goid 0016021] [evidence IEA]; go_component: voltage-gated sodium channel complex [goid 0001518] [evidence IEA]; go_function: voltage-gated sodium channel activity [goid 0005248] [evidence IEA]; go_function: cation channel activit…	629	177.2	207.4	516.4	720.1	284.8	448.3	899	766.9	895.3	840.9	781.6	228.8	198.7	2468.3	136	135.2	1894	1796.5	373.4
819	GI_31542500-S	NM_022047.2	DEF6	Homo sapiens differentially expressed in FDCP 6 homolog (mouse) (DEF6), mRNA.		700.6	193.7	234.5	477.2	783.3	243.4	607.5	1151.9	627.2	805.6	1207.8	781.8	344.3	290.3	2366.3	185	183.5	1555.9	1374.3	267.6
820	GI_41393580-S	NM_005238.2	ETS1	Homo sapiens v-ets erythroblastosis virus E26 oncogene homolog 1 (avian) (ETS1), mRNA.	go_component: nucleus [goid 0005634] [evidence IEA]; go_function: RNA polymerase II transcription factor activity [goid 0003702] [evidence TAS] [pmid 7753825]; go_function: tumor suppressor [goid 0008181] [evidence TAS] [pmid 7753825]; go_function: transcription factor activity [goid 0003700] [evidence IEA]; go_process: negative regulation of cell proliferation [goid 0008285] [evidence TAS] [pmid…	763.9	146.6	220.2	562.9	396.4	379.3	364.6	276.5	610.7	375.6	480.1	444.9	99.9	36.6	4702.2	123.8	63.8	1977.8	1996.8	327.3
821	GI_4557885-S	NM_000211.1	ITGB2	Homo sapiens integrin, beta 2 (antigen CD18 (p95), lymphocyte function-associated antigen 1; macrophage antigen 1 (mac-1) beta subunit) (ITGB2), mRNA.	go_component: integrin complex [goid 0008305] [evidence P] [pmid 1683838]; go_function: cell adhesion receptor activity [goid 0004895] [evidence E]; go_process: integrin-mediated signaling pathway [goid 0007229] [evidence E]; go_process: cell adhesion [goid 0007155] [evidence E]; go_process: antimicrobial humoral response (sensu Invertebrata) [goid 0006960] [evidence E]	676.3	322.1	358.8	495.1	887.9	286.9	548.4	899.4	695	740.3	1044.4	605.9	448.5	417	2387.3	197.8	181.6	1471.8	1477.4	199.7
822	GI_7706315-S	NM_016024.1	CGI-79	Homo sapiens CGI-79 protein (CGI-79), mRNA.	go_function: RNA binding [goid 0003723] [evidence IEA]	1005.2	140.7	215.3	758.1	576.9	678.1	533.2	387	617.8	426.8	598.7	423	114.6	63.1	3563.1	131.8	55	1851.1	1834.4	359.6
823	GI_22538429-A	NM_001908.2	CTSB	Homo sapiens cathepsin B (CTSB), transcript variant 1, mRNA.	go_component: lysosome [goid 0005764] [evidence NR]; go_component: intracellular [goid 0005622] [evidence TAS] [pmid 1645961]; go_function: cathepsin B activity [goid 0004213] [evidence TAS] [pmid 1645961]; go_function: hydrolase activity [goid 0016787] [evidence IEA]; go_process: proteolysis and peptidolysis [goid 0006508] [evidence TAS] [pmid 3463996]	825.6	435.2	519.3	504.8	686.4	358	712.7	410.9	455	585	899.8	414.6	477.6	491	1203.2	264.2	268.5	2256	2085.1	476.3
824	GI_7706293-A	NM_016003.1	DKFZP434J154	Homo sapiens DKFZP434J154 protein (DKFZP434J154), mRNA.		735.7	210.6	231.7	487.5	828.1	317.5	606.1	925.7	685.9	828.6	539.7	583	194.3	195.5	2639.1	122.7	126.4	1955.5	1655.2	450.9
825	GI_42822885-S	NM_002155.3	HSPA6	Homo sapiens heat shock 70kDa protein 6 (HSP70B') (HSPA6), mRNA.	go_function: heat shock protein activity [goid 0003773] [evidence TAS] [pmid 2327978]; go_function: ATP binding [goid 0005524] [evidence IEA]; go_process: heat shock response [goid 0006951] [evidence E] [pmid 1346391]	843.2	225	251.9	842.5	854.7	367	558.4	1417.1	461.4	639.3	1050.8	597.3	368.6	318.4	2186	114.1	124	1220.1	1562.2	277
826	GI_26051238-S	NM_021137.3	TNFAIP1	Homo sapiens tumor necrosis factor, alpha-induced protein 1 (endothelial) (TNFAIP1), mRNA.	go_component: membrane [goid 0016020] [evidence IEA]; go_component: voltage-gated potassium channel complex [goid 0008076] [evidence IEA]; go_component: cellular_component unknown [goid 0008372] [evidence ND]; go_function: voltage-gated potassium channel activity [goid 0005249] [evidence IEA]; go_function: protein binding [goid 0005515] [evidence IEA]; go_function: molecular_function unknown [goi…	924.5	182.7	242.2	714.2	682.1	568.5	531.9	377.1	663.2	471.3	603.6	498.8	178.5	69.2	3209.6	157	148.1	1886.9	1782.9	380.9
827	GI_20302138-S	NM_003650.2	CST7	Homo sapiens cystatin F (leukocystatin) (CST7), mRNA.	go_function: cysteine protease inhibitor activity [goid 0004869] [evidence TAS] [pmid 9733783]; go_function: endopeptidase inhibitor activity [goid 0004866] [evidence E] [pmid 9632704]; go_process: immune response [goid 0006955] [evidence TAS] [pmid 9632704]	601.7	250.2	302.3	766.3	838.6	462.7	411.5	1143.6	421.4	902.1	884.4	458.1	131.3	124.7	2322.1	72	72	2128.4	1638.4	328.8
828	GI_4503300-S	NM_001359.1	DECR1	Homo sapiens 2,4-dienoyl CoA reductase 1, mitochondrial (DECR1), nuclear gene encoding mitochondrial protein, mRNA.	go_component: mitochondrion [goid 0005739] [evidence TAS] [pmid 7818482]; go_function: 2,4-dienoyl-CoA reductase (NADPH) activity [goid 0008670] [evidence TAS] [pmid 7818482]; go_function: oxidoreductase activity [goid 0016491] [evidence IEA]; go_process: metabolism [goid 0008152] [evidence IEA]	751	295.2	346.3	755.8	879.1	486.6	692.3	1233.6	596.6	729.5	725.4	696	354.9	303.4	1996.7	141.1	145.7	1508.3	1315.7	289.3
829	GI_8051633-S	NM_004585.2	RARRES3	Homo sapiens retinoic acid receptor responder (tazarotene induced) 3 (RARRES3), mRNA.	go_function: tumor suppressor [goid 0008181] [evidence P] [pmid 9843971]; go_process: negative regulation of cell proliferation [goid 0008285] [evidence E] [pmid 9843971]	448.2	291.9	328.2	694.6	762.7	405.9	441.6	743.5	521.8	814	892	534.7	402.1	377.6	1730.4	258.6	252	2309.4	1833.9	192.5
830	GI_4505892-S	NM_002668.1	PLP2	Homo sapiens proteolipid protein 2 (colonic epithelium-enriched) (PLP2), mRNA.	go_component: endoplasmic reticulum membrane [goid 0005789] [evidence TAS] [pmid 9124532]; go_component: synaptic vesicle [goid 0008021] [evidence IEA]; go_component: integral to membrane [goid 0016021] [evidence IEA]; go_component: membrane fraction [goid 0005624] [evidence TAS] [pmid 9124532]; go_component: endoplasmic reticulum [goid 0005783] [evidence E] [pmid 9124532]; go_function: ion trans…	712.7	267.7	286.7	424.5	692.1	296.8	751	771.5	509.5	659	1073.8	582.7	476.1	460.8	1924	227.7	226.9	1817.7	1827.9	243.5
831	GI_31543430-S	NM_002708.2	PPP1CA	Homo sapiens protein phosphatase 1, catalytic subunit, alpha isoform (PPP1CA), mRNA.	go_function: protein phosphatase type 1 activity [goid 0000163] [evidence P] [pmid 8392016]; go_function: protein phosphatase type 1, intrinsic catalyst activity [goid 0008598] [evidence NR]; go_function: tumor suppressor [goid 0008181] [evidence NR]; go_function: protein phosphatase type 2C activity [goid 0015071] [evidence IEA]; go_function: protein phosphatase type 2A activity [goid 0000158] […	636.1	259.4	283.8	501	852.9	274.2	542.1	1005.5	605.9	735.7	1088.6	526.7	346.5	305	2419.1	177.1	165.6	1731.4	1550.5	212.9
[truncated: 23,519 more rows]
